# Supplementary material for: MORC2 Mediates Transcriptional Regulation Through Liquid-Liquid Phase Separation and DNA Binding
Source: eLife journal article supplement (doi:10.7554/elife.108479), 2025-09-29
Supplement: fig1-data2 [file Figure 1—source data 2.pdf › Figure 1-source data 2/Figure 1—source data 2.pdf]

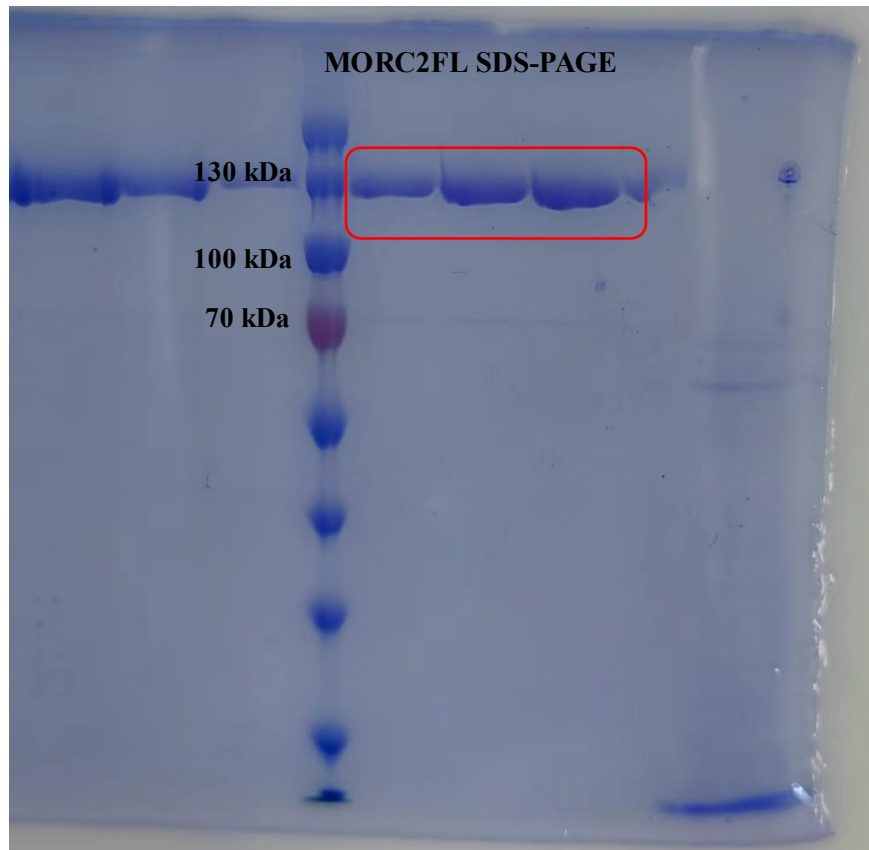

**Figure 1, Source Data 2.** Original SDS-PAGE gel corresponding to Figure 1b. Rainbow molecular weight markers were used. The lane utilized in Figure 1b is outlined in a red rectangular box.
