# Supplementary material for: MORC2 Mediates Transcriptional Regulation Through Liquid-Liquid Phase Separation and DNA Binding
Source: eLife journal article supplement (doi:10.7554/elife.108479), 2025-09-29
Supplement: fig2-data2 [file Figure 2—source data 2.pdf › Figure 2—source data 2.pdf]

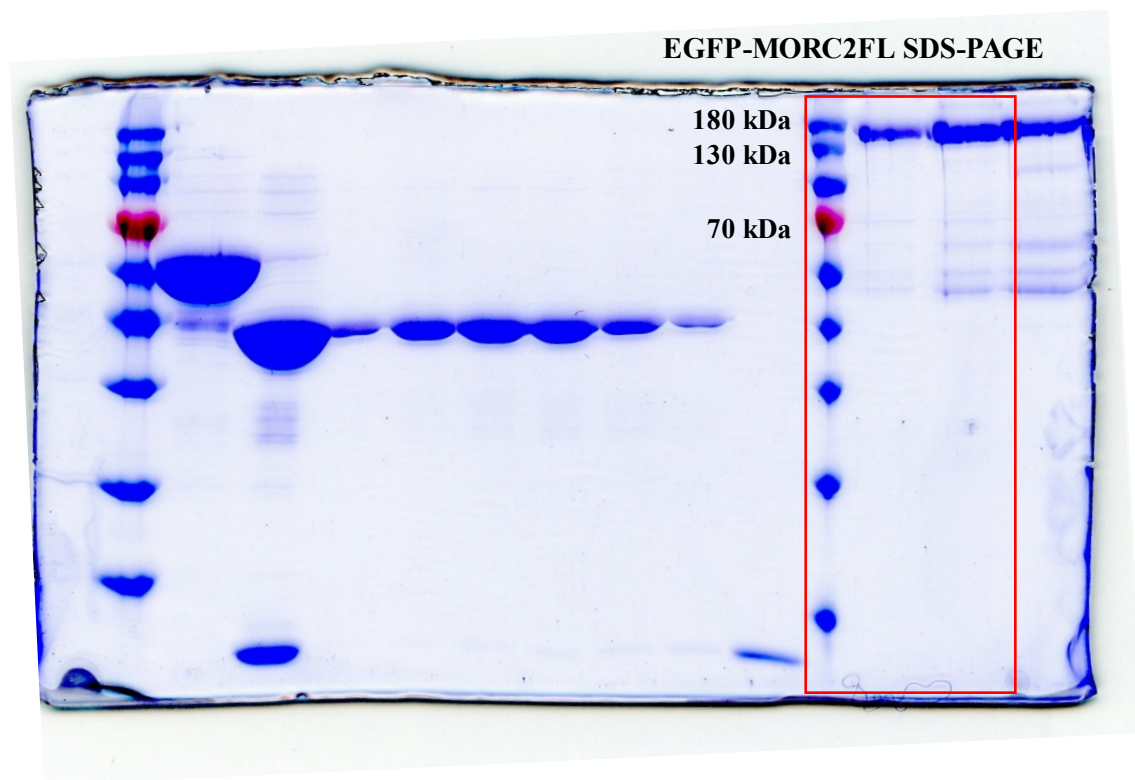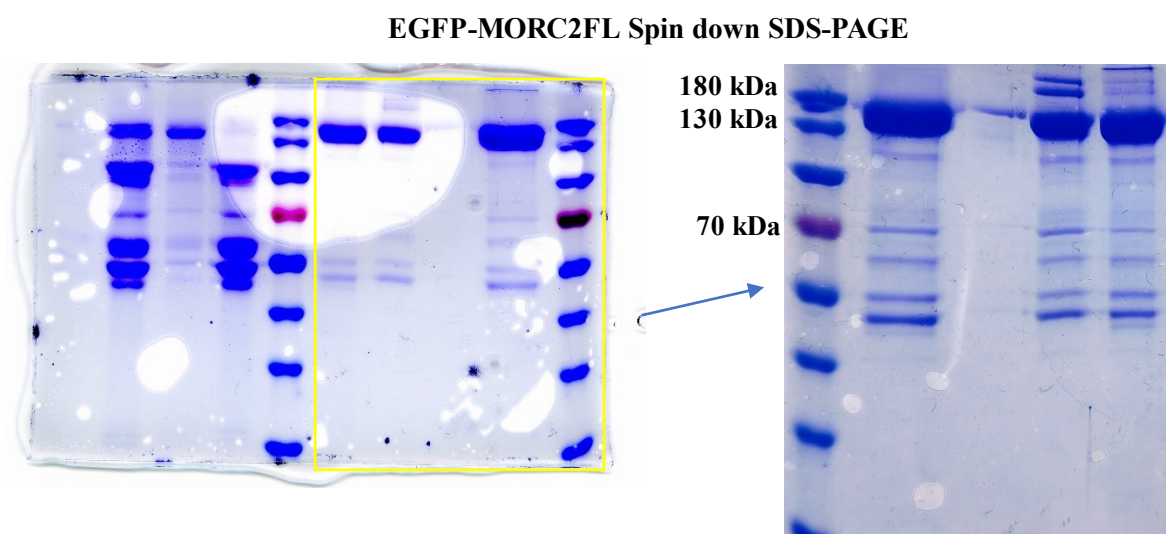

**Figure 2, Source Data 2.** Original SDS-PAGE gel corresponding to Figure 2a and 2b. Rainbow molecular weight markers were used. The lane used in Figure 2a is outlined in a red rectangular box, and another relevant lane is marked with a yellow rectangular box. Panel b was rotated 180° and only the target region was captured by local imaging.
