# Supplementary material for: MORC2 Mediates Transcriptional Regulation Through Liquid-Liquid Phase Separation and DNA Binding
Source: eLife journal article supplement (doi:10.7554/elife.108479), 2025-09-29
Supplement: fig2-figsupp1-data2 [file Figure 2—figure supplement1-source data 2.pdf › Figure 2—figure supplement1-source data 2.pdf]

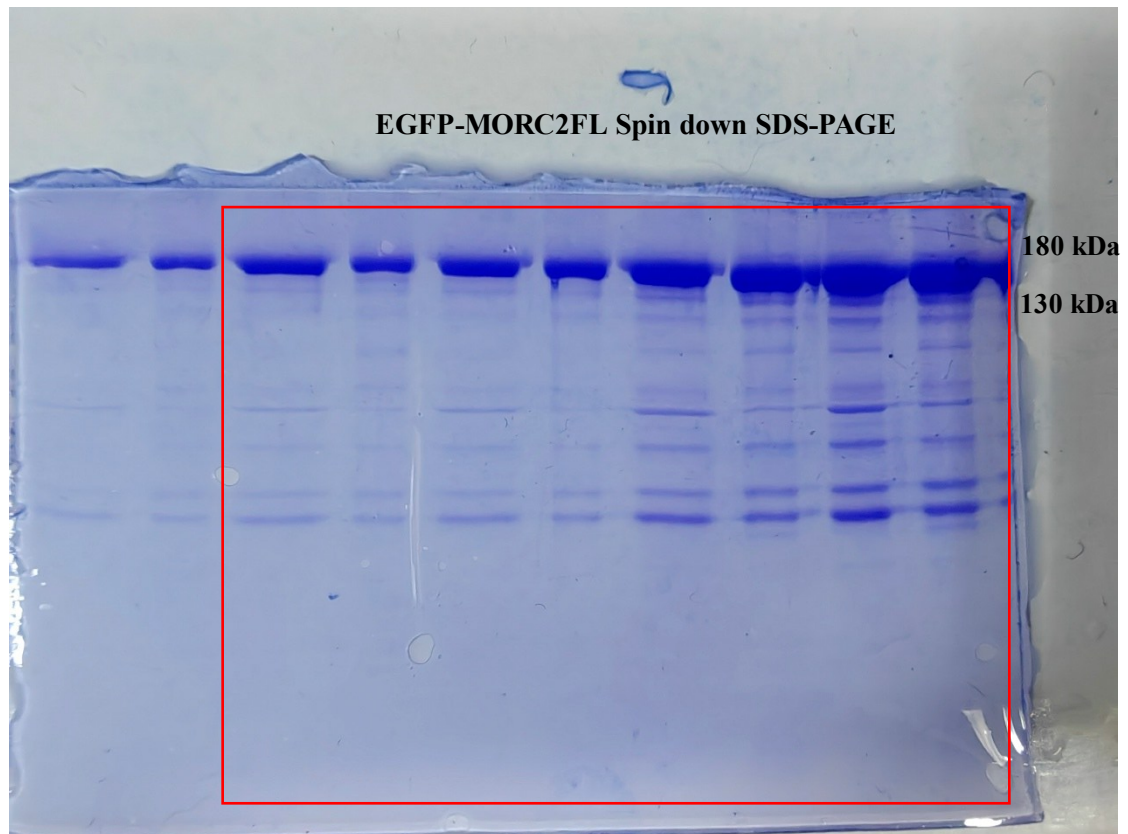

**Figure 2-figure supplement 1, Source data 2.** Original SDS-PAGE gel corresponding to Figure 2-figure supplement 1b. Molecular weight was consistently estimated using parallel SDS-PAGE gels prepared in the same batch. The lane utilized is outlined in a red rectangular box.
