# Supplementary material for: MORC2 Mediates Transcriptional Regulation Through Liquid-Liquid Phase Separation and DNA Binding
Source: eLife journal article supplement (doi:10.7554/elife.108479), 2025-09-29
Supplement: fig3-data2 [file Figure 3—source data 2.pdf › Figure 3-source data 2/Figure 3—source data 2.pdf]

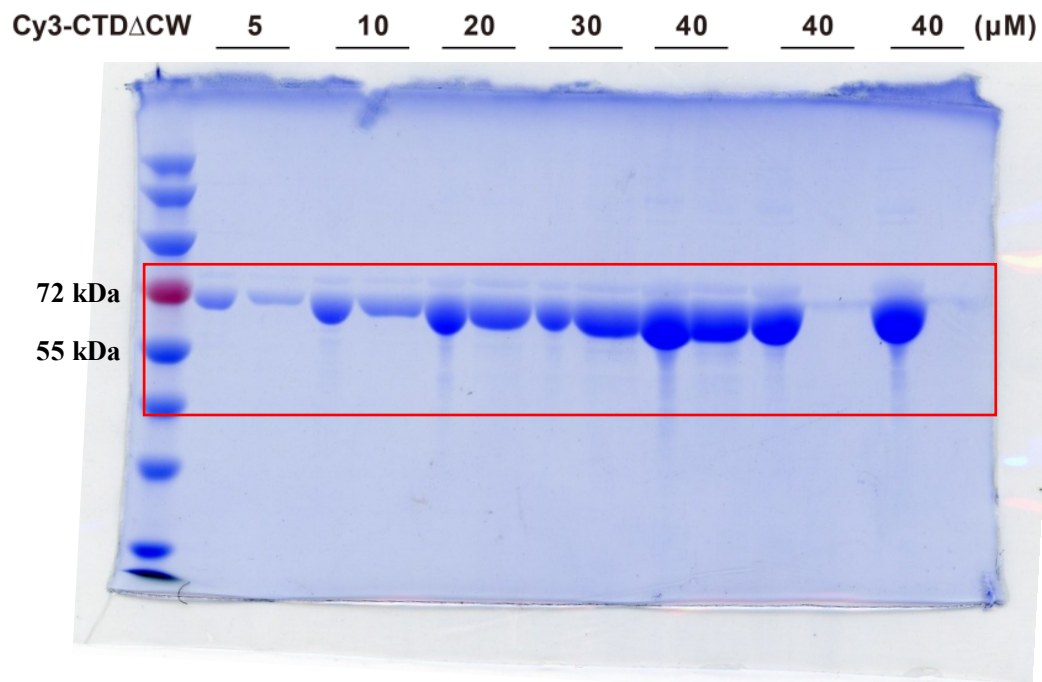

**Figure 3, Source Data 2.** Original SDS-PAGE gel corresponding to Figure 3d. Rainbow molecular weight markers were used. The lane shown in Figure 3d is outlined in a red rectangular box. The first lane represents the supernatant sample, and the second lane represents the pellet sample. Three independent experimental repeats are presented in Source Data 1.
