# Supplementary material for: MORC2 Mediates Transcriptional Regulation Through Liquid-Liquid Phase Separation and DNA Binding
Source: eLife journal article supplement (doi:10.7554/elife.108479), 2025-09-29
Supplement: fig3-figsupp3-data2 [file Figure 3—figure supplement 3-source data 2.pdf › Figure 3—figure supplement 3-source data 2.pdf]

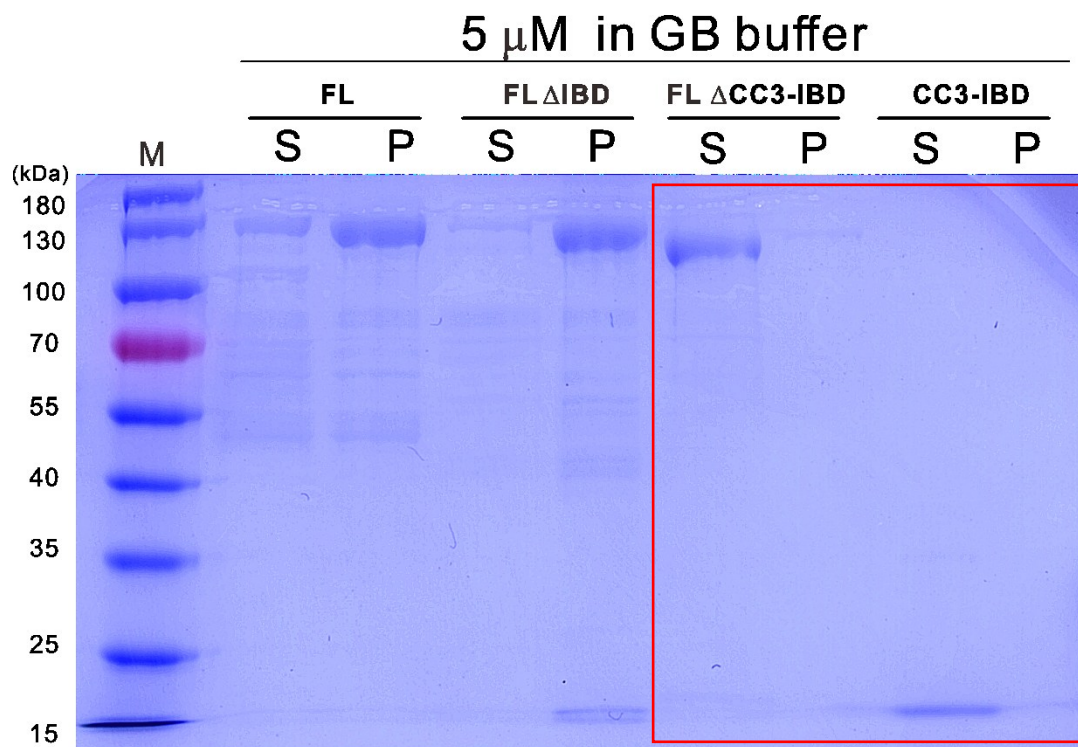

**Figure 3-figure supplement 3, Source data 2.** Original SDS-PAGE gel corresponding to Figure 3-figure supplement 3a. Rainbow molecular weight markers were used. The lane utilized in Figure 3-figure supplement 3a is outlined in a red rectangular box. S: supernatant sample and P: pellet sample.
