# Supplementary material for: MORC2 mediates transcriptional regulation through liquid-liquid phase separation
Source: eLife. 2026 May 20;14:RP108479. doi: 10.7554/eLife.108479 (PMC13189624; doi:10.7554/eLife.108479)
Supplement: Supplementary file 3. [file elife-108479-supp3.xlsx]

## Sheet: all.fpkm_anno
gene_id	Exonic.gene.sizes	CC3-deletion-1_count	CC3-deletion-1_FPKM	CC3-deletion-2_count	CC3-deletion-2_FPKM	CC3-deletion-3_count	CC3-deletion-3_FPKM	KS-1_count	KS-1_FPKM	KS-2_count	KS-2_FPKM	KS-3_count	KS-3_FPKM	GFP-1_count	GFP-1_FPKM	GFP-2_count	GFP-2_FPKM	GFP-3_count	GFP-3_FPKM	IDRa-deletion-1_count	IDRa-deletion-1_FPKM	IDRa-deletion-2_count	IDRa-deletion-2_FPKM	IDRa-deletion-3_count	IDRa-deletion-3_FPKM	MORC2FL-1_count	MORC2FL-1_FPKM	MORC2FL-2_count	MORC2FL-2_FPKM	MORC2FL-3_count	MORC2FL-3_FPKM	Chr	Start	End	Strand	GeneSymbol	Description	GO_BP	GO_CC	GO_MF	KO	Pathway
ENSG00000000003	4536	873	12.99	963	10.63	1182	11.82	882	11.14	747	10.83	778	10.91	915	11.74	814	11.69	885	11.43	830	10.78	952	11.09	810	10.58	1061	11.3	940	11.74	945	11.59	X	100627108	100639991	-	TSPAN6	tetraspanin 6 [Source:HGNC Symbol%3BAcc:HGNC:11858]	GO:1901223:negative regulation of non-canonical NF-kappaB signal transduction;GO:0039532:negative regulation of viral-induced cytoplasmic pattern recognition receptor signaling pathway;GO:0043123:positive regulation of canonical NF-kappaB signal transduction;	GO:0070062:extracellular exosome;	-	K17295	-
ENSG00000000005	1476	3	0.14	1	0.03	0	0	0	0	1	0.04	1	0.04	1	0.04	0	0	1	0.04	1	0.04	0	0	0	0	4	0.13	0	0	1	0.04	X	100584936	100599885	+	TNMD	tenomodulin [Source:HGNC Symbol%3BAcc:HGNC:17757]	GO:0071773:cellular response to BMP stimulus;GO:0001886:endothelial cell morphogenesis;GO:0016525:negative regulation of angiogenesis;GO:0001937:negative regulation of endothelial cell proliferation;GO:0030948:negative regulation of vascular endothelial growth factor receptor signaling pathway;GO:0035990:tendon cell differentiation;	GO:0005737:cytoplasm;GO:0005635:nuclear envelope;	-	-	-
ENSG00000000419	9276	1405	10.22	1880	10.15	2068	10.11	1610	9.94	1452	10.29	1432	9.82	1668	10.46	1511	10.61	1745	11.02	1753	11.13	1890	10.77	1701	10.86	1834	9.55	1504	9.19	1577	9.46	20	50934867	50959140	-	DPM1	dolichyl-phosphate mannosyltransferase subunit 1%2C catalytic [Source:HGNC Symbol%3BAcc:HGNC:3005]	GO:0019348:dolichol metabolic process;GO:0019673:GDP-mannose metabolic process;GO:0006506:GPI anchor biosynthetic process;GO:0035268:protein mannosylation;GO:0035269:protein O-linked mannosylation;GO:0006486:protein glycosylation;	GO:0033185:dolichol-phosphate-mannose synthase complex;GO:0005783:endoplasmic reticulum;GO:0005789:endoplasmic reticulum membrane;GO:0016020:membrane;GO:0005634:nucleus;	GO:0043178:alcohol binding;GO:0004582:dolichyl-phosphate beta-D-mannosyltransferase activity;GO:0004169:dolichyl-phosphate-mannose-protein mannosyltransferase activity;GO:0005537:mannose binding;	K00721	;ko00510 N-Glycan biosynthesis;ko01100 Metabolic pathways;
ENSG00000000457	6883	180	1.77	244	1.77	302	1.99	205	1.71	221	2.11	197	1.82	253	2.14	220	2.08	222	1.89	174	1.49	210	1.61	209	1.8	250	1.75	234	1.93	247	2	1	169849631	169894267	-	SCYL3	SCY1 like pseudokinase 3 [Source:HGNC Symbol%3BAcc:HGNC:19285]	GO:0016477:cell migration;GO:0006954:inflammatory response;GO:0048666:neuron development;GO:0006468:protein phosphorylation;GO:0021522:spinal cord motor neuron differentiation;	GO:0005737:cytoplasm;GO:0005794:Golgi apparatus;GO:0000139:Golgi membrane;GO:0030027:lamellipodium;	GO:0005524:ATP binding;GO:0042802:identical protein binding;	K17542	-
ENSG00000000460	5970	503	5.69	728	6.1	702	5.33	508	4.87	471	5.19	480	5.12	494	4.81	479	5.23	531	5.21	529	5.22	585	5.18	501	4.97	650	5.26	613	5.82	564	5.26	1	169662007	169854080	+	C1orf112	chromosome 1 open reading frame 112 [Source:HGNC Symbol%3BAcc:HGNC:25565]	-	-	-	K17542;K17985	-;ko04137 Mitophagy - animal;ko04140 Autophagy - animal;ko05010 Alzheimer disease;ko05014 Amyotrophic lateral sclerosis;ko05016 Huntington disease;ko05017 Spinocerebellar ataxia;ko05022 Pathways of neurodegeneration - multiple diseases;
ENSG00000000938	3382	0	0	0	0	1	0.01	0	0	0	0	0	0	0	0	0	0	0	0	2	0.03	0	0	2	0.04	0	0	2	0.03	0	0	1	27612064	27635185	-	FGR	FGR proto-oncogene%2C Src family tyrosine kinase [Source:HGNC Symbol%3BAcc:HGNC:3697]	GO:0030282:bone mineralization;GO:0030154:cell differentiation;GO:0050830:defense response to Gram-positive bacterium;GO:0045087:innate immune response;GO:0007229:integrin-mediated signaling pathway;GO:0032815:negative regulation of natural killer cell activation;GO:0018108:peptidyl-tyrosine phosphorylation;GO:0030335:positive regulation of cell migration;GO:0001819:positive regulation of cytokin…	GO:0015629:actin cytoskeleton;GO:0016235:aggresome;GO:0005829:cytosol;GO:0031234:extrinsic component of cytoplasmic side of plasma membrane;GO:0005743:mitochondrial inner membrane;GO:0005758:mitochondrial intermembrane space;GO:0005886:plasma membrane;GO:0032587:ruffle membrane;GO:0070062:extracellular exosome;GO:0005576:extracellular region;GO:0034774:secretory granule lumen;	GO:0005524:ATP binding;GO:0034988:Fc-gamma receptor I complex binding;GO:0034987:immunoglobulin receptor binding;GO:0004715:non-membrane spanning protein tyrosine kinase activity;GO:0001784:phosphotyrosine residue binding;GO:0019901:protein kinase binding;GO:0004713:protein tyrosine kinase activity;GO:0005102:signaling receptor binding;GO:0004714:transmembrane receptor protein tyrosine kinase act…	K08891	;ko04062 Chemokine signaling pathway;
ENSG00000000971	15284	567	2.5	702	2.3	736	2.18	879	3.29	727	3.13	772	3.21	718	2.73	664	2.83	635	2.43	686	2.64	775	2.68	676	2.62	795	2.51	644	2.39	617	2.25	1	196651754	196752476	+	CFH	complement factor H [Source:HGNC Symbol%3BAcc:HGNC:4883]	GO:0006956:complement activation;GO:0006957:complement activation, alternative pathway;GO:0030449:regulation of complement activation;GO:1903659:regulation of complement-dependent cytotoxicity;	GO:0072562:blood microparticle;GO:0070062:extracellular exosome;GO:0005576:extracellular region;GO:0005615:extracellular space;	GO:0043395:heparan sulfate proteoglycan binding;GO:0008201:heparin binding;GO:0042802:identical protein binding;	K04004	;ko04610 Complement and coagulation cascades;ko05150 Staphylococcus aureus infection;
ENSG00000001036	2822	3643	87.14	4693	83.25	5295	85.08	4431	89.93	3752	87.43	3756	84.68	4303	88.72	3619	83.52	4123	85.61	3928	81.99	4511	84.49	4041	84.82	4896	83.8	4106	82.45	4314	85.06	6	143494812	143511720	-	FUCA2	alpha-L-fucosidase 2 [Source:HGNC Symbol%3BAcc:HGNC:4008]	GO:0006004:fucose metabolic process;GO:0016139:glycoside catabolic process;GO:2000535:regulation of entry of bacterium into host cell;GO:0009617:response to bacterium;	GO:0035578:azurophil granule lumen;GO:0005788:endoplasmic reticulum lumen;GO:0070062:extracellular exosome;GO:0005576:extracellular region;GO:0005615:extracellular space;GO:0005764:lysosome;	GO:0004560:alpha-L-fucosidase activity;	K01206	;ko00511 Other glycan degradation;ko04142 Lysosome;
ENSG00000001084	8618	946	7.41	1291	7.5	1376	7.24	1041	6.92	907	6.92	951	7.02	862	5.82	835	6.31	952	6.47	1178	8.05	1130	6.93	1125	7.73	1077	6.04	964	6.34	930	6	6	53497341	53616970	-	GCLC	glutamate-cysteine ligase catalytic subunit [Source:HGNC Symbol%3BAcc:HGNC:4311]	GO:0007568:obsolete aging;GO:0097746:blood vessel diameter maintenance;GO:0045454:cell redox homeostasis;GO:0044344:cellular response to fibroblast growth factor stimulus;GO:0071372:cellular response to follicle-stimulating hormone stimulus;GO:0071333:cellular response to glucose stimulus;GO:0035729:cellular response to hepatocyte growth factor stimulus;GO:0032869:cellular response to insulin sti…	GO:0005829:cytosol;GO:0017109:glutamate-cysteine ligase complex;GO:0005739:mitochondrion;	GO:0043531:ADP binding;GO:0005524:ATP binding;GO:0016595:glutamate binding;GO:0004357:glutamate-cysteine ligase activity;GO:0000287:magnesium ion binding;GO:0044877:protein-containing complex binding;	K11204	;ko00270 Cysteine and methionine metabolism;ko00480 Glutathione metabolism;ko01100 Metabolic pathways;ko01240 Biosynthesis of cofactors;ko04212 Longevity regulating pathway - worm;ko04216 Ferroptosis;
ENSG00000001167	6209	602	6.55	818	6.59	912	6.66	686	6.33	601	6.37	628	6.44	687	6.44	673	7.06	698	6.59	635	6.02	728	6.2	717	6.84	867	6.74	703	6.42	843	7.55	6	41072974	41102403	+	NFYA	nuclear transcription factor Y subunit alpha [Source:HGNC Symbol%3BAcc:HGNC:7804]	GO:0045893:positive regulation of DNA-templated transcription;GO:0006357:regulation of transcription by RNA polymerase II;GO:0006355:regulation of DNA-templated transcription;GO:0048511:rhythmic process;GO:0006366:transcription by RNA polymerase II;	GO:0016602:CCAAT-binding factor complex;GO:0000785:chromatin;GO:0005654:nucleoplasm;GO:0005634:nucleus;GO:0032993:protein-DNA complex;GO:0090575:RNA polymerase II transcription regulator complex;	GO:0003677:DNA binding;GO:0003700:DNA-binding transcription factor activity;GO:0000981:DNA-binding transcription factor activity, RNA polymerase II-specific;GO:0000978:RNA polymerase II cis-regulatory region sequence-specific DNA binding;	K08064	;ko04612 Antigen processing and presentation;ko05017 Spinocerebellar ataxia;ko05152 Tuberculosis;
ENSG00000001460	8511	57	0.45	88	0.52	94	0.5	80	0.54	61	0.47	84	0.63	73	0.5	58	0.44	78	0.54	64	0.44	91	0.57	84	0.58	82	0.47	75	0.5	86	0.56	1	24356999	24416934	-	STPG1	sperm tail PG-rich repeat containing 1 [Source:HGNC Symbol%3BAcc:HGNC:28070]	GO:0043065:positive regulation of apoptotic process;GO:1902110:positive regulation of mitochondrial membrane permeability involved in apoptotic process;	GO:0005739:mitochondrion;GO:0005634:nucleus;	-	K17985	;ko04137 Mitophagy - animal;ko04140 Autophagy - animal;ko05010 Alzheimer disease;ko05014 Amyotrophic lateral sclerosis;ko05016 Huntington disease;ko05017 Spinocerebellar ataxia;ko05022 Pathways of neurodegeneration - multiple diseases;
ENSG00000001461	9396	638	4.58	799	4.26	959	4.63	748	4.56	676	4.73	640	4.33	717	4.44	579	4.01	706	4.4	698	4.38	788	4.43	649	4.09	890	4.58	686	4.14	739	4.38	1	24415802	24472976	+	NIPAL3	NIPA like domain containing 3 [Source:HGNC Symbol%3BAcc:HGNC:25233]	GO:0015693:magnesium ion transport;	GO:0016020:membrane;GO:0005634:nucleus;	GO:0015095:magnesium ion transmembrane transporter activity;GO:0003677:DNA binding;GO:0046872:metal ion binding;	K15603;K01557;K04613	-
ENSG00000001497	12555	1452	7.81	1976	7.88	2135	7.71	1686	7.69	1371	7.18	1344	6.81	1588	7.36	1546	8.02	1533	7.15	1570	7.37	1808	7.61	1598	7.54	1963	7.55	1700	7.67	1739	7.71	X	65438549	65534810	-	LAS1L	LAS1 like ribosome biogenesis factor [Source:HGNC Symbol%3BAcc:HGNC:25726]	GO:0000460:maturation of 5.8S rRNA;GO:0000470:maturation of LSU-rRNA;	GO:0090730:Las1 complex;GO:0016020:membrane;GO:0071339:MLL1 complex;GO:0005730:nucleolus;GO:0005654:nucleoplasm;GO:0030687:preribosome, large subunit precursor;	GO:0004519:endonuclease activity;GO:0003723:RNA binding;	K16912	-
ENSG00000001561	4644	1	0.01	2	0.02	3	0.03	0	0	1	0.01	0	0	0	0	1	0.01	0	0	1	0.01	1	0.01	1	0.01	1	0.01	0	0	1	0.01	6	46129989	46146688	+	ENPP4	ectonucleotide pyrophosphatase/phosphodiesterase 4 [Source:HGNC Symbol%3BAcc:HGNC:3359]	GO:0007596:blood coagulation;GO:0030194:positive regulation of blood coagulation;GO:0046130:purine ribonucleoside catabolic process;	GO:0070062:extracellular exosome;GO:0101003:ficolin-1-rich granule membrane;GO:0016020:membrane;GO:0005886:plasma membrane;	GO:0047710:bis(5'-adenosyl)-triphosphatase activity;GO:0046872:metal ion binding;	K18424	;ko00230 Purine metabolism;ko01100 Metabolic pathways;
ENSG00000001617	4826	1247	17.44	1877	19.47	1984	18.64	1284	15.24	1218	16.6	1327	17.5	1290	15.55	1093	14.75	1436	17.44	1380	16.84	1517	16.61	1376	16.89	1485	14.86	1239	14.55	1478	17.04	3	50155045	50189075	+	SEMA3F	semaphorin 3F [Source:HGNC Symbol%3BAcc:HGNC:10728]	GO:0048846:axon extension involved in axon guidance;GO:0007411:axon guidance;GO:0021785:branchiomotor neuron axon guidance;GO:0021612:facial nerve structural organization;GO:0050919:negative chemotaxis;GO:0048843:negative regulation of axon extension involved in axon guidance;GO:0021675:nerve development;GO:0001755:neural crest cell migration;GO:1901166:neural crest cell migration involved in aut…	GO:0005615:extracellular space;GO:0098978:glutamatergic synapse;	GO:0045499:chemorepellent activity;GO:0030215:semaphorin receptor binding;	K06840	;ko04360 Axon guidance;
ENSG00000001626	16821	6	0.02	5	0.01	6	0.02	6	0.02	1	0	8	0.03	11	0.04	5	0.02	6	0.02	4	0.01	7	0.02	13	0.05	8	0.02	14	0.05	5	0.02	7	117287120	117715971	+	CFTR	CF transmembrane conductance regulator [Source:HGNC Symbol%3BAcc:HGNC:1884]	GO:0015701:bicarbonate transport;GO:0071320:cellular response to cAMP;GO:1904322:cellular response to forskolin;GO:1902476:chloride transmembrane transport;GO:0006695:cholesterol biosynthetic process;GO:0030301:cholesterol transport;GO:0051454:intracellular pH elevation;GO:0060081:membrane hyperpolarization;GO:0050891:multicellular organismal-level water homeostasis;GO:1902161:positive regulation…	GO:0016324:apical plasma membrane;GO:0009986:cell surface;GO:0034707:chloride channel complex;GO:0030669:clathrin-coated endocytic vesicle membrane;GO:0005737:cytoplasm;GO:0005829:cytosol;GO:0005769:early endosome;GO:0031901:early endosome membrane;GO:0005789:endoplasmic reticulum membrane;GO:0010008:endosome membrane;GO:0030660:Golgi-associated vesicle membrane;GO:0005765:lysosomal membrane;GO:0…	GO:0005524:ATP binding;GO:0140603:obsolete ATP hydrolysis activity;GO:0043225:ATPase-coupled inorganic anion transmembrane transporter activity;GO:0042626:ATPase-coupled transmembrane transporter activity;GO:0015106:bicarbonate transmembrane transporter activity;GO:0051087:protein-folding chaperone binding;GO:0005254:chloride channel activity;GO:0019869:chloride channel inhibitor activity;GO:0017…	K05031	;ko02010 ABC transporters;ko04024 cAMP signaling pathway;ko04152 AMPK signaling pathway;ko04530 Tight junction;ko04971 Gastric acid secretion;ko04972 Pancreatic secretion;ko04976 Bile secretion;ko05110 Vibrio cholerae infection;
ENSG00000001629	7389	1530	13.98	1945	13.18	2123	13.03	1812	14.05	1581	14.07	1653	14.23	1737	13.68	1551	13.67	1617	12.82	1837	14.65	1812	12.96	1599	12.82	2052	13.41	1737	13.32	1807	13.61	7	92245974	92401383	+	ANKIB1	ankyrin repeat and IBR domain containing 1 [Source:HGNC Symbol%3BAcc:HGNC:22215]	GO:0032436:positive regulation of proteasomal ubiquitin-dependent protein catabolic process;GO:0000209:protein polyubiquitination;GO:0006511:ubiquitin-dependent protein catabolic process;	GO:0005737:cytoplasm;GO:0000151:ubiquitin ligase complex;	GO:0046872:metal ion binding;GO:0031624:ubiquitin conjugating enzyme binding;GO:0061630:ubiquitin protein ligase activity;	K11967	-
ENSG00000001630	4171	121	1.96	134	1.61	149	1.62	139	1.91	125	1.97	124	1.89	173	2.41	125	1.95	158	2.22	121	1.71	149	1.89	136	1.93	159	1.84	135	1.83	127	1.69	7	92084987	92134803	-	CYP51A1	cytochrome P450 family 51 subfamily A member 1 [Source:HGNC Symbol%3BAcc:HGNC:2649]	GO:0006695:cholesterol biosynthetic process;GO:1900222:negative regulation of amyloid-beta clearance;GO:0042177:negative regulation of protein catabolic process;GO:0050709:negative regulation of protein secretion;GO:0006694:steroid biosynthetic process;GO:0016125:sterol metabolic process;	GO:0005783:endoplasmic reticulum;GO:0005789:endoplasmic reticulum membrane;GO:0016020:membrane;	GO:0020037:heme binding;GO:0005506:iron ion binding;GO:0004497:monooxygenase activity;GO:0016491:oxidoreductase activity;GO:0008398:sterol 14-demethylase activity;	K05917	;ko00100 Steroid biosynthesis;ko01100 Metabolic pathways;
ENSG00000001631	21110	546	1.75	754	1.79	890	1.91	677	1.84	570	1.78	539	1.62	597	1.65	556	1.72	608	1.69	643	1.79	747	1.87	665	1.87	823	1.88	739	1.98	682	1.8	7	92197498	92246166	-	KRIT1	KRIT1 ankyrin repeat containing [Source:HGNC Symbol%3BAcc:HGNC:1573]	GO:0001525:angiogenesis;GO:0045454:cell redox homeostasis;GO:0016525:negative regulation of angiogenesis;GO:2000352:negative regulation of endothelial cell apoptotic process;GO:0010596:negative regulation of endothelial cell migration;GO:0001937:negative regulation of endothelial cell proliferation;GO:2000114:regulation of establishment of cell polarity;GO:0007264:small GTPase mediated signal tra…	GO:0005911:cell-cell junction;GO:0005737:cytoplasm;GO:0005856:cytoskeleton;GO:0005615:extracellular space;GO:0005886:plasma membrane;	GO:0030695:GTPase regulator activity;GO:0008017:microtubule binding;GO:0005546:phosphatidylinositol-4,5-bisphosphate binding;	K17705	;ko04015 Rap1 signaling pathway;ko04212 Longevity regulating pathway - worm;ko04520 Adherens junction;
ENSG00000002016	4503	191	2.86	287	3.19	306	3.08	223	2.84	224	3.27	221	3.12	211	2.73	190	2.75	220	2.86	208	2.72	231	2.71	245	3.22	278	2.98	252	3.17	256	3.16	12	911736	990053	-	RAD52	RAD52 homolog%2C DNA repair protein [Source:HGNC Symbol%3BAcc:HGNC:9824]	GO:0006974:DNA damage response;GO:0034599:cellular response to oxidative stress;GO:0010792:DNA double-strand break processing involved in repair via single-strand annealing;GO:0000730:DNA recombinase assembly;GO:0006310:DNA recombination;GO:0006302:double-strand break repair;GO:0000724:double-strand break repair via homologous recombination;GO:0045002:double-strand break repair via single-strand …	GO:0005654:nucleoplasm;GO:0005634:nucleus;GO:0032991:protein-containing complex;GO:0032993:protein-DNA complex;	GO:0003677:DNA binding;GO:0042802:identical protein binding;GO:0003697:single-stranded DNA binding;	K10873	;ko03440 Homologous recombination;
ENSG00000002079	6307	1	0.01	2	0.02	1	0.01	2	0.02	2	0.02	2	0.02	6	0.06	7	0.07	6	0.06	5	0.05	0	0	1	0.01	5	0.04	6	0.05	1	0.01	7	99238829	99311130	+	MYH16	myosin heavy chain 16 pseudogene [Source:HGNC Symbol%3BAcc:HGNC:31038]	-	GO:0030016:myofibril;GO:0016459:myosin complex;	GO:0051015:actin filament binding;GO:0005524:ATP binding;GO:0003774:cytoskeletal motor activity;	K17751	;ko04022 cGMP-PKG signaling pathway;ko04260 Cardiac muscle contraction;ko04261 Adrenergic signaling in cardiomyocytes;ko04814 Motor proteins;ko04919 Thyroid hormone signaling pathway;ko05410 Hypertrophic cardiomyopathy;ko05414 Dilated cardiomyopathy;ko05416 Viral myocarditis;
ENSG00000002330	1708	233	9.21	273	8	348	9.24	253	8.48	233	8.97	247	9.2	239	8.14	229	8.73	269	9.23	256	8.83	338	10.46	223	7.73	328	9.28	260	8.63	255	8.31	11	64269830	64284704	-	BAD	BCL2 associated agonist of cell death [Source:HGNC Symbol%3BAcc:HGNC:936]	GO:0097202:activation of cysteine-type endopeptidase activity;GO:0006919:activation of cysteine-type endopeptidase activity involved in apoptotic process;GO:0046031:ADP metabolic process;GO:0006915:apoptotic process;	GO:0005829:cytosol;GO:0005741:mitochondrial outer membrane;GO:0005739:mitochondrion;	GO:0071889:14-3-3 protein binding;GO:0008656:cysteine-type endopeptidase activator activity involved in apoptotic process;GO:0008289:lipid binding;GO:0005543:phospholipid binding;	K02158	;ko01521 EGFR tyrosine kinase inhibitor resistance;ko01522 Endocrine resistance;ko01524 Platinum drug resistance;ko04012 ErbB signaling pathway;ko04014 Ras signaling pathway;ko04022 cGMP-PKG signaling pathway;ko04024 cAMP signaling pathway;ko04062 Chemokine signaling pathway;ko04140 Autophagy - animal;ko04151 PI3K-Akt signaling pathway;ko04210 Apoptosis;ko04370 VEGF signaling pathway;ko04510 Foca…
ENSG00000002549	3779	998	17.83	1390	18.41	1573	18.87	1783	27.02	1425	24.8	1555	26.18	1169	18	1068	18.4	1176	18.23	1418	22.1	1556	21.76	1404	22.01	1164	14.88	1057	15.85	1217	17.92	4	17577198	17607972	+	LAP3	leucine aminopeptidase 3 [Source:HGNC Symbol%3BAcc:HGNC:18449]	GO:0006508:proteolysis;	GO:0005829:cytosol;GO:0030496:midbody;GO:0005654:nucleoplasm;GO:0005802:trans-Golgi network;GO:0070062:extracellular exosome;GO:0005925:focal adhesion;GO:0005634:nucleus;	GO:0004180:carboxypeptidase activity;GO:0030145:manganese ion binding;GO:0070006:metalloaminopeptidase activity;GO:0008233:peptidase activity;GO:0004177:aminopeptidase activity;GO:0008235:metalloexopeptidase activity;	K11142	;ko00330 Arginine and proline metabolism;ko00480 Glutathione metabolism;ko01100 Metabolic pathways;
ENSG00000002586	4858	1809	25.14	2319	23.9	2698	25.18	2390	28.18	2015	27.28	2011	26.34	2272	27.21	1980	26.54	2202	26.56	2015	24.43	2487	27.06	2019	24.62	2906	28.89	2489	29.03	2401	27.5	X	2691187	2741309	+	CD99	CD99 molecule (Xg blood group) [Source:HGNC Symbol%3BAcc:HGNC:7082]	GO:0034109:homotypic cell-cell adhesion;GO:2000391:positive regulation of neutrophil extravasation;GO:0072683:T cell extravasation;	GO:0005737:cytoplasm;GO:0005925:focal adhesion;GO:0005886:plasma membrane;	-	K06520	;ko04514 Cell adhesion molecules;ko04670 Leukocyte transendothelial migration;
ENSG00000002587	7435	1	0.01	12	0.08	11	0.07	6	0.05	4	0.04	9	0.08	6	0.05	6	0.05	5	0.04	11	0.09	7	0.05	6	0.05	9	0.06	5	0.04	1	0.01	4	11393150	11429564	-	HS3ST1	heparan sulfate-glucosamine 3-sulfotransferase 1 [Source:HGNC Symbol%3BAcc:HGNC:5194]	GO:0006024:glycosaminoglycan biosynthetic process;	GO:0005796:Golgi lumen;	GO:0008467:[heparan sulfate]-glucosamine 3-sulfotransferase 1 activity;GO:0008146:sulfotransferase activity;	K01024	;ko00534 Glycosaminoglycan biosynthesis - heparan sulfate / heparin;
ENSG00000002726	3786	6	0.11	3	0.04	10	0.12	7	0.11	11	0.19	10	0.17	5	0.08	1	0.02	8	0.12	8	0.12	5	0.07	4	0.06	7	0.09	5	0.07	7	0.1	7	150824627	150861504	+	AOC1	amine oxidase copper containing 1 [Source:HGNC Symbol%3BAcc:HGNC:80]	GO:0009308:amine metabolic process;GO:0097185:cellular response to azide;GO:0071280:cellular response to copper ion;GO:0035874:cellular response to copper ion starvation;GO:0071504:cellular response to heparin;GO:0071420:cellular response to histamine;GO:0009445:putrescine metabolic process;GO:0046677:response to antibiotic;	GO:0005923:bicellular tight junction;GO:0070062:extracellular exosome;GO:0005576:extracellular region;GO:0005615:extracellular space;GO:0005777:peroxisome;GO:0005886:plasma membrane;GO:0035580:specific granule lumen;	GO:0005509:calcium ion binding;GO:0005507:copper ion binding;GO:0052597:diamine oxidase activity;GO:0008201:heparin binding;GO:0052598:histamine oxidase activity;GO:0052599:methylputrescine oxidase activity;GO:0008131:primary amine oxidase activity;GO:0052600:propane-1,3-diamine oxidase activity;GO:0042803:protein homodimerization activity;GO:0044877:protein-containing complex binding;GO:0048038:…	K11182	;ko00330 Arginine and proline metabolism;ko00340 Histidine metabolism;ko00380 Tryptophan metabolism;ko01100 Metabolic pathways;
ENSG00000002745	3264	13	0.27	16	0.25	20	0.28	14	0.25	4	0.08	18	0.35	9	0.16	13	0.26	12	0.22	10	0.18	11	0.18	8	0.15	14	0.21	8	0.14	6	0.1	7	121325367	121341104	+	WNT16	Wnt family member 16 [Source:HGNC Symbol%3BAcc:HGNC:16267]	GO:0046849:bone remodeling;GO:0060070:canonical Wnt signaling pathway;GO:0060317:cardiac epithelial to mesenchymal transition;GO:0045165:cell fate commitment;GO:0030216:keratinocyte differentiation;GO:0043616:keratinocyte proliferation;GO:0060548:obsolete negative regulation of cell death;GO:0030182:neuron differentiation;GO:0003408:optic cup formation involved in camera-type eye development;GO:0…	GO:0005737:cytoplasm;GO:0005576:extracellular region;GO:0005615:extracellular space;	GO:0005125:cytokine activity;GO:0005109:frizzled binding;	K01558	;ko04150 mTOR signaling pathway;ko04310 Wnt signaling pathway;ko04390 Hippo signaling pathway;ko04550 Signaling pathways regulating pluripotency of stem cells;ko04916 Melanogenesis;ko04934 Cushing syndrome;ko05010 Alzheimer disease;ko05022 Pathways of neurodegeneration - multiple diseases;ko05165 Human papillomavirus infection;ko05200 Pathways in cancer;ko05202 Transcriptional misregulation in ca…
ENSG00000002746	13935	77	0.37	93	0.33	105	0.34	100	0.41	65	0.31	92	0.42	89	0.37	70	0.33	81	0.34	80	0.34	88	0.33	95	0.4	86	0.3	76	0.31	89	0.36	7	43112629	43566001	+	HECW1	HECT%2C C2 and WW domain containing E3 ubiquitin protein ligase 1 [Source:HGNC Symbol%3BAcc:HGNC:22195]	GO:0090090:negative regulation of canonical Wnt signaling pathway;GO:2000650:negative regulation of sodium ion transmembrane transporter activity;GO:0045732:positive regulation of protein catabolic process;GO:0043161:proteasome-mediated ubiquitin-dependent protein catabolic process;GO:0000209:protein polyubiquitination;GO:0016567:protein ubiquitination;GO:0048814:regulation of dendrite morphogene…	GO:0005737:cytoplasm;GO:0005829:cytosol;	GO:0061630:ubiquitin protein ligase activity;	K12167	-
ENSG00000002822	6955	9	0.09	18	0.13	15	0.1	12	0.1	12	0.11	11	0.1	10	0.08	9	0.08	11	0.09	13	0.11	10	0.08	13	0.11	12	0.08	10	0.08	8	0.06	7	1815793	2233243	-	MAD1L1	mitotic arrest deficient 1 like 1 [Source:HGNC Symbol%3BAcc:HGNC:6762]	GO:0051315:attachment of mitotic spindle microtubules to kinetochore;GO:0051301:cell division;GO:0051220:cytoplasmic sequestering of protein;GO:1902426:deactivation of mitotic spindle assembly checkpoint;GO:0007094:mitotic spindle assembly checkpoint signaling;GO:0042130:negative regulation of T cell proliferation;GO:0090235:regulation of metaphase plate congression;GO:0048538:thymus development;	GO:0005813:centrosome;GO:0005737:cytoplasm;GO:0005829:cytosol;GO:0000776:kinetochore;GO:0072686:mitotic spindle;GO:0044615:nuclear pore nuclear basket;GO:0005634:nucleus;GO:0005819:spindle;GO:0000922:spindle pole;	GO:0042802:identical protein binding;GO:0043515:kinetochore binding;	K06638	-
ENSG00000002834	7061	3619	34.6	4647	32.94	5630	36.15	4298	34.86	3734	34.78	3877	34.94	4426	36.47	3978	36.69	4383	36.37	4049	33.78	4875	36.49	4293	36.01	4931	33.73	4220	33.87	4046	31.88	17	38869859	38921770	+	LASP1	LIM and SH3 protein 1 [Source:HGNC Symbol%3BAcc:HGNC:6513]	GO:0006811:monoatomic ion transport;	GO:0030864:cortical actin cytoskeleton;GO:0005737:cytoplasm;GO:0005925:focal adhesion;GO:0005938:cell cortex;GO:0005856:cytoskeleton;	GO:0051015:actin filament binding;GO:0045296:cadherin binding;GO:0015075:monoatomic ion transmembrane transporter activity;GO:0046872:metal ion binding;GO:0003779:actin binding;	K15494;K12581	;ko04024 cAMP signaling pathway;ko04728 Dopaminergic synapse;ko05030 Cocaine addiction;ko05031 Amphetamine addiction;ko05034 Alcoholism;;ko03018 RNA degradation;
ENSG00000002919	4133	466	7.61	575	6.96	683	7.49	523	7.25	487	7.75	435	6.7	503	7.08	458	7.22	509	7.22	504	7.18	622	7.95	451	6.46	508	5.94	449	6.16	476	6.41	17	48103357	48123601	+	SNX11	sorting nexin 11 [Source:HGNC Symbol%3BAcc:HGNC:14975]	GO:0006886:intracellular protein transport;GO:0016050:vesicle organization;	GO:0005768:endosome;GO:0016020:membrane;	GO:1901981:phosphatidylinositol phosphate binding;	K17924	-
ENSG00000002933	3477	2	0.04	0	0	0	0	2	0.03	0	0	0	0	1	0.02	0	0	0	0	2	0.03	0	0	0	0	2	0.03	1	0.02	0	0	7	150800403	150805118	+	TMEM176A	transmembrane protein 176A [Source:HGNC Symbol%3BAcc:HGNC:24930]	GO:2001199:negative regulation of dendritic cell differentiation;	-	-	-	-
ENSG00000003056	3585	2621	49.35	3448	48.14	3879	49.06	3112	49.72	2534	46.48	2663	47.26	2723	44.2	2625	47.68	3014	49.26	2737	44.97	3295	48.58	2855	47.17	3160	42.57	2655	41.97	2779	43.13	12	8940361	8949761	-	M6PR	mannose-6-phosphate receptor%2C cation dependent [Source:HGNC Symbol%3BAcc:HGNC:6752]	GO:0008333:endosome to lysosome transport;GO:0007041:lysosomal transport;GO:0006622:protein targeting to lysosome;GO:0006898:receptor-mediated endocytosis;GO:0033299:secretion of lysosomal enzymes;	GO:0030669:clathrin-coated endocytic vesicle membrane;GO:0005768:endosome;GO:0005770:late endosome;GO:0005765:lysosomal membrane;GO:0016020:membrane;GO:0048471:perinuclear region of cytoplasm;GO:0005886:plasma membrane;GO:0005802:trans-Golgi network;GO:0032588:trans-Golgi network membrane;GO:0030133:transport vesicle;	GO:0019904:protein domain specific binding;GO:1905394:retromer complex binding;GO:0004888:transmembrane signaling receptor activity;	K10089	;ko04142 Lysosome;ko04145 Phagosome;ko05132 Salmonella infection;
ENSG00000003096	6928	2066	20.13	2654	19.18	2837	18.57	2226	18.4	2035	19.32	2063	18.95	2357	19.8	2102	19.76	2258	19.1	2182	18.55	2335	17.81	2173	18.58	2980	20.78	2572	21.04	2468	19.82	X	117897813	118117340	-	KLHL13	kelch like family member 13 [Source:HGNC Symbol%3BAcc:HGNC:22931]	GO:0007049:cell cycle;GO:0051301:cell division;GO:0016567:protein ubiquitination;GO:0032465:regulation of cytokinesis;	GO:0031463:Cul3-RING ubiquitin ligase complex;GO:0005829:cytosol;GO:0030496:midbody;	GO:0097602:cullin family protein binding;GO:0047485:obsolete protein N-terminus binding;	K10447	;ko04120 Ubiquitin mediated proteolysis;
ENSG00000003137	4839	22	0.31	43	0.44	66	0.62	54	0.64	40	0.54	44	0.58	28	0.34	30	0.4	37	0.45	48	0.58	41	0.45	35	0.43	55	0.55	41	0.48	51	0.59	2	72129238	72147862	-	CYP26B1	cytochrome P450 family 26 subfamily B member 1 [Source:HGNC Symbol%3BAcc:HGNC:20581]	GO:0060349:bone morphogenesis;GO:0001709:cell fate determination;GO:0071300:cellular response to retinoic acid;GO:0070268:cornification;GO:0030326:embryonic limb morphogenesis;GO:0061436:establishment of skin barrier;GO:0001768:establishment of T cell polarity;GO:0006954:inflammatory response;GO:0001822:kidney development;GO:0007140:male meiotic nuclear division;GO:0048387:negative regulation of …	GO:0005737:cytoplasm;GO:0005789:endoplasmic reticulum membrane;	GO:0020037:heme binding;GO:0005506:iron ion binding;GO:0004497:monooxygenase activity;GO:0016491:oxidoreductase activity;GO:0016709:oxidoreductase activity, acting on paired donors, with incorporation or reduction of molecular oxygen, NAD(P)H as one donor, and incorporation of one atom of oxygen;GO:0008401:retinoic acid 4-hydroxylase activity;GO:0001972:retinoic acid binding;	K12664	;ko00830 Retinol metabolism;ko01100 Metabolic pathways;
ENSG00000003147	4883	59	0.82	86	0.88	90	0.84	74	0.87	77	1.04	61	0.79	59	0.7	74	0.99	61	0.73	61	0.74	83	0.9	73	0.89	109	1.08	85	0.99	75	0.85	7	8113184	8262687	-	ICA1	islet cell autoantigen 1 [Source:HGNC Symbol%3BAcc:HGNC:5343]	GO:0006836:neurotransmitter transport;GO:0050796:regulation of insulin secretion;GO:0051049:regulation of transport;GO:0043254:regulation of protein-containing complex assembly;	GO:0005737:cytoplasm;GO:0005829:cytosol;GO:0005794:Golgi apparatus;GO:0000139:Golgi membrane;GO:0043231:intracellular membrane-bounded organelle;GO:0030667:secretory granule membrane;GO:0030672:synaptic vesicle membrane;GO:0030425:dendrite;GO:0005795:Golgi stack;GO:0048471:perinuclear region of cytoplasm;	GO:0140090:membrane curvature sensor activity;GO:0019904:protein domain specific binding;	K01875;K01557	;ko00970 Aminoacyl-tRNA biosynthesis;;ko00350 Tyrosine metabolism;ko01100 Metabolic pathways;
ENSG00000003249	4462	80	1.21	93	1.04	119	1.21	81	1.04	66	0.97	90	1.28	93	1.21	54	0.79	80	1.05	82	1.08	74	0.88	64	0.85	109	1.18	92	1.17	85	1.06	16	90004871	90019890	-	DBNDD1	dysbindin domain containing 1 [Source:HGNC Symbol%3BAcc:HGNC:28455]	GO:0006469:negative regulation of protein kinase activity;	GO:0005737:cytoplasm;	-	K18047;K12581	-;ko03018 RNA degradation;
ENSG00000003393	33513	676	1.36	813	1.21	956	1.29	824	1.41	649	1.27	698	1.33	597	1.04	654	1.27	760	1.33	755	1.33	907	1.43	747	1.32	829	1.19	657	1.11	675	1.12	2	201700267	201782112	-	ALS2	alsin Rho guanine nucleotide exchange factor ALS2 [Source:HGNC Symbol%3BAcc:HGNC:443]	GO:0007409:axonogenesis;GO:0001662:behavioral fear response;GO:0008219:cell death;GO:0016197:endosomal transport;GO:0007032:endosome organization;GO:0001701:in utero embryonic development;GO:0007626:locomotory behavior;GO:0007041:lysosomal transport;GO:0007528:neuromuscular junction development;GO:0048812:neuron projection morphogenesis;GO:0043547:positive regulation of GTPase activity;GO:0045860…	GO:0005813:centrosome;GO:0005829:cytosol;GO:0030425:dendrite;GO:0043197:dendritic spine;GO:0005769:early endosome;GO:0030426:growth cone;GO:0030027:lamellipodium;GO:0016020:membrane;GO:0043025:neuronal cell body;GO:0005634:nucleus;GO:0014069:postsynaptic density;GO:0032991:protein-containing complex;GO:0001726:ruffle;GO:0031982:vesicle;	GO:0005096:GTPase activator activity;GO:0005085:guanyl-nucleotide exchange factor activity;GO:0042802:identical protein binding;GO:0042803:protein homodimerization activity;GO:0043539:protein serine/threonine kinase activator activity;GO:0031267:small GTPase binding;	K04575	;ko05014 Amyotrophic lateral sclerosis;ko05022 Pathways of neurodegeneration - multiple diseases;
ENSG00000003400	8920	46	0.35	91	0.51	83	0.42	68	0.44	54	0.4	54	0.39	48	0.31	51	0.37	57	0.37	61	0.4	53	0.31	60	0.4	71	0.38	60	0.38	56	0.35	2	201182872	201229428	+	CASP10	caspase 10 [Source:HGNC Symbol%3BAcc:HGNC:1500]	GO:0006919:activation of cysteine-type endopeptidase activity involved in apoptotic process;GO:0006915:apoptotic process;GO:0043123:positive regulation of canonical NF-kappaB signal transduction;GO:0042981:regulation of apoptotic process;	GO:0031265:CD95 death-inducing signaling complex;GO:0005737:cytoplasm;GO:0005829:cytosol;GO:0097342:ripoptosome;	GO:0004197:cysteine-type endopeptidase activity;GO:0097153:cysteine-type endopeptidase activity involved in apoptotic process;GO:0097199:cysteine-type endopeptidase activity involved in apoptotic signaling pathway;GO:0097200:cysteine-type endopeptidase activity involved in execution phase of apoptosis;GO:0035877:death effector domain binding;GO:0031625:ubiquitin protein ligase binding;	K04400	;ko04210 Apoptosis;ko04622 RIG-I-like receptor signaling pathway;ko04668 TNF signaling pathway;ko05152 Tuberculosis;ko05161 Hepatitis B;
ENSG00000003402	22478	922	2.77	1275	2.84	1370	2.76	1247	3.18	1068	3.12	1027	2.91	1116	2.89	1011	2.93	1048	2.73	1123	2.94	1131	2.66	1111	2.93	1375	2.95	1158	2.92	1153	2.85	2	201116154	201176687	+	CFLAR	CASP8 and FADD like apoptosis regulator [Source:HGNC Symbol%3BAcc:HGNC:1876]	GO:0006919:activation of cysteine-type endopeptidase activity involved in apoptotic process;GO:0006915:apoptotic process;GO:0071549:cellular response to dexamethasone stimulus;GO:0071364:cellular response to epidermal growth factor stimulus;GO:0071392:cellular response to estradiol stimulus;GO:0071456:cellular response to hypoxia;GO:0032869:cellular response to insulin stimulus;GO:0071732:cellula…	GO:0031265:CD95 death-inducing signaling complex;GO:0005737:cytoplasm;GO:0005829:cytosol;GO:0031264:death-inducing signaling complex;GO:0045121:membrane raft;GO:0097342:ripoptosome;GO:0005634:nucleus;	GO:0097153:cysteine-type endopeptidase activity involved in apoptotic process;GO:0097199:cysteine-type endopeptidase activity involved in apoptotic signaling pathway;GO:0097200:cysteine-type endopeptidase activity involved in execution phase of apoptosis;GO:0005123:death receptor binding;GO:0008047:enzyme activator activity;GO:0002020:protease binding;GO:0044877:protein-containing complex binding…	K04724;K00088;K02927	;ko04064 NF-kappa B signaling pathway;ko04140 Autophagy - animal;ko04210 Apoptosis;ko04217 Necroptosis;ko04668 TNF signaling pathway;ko05142 Chagas disease;ko05160 Hepatitis C;;ko00230 Purine metabolism;ko00983 Drug metabolism - other enzymes;ko01100 Metabolic pathways;ko01232 Nucleotide metabolism;;ko03010 Ribosome;ko04120 Ubiquitin mediated proteolysis;ko04137 Mitophagy - animal;ko04140 Autopha…
ENSG00000003436	11714	15376	88.61	20502	87.61	21692	83.96	19106	93.42	16559	92.96	16562	89.96	17244	85.66	15659	87.05	16272	81.39	18646	93.77	19340	87.26	17459	88.28	22038	90.87	17396	84.15	17882	84.94	2	187464230	187565760	-	TFPI	tissue factor pathway inhibitor [Source:HGNC Symbol%3BAcc:HGNC:11760]	GO:0007596:blood coagulation;GO:0071347:cellular response to interleukin-1;GO:0071222:cellular response to lipopolysaccharide;GO:0071383:cellular response to steroid hormone stimulus;GO:0030195:negative regulation of blood coagulation;GO:0032355:response to estradiol;	GO:0031225:obsolete anchored component of membrane;GO:0005901:caveola;GO:0009986:cell surface;GO:0005783:endoplasmic reticulum;GO:0005576:extracellular region;GO:0005615:extracellular space;GO:0005886:plasma membrane;	GO:0004866:endopeptidase inhibitor activity;GO:0004867:serine-type endopeptidase inhibitor activity;	K03909	;ko04610 Complement and coagulation cascades;
ENSG00000003509	3651	454	8.39	548	7.51	602	7.48	505	7.92	470	8.47	514	8.96	435	6.93	448	7.99	515	8.27	557	8.99	581	8.41	526	8.53	574	7.59	489	7.59	522	7.96	2	37231631	37253403	+	NDUFAF7	NADH:ubiquinone oxidoreductase complex assembly factor 7 [Source:HGNC Symbol%3BAcc:HGNC:28816]	GO:0032981:mitochondrial respiratory chain complex I assembly;GO:0019918:peptidyl-arginine methylation, to symmetrical-dimethyl arginine;	GO:0005615:extracellular space;GO:0005759:mitochondrial matrix;GO:0005739:mitochondrion;	GO:0019899:enzyme binding;GO:0008168:methyltransferase activity;GO:0035243:protein-arginine omega-N symmetric methyltransferase activity;	K18164;K06070	;ko04714 Thermogenesis;;ko04015 Rap1 signaling pathway;ko04925 Aldosterone synthesis and secretion;ko05208 Chemical carcinogenesis - reactive oxygen species;
ENSG00000003756	10357	2188	14.26	2887	13.95	3149	13.79	2716	15.02	2260	14.35	2321	14.26	2570	14.44	2294	14.42	2477	14.01	2395	13.62	2857	14.58	2390	13.67	3210	14.97	2684	14.69	2742	14.73	3	50088919	50119021	+	RBM5	RNA binding motif protein 5 [Source:HGNC Symbol%3BAcc:HGNC:9902]	GO:0006915:apoptotic process;GO:0000398:mRNA splicing, via spliceosome;GO:0008285:negative regulation of cell population proliferation;GO:0043065:positive regulation of apoptotic process;GO:0000381:regulation of alternative mRNA splicing, via spliceosome;GO:0006396:RNA processing;GO:0000245:spliceosomal complex assembly;	GO:0005654:nucleoplasm;GO:0005634:nucleus;GO:0005681:spliceosomal complex;	GO:0003677:DNA binding;GO:0046872:metal ion binding;GO:0003729:mRNA binding;GO:0003723:RNA binding;	K13094	-
ENSG00000003987	6928	90	0.88	91	0.66	120	0.79	73	0.6	92	0.87	59	0.54	82	0.69	65	0.61	87	0.74	81	0.69	90	0.69	84	0.72	120	0.84	82	0.67	77	0.62	8	17296794	17413528	-	MTMR7	myotubularin related protein 7 [Source:HGNC Symbol%3BAcc:HGNC:7454]	GO:0046855:obsolete inositol phosphate dephosphorylation;GO:0006661:phosphatidylinositol biosynthetic process;GO:0046856:phosphatidylinositol dephosphorylation;GO:0006470:protein dephosphorylation;	GO:0005737:cytoplasm;GO:0005829:cytosol;GO:0012505:endomembrane system;GO:0016020:membrane;	GO:0016312:inositol bisphosphate phosphatase activity;GO:0052629:phosphatidylinositol-3,5-bisphosphate 3-phosphatase activity;GO:0004438:phosphatidylinositol-3-phosphate phosphatase activity;GO:0004725:protein tyrosine phosphatase activity;	K18083	;ko00562 Inositol phosphate metabolism;ko01100 Metabolic pathways;ko04070 Phosphatidylinositol signaling system;
ENSG00000003989	7905	2241	19.14	3101	19.64	3237	18.57	2149	15.57	2110	17.55	2214	17.82	2319	17.07	2052	16.9	2290	16.97	2391	17.82	2535	16.95	2441	18.29	2839	17.35	2346	16.82	2628	18.5	8	17497088	17570573	+	SLC7A2	solute carrier family 7 member 2 [Source:HGNC Symbol%3BAcc:HGNC:11060]	GO:0089718:amino acid import across plasma membrane;GO:0006865:amino acid transport;GO:1902475:L-alpha-amino acid transmembrane transport;GO:0015807:L-amino acid transport;GO:0097638:L-arginine import across plasma membrane;GO:1903352:L-ornithine transmembrane transport;GO:0150104:transport across blood-brain barrier;	GO:0030054:cell junction;GO:0005886:plasma membrane;	GO:0015171:amino acid transmembrane transporter activity;GO:0015174:basic amino acid transmembrane transporter activity;GO:0015179:L-amino acid transmembrane transporter activity;GO:0061459:L-arginine transmembrane transporter activity;GO:0015189:L-lysine transmembrane transporter activity;GO:0000064:L-ornithine transmembrane transporter activity;	K13864	-
ENSG00000004059	1825	558	20.64	706	19.36	820	20.37	653	20.49	569	20.5	531	18.51	715	22.8	603	21.52	677	21.74	630	20.34	676	19.58	638	20.71	784	20.75	706	21.92	687	20.95	7	127588386	127591700	+	ARF5	ADP ribosylation factor 5 [Source:HGNC Symbol%3BAcc:HGNC:658]	GO:0006886:intracellular protein transport;GO:0006890:retrograde vesicle-mediated transport, Golgi to endoplasmic reticulum;GO:0016192:vesicle-mediated transport;	GO:0005737:cytoplasm;GO:0005794:Golgi apparatus;GO:0048471:perinuclear region of cytoplasm;GO:0005886:plasma membrane;	GO:0005525:GTP binding;GO:0003924:GTPase activity;	K07940	;ko04144 Endocytosis;
ENSG00000004139	11105	103	0.63	110	0.5	162	0.66	169	0.87	103	0.61	105	0.6	124	0.65	110	0.65	114	0.6	133	0.71	126	0.6	96	0.51	179	0.78	112	0.57	100	0.5	17	28364356	28404049	+	SARM1	sterile alpha and TIR motif containing 1 [Source:HGNC Symbol%3BAcc:HGNC:17074]	GO:0030154:cell differentiation;GO:0045087:innate immune response;GO:0019677:NAD catabolic process;GO:0034128:negative regulation of MyD88-independent toll-like receptor signaling pathway;GO:0007399:nervous system development;GO:1901216:obsolete positive regulation of neuron death;GO:0042981:regulation of apoptotic process;GO:0048814:regulation of dendrite morphogenesis;GO:1901214:obsolete regula…	GO:0030424:axon;GO:0005737:cytoplasm;GO:0005829:cytosol;GO:0030425:dendrite;GO:0031315:extrinsic component of mitochondrial outer membrane;GO:0005874:microtubule;GO:0005739:mitochondrion;GO:0045202:synapse;	GO:0042802:identical protein binding;GO:0050135:NAD(P)+ nucleosidase activity;GO:0003953:NAD+ nucleosidase activity;GO:0061809:NAD+ nucleotidase, cyclic ADP-ribose generating;GO:0035591:signaling adaptor activity;	K14613	;ko01523 Antifolate resistance;ko04977 Vitamin digestion and absorption;ko04978 Mineral absorption;
ENSG00000004142	2670	1619	40.93	2142	40.16	2552	43.34	1960	42.05	1653	40.71	1713	40.82	2048	44.63	1654	40.34	1998	43.85	1916	42.27	2202	43.59	1954	43.35	2250	40.7	1915	40.64	1993	41.53	17	28346633	28357527	-	POLDIP2	DNA polymerase delta interacting protein 2 [Source:HGNC Symbol%3BAcc:HGNC:23781]	GO:0070987:error-free translesion synthesis;GO:0070584:mitochondrion morphogenesis;GO:0090307:mitotic spindle assembly;GO:0016242:negative regulation of macroautophagy;GO:1904531:positive regulation of actin filament binding;GO:0051894:positive regulation of focal adhesion assembly;GO:0045931:positive regulation of mitotic cell cycle;GO:1903490:positive regulation of mitotic cytokinesis;GO:200110…	GO:0005911:cell-cell junction;GO:0030496:midbody;GO:0005759:mitochondrial matrix;GO:0042645:mitochondrial nucleoid;GO:0005739:mitochondrion;GO:0072686:mitotic spindle;GO:0005634:nucleus;GO:0005886:plasma membrane;	GO:0003677:DNA binding;	K17809	-
ENSG00000004399	9557	620	4.38	842	4.41	933	4.43	676	4.05	678	4.67	695	4.63	715	4.35	660	4.5	726	4.45	635	3.91	787	4.35	644	3.99	843	4.26	780	4.62	883	5.14	3	129555214	129606676	-	PLXND1	plexin D1 [Source:HGNC Symbol%3BAcc:HGNC:9107]	GO:0001525:angiogenesis;GO:0035904:aorta development;GO:0001569:branching involved in blood vessel morphogenesis;GO:0003279:cardiac septum development;GO:0060976:coronary vasculature development;GO:0060666:dichotomous subdivision of terminal units involved in salivary gland branching;GO:0043542:endothelial cell migration;GO:0001822:kidney development;GO:0007162:negative regulation of cell adhesio…	GO:0030027:lamellipodium;GO:0031258:lamellipodium membrane;GO:0005886:plasma membrane;GO:0002116:semaphorin receptor complex;	GO:0019904:protein domain specific binding;GO:0017154:semaphorin receptor activity;	K06822	-
ENSG00000004455	17967	6008	22.57	8065	22.47	8842	22.31	6810	21.71	5842	21.38	5965	21.12	6539	21.18	6169	22.36	6718	21.91	6776	22.22	7773	22.87	6782	22.36	7736	20.8	6731	21.23	7041	21.81	1	33007986	33080996	-	AK2	adenylate kinase 2 [Source:HGNC Symbol%3BAcc:HGNC:362]	GO:0006172:ADP biosynthetic process;GO:0046033:AMP metabolic process;GO:0046034:ATP metabolic process;GO:0015949:nucleobase-containing small molecule interconversion;	GO:0005737:cytoplasm;GO:0070062:extracellular exosome;GO:0005758:mitochondrial intermembrane space;GO:0005739:mitochondrion;GO:0097226:sperm mitochondrial sheath;	GO:0004017:adenylate kinase activity;GO:0005524:ATP binding;	K00939	;ko00230 Purine metabolism;ko00730 Thiamine metabolism;ko01100 Metabolic pathways;ko01232 Nucleotide metabolism;ko01240 Biosynthesis of cofactors;
ENSG00000004468	6857	27	0.27	36	0.26	30	0.2	29	0.24	20	0.19	22	0.2	19	0.16	18	0.17	14	0.12	27	0.23	32	0.25	18	0.16	21	0.15	20	0.17	20	0.16	4	15778275	15853232	+	CD38	CD38 molecule [Source:HGNC Symbol%3BAcc:HGNC:1667]	GO:0097190:apoptotic signaling pathway;GO:0014824:artery smooth muscle contraction;GO:0050853:B cell receptor signaling pathway;GO:0007565:female pregnancy;GO:0060292:long-term synaptic depression;GO:0019674:NAD metabolic process;GO:0043066:negative regulation of apoptotic process;GO:0045779:negative regulation of bone resorption;GO:0010977:negative regulation of neuron projection development;GO:…	GO:0016323:basolateral plasma membrane;GO:0009986:cell surface;GO:0070062:extracellular exosome;GO:0016020:membrane;GO:0005634:nucleus;GO:0005886:plasma membrane;GO:0030667:secretory granule membrane;	GO:0042802:identical protein binding;GO:0050135:NAD(P)+ nucleosidase activity;GO:0003953:NAD+ nucleosidase activity;GO:0061809:NAD+ nucleotidase, cyclic ADP-ribose generating;GO:0016849:phosphorus-oxygen lyase activity;GO:0016740:transferase activity;	K01242	;ko00760 Nicotinate and nicotinamide metabolism;ko01100 Metabolic pathways;ko04020 Calcium signaling pathway;ko04640 Hematopoietic cell lineage;ko04921 Oxytocin signaling pathway;ko04970 Salivary secretion;ko04972 Pancreatic secretion;
ENSG00000004478	5163	3316	43.36	4660	45.18	4977	43.71	3650	40.49	3015	38.4	3116	38.4	3346	37.71	3202	40.39	3722	42.24	3662	41.78	4374	44.78	3824	43.87	3607	33.74	3238	35.54	3697	39.84	12	2794970	2805423	+	FKBP4	FKBP prolyl isomerase 4 [Source:HGNC Symbol%3BAcc:HGNC:3720]	GO:0061077:chaperone-mediated protein folding;GO:0006825:copper ion transport;GO:0031115:negative regulation of microtubule polymerization;GO:0031111:negative regulation of microtubule polymerization or depolymerization;GO:0010977:negative regulation of neuron projection development;GO:0006457:protein folding;GO:0000413:protein peptidyl-prolyl isomerization;	GO:0044295:axonal growth cone;GO:0005737:cytoplasm;GO:0005829:cytosol;GO:0070062:extracellular exosome;GO:0005874:microtubule;GO:0005739:mitochondrion;GO:0043025:neuronal cell body;GO:0005654:nucleoplasm;GO:0048471:perinuclear region of cytoplasm;GO:0032991:protein-containing complex;	GO:0032767:copper-dependent protein binding;GO:0005528:FK506 binding;GO:0031072:heat shock protein binding;GO:0003755:peptidyl-prolyl cis-trans isomerase activity;GO:0030674:protein-macromolecule adaptor activity;GO:0003723:RNA binding;GO:0048156:tau protein binding;	K09571	;ko04915 Estrogen signaling pathway;
ENSG00000004487	18325	2541	9.36	3189	8.71	3524	8.72	2771	8.66	2309	8.29	2321	8.06	2595	8.24	2404	8.54	2698	8.63	2570	8.26	2803	8.08	2685	8.68	3385	8.92	2884	8.92	2890	8.78	1	23019443	23083689	+	KDM1A	lysine demethylase 1A [Source:HGNC Symbol%3BAcc:HGNC:29079]	GO:0000380:alternative mRNA splicing, via spliceosome;GO:0071320:cellular response to cAMP;GO:0071480:cellular response to gamma radiation;GO:0034644:cellular response to UV;GO:0021987:cerebral cortex development;GO:0046098:guanine metabolic process;GO:0034720:histone H3-K4 demethylation;GO:0033169:histone H3-K9 demethylation;GO:0055001:muscle cell development;GO:0043392:negative regulation of DN…	GO:0000785:chromatin;GO:0000781:chromosome, telomeric region;GO:1990391:DNA repair complex;GO:0005654:nucleoplasm;GO:0005634:nucleus;GO:0032991:protein-containing complex;GO:0005667:transcription regulator complex;GO:0005694:chromosome;GO:0017053:transcription repressor complex;	GO:0050681:nuclear androgen receptor binding;GO:0003682:chromatin binding;GO:0032451:demethylase activity;GO:0019899:enzyme binding;GO:0050660:flavin adenine dinucleotide binding;GO:0032452:histone demethylase activity;GO:0034648:obsolete histone demethylase activity (H3-dimethyl-K4 specific);GO:0032453:histone H3K4 demethylase activity;GO:0032454:histone H3K9 demethylase activity;GO:0043426:MRF …	K11450	;ko04714 Thermogenesis;
ENSG00000004534	7299	1711	15.82	2313	15.86	2538	15.77	2348	18.42	1810	16.31	2008	17.5	1858	14.81	1790	15.97	1867	14.99	1831	14.78	2094	15.16	1961	15.91	2458	16.27	2106	16.35	2327	17.74	3	49940007	50100045	+	RBM6	RNA binding motif protein 6 [Source:HGNC Symbol%3BAcc:HGNC:9903]	GO:0000398:mRNA splicing, via spliceosome;GO:0006396:RNA processing;	GO:0005634:nucleus;	GO:0003677:DNA binding;GO:0003723:RNA binding;	K13094;K17985	-;ko04137 Mitophagy - animal;ko04140 Autophagy - animal;ko05010 Alzheimer disease;ko05014 Amyotrophic lateral sclerosis;ko05016 Huntington disease;ko05017 Spinocerebellar ataxia;ko05022 Pathways of neurodegeneration - multiple diseases;
ENSG00000004660	7433	431	3.91	603	4.06	627	3.82	466	3.59	454	4.02	414	3.54	480	3.76	423	3.71	495	3.9	448	3.55	562	4	485	3.86	734	4.77	605	4.61	644	4.82	17	3860315	3894891	-	CAMKK1	calcium/calmodulin dependent protein kinase kinase 1 [Source:HGNC Symbol%3BAcc:HGNC:1469]	GO:0035556:intracellular signal transduction;GO:0045860:positive regulation of protein kinase activity;	GO:0005737:cytoplasm;GO:0005829:cytosol;GO:0005654:nucleoplasm;	GO:0005524:ATP binding;GO:0005516:calmodulin binding;GO:0004683:calmodulin-dependent protein kinase activity;GO:0106310:protein serine kinase activity;GO:0004674:protein serine/threonine kinase activity;	K07359	;ko04140 Autophagy - animal;ko04152 AMPK signaling pathway;ko04211 Longevity regulating pathway;ko04920 Adipocytokine signaling pathway;ko04921 Oxytocin signaling pathway;ko04936 Alcoholic liver disease;ko05034 Alcoholism;
ENSG00000004700	3779	1330	23.76	1851	24.52	1912	22.94	1570	23.8	1295	22.54	1321	22.24	1469	22.62	1361	23.45	1429	22.16	1409	21.96	1635	22.87	1484	23.26	1880	24.03	1683	25.24	1717	25.28	12	21468910	21501669	-	RECQL	RecQ like helicase [Source:HGNC Symbol%3BAcc:HGNC:9948]	GO:0032508:DNA duplex unwinding;GO:0006310:DNA recombination;GO:0006281:DNA repair;GO:0006268:DNA unwinding involved in DNA replication;GO:0000724:double-strand break repair via homologous recombination;	GO:0005694:chromosome;GO:0005737:cytoplasm;GO:0016020:membrane;GO:0005654:nucleoplasm;GO:0005634:nucleus;	GO:0043138:3'-5' DNA helicase activity;GO:0036310:ATP-dependent DNA/DNA annealing activity;GO:0005524:ATP binding;GO:0140603:obsolete ATP hydrolysis activity;GO:0003677:DNA binding;GO:0003678:DNA helicase activity;GO:0009378:four-way junction helicase activity;	K10899	-
ENSG00000004766	9559	914	6.45	1214	6.36	1371	6.5	1232	7.38	1034	7.11	1054	7.02	1041	6.34	899	6.12	975	5.98	1169	7.2	1159	6.41	1101	6.82	1418	7.17	1182	7.01	988	5.75	7	93232340	93361123	+	VPS50	VPS50 subunit of EARP/GARPII complex [Source:HGNC Symbol%3BAcc:HGNC:25956]	GO:0032456:endocytic recycling;GO:0015031:protein transport;	GO:0005829:cytosol;GO:1990745:EARP complex;GO:0070062:extracellular exosome;GO:0016020:membrane;GO:0055037:recycling endosome;	GO:0000149:SNARE binding;	K17985	;ko04137 Mitophagy - animal;ko04140 Autophagy - animal;ko05010 Alzheimer disease;ko05014 Amyotrophic lateral sclerosis;ko05016 Huntington disease;ko05017 Spinocerebellar ataxia;ko05022 Pathways of neurodegeneration - multiple diseases;
ENSG00000004776	1724	2	0.08	0	0	1	0.03	2	0.07	1	0.04	2	0.07	2	0.07	2	0.08	0	0	1	0.03	2	0.06	2	0.07	1	0.03	0	0	3	0.1	19	35754566	35758079	-	HSPB6	heat shock protein family B (small) member 6 [Source:HGNC Symbol%3BAcc:HGNC:26511]	GO:0061077:chaperone-mediated protein folding;GO:0010667:negative regulation of cardiac muscle cell apoptotic process;GO:0045766:positive regulation of angiogenesis;GO:0006937:regulation of muscle contraction;	GO:0005737:cytoplasm;GO:0005829:cytosol;GO:0005576:extracellular region;GO:0005794:Golgi apparatus;GO:0005730:nucleolus;GO:0005634:nucleus;	GO:0051087:protein-folding chaperone binding;GO:0042803:protein homodimerization activity;GO:0005212:structural constituent of eye lens;GO:0051082:unfolded protein binding;	K09545	-
ENSG00000004777	5260	18	0.23	39	0.37	53	0.46	21	0.23	25	0.31	31	0.37	31	0.34	30	0.37	25	0.28	26	0.29	26	0.26	27	0.3	57	0.52	59	0.64	47	0.5	19	35774532	35788822	+	ARHGAP33	Rho GTPase activating protein 33 [Source:HGNC Symbol%3BAcc:HGNC:23085]	GO:0015031:protein transport;GO:0061001:regulation of dendritic spine morphogenesis;GO:0009636:response to toxic substance;GO:0007264:small GTPase mediated signal transduction;	GO:0005737:cytoplasm;GO:0005829:cytosol;GO:0043197:dendritic spine;GO:0005886:plasma membrane;GO:0032991:protein-containing complex;	GO:0005096:GTPase activator activity;GO:0035091:phosphatidylinositol binding;GO:0019901:protein kinase binding;	K17933	-
ENSG00000004779	1548	807	35.19	966	31.24	1127	33.01	851	31.49	721	30.63	743	30.54	829	31.16	643	27.05	750	28.39	798	30.37	856	29.23	899	34.4	971	30.3	846	30.97	870	31.27	16	23581014	23596316	-	NDUFAB1	NADH:ubiquinone oxidoreductase subunit AB1 [Source:HGNC Symbol%3BAcc:HGNC:7694]	GO:0006633:fatty acid biosynthetic process;GO:0006120:mitochondrial electron transport, NADH to ubiquinone;GO:0032981:mitochondrial respiratory chain complex I assembly;GO:0009249:protein lipoylation;	GO:0005743:mitochondrial inner membrane;GO:0005759:mitochondrial matrix;GO:0031966:mitochondrial membrane;GO:0005747:mitochondrial respiratory chain complex I;GO:0005739:mitochondrion;GO:0005654:nucleoplasm;	GO:0000035:acyl binding;GO:0000036:acyl carrier activity;GO:0005509:calcium ion binding;GO:0005504:fatty acid binding;	K03955	;ko00190 Oxidative phosphorylation;ko01100 Metabolic pathways;ko04714 Thermogenesis;ko04723 Retrograde endocannabinoid signaling;ko04932 Non-alcoholic fatty liver disease;ko05010 Alzheimer disease;ko05012 Parkinson disease;ko05014 Amyotrophic lateral sclerosis;ko05016 Huntington disease;ko05020 Prion disease;ko05022 Pathways of neurodegeneration - multiple diseases;ko05208 Chemical carcinogenesis…
ENSG00000004799	4544	2943	43.72	4374	48.19	4185	41.76	3394	42.78	3020	43.71	3028	42.4	3298	42.23	3033	43.47	3160	40.75	3246	42.08	3559	41.4	3255	42.43	4507	47.91	3970	49.51	4013	49.14	7	95583499	95596516	-	PDK4	pyruvate dehydrogenase kinase 4 [Source:HGNC Symbol%3BAcc:HGNC:8812]	GO:0071398:cellular response to fatty acid;GO:0009267:cellular response to starvation;GO:0042593:glucose homeostasis;GO:0006006:glucose metabolic process;GO:0008286:insulin receptor signaling pathway;GO:2000811:negative regulation of anoikis;GO:0006468:protein phosphorylation;GO:0072593:reactive oxygen species metabolic process;GO:0010510:regulation of acetyl-CoA biosynthetic process from pyruvat…	GO:0005759:mitochondrial matrix;GO:0005739:mitochondrion;	GO:0005524:ATP binding;GO:0004672:protein kinase activity;GO:0004740:pyruvate dehydrogenase (acetyl-transferring) kinase activity;	K00898	;ko05415 Diabetic cardiomyopathy;
ENSG00000004809	3907	0	0	0	0	0	0	1	0.01	0	0	0	0	0	0	0	0	1	0.01	0	0	0	0	0	0	0	0	0	0	0	0	6	110424687	110476641	-	SLC22A16	solute carrier family 22 member 16 [Source:HGNC Symbol%3BAcc:HGNC:20302]	GO:0046717:acid secretion;GO:0015879:carnitine transport;GO:0030154:cell differentiation;GO:0030317:flagellated sperm motility;GO:0015695:organic cation transport;GO:0007338:single fertilization;GO:0007283:spermatogenesis;	GO:0005829:cytosol;GO:0005886:plasma membrane;	GO:0005275:amine transmembrane transporter activity;GO:0015226:carnitine transmembrane transporter activity;GO:0015101:organic cation transmembrane transporter activity;	K08212	-
ENSG00000004838	2889	15	0.35	26	0.45	18	0.28	24	0.48	16	0.36	17	0.37	24	0.48	11	0.25	11	0.22	11	0.22	22	0.4	22	0.45	38	0.64	14	0.27	12	0.23	3	50341110	50345732	-	ZMYND10	zinc finger MYND-type containing 10 [Source:HGNC Symbol%3BAcc:HGNC:19412]	GO:0003341:cilium movement;GO:0036159:inner dynein arm assembly;GO:0044458:motile cilium assembly;GO:0036158:outer dynein arm assembly;GO:1905505:positive regulation of motile cilium assembly;GO:0061512:protein localization to cilium;	GO:0016324:apical plasma membrane;GO:0034451:centriolar satellite;GO:0005737:cytoplasm;GO:0120293:dynein axonemal particle;	GO:0046872:metal ion binding;GO:0060090:molecular adaptor activity;GO:0044183:protein folding chaperone;	-	-
ENSG00000004846	8796	7	0.05	13	0.07	8	0.04	5	0.03	4	0.03	5	0.04	9	0.06	8	0.06	4	0.03	6	0.04	8	0.05	12	0.08	3	0.02	8	0.05	3	0.02	7	20615667	20777038	+	ABCB5	ATP binding cassette subfamily B member 5 [Source:HGNC Symbol%3BAcc:HGNC:46]	GO:0030154:cell differentiation;GO:0001654:eye development;GO:0042391:regulation of membrane potential;GO:0055085:transmembrane transport;	GO:0005886:plasma membrane;	GO:0008559:ABC-type xenobiotic transporter activity;GO:0005524:ATP binding;GO:0042626:ATPase-coupled transmembrane transporter activity;GO:0015562:efflux transmembrane transporter activity;	K05660	;ko02010 ABC transporters;
ENSG00000004848	3114	0	0	1	0.02	0	0	0	0	0	0	0	0	0	0	0	0	0	0	1	0.02	0	0	0	0	0	0	0	0	0	0	X	25003694	25016420	-	ARX	aristaless related homeobox [Source:HGNC Symbol%3BAcc:HGNC:18060]	GO:0048484:enteric nervous system development;GO:0048666:neuron development;GO:0003322:pancreatic A cell development;GO:0006357:regulation of transcription by RNA polymerase II;GO:0021539:subthalamus development;GO:0021537:telencephalon development;GO:0021794:thalamus development;	GO:0005634:nucleus;	GO:0000981:DNA-binding transcription factor activity, RNA polymerase II-specific;GO:0000977:RNA polymerase II transcription regulatory region sequence-specific DNA binding;	K09452	-
ENSG00000004864	3710	1501	27.31	2050	27.66	2219	27.12	1625	25.09	1313	23.27	1412	24.22	1708	26.79	1451	25.47	1736	27.42	1775	28.18	1886	26.87	1712	27.33	1966	25.6	1734	26.49	1758	26.37	7	96120220	96322147	-	SLC25A13	solute carrier family 25 member 13 [Source:HGNC Symbol%3BAcc:HGNC:10983]	GO:0009066:aspartate family amino acid metabolic process;GO:0015810:aspartate transmembrane transport;GO:0006754:ATP biosynthetic process;GO:0045333:cellular respiration;GO:0006094:gluconeogenesis;GO:0015813:L-glutamate transmembrane transport;GO:0043490:malate-aspartate shuttle;GO:0006839:mitochondrial transport;GO:0051592:response to calcium ion;	GO:0005743:mitochondrial inner membrane;GO:0005739:mitochondrion;	GO:0015172:acidic amino acid transmembrane transporter activity;GO:0005509:calcium ion binding;GO:0042802:identical protein binding;GO:0015183:L-aspartate transmembrane transporter activity;GO:0005313:L-glutamate transmembrane transporter activity;GO:0022857:transmembrane transporter activity;	K15105	-
ENSG00000004866	6526	488	5.05	661	5.07	785	5.45	626	5.49	508	5.12	543	5.29	577	5.14	542	5.41	582	5.23	582	5.25	615	4.98	568	5.16	718	5.31	541	4.7	594	5.06	7	116953238	117230176	+	ST7	suppression of tumorigenicity 7 [Source:HGNC Symbol%3BAcc:HGNC:11351]	-	-	-	-	-
ENSG00000004897	6824	3146	31.12	4540	33.3	4759	31.62	3356	28.17	3165	30.5	3225	30.07	3594	30.65	3173	30.28	3463	29.74	3668	31.66	3816	29.56	3509	30.46	4350	30.79	3585	29.77	3651	29.77	17	47117703	47189422	-	CDC27	cell division cycle 27 [Source:HGNC Symbol%3BAcc:HGNC:1728]	GO:0031145:anaphase-promoting complex-dependent catabolic process;GO:0051301:cell division;GO:0007091:metaphase/anaphase transition of mitotic cell cycle;GO:0045842:positive regulation of mitotic metaphase/anaphase transition;GO:0070979:protein K11-linked ubiquitination;GO:0016567:protein ubiquitination;	GO:0005680:anaphase-promoting complex;GO:0005813:centrosome;GO:0005737:cytoplasm;GO:0005829:cytosol;GO:0072686:mitotic spindle;GO:0005654:nucleoplasm;GO:0005634:nucleus;GO:0005819:spindle;	GO:0019903:protein phosphatase binding;	K03350	;ko04110 Cell cycle;ko04114 Oocyte meiosis;ko04120 Ubiquitin mediated proteolysis;ko04914 Progesterone-mediated oocyte maturation;ko05166 Human T-cell leukemia virus 1 infection;
ENSG00000004939	5125	0	0	0	0	0	0	0	0	0	0	1	0.01	0	0	0	0	0	0	0	0	0	0	0	0	0	0	1	0.01	0	0	17	44248390	44268141	-	SLC4A1	solute carrier family 4 member 1 (Diego blood group) [Source:HGNC Symbol%3BAcc:HGNC:11027]	GO:0006820:monoatomic anion transport;GO:0015701:bicarbonate transport;GO:0007596:blood coagulation;GO:0006873:intracellular monoatomic ion homeostasis;GO:0006821:chloride transport;GO:0048821:erythrocyte development;GO:0050801:monoatomic ion homeostasis;GO:1904539:negative regulation of glycolytic process through fructose-6-phosphate;GO:0051354:negative regulation of oxidoreductase activity;GO:0…	GO:0016323:basolateral plasma membrane;GO:0072562:blood microparticle;GO:0030863:cortical cytoskeleton;GO:0009898:cytoplasmic side of plasma membrane;GO:0070062:extracellular exosome;GO:0005886:plasma membrane;GO:0030018:Z disc;	GO:0008509:monoatomic anion transmembrane transporter activity;GO:0015301:obsolete anion:anion antiporter activity;GO:0030506:ankyrin binding;GO:0015106:bicarbonate transmembrane transporter activity;GO:0015108:chloride transmembrane transporter activity;GO:0030492:hemoglobin binding;GO:0005452:solute:inorganic anion antiporter activity;GO:0042803:protein homodimerization activity;GO:0043495:prot…	K06573	;ko04966 Collecting duct acid secretion;
ENSG00000004948	4222	1	0.02	4	0.05	2	0.02	3	0.04	3	0.05	3	0.05	2	0.03	1	0.02	0	0	4	0.06	2	0.03	3	0.04	7	0.08	1	0.01	4	0.05	7	93424486	93574730	-	CALCR	calcitonin receptor [Source:HGNC Symbol%3BAcc:HGNC:1440]	GO:0007189:adenylate cyclase-activating G protein-coupled receptor signaling pathway;GO:0007188:adenylate cyclase-modulating G protein-coupled receptor signaling pathway;GO:0097647:amylin receptor signaling pathway;GO:0007166:cell surface receptor signaling pathway;GO:0038041:cross-receptor inhibition within G protein-coupled receptor heterodimer;GO:0045762:positive regulation of adenylate cyclas…	GO:0150056:amylin receptor complex 1;GO:0150057:amylin receptor complex 2;GO:0150058:amylin receptor complex 3;GO:0030424:axon;GO:0005886:plasma membrane;	GO:0097643:amylin receptor activity;GO:0001540:amyloid-beta binding;GO:0032841:calcitonin binding;GO:0001635:calcitonin gene-related peptide receptor activity;GO:0004948:calcitonin receptor activity;GO:0008528:G protein-coupled peptide receptor activity;	K04576	;ko04080 Neuroactive ligand-receptor interaction;ko04380 Osteoclast differentiation;
ENSG00000004961	2343	835	24.06	1195	25.53	1304	25.23	1097	26.82	925	25.96	952	25.85	1064	26.42	922	25.63	1124	28.11	1111	27.93	1211	27.32	1011	25.56	1197	24.68	807	19.52	1021	24.25	X	11111301	11123086	+	HCCS	holocytochrome c synthase [Source:HGNC Symbol%3BAcc:HGNC:4837]	GO:0009887:animal organ morphogenesis;GO:0018063:cytochrome c-heme linkage;	GO:0016020:membrane;GO:0005743:mitochondrial inner membrane;GO:0005739:mitochondrion;	GO:0020037:heme binding;GO:0004408:holocytochrome-c synthase activity;GO:0046872:metal ion binding;	K01764	;ko00860 Porphyrin metabolism;ko01100 Metabolic pathways;
ENSG00000004975	5321	593	7.52	741	6.97	909	7.75	644	6.93	624	7.71	645	7.71	658	7.2	621	7.6	703	7.74	679	7.52	746	7.41	664	7.39	837	7.6	709	7.55	660	6.9	17	7225342	7234517	-	DVL2	dishevelled segment polarity protein 2 [Source:HGNC Symbol%3BAcc:HGNC:3086]	GO:0060070:canonical Wnt signaling pathway;GO:0044340:canonical Wnt signaling pathway involved in regulation of cell proliferation;GO:0090103:cochlea morphogenesis;GO:0022007:convergent extension involved in neural plate elongation;GO:0007507:heart development;GO:0035556:intracellular signal transduction;GO:0001843:neural tube closure;GO:0035567:non-canonical Wnt signaling pathway;GO:0003151:outf…	GO:0016235:aggresome;GO:0045177:apical part of cell;GO:0045334:clathrin-coated endocytic vesicle;GO:0005737:cytoplasm;GO:0031410:cytoplasmic vesicle;GO:0005829:cytosol;GO:0016328:lateral plasma membrane;GO:0016604:nuclear body;GO:0005654:nucleoplasm;GO:0005634:nucleus;GO:0005938:cell cortex;GO:0030136:clathrin-coated vesicle;GO:0005856:cytoskeleton;GO:0005886:plasma membrane;	GO:0005109:frizzled binding;GO:0042802:identical protein binding;GO:0019904:protein domain specific binding;GO:0019901:protein kinase binding;GO:0043621:protein self-association;GO:0030674:protein-macromolecule adaptor activity;GO:0031267:small GTPase binding;GO:0008013:beta-catenin binding;	K02353	;ko04150 mTOR signaling pathway;ko04310 Wnt signaling pathway;ko04330 Notch signaling pathway;ko04390 Hippo signaling pathway;ko04550 Signaling pathways regulating pluripotency of stem cells;ko04916 Melanogenesis;ko04934 Cushing syndrome;ko05010 Alzheimer disease;ko05022 Pathways of neurodegeneration - multiple diseases;ko05165 Human papillomavirus infection;ko05200 Pathways in cancer;ko05217 Bas…
ENSG00000005001	2384	0	0	0	0	0	0	0	0	0	0	0	0	0	0	0	0	0	0	0	0	1	0.02	0	0	0	0	0	0	0	0	16	2852730	2858170	-	PRSS22	serine protease 22 [Source:HGNC Symbol%3BAcc:HGNC:14368]	GO:0010952:positive regulation of peptidase activity;GO:0006508:proteolysis;	GO:0005615:extracellular space;	GO:0016504:peptidase activator activity;GO:0004252:serine-type endopeptidase activity;	K09626	-
ENSG00000005007	8573	906	7.13	1196	6.98	1458	7.71	1111	7.42	1016	7.79	1070	7.94	1244	8.44	1031	7.83	1248	8.53	1099	7.55	1312	8.09	1160	8.01	1294	7.29	1121	7.41	1148	7.45	19	18831959	18868230	+	UPF1	UPF1 RNA helicase and ATPase [Source:HGNC Symbol%3BAcc:HGNC:9962]	GO:0061158:3'-UTR-mediated mRNA destabilization;GO:0044770:cell cycle phase transition;GO:0071347:cellular response to interleukin-1;GO:0071222:cellular response to lipopolysaccharide;GO:0006281:DNA repair;GO:0006260:DNA replication;GO:0009048:dosage compensation by inactivation of X chromosome;GO:0071044:histone mRNA catabolic process;GO:0006406:mRNA export from nucleus;GO:0000956:nuclear-transc…	GO:0000785:chromatin;GO:0000781:chromosome, telomeric region;GO:0005737:cytoplasm;GO:0005829:cytosol;GO:0035145:exon-exon junction complex;GO:0005654:nucleoplasm;GO:0005634:nucleus;GO:0000932:P-body;GO:0044530:supraspliceosomal complex;GO:0048471:perinuclear region of cytoplasm;	GO:0005524:ATP binding;GO:0003682:chromatin binding;GO:0004386:helicase activity;GO:0016787:hydrolase activity;GO:0003723:RNA binding;GO:0003724:RNA helicase activity;GO:0042162:telomeric DNA binding;GO:0008270:zinc ion binding;	K14326	;ko03013 Nucleocytoplasmic transport;ko03015 mRNA surveillance pathway;
ENSG00000005020	5361	480	6.04	613	5.72	677	5.73	492	5.26	474	5.81	467	5.54	548	5.95	448	5.44	473	5.17	536	5.89	558	5.5	535	5.91	778	7.01	596	6.3	534	5.54	7	26667068	26995239	-	SKAP2	src kinase associated phosphoprotein 2 [Source:HGNC Symbol%3BAcc:HGNC:15687]	GO:0042113:B cell activation;GO:0008285:negative regulation of cell population proliferation;GO:0065003:protein-containing complex assembly;GO:0007165:signal transduction;	GO:0005737:cytoplasm;GO:0005829:cytosol;GO:0005654:nucleoplasm;GO:0005886:plasma membrane;	-	K16467	-
ENSG00000005022	1555	3704	160.8	4899	157.71	5354	156.11	3763	138.6	3231	136.64	3472	142.06	4314	161.43	3551	148.72	4184	157.66	3898	147.67	4325	147.01	4016	152.97	5034	156.36	4035	147.04	4304	154.01	X	119468422	119471396	+	SLC25A5	solute carrier family 25 member 5 [Source:HGNC Symbol%3BAcc:HGNC:10991]	GO:1990845:adaptive thermogenesis;GO:0051503:adenine nucleotide transport;GO:0030183:B cell differentiation;GO:1990830:cellular response to leukemia inhibitory factor;GO:0007059:chromosome segregation;GO:0030218:erythrocyte differentiation;GO:0140021:mitochondrial ADP transmembrane transport;GO:1990544:mitochondrial ATP transmembrane transport;GO:1901029:negative regulation of mitochondrial outer…	GO:0016020:membrane;GO:0045121:membrane raft;GO:0005743:mitochondrial inner membrane;GO:0042645:mitochondrial nucleoid;GO:0005757:mitochondrial permeability transition pore complex;GO:0005739:mitochondrion;GO:0071817:MMXD complex;GO:0005634:nucleus;	GO:0000295:adenine nucleotide transmembrane transporter activity;GO:0015207:adenine transmembrane transporter activity;GO:0005471:ATP:ADP antiporter activity;GO:0017077:oxidative phosphorylation uncoupler activity;GO:0015078:proton transmembrane transporter activity;GO:0003723:RNA binding;GO:0031625:ubiquitin protein ligase binding;	K05863	;ko04020 Calcium signaling pathway;ko04022 cGMP-PKG signaling pathway;ko04217 Necroptosis;ko04218 Cellular senescence;ko04613 Neutrophil extracellular trap formation;ko05010 Alzheimer disease;ko05012 Parkinson disease;ko05016 Huntington disease;ko05017 Spinocerebellar ataxia;ko05020 Prion disease;ko05022 Pathways of neurodegeneration - multiple diseases;ko05164 Influenza A;ko05166 Human T-cell le…
ENSG00000005059	3555	268	5.09	403	5.67	399	5.09	258	4.16	266	4.92	239	4.28	302	4.94	289	5.29	316	5.21	280	4.64	331	4.92	307	5.12	387	5.26	366	5.83	347	5.43	4	109560209	109688719	+	MCUB	mitochondrial calcium uniporter dominant negative subunit beta [Source:HGNC Symbol%3BAcc:HGNC:26076]	GO:0036444:calcium import into the mitochondrion;GO:0051560:mitochondrial calcium ion homeostasis;GO:0006851:mitochondrial calcium ion transmembrane transport;	GO:0034704:calcium channel complex;GO:0031305:obsolete integral component of mitochondrial inner membrane;GO:0043231:intracellular membrane-bounded organelle;GO:0031224:obsolete intrinsic component of membrane;GO:0005743:mitochondrial inner membrane;GO:0005739:mitochondrion;GO:0005654:nucleoplasm;GO:1990246:uniplex complex;	GO:0019855:calcium channel inhibitor activity;	-	-
ENSG00000005073	2669	368	9.31	483	9.06	531	9.02	392	8.41	390	9.61	397	9.46	445	9.7	369	9	460	10.1	455	10.04	486	9.62	414	9.19	515	9.32	465	9.87	422	8.8	7	27181157	27185232	-	HOXA11	homeobox A11 [Source:HGNC Symbol%3BAcc:HGNC:5101]	GO:0048856:anatomical structure development;GO:0009653:anatomical structure morphogenesis;GO:0009952:anterior/posterior pattern specification;GO:0001658:branching involved in ureteric bud morphogenesis;GO:0060351:cartilage development involved in endochondral bone morphogenesis;GO:0048589:developmental growth;GO:0009953:dorsal/ventral pattern formation;GO:0042733:embryonic digit morphogenesis;GO:…	GO:0005654:nucleoplasm;GO:0005634:nucleus;GO:0032991:protein-containing complex;GO:0032993:protein-DNA complex;GO:0005667:transcription regulator complex;	GO:0000981:DNA-binding transcription factor activity, RNA polymerase II-specific;GO:0000978:RNA polymerase II cis-regulatory region sequence-specific DNA binding;GO:1990837:sequence-specific double-stranded DNA binding;	K09296	-
ENSG00000005075	937	329	23.7	396	21.16	475	22.99	313	19.13	343	24.07	323	21.93	381	23.66	296	20.57	420	26.26	340	21.38	393	22.17	375	23.7	424	21.86	346	20.93	368	21.85	7	102473128	102478922	-	POLR2J	RNA polymerase II subunit J [Source:HGNC Symbol%3BAcc:HGNC:9197]	GO:0006366:transcription by RNA polymerase II;	GO:0005654:nucleoplasm;GO:0005634:nucleus;GO:0005665:RNA polymerase II, core complex;	GO:0003677:DNA binding;GO:0003899:DNA-directed 5'-3' RNA polymerase activity;GO:0030275:LRR domain binding;GO:0046983:protein dimerization activity;GO:0001055:RNA polymerase II activity;	K03008	;ko03020 RNA polymerase;ko03420 Nucleotide excision repair;ko05016 Huntington disease;
ENSG00000005100	5789	1587	18.51	2259	19.53	2360	18.48	1856	18.36	1628	18.49	1632	17.94	1817	18.26	1605	18.06	1711	17.32	1861	18.94	2098	19.16	1803	18.45	2114	17.64	1796	17.58	1992	19.15	17	5440917	5468982	-	DHX33	DEAH-box helicase 33 [Source:HGNC Symbol%3BAcc:HGNC:16718]	GO:0043410:positive regulation of MAPK cascade;GO:0051092:positive regulation of NF-kappaB transcription factor activity;GO:1900227:positive regulation of NLRP3 inflammasome complex assembly;GO:0045943:positive regulation of transcription by RNA polymerase I;GO:0032481:positive regulation of type I interferon production;GO:0006413:translational initiation;	GO:0005737:cytoplasm;GO:0072559:NLRP3 inflammasome complex;GO:0005730:nucleolus;GO:0005654:nucleoplasm;GO:0005634:nucleus;	GO:0005524:ATP binding;GO:0140603:obsolete ATP hydrolysis activity;GO:0140297:DNA-binding transcription factor binding;GO:0003725:double-stranded RNA binding;GO:0003729:mRNA binding;GO:0000182:rDNA binding;GO:0043023:ribosomal large subunit binding;GO:0003723:RNA binding;GO:0003724:RNA helicase activity;	K17820	;ko04621 NOD-like receptor signaling pathway;
ENSG00000005102	2674	36	0.91	51	0.95	43	0.73	38	0.81	45	1.11	40	0.95	52	1.13	33	0.8	47	1.03	25	0.55	34	0.67	26	0.58	73	1.32	67	1.42	65	1.35	17	43640389	43661922	-	MEOX1	mesenchyme homeobox 1 [Source:HGNC Symbol%3BAcc:HGNC:7013]	GO:0060218:hematopoietic stem cell differentiation;GO:0007275:multicellular organism development;GO:0006357:regulation of transcription by RNA polymerase II;GO:0061056:sclerotome development;GO:0061053:somite development;GO:0001757:somite specification;	GO:0000785:chromatin;GO:0005737:cytoplasm;GO:0005634:nucleus;	GO:0003682:chromatin binding;GO:0001228:DNA-binding transcription activator activity, RNA polymerase II-specific;GO:0003700:DNA-binding transcription factor activity;GO:0000981:DNA-binding transcription factor activity, RNA polymerase II-specific;GO:0071837:HMG box domain binding;GO:0000978:RNA polymerase II cis-regulatory region sequence-specific DNA binding;GO:0043565:sequence-specific DNA bind…	K09322	-
ENSG00000005108	10915	5	0.03	8	0.04	6	0.02	11	0.06	3	0.02	2	0.01	3	0.02	4	0.02	7	0.04	8	0.04	1	0	1	0.01	15	0.07	5	0.03	12	0.06	7	11370365	11832198	-	THSD7A	thrombospondin type 1 domain containing 7A [Source:HGNC Symbol%3BAcc:HGNC:22207]	GO:0031532:obsolete actin cytoskeleton reorganization;GO:0001525:angiogenesis;GO:0030154:cell differentiation;	GO:0042995:cell projection;GO:0005576:extracellular region;GO:0005886:plasma membrane;	-	-	-
ENSG00000005156	12901	466	2.44	646	2.51	708	2.49	562	2.5	439	2.24	492	2.43	533	2.4	497	2.51	572	2.6	528	2.41	631	2.59	552	2.53	638	2.39	568	2.49	544	2.35	17	34980512	35009743	+	LIG3	DNA ligase 3 [Source:HGNC Symbol%3BAcc:HGNC:6600]	GO:0006288:base-excision repair, DNA ligation;GO:0006287:base-excision repair, gap-filling;GO:0007049:cell cycle;GO:0051301:cell division;GO:0071897:DNA biosynthetic process;GO:0006266:DNA ligation;GO:0006302:double-strand break repair;GO:0097681:double-strand break repair via alternative nonhomologous end joining;GO:0000724:double-strand break repair via homologous recombination;GO:0006273:laggi…	GO:0005737:cytoplasm;GO:0070421:DNA ligase III-XRCC1 complex;GO:0005739:mitochondrion;GO:0005654:nucleoplasm;GO:0005634:nucleus;	GO:0005524:ATP binding;GO:0003677:DNA binding;GO:0003910:DNA ligase (ATP) activity;GO:0003909:DNA ligase activity;GO:0008270:zinc ion binding;	K10776	;ko03410 Base excision repair;
ENSG00000005175	5350	1188	14.99	1582	14.8	1718	14.56	1350	14.45	1129	13.88	1352	16.08	1275	13.87	1137	13.84	1288	14.11	1418	15.61	1459	14.41	1416	15.68	1428	12.89	1218	12.9	1264	13.15	12	47661249	47706030	-	RPAP3	RNA polymerase II associated protein 3 [Source:HGNC Symbol%3BAcc:HGNC:26151]	-	GO:0005829:cytosol;GO:0097255:R2TP complex;	-	K04135	;ko04020 Calcium signaling pathway;ko04022 cGMP-PKG signaling pathway;ko04080 Neuroactive ligand-receptor interaction;ko04152 AMPK signaling pathway;ko04261 Adrenergic signaling in cardiomyocytes;ko04270 Vascular smooth muscle contraction;ko04970 Salivary secretion;
ENSG00000005187	7510	1	0.01	0	0	0	0	2	0.02	0	0	0	0	2	0.02	8	0.07	3	0.02	5	0.04	2	0.01	2	0.02	5	0.03	2	0.02	5	0.04	16	20610243	20797581	+	ACSM3	acyl-CoA synthetase medium chain family member 3 [Source:HGNC Symbol%3BAcc:HGNC:10522]	GO:0006637:acyl-CoA metabolic process;GO:0006633:fatty acid biosynthetic process;GO:0042632:cholesterol homeostasis;GO:0008217:regulation of blood pressure;	GO:0005759:mitochondrial matrix;GO:0005739:mitochondrion;	GO:0005524:ATP binding;GO:0047760:butyrate-CoA ligase activity;GO:0015645:fatty acid ligase activity;GO:0004321:fatty-acyl-CoA synthase activity;GO:0046872:metal ion binding;GO:0043759:methylbutanoate-CoA ligase activity;GO:0018729:propionate CoA-transferase activity;GO:0050218:propionate-CoA ligase activity;	K01896	;ko00650 Butanoate metabolism;ko01100 Metabolic pathways;
ENSG00000005189	4111	243	3.99	395	4.81	389	4.29	233	3.25	274	4.38	263	4.07	301	4.26	293	4.64	273	3.89	244	3.5	306	3.93	221	3.18	451	5.3	379	5.22	419	5.67	16	20806429	20849665	+	REXO5	RNA exonuclease 5 [Source:HGNC Symbol%3BAcc:HGNC:24661]	-	GO:0070062:extracellular exosome;GO:0005730:nucleolus;GO:0005634:nucleus;	GO:0004527:exonuclease activity;GO:0003723:RNA binding;	K14570	;ko03008 Ribosome biogenesis in eukaryotes;
ENSG00000005194	3383	1035	20.65	1416	20.95	1544	20.69	1238	20.96	1073	20.86	1003	18.86	1170	20.12	1030	19.83	1193	20.66	1091	19	1289	20.14	1158	20.27	1333	19.03	1211	20.28	1249	20.54	16	57428187	57447420	-	CIAPIN1	cytokine induced apoptosis inhibitor 1 [Source:HGNC Symbol%3BAcc:HGNC:28050]	GO:0006915:apoptotic process;GO:0030097:hemopoiesis;GO:0016226:iron-sulfur cluster assembly;GO:0043066:negative regulation of apoptotic process;	GO:0005737:cytoplasm;GO:0005758:mitochondrial intermembrane space;GO:0005739:mitochondrion;GO:0005730:nucleolus;GO:0005654:nucleoplasm;GO:0005634:nucleus;	GO:0051537:2 iron, 2 sulfur cluster binding;GO:0051539:4 iron, 4 sulfur cluster binding;GO:0009055:electron transfer activity;GO:0046872:metal ion binding;GO:0008168:methyltransferase activity;	-	-
ENSG00000005206	7419	282	2.57	392	2.64	404	2.47	313	2.42	273	2.42	326	2.8	279	2.19	276	2.42	294	2.32	284	2.25	328	2.34	278	2.22	398	2.59	351	2.68	383	2.87	19	2328615	2355095	+	SPPL2B	signal peptide peptidase like 2B [Source:HGNC Symbol%3BAcc:HGNC:30627]	GO:0006509:membrane protein ectodomain proteolysis;GO:0031293:membrane protein intracellular domain proteolysis;GO:0033619:membrane protein proteolysis;GO:0050776:regulation of immune response;GO:0010803:regulation of tumor necrosis factor-mediated signaling pathway;	GO:0015629:actin cytoskeleton;GO:0005813:centrosome;GO:0010008:endosome membrane;GO:0000139:Golgi membrane;GO:0030660:Golgi-associated vesicle membrane;GO:0071458:obsolete integral component of cytoplasmic side of endoplasmic reticulum membrane;GO:0071556:obsolete integral component of lumenal side of endoplasmic reticulum membrane;GO:0005765:lysosomal membrane;GO:0016020:membrane;GO:0005654:nucl…	GO:0042500:aspartic endopeptidase activity, intramembrane cleaving;GO:0042803:protein homodimerization activity;	K09597	-
ENSG00000005238	6375	90	0.95	128	1.01	153	1.09	109	0.98	93	0.96	103	1.03	93	0.85	67	0.68	83	0.76	103	0.95	115	0.95	71	0.66	107	0.81	105	0.93	109	0.95	9	35104112	35116341	-	FAM214B	family with sequence similarity 214 member B [Source:HGNC Symbol%3BAcc:HGNC:25666]	-	GO:0005634:nucleus;	-	-	-
ENSG00000005243	1866	212	7.67	268	7.19	337	8.19	281	8.63	266	9.37	226	7.71	294	9.17	271	9.46	242	7.6	281	8.87	297	8.41	244	7.75	421	10.9	357	10.84	278	8.29	17	48026167	48038030	-	COPZ2	COPI coat complex subunit zeta 2 [Source:HGNC Symbol%3BAcc:HGNC:19356]	GO:0006891:intra-Golgi vesicle-mediated transport;GO:0006886:intracellular protein transport;GO:0006890:retrograde vesicle-mediated transport, Golgi to endoplasmic reticulum;	GO:0005801:cis-Golgi network;GO:0030126:COPI vesicle coat;GO:0005829:cytosol;GO:0005789:endoplasmic reticulum membrane;GO:0033116:endoplasmic reticulum-Golgi intermediate compartment membrane;GO:0000139:Golgi membrane;GO:0030133:transport vesicle;	-	-	-
ENSG00000005249	4262	180	2.85	244	2.87	233	2.48	200	2.69	162	2.5	174	2.6	197	2.69	199	3.04	224	3.08	248	3.43	206	2.55	197	2.74	276	3.13	239	3.18	257	3.36	7	107044705	107161811	+	PRKAR2B	protein kinase cAMP-dependent type II regulatory subunit beta [Source:HGNC Symbol%3BAcc:HGNC:9392]	GO:0006631:fatty acid metabolic process;GO:0035556:intracellular signal transduction;GO:0007612:learning;GO:0050804:modulation of chemical synaptic transmission;GO:2000480:negative regulation of cAMP-dependent protein kinase activity;GO:0043949:regulation of cAMP-mediated signaling;GO:0010738:regulation of protein kinase A signaling;GO:0097332:response to antipsychotic drug;GO:0097338:response to…	GO:0005952:cAMP-dependent protein kinase complex;GO:0005813:centrosome;GO:0097546:ciliary base;GO:0005737:cytoplasm;GO:0005829:cytosol;GO:0043198:dendritic shaft;GO:0043197:dendritic spine;GO:0070062:extracellular exosome;GO:0098978:glutamatergic synapse;GO:0045121:membrane raft;GO:0043025:neuronal cell body;GO:0048471:perinuclear region of cytoplasm;GO:0005886:plasma membrane;	GO:0030552:cAMP binding;GO:0004862:cAMP-dependent protein kinase inhibitor activity;GO:0008603:cAMP-dependent protein kinase regulator activity;GO:0019904:protein domain specific binding;GO:0034236:protein kinase A catalytic subunit binding;GO:0031625:ubiquitin protein ligase binding;	K04739	;ko04910 Insulin signaling pathway;
ENSG00000005302	9780	588	4.06	745	3.81	894	4.14	709	4.15	669	4.5	644	4.19	628	3.74	627	4.18	688	4.12	694	4.18	725	3.92	686	4.15	811	4.01	754	4.37	675	3.84	X	11758159	11775772	+	MSL3	MSL complex subunit 3 [Source:HGNC Symbol%3BAcc:HGNC:7370]	GO:0016573:histone acetylation;GO:0016575:histone deacetylation;GO:0043968:histone H2A acetylation;GO:0043967:histone H4 acetylation;GO:0043984:histone H4-K16 acetylation;GO:0006355:regulation of DNA-templated transcription;	GO:0000123:histone acetyltransferase complex;GO:0072487:MSL complex;GO:0035267:NuA4 histone acetyltransferase complex;GO:0005654:nucleoplasm;GO:0005634:nucleus;	GO:0003677:DNA binding;GO:0046972:histone H4K16 acetyltransferase activity;GO:0035064:methylated histone binding;	K18403	-
ENSG00000005339	15479	1992	8.69	2556	8.27	2882	8.44	2442	9.04	1966	8.35	2037	8.37	2300	8.65	2094	8.81	2498	9.46	2288	8.71	2503	8.55	2263	8.66	2567	8.01	2062	7.55	2218	7.97	16	3725054	3880713	-	CREBBP	CREB binding protein [Source:HGNC Symbol%3BAcc:HGNC:2348]	GO:0034644:cellular response to UV;GO:0042733:embryonic digit morphogenesis;GO:0016573:histone acetylation;GO:1990258:histone glutamine methylation;GO:0042592:homeostatic process;GO:0018076:N-terminal peptidyl-lysine acetylation;GO:0000122:negative regulation of transcription by RNA polymerase II;GO:0045944:positive regulation of transcription by RNA polymerase II;GO:0045893:positive regulation o…	GO:0000785:chromatin;GO:0005737:cytoplasm;GO:0000123:histone acetyltransferase complex;GO:0016604:nuclear body;GO:0005654:nucleoplasm;GO:0005634:nucleus;GO:0005667:transcription regulator complex;GO:0000940:outer kinetochore;GO:0032991:protein-containing complex;GO:0090575:RNA polymerase II transcription regulator complex;	GO:0016407:acetyltransferase activity;GO:0003682:chromatin binding;GO:0031490:chromatin DNA binding;GO:0003684:damaged DNA binding;GO:0004402:histone acetyltransferase activity;GO:0043426:MRF binding;GO:0002039:p53 binding;GO:0034212:peptide N-acetyltransferase activity;GO:0061733:peptide-lysine-N-acetyltransferase activity;GO:0061629:RNA polymerase II-specific DNA-binding transcription factor bi…	K04498	;ko03083 Polycomb repressive complex;ko03250 Viral life cycle - HIV-1;ko04024 cAMP signaling pathway;ko04066 HIF-1 signaling pathway;ko04068 FoxO signaling pathway;ko04110 Cell cycle;ko04310 Wnt signaling pathway;ko04330 Notch signaling pathway;ko04350 TGF-beta signaling pathway;ko04520 Adherens junction;ko04630 JAK-STAT signaling pathway;ko04720 Long-term potentiation;ko04916 Melanogenesis;ko049…
ENSG00000005379	11389	8	0.05	16	0.07	20	0.08	19	0.1	12	0.07	17	0.09	17	0.09	15	0.09	11	0.06	3	0.02	19	0.09	19	0.1	24	0.1	23	0.11	23	0.11	17	58301228	58328795	-	TSPOAP1	TSPO associated protein 1 [Source:HGNC Symbol%3BAcc:HGNC:16831]	-	GO:0044305:calyx of Held;GO:0005737:cytoplasm;GO:0005829:cytosol;GO:0098978:glutamatergic synapse;GO:0005739:mitochondrion;	GO:0030156:benzodiazepine receptor binding;GO:0099626:voltage-gated calcium channel activity involved in regulation of presynaptic cytosolic calcium levels;	K13194	-
ENSG00000005381	4427	0	0	0	0	0	0	0	0	0	0	0	0	0	0	0	0	0	0	0	0	0	0	0	0	0	0	0	0	0	0	17	58269855	58280935	-	MPO	myeloperoxidase [Source:HGNC Symbol%3BAcc:HGNC:7218]	GO:0007568:obsolete aging;GO:0006952:defense response;GO:0042742:defense response to bacterium;GO:0050832:defense response to fungus;GO:0042744:hydrogen peroxide catabolic process;GO:0002149:hypochlorous acid biosynthetic process;GO:0034374:low-density lipoprotein particle remodeling;GO:0043066:negative regulation of apoptotic process;GO:0019430:removal of superoxide radicals;GO:0002679:respirato…	GO:0042582:azurophil granule;GO:0035578:azurophil granule lumen;GO:0070062:extracellular exosome;GO:0005576:extracellular region;GO:0005615:extracellular space;GO:0043231:intracellular membrane-bounded organelle;GO:0005764:lysosome;GO:0005654:nucleoplasm;GO:0005634:nucleus;GO:0097013:phagocytic vesicle lumen;GO:0030141:secretory granule;	GO:0003682:chromatin binding;GO:0020037:heme binding;GO:0008201:heparin binding;GO:0046872:metal ion binding;GO:0004601:peroxidase activity;	K10789	;ko00983 Drug metabolism - other enzymes;ko04145 Phagosome;ko04613 Neutrophil extracellular trap formation;ko05202 Transcriptional misregulation in cancer;ko05221 Acute myeloid leukemia;
ENSG00000005421	2657	6	0.15	3	0.06	5	0.09	6	0.13	3	0.07	1	0.02	0	0	8	0.2	4	0.09	4	0.09	2	0.04	3	0.07	3	0.05	2	0.04	7	0.15	7	95297676	95324532	-	PON1	paraoxonase 1 [Source:HGNC Symbol%3BAcc:HGNC:9204]	GO:0019439:aromatic compound catabolic process;GO:0046395:carboxylic acid catabolic process;GO:0008203:cholesterol metabolic process;GO:0046434:organophosphate catabolic process;GO:0046470:phosphatidylcholine metabolic process;GO:0051099:positive regulation of binding;GO:0010875:positive regulation of cholesterol efflux;GO:0032411:positive regulation of transporter activity;GO:0070542:response to…	GO:0072562:blood microparticle;GO:0070062:extracellular exosome;GO:0005576:extracellular region;GO:0005615:extracellular space;GO:0034364:high-density lipoprotein particle;GO:0043231:intracellular membrane-bounded organelle;GO:0034366:spherical high-density lipoprotein particle;	GO:0102007:acyl-L-homoserine-lactone lactonohydrolase activity;GO:0004063:aryldialkylphosphatase activity;GO:0004064:arylesterase activity;GO:0005509:calcium ion binding;GO:0005543:phospholipid binding;GO:0042803:protein homodimerization activity;	K01045	-
ENSG00000005436	5462	357	4.41	568	5.21	591	4.91	406	4.26	439	5.29	408	4.75	455	4.85	416	4.96	483	5.18	488	5.26	502	4.86	402	4.36	615	5.44	497	5.16	506	5.15	2	75652000	75710985	-	GCFC2	GC-rich sequence DNA-binding factor 2 [Source:HGNC Symbol%3BAcc:HGNC:1317]	GO:0000398:mRNA splicing, via spliceosome;GO:0045892:negative regulation of DNA-templated transcription;GO:0006355:regulation of DNA-templated transcription;GO:0000245:spliceosomal complex assembly;	GO:0005829:cytosol;GO:0005730:nucleolus;GO:0005654:nucleoplasm;GO:0005634:nucleus;GO:0071008:U2-type post-mRNA release spliceosomal complex;	GO:0003677:DNA binding;	K09061	-
ENSG00000005448	2852	175	4.14	243	4.27	262	4.17	171	3.43	187	4.31	195	4.35	167	3.41	193	4.41	162	3.33	190	3.92	216	4	212	4.4	281	4.76	214	4.25	259	5.05	2	74421678	74425755	+	WDR54	WD repeat domain 54 [Source:HGNC Symbol%3BAcc:HGNC:25770]	GO:0002091:negative regulation of receptor internalization;GO:0042058:regulation of epidermal growth factor receptor signaling pathway;GO:0043408:regulation of MAPK cascade;	GO:0031982:vesicle;	GO:0042803:protein homodimerization activity;	K16467;K17985	-;ko04137 Mitophagy - animal;ko04140 Autophagy - animal;ko05010 Alzheimer disease;ko05014 Amyotrophic lateral sclerosis;ko05016 Huntington disease;ko05017 Spinocerebellar ataxia;ko05022 Pathways of neurodegeneration - multiple diseases;
ENSG00000005469	4995	206	2.78	270	2.71	308	2.8	242	2.77	217	2.86	233	2.97	183	2.13	201	2.62	219	2.57	238	2.81	257	2.72	237	2.81	276	2.67	233	2.64	276	3.07	7	87345664	87399794	+	CROT	carnitine O-octanoyltransferase [Source:HGNC Symbol%3BAcc:HGNC:2366]	GO:0009437:carnitine metabolic process;GO:0015936:coenzyme A metabolic process;GO:0006635:fatty acid beta-oxidation;GO:0033540:fatty acid beta-oxidation using acyl-CoA oxidase;GO:0006631:fatty acid metabolic process;GO:0015908:fatty acid transport;GO:0006091:generation of precursor metabolites and energy;GO:0051791:medium-chain fatty acid metabolic process;	GO:0005829:cytosol;GO:0043231:intracellular membrane-bounded organelle;GO:0005782:peroxisomal matrix;GO:0005777:peroxisome;	GO:0008458:carnitine O-octanoyltransferase activity;	K05940	;ko04146 Peroxisome;
ENSG00000005471	7728	0	0	2	0.01	8	0.05	5	0.04	4	0.03	2	0.02	1	0.01	3	0.03	6	0.05	1	0.01	1	0.01	1	0.01	3	0.02	3	0.02	4	0.03	7	87401696	87480435	-	ABCB4	ATP binding cassette subfamily B member 4 [Source:HGNC Symbol%3BAcc:HGNC:45]	GO:0032782:bile acid secretion;GO:1903413:cellular response to bile acid;GO:0099040:ceramide translocation;GO:0055088:lipid homeostasis;GO:0006629:lipid metabolic process;GO:0045332:phospholipid translocation;GO:0032376:positive regulation of cholesterol transport;GO:0061092:positive regulation of phospholipid translocation;GO:2001140:positive regulation of phospholipid transport;GO:1901557:respo…	GO:0015629:actin cytoskeleton;GO:0016324:apical plasma membrane;GO:0030136:clathrin-coated vesicle;GO:0005737:cytoplasm;GO:0005829:cytosol;GO:0070062:extracellular exosome;GO:0005925:focal adhesion;GO:0046581:intercellular canaliculus;GO:0016020:membrane;GO:0045121:membrane raft;GO:0005654:nucleoplasm;GO:0005886:plasma membrane;	GO:0005524:ATP binding;GO:0042626:ATPase-coupled transmembrane transporter activity;GO:0090554:phosphatidylcholine floppase activity;GO:0090555:phosphatidylethanolamine flippase activity;GO:0005548:phospholipid transporter activity;GO:0042910:xenobiotic transmembrane transporter activity;	K05659	;ko02010 ABC transporters;ko04976 Bile secretion;
ENSG00000005483	13704	1740	8.57	2320	8.47	2544	8.42	2101	8.78	1801	8.64	1927	8.95	2092	8.88	1901	9.03	2153	9.21	2049	8.81	2180	8.41	1978	8.55	2503	8.82	2246	9.29	2139	8.68	7	104940943	105115019	+	KMT2E	lysine methyltransferase 2E (inactive) [Source:HGNC Symbol%3BAcc:HGNC:18541]	GO:0007049:cell cycle;GO:0006306:DNA methylation;GO:0030218:erythrocyte differentiation;GO:0034968:histone lysine methylation;GO:0042119:neutrophil activation;GO:0002446:neutrophil mediated immunity;GO:1900087:positive regulation of G1/S transition of mitotic cell cycle;GO:1905437:obsolete positive regulation of histone H3-K4 trimethylation;GO:0045893:positive regulation of DNA-templated transcri…	GO:0000785:chromatin;GO:0005737:cytoplasm;GO:0005815:microtubule organizing center;GO:0016604:nuclear body;GO:0016607:nuclear speck;GO:0005654:nucleoplasm;GO:0005634:nucleus;GO:0005886:plasma membrane;GO:0032991:protein-containing complex;	GO:0019899:enzyme binding;GO:0046872:metal ion binding;GO:0035064:methylated histone binding;	K09189;K04135	;ko00310 Lysine degradation;ko01100 Metabolic pathways;;ko04020 Calcium signaling pathway;ko04022 cGMP-PKG signaling pathway;ko04080 Neuroactive ligand-receptor interaction;ko04152 AMPK signaling pathway;ko04261 Adrenergic signaling in cardiomyocytes;ko04270 Vascular smooth muscle contraction;ko04970 Salivary secretion;
ENSG00000005486	2390	423	11.95	524	10.98	675	12.81	511	12.25	420	11.56	459	12.22	488	11.88	438	11.93	512	12.55	472	11.63	561	12.41	410	10.16	619	12.51	517	12.26	536	12.48	7	75842602	75888926	+	RHBDD2	rhomboid domain containing 2 [Source:HGNC Symbol%3BAcc:HGNC:23082]	GO:0030968:endoplasmic reticulum unfolded protein response;GO:0030433:ubiquitin-dependent ERAD pathway;	GO:0005794:Golgi apparatus;GO:0000139:Golgi membrane;GO:0000839:Hrd1p ubiquitin ligase ERAD-L complex;GO:0030176:obsolete integral component of endoplasmic reticulum membrane;GO:0005654:nucleoplasm;GO:0048471:perinuclear region of cytoplasm;	GO:0051787:misfolded protein binding;GO:0004252:serine-type endopeptidase activity;GO:1990381:ubiquitin-specific protease binding;	K09652	-
ENSG00000005513	4470	0	0	0	0	0	0	0	0	0	0	0	0	0	0	0	0	0	0	0	0	0	0	0	0	0	0	0	0	0	0	16	981770	986979	+	SOX8	SRY-box transcription factor 8 [Source:HGNC Symbol%3BAcc:HGNC:11203]	GO:0060612:adipose tissue development;GO:0060018:astrocyte fate commitment;GO:0045165:cell fate commitment;GO:0048469:cell maturation;GO:0048484:enteric nervous system development;GO:0045444:fat cell differentiation;GO:0001701:in utero embryonic development;GO:0008584:male gonad development;GO:0072289:metanephric nephron tubule formation;GO:0061138:morphogenesis of a branching epithelium;GO:00020…	GO:0000785:chromatin;GO:0005737:cytoplasm;GO:0005634:nucleus;GO:0005667:transcription regulator complex;	GO:0003677:DNA binding;GO:0000981:DNA-binding transcription factor activity, RNA polymerase II-specific;GO:0000978:RNA polymerase II cis-regulatory region sequence-specific DNA binding;GO:1990837:sequence-specific double-stranded DNA binding;	K09270	-
ENSG00000005700	8719	1367	10.58	1903	10.93	2014	10.47	1542	10.13	1408	10.62	1416	10.33	1470	9.81	1350	10.08	1515	10.18	1669	11.28	1795	10.88	1610	10.94	1796	9.95	1436	9.33	1582	10.1	6	82169986	82247754	-	IBTK	inhibitor of Bruton tyrosine kinase [Source:HGNC Symbol%3BAcc:HGNC:17853]	GO:0001933:negative regulation of protein phosphorylation;GO:0051209:release of sequestered calcium ion into cytosol;	GO:0005737:cytoplasm;GO:0016020:membrane;GO:0005654:nucleoplasm;	GO:0019901:protein kinase binding;GO:0030292:protein tyrosine kinase inhibitor activity;	K17985;K03956	;ko04137 Mitophagy - animal;ko04140 Autophagy - animal;ko05010 Alzheimer disease;ko05014 Amyotrophic lateral sclerosis;ko05016 Huntington disease;ko05017 Spinocerebellar ataxia;ko05022 Pathways of neurodegeneration - multiple diseases;;ko00190 Oxidative phosphorylation;ko01100 Metabolic pathways;ko04714 Thermogenesis;ko04723 Retrograde endocannabinoid signaling;ko04932 Non-alcoholic fatty liver d…
ENSG00000005801	11711	1049	6.05	1372	5.86	1493	5.78	1177	5.76	1036	5.82	1132	6.15	1085	5.39	1058	5.88	1136	5.68	1183	5.95	1299	5.86	1197	6.05	1295	5.34	1163	5.63	1206	5.73	11	3339261	3379222	-	ZNF195	zinc finger protein 195 [Source:HGNC Symbol%3BAcc:HGNC:12986]	GO:0006355:regulation of DNA-templated transcription;GO:0006357:regulation of transcription by RNA polymerase II;	GO:0005654:nucleoplasm;GO:0005634:nucleus;	GO:0000981:DNA-binding transcription factor activity, RNA polymerase II-specific;GO:0001227:DNA-binding transcription repressor activity, RNA polymerase II-specific;GO:0046872:metal ion binding;GO:0000978:RNA polymerase II cis-regulatory region sequence-specific DNA binding;GO:0008270:zinc ion binding;	K09228	;ko05168 Herpes simplex virus 1 infection;
ENSG00000005810	34127	3637	7.19	4955	7.27	5678	7.54	4668	7.83	3788	7.3	4050	7.55	4019	6.85	3736	7.13	4063	6.98	4402	7.6	4984	7.72	4224	7.33	4660	6.6	4092	6.79	4070	6.64	13	77042474	77327094	-	MYCBP2	MYC binding protein 2 [Source:HGNC Symbol%3BAcc:HGNC:23386]	GO:0021785:branchiomotor neuron axon guidance;GO:0048667:cell morphogenesis involved in neuron differentiation;GO:0021952:central nervous system projection neuron axonogenesis;GO:0032922:circadian regulation of gene expression;GO:0008045:motor neuron axon guidance;GO:0042177:negative regulation of protein catabolic process;GO:0050905:neuromuscular process;GO:0031398:positive regulation of protein…	GO:0030424:axon;GO:0005737:cytoplasm;GO:0043231:intracellular membrane-bounded organelle;GO:0015630:microtubule cytoskeleton;GO:0005654:nucleoplasm;GO:0005634:nucleus;GO:0016020:membrane;GO:0005856:cytoskeleton;	GO:0005085:guanyl-nucleotide exchange factor activity;GO:0042802:identical protein binding;GO:0031267:small GTPase binding;GO:0061630:ubiquitin protein ligase activity;GO:0008270:zinc ion binding;GO:0046872:metal ion binding;GO:0004842:ubiquitin-protein transferase activity;GO:0003964:RNA-directed DNA polymerase activity;GO:0009036:type II site-specific deoxyribonuclease activity;	K10693	;ko04361 Axon regeneration;
ENSG00000005812	7076	1605	15.31	2270	16.06	2383	15.27	1773	14.35	1748	16.25	1978	17.79	1912	15.72	1736	15.98	1926	15.95	2362	19.66	2055	15.35	1952	16.34	2442	16.67	1991	15.94	1947	15.31	13	76992598	77027195	-	FBXL3	F-box and leucine rich repeat protein 3 [Source:HGNC Symbol%3BAcc:HGNC:13599]	GO:0043153:entrainment of circadian clock by photoperiod;GO:0000086:G2/M transition of mitotic cell cycle;GO:0031648:protein destabilization;GO:0016567:protein ubiquitination;GO:0051726:regulation of cell cycle;GO:0042752:regulation of circadian rhythm;GO:0048511:rhythmic process;GO:0031146:SCF-dependent proteasomal ubiquitin-dependent protein catabolic process;GO:0043161:proteasome-mediated ubiq…	GO:0005829:cytosol;GO:0016604:nuclear body;GO:0005634:nucleus;GO:0019005:SCF ubiquitin ligase complex;GO:0000151:ubiquitin ligase complex;GO:0005654:nucleoplasm;GO:0005783:endoplasmic reticulum;GO:0070062:extracellular exosome;GO:0005794:Golgi apparatus;GO:0005765:lysosomal membrane;GO:0005764:lysosome;GO:0048471:perinuclear region of cytoplasm;	GO:0004842:ubiquitin-protein transferase activity;GO:0016798:hydrolase activity, acting on glycosyl bonds;GO:0005537:mannose binding;	K10269;K12390	;ko04710 Circadian rhythm;;ko04142 Lysosome;
ENSG00000005844	9864	1	0.01	0	0	4	0.02	0	0	3	0.02	0	0	0	0	3	0.02	3	0.02	1	0.01	1	0.01	0	0	1	0	0	0	1	0.01	16	30472658	30523567	+	ITGAL	integrin subunit alpha L [Source:HGNC Symbol%3BAcc:HGNC:6148]	GO:0007155:cell adhesion;GO:0098609:cell-cell adhesion;GO:0007160:cell-matrix adhesion;GO:0007157:heterophilic cell-cell adhesion via plasma membrane cell adhesion molecules;GO:0006954:inflammatory response;GO:0007229:integrin-mediated signaling pathway;GO:0007159:leukocyte cell-cell adhesion;GO:0035683:memory T cell extravasation;GO:0006909:phagocytosis;GO:0043113:receptor clustering;GO:0007165:…	GO:0009986:cell surface;GO:0070062:extracellular exosome;GO:0034687:integrin alphaL-beta2 complex;GO:0008305:integrin complex;GO:0016020:membrane;GO:0005886:plasma membrane;GO:0035579:specific granule membrane;	GO:0050839:cell adhesion molecule binding;GO:0030369:ICAM-3 receptor activity;GO:0046872:metal ion binding;GO:0044877:protein-containing complex binding;	K05718	;ko04015 Rap1 signaling pathway;ko04514 Cell adhesion molecules;ko04613 Neutrophil extracellular trap formation;ko04650 Natural killer cell mediated cytotoxicity;ko04670 Leukocyte transendothelial migration;ko04810 Regulation of actin cytoskeleton;ko05144 Malaria;ko05150 Staphylococcus aureus infection;ko05166 Human T-cell leukemia virus 1 infection;ko05169 Epstein-Barr virus infection;ko05323 Rh…
ENSG00000005882	5471	160	1.97	164	1.5	186	1.54	170	1.78	145	1.74	192	2.23	197	2.1	143	1.7	159	1.7	118	1.27	162	1.57	132	1.43	291	2.57	216	2.24	207	2.11	17	50094737	50112152	+	PDK2	pyruvate dehydrogenase kinase 2 [Source:HGNC Symbol%3BAcc:HGNC:8810]	GO:0031670:cellular response to nutrient;GO:0034614:cellular response to reactive oxygen species;GO:0042593:glucose homeostasis;GO:0006006:glucose metabolic process;GO:0008286:insulin receptor signaling pathway;GO:0072332:intrinsic apoptotic signaling pathway by p53 class mediator;GO:0006468:protein phosphorylation;GO:0010510:regulation of acetyl-CoA biosynthetic process from pyruvate;GO:0050848:…	GO:0005829:cytosol;GO:0005759:mitochondrial matrix;GO:0005967:mitochondrial pyruvate dehydrogenase complex;GO:0005739:mitochondrion;GO:0005654:nucleoplasm;	GO:0005524:ATP binding;GO:0042803:protein homodimerization activity;GO:0004672:protein kinase activity;GO:0004740:pyruvate dehydrogenase (acetyl-transferring) kinase activity;	K00898	;ko05415 Diabetic cardiomyopathy;
ENSG00000005884	9802	4024	27.71	5526	28.22	6266	28.98	4633	27.07	4213	28.26	4525	29.37	4313	25.6	3769	25.04	4528	27.07	4481	26.93	5315	28.66	4592	27.75	5171	25.48	4302	24.87	4848	27.52	17	50055968	50090481	+	ITGA3	integrin subunit alpha 3 [Source:HGNC Symbol%3BAcc:HGNC:6139]	GO:0007160:cell-matrix adhesion;GO:0097062:dendritic spine maintenance;GO:0035640:exploration behavior;GO:0007507:heart development;GO:0007229:integrin-mediated signaling pathway;GO:0030324:lung development;GO:0060135:maternal process involved in female pregnancy;GO:0007613:memory;GO:0048333:mesodermal cell differentiation;GO:0031345:negative regulation of cell projection organization;GO:0035024:…	GO:0016323:basolateral plasma membrane;GO:0071944:cell periphery;GO:0009986:cell surface;GO:0060076:excitatory synapse;GO:0009897:external side of plasma membrane;GO:0070062:extracellular exosome;GO:0031527:filopodium membrane;GO:0005925:focal adhesion;GO:1990812:growth cone filopodium;GO:0034667:integrin alpha3-beta1 complex;GO:0008305:integrin complex;GO:0048471:perinuclear region of cytoplasm;…	GO:0005518:collagen binding;GO:0001968:fibronectin binding;GO:0005178:integrin binding;GO:0043236:laminin binding;GO:0046872:metal ion binding;GO:0002020:protease binding;GO:0019904:protein domain specific binding;GO:0046982:protein heterodimerization activity;	K06482;K17985	;ko04151 PI3K-Akt signaling pathway;ko04510 Focal adhesion;ko04512 ECM-receptor interaction;ko04640 Hematopoietic cell lineage;ko04810 Regulation of actin cytoskeleton;ko05165 Human papillomavirus infection;ko05200 Pathways in cancer;ko05222 Small cell lung cancer;ko05410 Hypertrophic cardiomyopathy;ko05412 Arrhythmogenic right ventricular cardiomyopathy;ko05414 Dilated cardiomyopathy;;ko04137 Mi…
ENSG00000005889	9037	2078	15.52	2710	15.01	3043	15.27	2496	15.82	2207	16.06	2334	16.43	2452	15.79	2164	15.59	2364	15.33	2546	16.6	2557	14.96	2318	15.19	3452	18.45	2740	17.18	2696	16.6	X	24149173	24216255	+	ZFX	zinc finger protein X-linked [Source:HGNC Symbol%3BAcc:HGNC:12869]	GO:0009566:fertilization;GO:0048872:homeostasis of number of cells;GO:0035264:multicellular organism growth;GO:0048599:oocyte development;GO:0001541:ovarian follicle development;GO:0060746:parental behavior;GO:0009791:post-embryonic development;GO:0006357:regulation of transcription by RNA polymerase II;GO:0007283:spermatogenesis;	GO:0005694:chromosome;GO:0005730:nucleolus;GO:0005654:nucleoplasm;	GO:0043035:chromatin insulator sequence binding;GO:0046872:metal ion binding;	K01353;K02010	;ko04210 Apoptosis;ko04650 Natural killer cell mediated cytotoxicity;ko04940 Type I diabetes mellitus;ko05202 Transcriptional misregulation in cancer;ko05320 Autoimmune thyroid disease;ko05330 Allograft rejection;ko05332 Graft-versus-host disease;;ko02010 ABC transporters;
ENSG00000005893	9404	2611	18.74	3601	19.17	3868	18.65	2745	16.72	2593	18.13	2654	17.96	3165	19.58	2849	19.73	3003	18.71	3008	18.84	3197	17.97	2904	18.29	4162	21.38	3282	19.78	3408	20.16	X	120426148	120469365	-	LAMP2	lysosomal associated membrane protein 2 [Source:HGNC Symbol%3BAcc:HGNC:6501]	GO:0097352:autophagosome maturation;GO:0009267:cellular response to starvation;GO:0061684:chaperone-mediated autophagy;GO:0072594:establishment of protein localization to organelle;GO:1905146:lysosomal protein catabolic process;GO:0031333:negative regulation of protein-containing complex assembly;GO:0017038:protein import;GO:0050821:protein stabilization;GO:0006605:protein targeting;GO:0061740:pr…	GO:0044754:autolysosome;GO:0035577:azurophil granule membrane;GO:0061742:chaperone-mediated autophagy translocation complex;GO:0070062:extracellular exosome;GO:0005615:extracellular space;GO:0101003:ficolin-1-rich granule membrane;GO:0097637:obsolete integral component of autophagosome membrane;GO:0005770:late endosome;GO:0031902:late endosome membrane;GO:0043202:lysosomal lumen;GO:1990836:lysoso…	GO:0019899:enzyme binding;	K06528	;ko04140 Autophagy - animal;ko04142 Lysosome;ko04145 Phagosome;ko05152 Tuberculosis;
ENSG00000005961	5695	8	0.09	3	0.03	6	0.05	10	0.1	3	0.03	2	0.02	11	0.11	9	0.1	12	0.12	10	0.1	4	0.04	9	0.09	13	0.11	10	0.1	12	0.12	17	44372180	44389649	-	ITGA2B	integrin subunit alpha 2b [Source:HGNC Symbol%3BAcc:HGNC:6138]	GO:0007160:cell-matrix adhesion;GO:0007229:integrin-mediated signaling pathway;GO:0070527:platelet aggregation;GO:0002687:positive regulation of leukocyte migration;	GO:0072562:blood microparticle;GO:0009986:cell surface;GO:0009897:external side of plasma membrane;GO:0070062:extracellular exosome;GO:0005925:focal adhesion;GO:0008305:integrin complex;GO:0005886:plasma membrane;GO:0031092:platelet alpha granule membrane;	GO:0050840:extracellular matrix binding;GO:0070051:fibrinogen binding;GO:0042802:identical protein binding;GO:0046872:metal ion binding;	K06476	;ko04015 Rap1 signaling pathway;ko04151 PI3K-Akt signaling pathway;ko04510 Focal adhesion;ko04512 ECM-receptor interaction;ko04611 Platelet activation;ko04613 Neutrophil extracellular trap formation;ko04640 Hematopoietic cell lineage;ko04810 Regulation of actin cytoskeleton;ko05165 Human papillomavirus infection;ko05200 Pathways in cancer;ko05222 Small cell lung cancer;ko05410 Hypertrophic cardio…
ENSG00000005981	4606	0	0	1	0.01	1	0.01	0	0	1	0.01	0	0	0	0	0	0	3	0.04	1	0.01	2	0.02	1	0.01	1	0.01	2	0.02	1	0.01	7	95478444	95540233	+	ASB4	ankyrin repeat and SOCS box containing 4 [Source:HGNC Symbol%3BAcc:HGNC:16009]	GO:0035556:intracellular signal transduction;GO:2001214:positive regulation of vasculogenesis;GO:0051865:protein autoubiquitination;	GO:0031462:Cul2-RING ubiquitin ligase complex;GO:0031466:Cul5-RING ubiquitin ligase complex;GO:0005829:cytosol;	GO:0061630:ubiquitin protein ligase activity;GO:0031625:ubiquitin protein ligase binding;GO:0004842:ubiquitin-protein transferase activity;	K10326	-
ENSG00000006007	4390	1981	30.46	2633	30.02	2867	29.61	2261	29.5	1963	29.41	1955	28.33	2254	29.88	1953	28.97	2359	31.49	2168	29.09	2471	29.75	2216	29.9	2494	27.44	2177	28.1	2336	29.61	16	19501693	19522123	-	GDE1	glycerophosphodiester phosphodiesterase 1 [Source:HGNC Symbol%3BAcc:HGNC:29644]	GO:0006580:ethanolamine metabolic process;GO:0046475:glycerophospholipid catabolic process;GO:0006629:lipid metabolic process;GO:0070291:N-acylethanolamine metabolic process;GO:0006644:phospholipid metabolic process;	GO:0030659:cytoplasmic vesicle membrane;GO:0005886:plasma membrane;	GO:0008889:glycerophosphodiester phosphodiesterase activity;GO:0047395:glycerophosphoinositol glycerophosphodiesterase activity;GO:0004622:lysophospholipase activity;GO:0046872:metal ion binding;	K19179	-
ENSG00000006015	3371	55	1.1	78	1.16	95	1.28	50	0.85	48	0.94	44	0.83	69	1.19	54	1.04	55	0.96	43	0.75	75	1.18	64	1.12	97	1.39	77	1.29	63	1.04	19	18588685	18592337	+	REX1BD	required for excision 1-B domain containing [Source:HGNC Symbol%3BAcc:HGNC:26098]	GO:0007507:heart development;GO:0071557:histone H3-K27 demethylation;GO:0010468:regulation of gene expression;	GO:0044666:MLL3/4 complex;	GO:0031490:chromatin DNA binding;GO:0051213:dioxygenase activity;GO:0071558:histone H3K27me2/H3K27me3 demethylase activity;GO:0046872:metal ion binding;GO:0000978:RNA polymerase II cis-regulatory region sequence-specific DNA binding;	K17985;K09488	;ko04137 Mitophagy - animal;ko04140 Autophagy - animal;ko05010 Alzheimer disease;ko05014 Amyotrophic lateral sclerosis;ko05016 Huntington disease;ko05017 Spinocerebellar ataxia;ko05022 Pathways of neurodegeneration - multiple diseases;;ko05012 Parkinson disease;ko05022 Pathways of neurodegeneration - multiple diseases;
ENSG00000006016	2967	159	3.62	215	3.63	252	3.85	201	3.88	185	4.1	179	3.84	184	3.61	160	3.51	185	3.65	159	3.16	216	3.85	206	4.11	225	3.66	221	4.22	171	3.21	19	18572220	18607741	-	CRLF1	cytokine receptor like factor 1 [Source:HGNC Symbol%3BAcc:HGNC:2364]	GO:0019221:cytokine-mediated signaling pathway;GO:2000672:negative regulation of motor neuron apoptotic process;GO:0043524:negative regulation of neuron apoptotic process;GO:0008284:positive regulation of cell population proliferation;GO:0042531:positive regulation of tyrosine phosphorylation of STAT protein;GO:0001657:ureteric bud development;	GO:0097058:CRLF-CLCF1 complex;GO:0005829:cytosol;GO:0009897:external side of plasma membrane;GO:0005576:extracellular region;GO:0005615:extracellular space;GO:0043235:receptor complex;	GO:0019955:cytokine binding;GO:0004896:cytokine receptor activity;	K12581	;ko03018 RNA degradation;
ENSG00000006025	6572	123	1.26	203	1.55	211	1.46	173	1.51	142	1.42	162	1.57	143	1.27	145	1.44	132	1.18	149	1.34	180	1.45	137	1.23	189	1.39	192	1.66	197	1.67	17	47807372	47821834	-	OSBPL7	oxysterol binding protein like 7 [Source:HGNC Symbol%3BAcc:HGNC:16387]	GO:0006699:bile acid biosynthetic process;GO:0071397:cellular response to cholesterol;GO:1901800:positive regulation of proteasomal protein catabolic process;GO:0010506:regulation of autophagy;	GO:0005776:autophagosome;GO:0005829:cytosol;GO:0005789:endoplasmic reticulum membrane;GO:0043231:intracellular membrane-bounded organelle;GO:0016020:membrane;GO:0005654:nucleoplasm;GO:0097038:perinuclear endoplasmic reticulum;GO:0005886:plasma membrane;	GO:0015485:cholesterol binding;GO:0032934:sterol binding;GO:0015248:sterol transporter activity;	-	-
ENSG00000006042	5187	0	0	0	0	0	0	0	0	0	0	0	0	0	0	0	0	0	0	0	0	0	0	0	0	0	0	0	0	0	0	17	32927910	32945106	+	TMEM98	transmembrane protein 98 [Source:HGNC Symbol%3BAcc:HGNC:24529]	GO:0031642:negative regulation of myelination;GO:0048715:negative regulation of oligodendrocyte differentiation;GO:1900181:negative regulation of protein localization to nucleus;GO:0010955:negative regulation of protein processing;GO:0045063:T-helper 1 cell differentiation;	GO:0005783:endoplasmic reticulum;GO:0005789:endoplasmic reticulum membrane;GO:0070062:extracellular exosome;GO:0005615:extracellular space;GO:0005886:plasma membrane;	-	K09228;K05610;K15696	-
ENSG00000006047	4631	1	0.01	0	0	0	0	0	0	2	0.03	0	0	3	0.04	2	0.03	2	0.03	0	0	2	0.02	2	0.03	2	0.02	2	0.02	5	0.06	17	7288263	7294639	-	YBX2	Y-box binding protein 2 [Source:HGNC Symbol%3BAcc:HGNC:17948]	GO:0048599:oocyte development;GO:0120162:positive regulation of cold-induced thermogenesis;GO:0010468:regulation of gene expression;GO:0007283:spermatogenesis;GO:0006366:transcription by RNA polymerase II;GO:0009386:translational attenuation;	GO:0005737:cytoplasm;GO:0005634:nucleus;	GO:0003677:DNA binding;GO:0003676:nucleic acid binding;GO:0003723:RNA binding;	K09277	-
ENSG00000006059	1303	0	0	0	0	0	0	0	0	0	0	0	0	0	0	0	0	0	0	0	0	0	0	0	0	0	0	0	0	0	0	17	41346092	41350828	-	KRT33A	keratin 33A [Source:HGNC Symbol%3BAcc:HGNC:6450]	-	GO:0005882:intermediate filament;	GO:0005198:structural molecule activity;	K07604	;ko04915 Estrogen signaling pathway;ko05150 Staphylococcus aureus infection;
ENSG00000006062	5668	268	3.19	378	3.34	416	3.33	308	3.11	270	3.13	282	3.17	349	3.58	312	3.58	375	3.88	332	3.45	375	3.5	328	3.43	408	3.48	329	3.29	278	2.73	17	45263119	45317029	-	MAP3K14	mitogen-activated protein kinase kinase kinase 14 [Source:HGNC Symbol%3BAcc:HGNC:6853]	GO:0071260:cellular response to mechanical stimulus;GO:0051607:defense response to virus;GO:0007249:canonical NF-kappaB signal transduction;GO:0006955:immune response;GO:0038061:non-canonical NF-kappaB signal transduction;GO:0043123:positive regulation of canonical NF-kappaB signal transduction;	GO:0005829:cytosol;GO:0001650:fibrillar center;GO:0043231:intracellular membrane-bounded organelle;GO:0005654:nucleoplasm;	GO:0005524:ATP binding;GO:0004709:MAP kinase kinase kinase activity;GO:0004704:NF-kappaB-inducing kinase activity;GO:0004672:protein kinase activity;GO:0106310:protein serine kinase activity;GO:0004674:protein serine/threonine kinase activity;	K04466	;ko04010 MAPK signaling pathway;ko04064 NF-kappa B signaling pathway;ko04210 Apoptosis;ko04380 Osteoclast differentiation;ko04625 C-type lectin receptor signaling pathway;ko04660 T cell receptor signaling pathway;ko04668 TNF signaling pathway;ko04672 Intestinal immune network for IgA production;ko04936 Alcoholic liver disease;ko05120 Epithelial cell signaling in Helicobacter pylori infection;ko05…
ENSG00000006071	27254	42	0.1	54	0.1	63	0.1	48	0.1	50	0.12	53	0.12	37	0.08	44	0.11	49	0.11	46	0.1	54	0.1	50	0.11	57	0.1	55	0.11	49	0.1	11	17392498	17476894	-	ABCC8	ATP binding cassette subfamily C member 8 [Source:HGNC Symbol%3BAcc:HGNC:59]	GO:0001678:intracellular glucose homeostasis;GO:0071310:cellular response to organic substance;GO:0007565:female pregnancy;GO:0098662:inorganic cation transmembrane transport;GO:0007613:memory;GO:0016525:negative regulation of angiogenesis;GO:1905604:negative regulation of blood-brain barrier permeability;GO:0060253:negative regulation of glial cell proliferation;GO:0046676:negative regulation of…	GO:0008282:inward rectifying potassium channel;GO:0016020:membrane;GO:0005739:mitochondrion;GO:0005886:plasma membrane;GO:0031004:potassium ion-transporting ATPase complex;GO:0042383:sarcolemma;GO:0030672:synaptic vesicle membrane;	GO:0005524:ATP binding;GO:0015272:ATP-activated inward rectifier potassium channel activity;GO:0019829:ATPase-coupled monoatomic cation transmembrane transporter activity;GO:0042626:ATPase-coupled transmembrane transporter activity;GO:0005267:potassium channel activity;GO:0008281:sulfonylurea receptor activity;GO:0044325:transmembrane transporter binding;	K05032	;ko02010 ABC transporters;ko04911 Insulin secretion;ko04930 Type II diabetes mellitus;
ENSG00000006116	1917	1	0.04	0	0	0	0	0	0	2	0.07	2	0.07	0	0	0	0	0	0	2	0.06	0	0	0	0	0	0	0	0	0	0	16	24256335	24362412	+	CACNG3	calcium voltage-gated channel auxiliary subunit gamma 3 [Source:HGNC Symbol%3BAcc:HGNC:1407]	GO:0006816:calcium ion transport;GO:0099590:neurotransmitter receptor internalization;GO:0099645:neurotransmitter receptor localization to postsynaptic specialization membrane;GO:0098943:neurotransmitter receptor transport, postsynaptic endosome to lysosome;GO:2000969:positive regulation of AMPA receptor activity;GO:0051968:positive regulation of synaptic transmission, glutamatergic;GO:0098970:po…	GO:0032281:AMPA glutamate receptor complex;GO:0030425:dendrite;GO:0030666:endocytic vesicle membrane;GO:0060076:excitatory synapse;GO:0098978:glutamatergic synapse;GO:0099061:obsolete integral component of postsynaptic density membrane;GO:0005886:plasma membrane;GO:0098839:postsynaptic density membrane;GO:0098685:Schaffer collateral - CA1 synapse;GO:0036477:somatodendritic compartment;GO:0005891:…	GO:0016247:channel regulator activity;GO:0035255:ionotropic glutamate receptor binding;GO:0030165:PDZ domain binding;GO:0005245:voltage-gated calcium channel activity;	K04868	;ko04010 MAPK signaling pathway;ko04260 Cardiac muscle contraction;ko04261 Adrenergic signaling in cardiomyocytes;ko04921 Oxytocin signaling pathway;ko05410 Hypertrophic cardiomyopathy;ko05412 Arrhythmogenic right ventricular cardiomyopathy;ko05414 Dilated cardiomyopathy;
ENSG00000006118	7274	498	4.62	689	4.74	812	5.06	633	4.98	531	4.8	558	4.88	550	4.4	475	4.25	620	4.99	562	4.55	639	4.64	584	4.76	664	4.41	551	4.29	619	4.74	11	60924460	60937159	+	TMEM132A	transmembrane protein 132A [Source:HGNC Symbol%3BAcc:HGNC:31092]	-	GO:0005783:endoplasmic reticulum;GO:0005788:endoplasmic reticulum lumen;GO:0005789:endoplasmic reticulum membrane;GO:0070062:extracellular exosome;GO:0005794:Golgi apparatus;GO:0000139:Golgi membrane;	-	K17599	-
ENSG00000006125	7591	6730	59.85	9190	60.6	10062	60.1	7822	59.02	6797	58.88	6658	55.81	7810	59.87	7278	62.44	7688	59.34	7487	58.1	8273	57.6	7315	57.08	9728	61.9	8470	63.23	8338	61.12	17	35578046	35726413	+	AP2B1	adaptor related protein complex 2 subunit beta 1 [Source:HGNC Symbol%3BAcc:HGNC:563]	GO:0035904:aorta development;GO:0003279:cardiac septum development;GO:0048268:clathrin coat assembly;GO:0072583:clathrin-dependent endocytosis;GO:0060976:coronary vasculature development;GO:0007507:heart development;GO:0006886:intracellular protein transport;GO:0001822:kidney development;GO:1901215:obsolete negative regulation of neuron death;GO:0099590:neurotransmitter receptor internalization;G…	GO:0030122:AP-2 adaptor complex;GO:0030119:AP-type membrane coat adaptor complex;GO:0030131:clathrin adaptor complex;GO:0030118:clathrin coat;GO:0098978:glutamatergic synapse;GO:0098794:postsynapse;GO:0030665:clathrin-coated vesicle membrane;GO:0005794:Golgi apparatus;GO:0005829:cytosol;GO:0043231:intracellular membrane-bounded organelle;GO:0005802:trans-Golgi network;	GO:0030276:clathrin binding;GO:0044877:protein-containing complex binding;GO:0019901:protein kinase binding;	K11825	;ko04144 Endocytosis;ko04721 Synaptic vesicle cycle;ko04961 Endocrine and other factor-regulated calcium reabsorption;ko05016 Huntington disease;
ENSG00000006128	1712	0	0	0	0	0	0	0	0	0	0	0	0	0	0	0	0	0	0	0	0	0	0	0	0	0	0	0	0	0	0	7	97732084	97740472	+	TAC1	tachykinin precursor 1 [Source:HGNC Symbol%3BAcc:HGNC:11517]	GO:0019731:antibacterial humoral response;GO:0019732:antifungal humoral response;GO:0061844:antimicrobial humoral immune response mediated by antimicrobial peptide;GO:0008306:associative learning;GO:0007267:cell-cell signaling;GO:1990090:cellular response to nerve growth factor stimulus;GO:0007268:chemical synaptic transmission;GO:0050829:defense response to Gram-negative bacterium;GO:0050830:def…	GO:0030424:axon;GO:0005576:extracellular region;GO:0005615:extracellular space;GO:0043025:neuronal cell body;GO:0005886:plasma membrane;GO:0045202:synapse;	GO:0031836:neuromedin K receptor binding;GO:0048018:receptor ligand activity;GO:0031837:substance K receptor binding;GO:0031835:substance P receptor binding;	K05239	;ko04080 Neuroactive ligand-receptor interaction;
ENSG00000006194	6403	607	6.4	727	5.68	824	5.83	680	6.08	581	5.97	564	5.6	707	6.42	594	6.04	680	6.22	621	5.71	739	6.1	685	6.34	841	6.34	737	6.52	689	5.99	16	3263800	3301401	+	ZNF263	zinc finger protein 263 [Source:HGNC Symbol%3BAcc:HGNC:13056]	GO:0000122:negative regulation of transcription by RNA polymerase II;GO:0045944:positive regulation of transcription by RNA polymerase II;GO:0006357:regulation of transcription by RNA polymerase II;GO:0006355:regulation of DNA-templated transcription;	GO:0005634:nucleus;	GO:0003700:DNA-binding transcription factor activity;GO:0000981:DNA-binding transcription factor activity, RNA polymerase II-specific;GO:0001227:DNA-binding transcription repressor activity, RNA polymerase II-specific;GO:0046872:metal ion binding;GO:0000978:RNA polymerase II cis-regulatory region sequence-specific DNA binding;GO:0043565:sequence-specific DNA binding;GO:1990837:sequence-specific d…	K09229	-
ENSG00000006210	5960	0	0	0	0	0	0	0	0	0	0	0	0	0	0	0	0	0	0	0	0	0	0	0	0	0	0	0	0	0	0	16	57372477	57385044	+	CX3CL1	C-X3-C motif chemokine ligand 1 [Source:HGNC Symbol%3BAcc:HGNC:10647]	GO:0007568:obsolete aging;GO:0060055:angiogenesis involved in wound healing;GO:0035425:autocrine signaling;GO:0007155:cell adhesion;	GO:0042995:cell projection;GO:0009986:cell surface;GO:0005576:extracellular region;GO:0005615:extracellular space;	GO:0048020:CCR chemokine receptor binding;GO:0042056:chemoattractant activity;GO:0008009:chemokine activity;GO:0031737:CX3C chemokine receptor binding;	K05508	;ko04060 Cytokine-cytokine receptor interaction;ko04061 Viral protein interaction with cytokine and cytokine receptor;ko04062 Chemokine signaling pathway;ko04148 Efferocytosis;ko04668 TNF signaling pathway;ko05163 Human cytomegalovirus infection;
ENSG00000006282	5337	327	4.14	369	3.46	477	4.05	301	3.23	341	4.2	331	3.95	390	4.25	325	3.97	328	3.6	346	3.82	392	3.88	339	3.76	492	4.45	409	4.34	425	4.43	17	50543058	50555852	+	SPATA20	spermatogenesis associated 20 [Source:HGNC Symbol%3BAcc:HGNC:26125]	GO:0005975:carbohydrate metabolic process;GO:0030154:cell differentiation;GO:0007283:spermatogenesis;	GO:0005576:extracellular region;	-	K06888	-
ENSG00000006283	10062	15	0.1	11	0.05	12	0.05	20	0.11	10	0.07	14	0.09	15	0.09	23	0.15	18	0.1	31	0.18	20	0.11	14	0.08	21	0.1	26	0.15	27	0.15	17	50560715	50627474	+	CACNA1G	calcium voltage-gated channel subunit alpha1 G [Source:HGNC Symbol%3BAcc:HGNC:1394]	GO:0001508:action potential;GO:0014824:artery smooth muscle contraction;GO:0086016:AV node cell action potential;GO:0086027:AV node cell to bundle of His cell signaling;GO:0070509:calcium ion import;GO:0070588:calcium ion transmembrane transport;GO:0060402:calcium ion transport into cytosol;GO:0086002:cardiac muscle cell action potential involved in contraction;GO:0071549:cellular response to dex…	GO:0044297:cell body;GO:0005737:cytoplasm;GO:0030425:dendrite;GO:0016020:membrane;GO:0043005:neuron projection;GO:0043025:neuronal cell body;GO:0048471:perinuclear region of cytoplasm;GO:0005886:plasma membrane;GO:0045202:synapse;GO:0005891:voltage-gated calcium channel complex;GO:0001518:voltage-gated sodium channel complex;	GO:0008332:low voltage-gated calcium channel activity;GO:0097110:scaffold protein binding;GO:0005245:voltage-gated calcium channel activity;GO:0086056:voltage-gated calcium channel activity involved in AV node cell action potential;GO:0086059:voltage-gated calcium channel activity involved SA node cell action potential;GO:0005248:voltage-gated sodium channel activity;	K04854	;ko04010 MAPK signaling pathway;ko04020 Calcium signaling pathway;ko04713 Circadian entrainment;ko04925 Aldosterone synthesis and secretion;ko04927 Cortisol synthesis and secretion;ko04929 GnRH secretion;ko04930 Type II diabetes mellitus;ko04934 Cushing syndrome;
ENSG00000006327	1801	482	18.07	702	19.51	940	23.67	653	20.77	546	19.94	622	21.97	648	20.94	564	20.39	739	24.04	887	29.01	901	26.44	769	25.29	470	12.6	402	12.65	482	14.89	16	3018445	3022383	+	TNFRSF12A	TNF receptor superfamily member 12A [Source:HGNC Symbol%3BAcc:HGNC:18152]	GO:0001525:angiogenesis;GO:0006915:apoptotic process;GO:0007155:cell adhesion;GO:0030154:cell differentiation;GO:0043065:positive regulation of apoptotic process;GO:2001238:positive regulation of extrinsic apoptotic signaling pathway;GO:0061041:regulation of wound healing;	GO:0005886:plasma membrane;	-	K05149	;ko04060 Cytokine-cytokine receptor interaction;
ENSG00000006377	3445	21	0.41	48	0.7	60	0.79	44	0.73	41	0.78	50	0.92	57	0.96	51	0.96	44	0.75	35	0.6	69	1.06	44	0.76	64	0.9	54	0.89	52	0.84	7	97005553	97011040	+	DLX6	distal-less homeobox 6 [Source:HGNC Symbol%3BAcc:HGNC:2919]	GO:0048646:anatomical structure formation involved in morphogenesis;GO:0030154:cell differentiation;GO:0030326:embryonic limb morphogenesis;GO:0030855:epithelial cell differentiation;GO:0060322:head development;GO:0042472:inner ear morphogenesis;GO:0007399:nervous system development;GO:0050679:positive regulation of epithelial cell proliferation;GO:0006357:regulation of transcription by RNA polym…	GO:0000785:chromatin;GO:0005634:nucleus;	GO:0003700:DNA-binding transcription factor activity;GO:0000981:DNA-binding transcription factor activity, RNA polymerase II-specific;GO:0000978:RNA polymerase II cis-regulatory region sequence-specific DNA binding;GO:1990837:sequence-specific double-stranded DNA binding;	K09314	-
ENSG00000006432	12386	158	0.86	241	0.97	299	1.09	213	0.98	209	1.11	202	1.04	230	1.08	222	1.17	212	1	234	1.11	244	1.04	217	1.04	230	0.9	206	0.94	247	1.11	14	70722526	70809534	-	MAP3K9	mitogen-activated protein kinase kinase kinase 9 [Source:HGNC Symbol%3BAcc:HGNC:6861]	GO:0007257:obsolete activation of JUN kinase activity;GO:0006915:apoptotic process;GO:0043065:positive regulation of apoptotic process;GO:0046777:protein autophosphorylation;GO:0006468:protein phosphorylation;GO:0008219:cell death;	-	GO:0005524:ATP binding;GO:0004706:JUN kinase kinase kinase activity;GO:0004708:MAP kinase kinase activity;GO:0042803:protein homodimerization activity;GO:0004672:protein kinase activity;GO:0106310:protein serine kinase activity;GO:0004674:protein serine/threonine kinase activity;	K04417	;ko04010 MAPK signaling pathway;ko04013 MAPK signaling pathway - fly;ko04361 Axon regeneration;
ENSG00000006451	3579	1259	23.75	1763	24.66	1878	23.79	1477	23.64	1355	24.9	1386	24.64	1480	24.06	1257	22.87	1452	23.77	1515	24.94	1518	22.42	1434	23.73	1798	24.27	1528	24.19	1553	24.14	7	39623565	39708120	+	RALA	RAS like proto-oncogene A [Source:HGNC Symbol%3BAcc:HGNC:9839]	GO:0031532:obsolete actin cytoskeleton reorganization;GO:0007049:cell cycle;GO:0051301:cell division;GO:0006935:chemotaxis;GO:0072655:establishment of protein localization to mitochondrion;GO:0006887:exocytosis;GO:0051665:membrane raft localization;GO:0001843:neural tube closure;GO:0051491:positive regulation of filopodium assembly;GO:0090141:positive regulation of mitochondrial fission;GO:000726…	GO:0009986:cell surface;GO:0032154:cleavage furrow;GO:0030659:cytoplasmic vesicle membrane;GO:0070062:extracellular exosome;GO:0090543:Flemming body;GO:0005925:focal adhesion;GO:0005739:mitochondrion;GO:0005886:plasma membrane;	GO:0051117:ATPase binding;GO:0031755:Edg-2 lysophosphatidic acid receptor binding;GO:0003925:G protein activity;GO:0019003:GDP binding;GO:0005525:GTP binding;GO:0003924:GTPase activity;GO:0017022:myosin binding;GO:0031625:ubiquitin protein ligase binding;	K07834	;ko04014 Ras signaling pathway;ko04015 Rap1 signaling pathway;ko04072 Phospholipase D signaling pathway;ko05132 Salmonella infection;ko05200 Pathways in cancer;ko05210 Colorectal cancer;ko05212 Pancreatic cancer;
ENSG00000006453	4821	844	11.82	1059	11	1203	11.31	981	11.65	855	11.66	896	11.83	935	11.28	902	12.18	916	11.13	877	10.72	1019	11.17	859	10.55	1157	11.59	1005	11.81	1034	11.93	7	98291650	98401090	-	BAIAP2L1	BAR/IMD domain containing adaptor protein 2 like 1 [Source:HGNC Symbol%3BAcc:HGNC:21649]	GO:0051764:actin crosslink formation;GO:0051017:actin filament bundle assembly;GO:0007009:plasma membrane organization;GO:2000251:obsolete positive regulation of actin cytoskeleton reorganization;GO:0030838:positive regulation of actin filament polymerization;GO:0046626:regulation of insulin receptor signaling pathway;GO:0009617:response to bacterium;	GO:0005912:adherens junction;GO:0005856:cytoskeleton;GO:0005829:cytosol;GO:0070062:extracellular exosome;GO:0005654:nucleoplasm;GO:0005886:plasma membrane;GO:0015629:actin cytoskeleton;	GO:0003779:actin binding;GO:0098641:cadherin binding involved in cell-cell adhesion;GO:0070064:proline-rich region binding;	K01557;K04460	;ko00350 Tyrosine metabolism;ko01100 Metabolic pathways;;ko04010 MAPK signaling pathway;
ENSG00000006459	9378	66	0.48	93	0.5	131	0.63	100	0.61	76	0.53	72	0.49	100	0.62	76	0.53	81	0.51	119	0.75	111	0.63	95	0.6	86	0.44	80	0.48	53	0.31	7	140084746	140176983	-	KDM7A	lysine demethylase 7A [Source:HGNC Symbol%3BAcc:HGNC:22224]	GO:0071557:histone H3-K27 demethylation;GO:0070544:histone H3-K36 demethylation;GO:0033169:histone H3-K9 demethylation;GO:0035574:obsolete histone H4-K20 demethylation;GO:0030901:midbrain development;GO:0045893:positive regulation of DNA-templated transcription;GO:0006482:protein demethylation;GO:0006357:regulation of transcription by RNA polymerase II;	GO:0005730:nucleolus;GO:0005654:nucleoplasm;GO:0005634:nucleus;	GO:0016706:2-oxoglutarate-dependent dioxygenase activity;GO:0032452:histone demethylase activity;GO:0071558:histone H3K27me2/H3K27me3 demethylase activity;GO:0051864:histone H3K36 demethylase activity;GO:0032454:histone H3K9 demethylase activity;GO:0035575:histone H4K20 demethylase activity;GO:0005506:iron ion binding;GO:0035064:methylated histone binding;GO:0003712:transcription coregulator acti…	K11445	-
ENSG00000006468	9615	754	5.29	1070	5.57	1138	5.37	755	4.5	798	5.46	808	5.35	871	5.27	784	5.31	814	4.96	987	6.05	912	5.01	937	5.77	971	4.88	760	4.48	781	4.52	7	13891229	13991425	-	ETV1	ETS variant transcription factor 1 [Source:HGNC Symbol%3BAcc:HGNC:3490]	GO:0007411:axon guidance;GO:0030154:cell differentiation;GO:0007638:mechanosensory behavior;GO:0007517:muscle organ development;GO:0048935:peripheral nervous system neuron development;GO:0045944:positive regulation of transcription by RNA polymerase II;GO:0006357:regulation of transcription by RNA polymerase II;GO:0006366:transcription by RNA polymerase II;	GO:0000785:chromatin;GO:0005634:nucleus;	GO:0001228:DNA-binding transcription activator activity, RNA polymerase II-specific;GO:0003700:DNA-binding transcription factor activity;GO:0000981:DNA-binding transcription factor activity, RNA polymerase II-specific;GO:0000978:RNA polymerase II cis-regulatory region sequence-specific DNA binding;GO:1990837:sequence-specific double-stranded DNA binding;	K09431	;ko05202 Transcriptional misregulation in cancer;
ENSG00000006530	10697	500	3.16	630	2.95	761	3.23	538	2.88	504	3.1	450	2.68	508	2.76	452	2.75	511	2.8	572	3.15	577	2.85	551	3.05	629	2.84	569	3.01	599	3.12	7	141551278	141655244	+	AGK	acylglycerol kinase [Source:HGNC Symbol%3BAcc:HGNC:21869]	GO:0046513:ceramide biosynthetic process;GO:0046486:glycerolipid metabolic process;GO:0016310:phosphorylation;GO:0045039:protein insertion into mitochondrial inner membrane;GO:0006665:sphingolipid metabolic process;GO:0046834:lipid phosphorylation;	GO:0005737:cytoplasm;GO:0005829:cytosol;GO:0031305:obsolete integral component of mitochondrial inner membrane;GO:0043231:intracellular membrane-bounded organelle;GO:0016020:membrane;GO:0005743:mitochondrial inner membrane;GO:0005758:mitochondrial intermembrane space;GO:0031966:mitochondrial membrane;GO:0005741:mitochondrial outer membrane;GO:0005739:mitochondrion;GO:0042721:TIM22 mitochondrial i…	GO:0047620:acylglycerol kinase activity;GO:0005524:ATP binding;GO:0001729:ceramide kinase activity;GO:0004143:ATP-dependent diacylglycerol kinase activity;GO:0102773:dihydroceramide kinase activity;GO:0001727:lipid kinase activity;GO:0003951:NAD+ kinase activity;	K09881	;ko00561 Glycerolipid metabolism;ko01100 Metabolic pathways;
ENSG00000006534	6622	1609	16.4	2077	15.7	2421	16.58	1945	16.82	1878	18.65	1810	17.39	2033	17.86	1732	17.03	1625	14.38	1777	15.81	2145	17.12	1654	14.79	3090	22.54	2676	22.9	2535	21.3	11	68008578	68029282	+	ALDH3B1	aldehyde dehydrogenase 3 family member B1 [Source:HGNC Symbol%3BAcc:HGNC:410]	GO:0006066:alcohol metabolic process;GO:0046185:aldehyde catabolic process;GO:0034599:cellular response to oxidative stress;GO:0006068:ethanol catabolic process;GO:0006629:lipid metabolic process;GO:0006979:response to oxidative stress;GO:0030148:sphingolipid biosynthetic process;	GO:0005737:cytoplasm;GO:0005829:cytosol;GO:0070062:extracellular exosome;GO:0005886:plasma membrane;GO:0030667:secretory granule membrane;GO:0035579:specific granule membrane;GO:0031982:vesicle;	GO:0004028:3-chloroallyl aldehyde dehydrogenase activity;GO:0004030:aldehyde dehydrogenase [NAD(P)+] activity;GO:0018479:benzaldehyde dehydrogenase (NAD+) activity;GO:0018477:benzaldehyde dehydrogenase (NADP+) activity;	K00129	;ko00010 Glycolysis / Gluconeogenesis;ko00340 Histidine metabolism;ko00350 Tyrosine metabolism;ko00360 Phenylalanine metabolism;ko00410 beta-Alanine metabolism;ko00980 Metabolism of xenobiotics by cytochrome P450;ko00982 Drug metabolism - cytochrome P450;ko01100 Metabolic pathways;
ENSG00000006555	6111	0	0	1	0.01	0	0	1	0.01	0	0	3	0.03	0	0	1	0.01	0	0	0	0	2	0.02	4	0.04	0	0	0	0	0	0	1	54779712	54801323	-	TTC22	tetratricopeptide repeat domain 22 [Source:HGNC Symbol%3BAcc:HGNC:26067]	-	-	-	K12581	;ko03018 RNA degradation;
ENSG00000006576	8665	1129	8.8	1742	10.06	1883	9.85	1192	7.88	1207	9.16	1245	9.14	1526	10.25	1410	10.6	1358	9.18	1574	10.7	1452	8.86	1391	9.51	1806	10.07	1464	9.57	1540	9.89	7	77798773	77957503	+	PHTF2	putative homeodomain transcription factor 2 [Source:HGNC Symbol%3BAcc:HGNC:13411]	-	GO:0005783:endoplasmic reticulum;	-	K09228	;ko05168 Herpes simplex virus 1 infection;
ENSG00000006606	703	1	0.1	2	0.14	0	0	1	0.08	0	0	0	0	2	0.17	0	0	0	0	0	0	1	0.08	0	0	0	0	0	0	0	0	7	75769533	75789896	-	CCL26	C-C motif chemokine ligand 26 [Source:HGNC Symbol%3BAcc:HGNC:10625]	GO:0007267:cell-cell signaling;GO:0071346:cellular response to type II interferon;GO:0071347:cellular response to interleukin-1;GO:0071356:cellular response to tumor necrosis factor;GO:0070098:chemokine-mediated signaling pathway;GO:0006935:chemotaxis;GO:0048245:eosinophil chemotaxis;GO:0007186:G protein-coupled receptor signaling pathway;GO:0006954:inflammatory response;GO:0048247:lymphocyte che…	GO:0005615:extracellular space;	GO:0048020:CCR chemokine receptor binding;GO:0031728:CCR3 chemokine receptor binding;GO:0008009:chemokine activity;GO:0031737:CX3C chemokine receptor binding;GO:0048018:receptor ligand activity;	K05514	;ko04060 Cytokine-cytokine receptor interaction;ko04061 Viral protein interaction with cytokine and cytokine receptor;ko04062 Chemokine signaling pathway;
ENSG00000006607	14371	653	3.07	856	2.98	873	2.75	730	2.91	637	2.91	631	2.79	730	2.96	674	3.05	767	3.13	703	2.88	889	3.27	722	2.98	918	3.09	805	3.17	786	3.04	2	241356285	241494841	+	FARP2	FERM%2C ARH/RhoGEF and pleckstrin domain protein 2 [Source:HGNC Symbol%3BAcc:HGNC:16460]	GO:0031532:obsolete actin cytoskeleton reorganization;GO:0007155:cell adhesion;GO:0022405:hair cycle process;GO:0016322:neuron remodeling;GO:0030316:osteoclast differentiation;GO:0071800:podosome assembly;GO:0016601:Rac protein signal transduction;GO:0033623:regulation of integrin activation;GO:0071526:semaphorin-plexin signaling pathway;	GO:0005737:cytoplasm;GO:0005856:cytoskeleton;GO:0005829:cytosol;	GO:0008092:cytoskeletal protein binding;GO:0005085:guanyl-nucleotide exchange factor activity;	K06082	;ko04015 Rap1 signaling pathway;ko04520 Adherens junction;
ENSG00000006611	4904	42	0.58	61	0.62	69	0.64	80	0.93	43	0.58	54	0.7	58	0.69	67	0.89	64	0.76	56	0.67	53	0.57	51	0.62	76	0.75	85	0.98	89	1.01	11	17493895	17544416	-	USH1C	USH1 protein network component harmonin [Source:HGNC Symbol%3BAcc:HGNC:12597]	GO:0051017:actin filament bundle assembly;GO:1904970:brush border assembly;GO:0050957:equilibrioception;GO:0000086:G2/M transition of mitotic cell cycle;GO:0042491:inner ear auditory receptor cell differentiation;GO:0042472:inner ear morphogenesis;GO:0060122:inner ear receptor cell stereocilium organization;GO:0050885:neuromuscular process controlling balance;GO:0030046:parallel actin filament bu…	GO:0045177:apical part of cell;GO:0005903:brush border;GO:0005737:cytoplasm;GO:0005856:cytoskeleton;GO:0005829:cytosol;GO:0005902:microvillus;GO:0001917:photoreceptor inner segment;GO:0001750:photoreceptor outer segment;GO:0005886:plasma membrane;GO:0002142:stereocilia ankle link complex;GO:0032420:stereocilium;GO:0032426:stereocilium tip;GO:0045202:synapse;GO:1990435:upper tip-link density;	GO:0051015:actin filament binding;GO:0032029:myosin tail binding;GO:0030507:spectrin binding;	-	-
ENSG00000006625	1594	1190	50.4	1695	53.23	1788	50.86	1196	42.97	1098	45.3	1161	46.34	1394	50.89	1250	51.07	1333	49	1317	48.67	1479	49.04	1341	49.83	1623	49.18	1439	51.16	1539	53.72	7	30496621	30504841	-	GGCT	gamma-glutamylcyclotransferase [Source:HGNC Symbol%3BAcc:HGNC:21705]	GO:0001836:release of cytochrome c from mitochondria;	GO:0005829:cytosol;GO:0070062:extracellular exosome;	GO:0003839:gamma-glutamylcyclotransferase activity;GO:0042803:protein homodimerization activity;	K00682	;ko00480 Glutathione metabolism;ko01100 Metabolic pathways;
ENSG00000006634	4595	1025	15.06	1566	17.06	1592	15.71	1074	13.39	1021	14.61	1003	13.89	1258	15.93	1125	15.94	1219	15.54	1200	15.38	1307	15.03	1201	15.48	1443	15.17	1156	14.26	1259	15.25	7	87876216	87909553	+	DBF4	DBF4 zinc finger [Source:HGNC Symbol%3BAcc:HGNC:17364]	GO:0006260:DNA replication;GO:0000082:G1/S transition of mitotic cell cycle;GO:0010571:positive regulation of nuclear cell cycle DNA replication;GO:1901987:regulation of cell cycle phase transition;	GO:0031431:Dbf4-dependent protein kinase complex;GO:0016604:nuclear body;GO:0005654:nucleoplasm;GO:0005634:nucleus;	GO:0008047:enzyme activator activity;GO:0003676:nucleic acid binding;GO:0043539:protein serine/threonine kinase activator activity;GO:0008270:zinc ion binding;	K06629	;ko04110 Cell cycle;
ENSG00000006638	2827	147	3.51	157	2.78	227	3.64	163	3.3	161	3.75	209	4.7	198	4.08	128	2.95	166	3.44	162	3.38	178	3.33	181	3.79	219	3.74	171	3.43	178	3.5	19	3594507	3606875	-	TBXA2R	thromboxane A2 receptor [Source:HGNC Symbol%3BAcc:HGNC:11608]	GO:0007189:adenylate cyclase-activating G protein-coupled receptor signaling pathway;GO:0071222:cellular response to lipopolysaccharide;GO:0007186:G protein-coupled receptor signaling pathway;GO:0006954:inflammatory response;GO:0090051:negative regulation of cell migration involved in sprouting angiogenesis;GO:0045766:positive regulation of angiogenesis;GO:0030194:positive regulation of blood coa…	GO:0001669:acrosomal vesicle;GO:0016607:nuclear speck;GO:0005886:plasma membrane;	GO:0005085:guanyl-nucleotide exchange factor activity;GO:0004961:thromboxane A2 receptor activity;	K04264	;ko04020 Calcium signaling pathway;ko04080 Neuroactive ligand-receptor interaction;ko04611 Platelet activation;
ENSG00000006652	7902	1090	9.31	1591	10.08	1598	9.17	1205	8.73	1119	9.31	1240	9.98	1345	9.9	1185	9.77	1287	9.54	1682	12.54	1489	9.96	1418	10.63	1745	10.67	1251	8.97	1298	9.14	7	112422887	112481017	+	IFRD1	interferon related developmental regulator 1 [Source:HGNC Symbol%3BAcc:HGNC:5456]	GO:0007518:myoblast fate determination;GO:0006357:regulation of transcription by RNA polymerase II;GO:0030154:cell differentiation;GO:0042692:muscle cell differentiation;GO:0030517:negative regulation of axon extension;GO:0048671:negative regulation of collateral sprouting;GO:0051091:positive regulation of DNA-binding transcription factor activity;GO:0045944:positive regulation of transcription b…	GO:0005634:nucleus;GO:0005737:cytoplasm;	GO:0061629:RNA polymerase II-specific DNA-binding transcription factor binding;	K01557;K12756	;ko00350 Tyrosine metabolism;ko01100 Metabolic pathways;;ko04510 Focal adhesion;ko04520 Adherens junction;ko04670 Leukocyte transendothelial migration;ko04810 Regulation of actin cytoskeleton;ko04814 Motor proteins;ko05131 Shigellosis;ko05132 Salmonella infection;
ENSG00000006659	904	0	0	0	0	0	0	0	0	0	0	0	0	0	0	0	0	0	0	0	0	0	0	0	0	0	0	0	0	0	0	19	39704481	39709444	+	LGALS14	galectin 14 [Source:HGNC Symbol%3BAcc:HGNC:30054]	GO:0006915:apoptotic process;GO:0070234:positive regulation of T cell apoptotic process;	GO:0005654:nucleoplasm;	GO:0030246:carbohydrate binding;	K10097	-
ENSG00000006695	6756	483	4.83	606	4.49	708	4.75	637	5.4	557	5.42	546	5.14	517	4.45	475	4.58	553	4.8	609	5.31	662	5.18	551	4.83	586	4.19	485	4.07	596	4.91	17	14069490	14231736	+	COX10	cytochrome c oxidase assembly factor heme A:farnesyltransferase COX10 [Source:HGNC Symbol%3BAcc:HGNC:2260]	GO:0009060:aerobic respiration;GO:0045333:cellular respiration;GO:0006784:heme A biosynthetic process;GO:0006783:heme biosynthetic process;GO:0048034:heme O biosynthetic process;GO:0000266:mitochondrial fission;GO:0008535:respiratory chain complex IV assembly;	GO:0070069:cytochrome complex;GO:0005829:cytosol;GO:0005743:mitochondrial inner membrane;GO:0005739:mitochondrion;GO:0005730:nucleolus;	GO:0004311:farnesyltranstransferase activity;GO:0008495:protoheme IX farnesyltransferase activity;	K02257;K08857	-
ENSG00000006704	6499	1116	11.59	1453	11.19	1797	12.54	1359	11.98	1097	11.1	1235	12.09	1323	11.84	1143	11.45	1228	11.07	1223	11.09	1420	11.55	1152	10.5	1661	12.34	1429	12.46	1419	12.15	7	74453790	74602605	+	GTF2IRD1	GTF2I repeat domain containing 1 [Source:HGNC Symbol%3BAcc:HGNC:4661]	GO:0000122:negative regulation of transcription by RNA polymerase II;GO:0006355:regulation of DNA-templated transcription;GO:0006366:transcription by RNA polymerase II;GO:0014886:transition between slow and fast fiber;	GO:0005829:cytosol;GO:0005654:nucleoplasm;GO:0005634:nucleus;	GO:0003700:DNA-binding transcription factor activity;GO:0000981:DNA-binding transcription factor activity, RNA polymerase II-specific;GO:0001227:DNA-binding transcription repressor activity, RNA polymerase II-specific;GO:0000978:RNA polymerase II cis-regulatory region sequence-specific DNA binding;	K03121	;ko03022 Basal transcription factors;ko04022 cGMP-PKG signaling pathway;
ENSG00000006712	2850	999	23.66	1338	23.5	1467	23.34	1293	25.99	1050	24.23	1034	23.08	1129	23.05	1110	25.36	1191	24.49	1104	22.82	1207	22.38	1109	23.05	1301	22.05	1150	22.87	1221	23.84	19	39385629	39391154	-	PAF1	PAF1 homolog%2C Paf1/RNA polymerase II complex component [Source:HGNC Symbol%3BAcc:HGNC:25459]	GO:0071222:cellular response to lipopolysaccharide;GO:0001711:endodermal cell fate commitment;GO:0033523:histone H2B ubiquitination;GO:0010390:histone monoubiquitination;GO:0006378:mRNA polyadenylation;GO:0045638:negative regulation of myeloid cell differentiation;GO:0000122:negative regulation of transcription by RNA polymerase II;GO:0016584:obsolete nucleosome positioning;GO:1902808:positive re…	GO:0016593:Cdc73/Paf1 complex;GO:0030054:cell junction;GO:0005737:cytoplasm;GO:0016020:membrane;GO:0005654:nucleoplasm;	GO:0003682:chromatin binding;GO:0000993:RNA polymerase II complex binding;	K15174	-
ENSG00000006715	7752	833	7.25	1164	7.52	1237	7.24	986	7.29	801	6.79	816	6.7	917	6.88	832	6.99	884	6.68	892	6.78	1055	7.19	895	6.84	1255	7.82	1071	7.83	1115	8	7	38722974	38932394	-	VPS41	VPS41 subunit of HOPS complex [Source:HGNC Symbol%3BAcc:HGNC:12713]	GO:0009267:cellular response to starvation;GO:0034058:endosomal vesicle fusion;GO:0008333:endosome to lysosome transport;GO:0048193:Golgi vesicle transport;GO:1902774:late endosome to lysosome transport;GO:0016236:macroautophagy;GO:0006623:protein targeting to vacuole;GO:0045055:regulated exocytosis;	GO:0030123:AP-3 adaptor complex;GO:0030136:clathrin-coated vesicle;GO:0005829:cytosol;GO:0005769:early endosome;GO:0010008:endosome membrane;GO:0005794:Golgi apparatus;GO:0005798:Golgi-associated vesicle;GO:0030897:HOPS complex;GO:0005770:late endosome;GO:0031902:late endosome membrane;GO:1902501:lysosomal HOPS complex;GO:0005765:lysosomal membrane;GO:0005764:lysosome;GO:0016020:membrane;GO:00156…	GO:0042802:identical protein binding;GO:0046872:metal ion binding;GO:0008017:microtubule binding;GO:0043621:protein self-association;	K12581	;ko03018 RNA degradation;
ENSG00000006740	9322	121	0.88	184	0.99	218	1.06	155	0.95	171	1.21	139	0.95	166	1.04	128	0.89	144	0.91	146	0.92	171	0.97	156	0.99	195	1.01	175	1.06	178	1.06	17	12789498	12991643	+	ARHGAP44	Rho GTPase activating protein 44 [Source:HGNC Symbol%3BAcc:HGNC:29096]	GO:0006887:exocytosis;GO:0098886:modification of dendritic spine;GO:0099010:modification of postsynaptic structure;GO:0051490:negative regulation of filopodium assembly;GO:0035021:negative regulation of Rac protein signal transduction;GO:0098887:neurotransmitter receptor transport, endosome to postsynaptic membrane;GO:0032956:regulation of actin cytoskeleton organization;GO:0061001:regulation of …	GO:0030425:dendrite;GO:0043197:dendritic spine;GO:0098978:glutamatergic synapse;GO:0031256:leading edge membrane;GO:0014069:postsynaptic density;GO:0048786:presynaptic active zone;GO:0055037:recycling endosome;GO:0005829:cytosol;	GO:0005096:GTPase activator activity;GO:0005543:phospholipid binding;GO:0031267:small GTPase binding;	K06115	-
ENSG00000006744	7002	1630	15.71	2259	16.15	2495	16.16	1969	16.11	1512	14.2	1793	16.29	1892	15.72	1680	15.63	1922	16.08	1864	15.68	2195	16.57	1812	15.33	2153	14.85	1816	14.7	1980	15.73	17	12991612	13018065	-	ELAC2	elaC ribonuclease Z 2 [Source:HGNC Symbol%3BAcc:HGNC:14198]	GO:0072684:obsolete mitochondrial tRNA 3'-trailer cleavage, endonucleolytic;GO:0090646:mitochondrial tRNA processing;GO:0042780:tRNA 3'-end processing;GO:0016078:tRNA catabolic process;	GO:0005829:cytosol;GO:0005759:mitochondrial matrix;GO:0042645:mitochondrial nucleoid;GO:0005739:mitochondrion;GO:0005654:nucleoplasm;GO:0005634:nucleus;	GO:0042781:3'-tRNA processing endoribonuclease activity;GO:0004521:RNA endonuclease activity;GO:0046872:metal ion binding;GO:0003723:RNA binding;GO:0004549:tRNA-specific ribonuclease activity;	K00784	-
ENSG00000006747	11626	31	0.18	38	0.16	40	0.16	40	0.2	33	0.19	35	0.19	26	0.13	25	0.14	25	0.13	31	0.16	30	0.14	28	0.14	56	0.23	48	0.23	30	0.14	7	12570577	12660182	+	SCIN	scinderin [Source:HGNC Symbol%3BAcc:HGNC:21695]	GO:0051693:actin filament capping;GO:0051014:actin filament severing;GO:0045010:actin nucleation;GO:0008154:actin polymerization or depolymerization;GO:0051016:barbed-end actin filament capping;GO:0017156:calcium-ion regulated exocytosis;GO:0030031:cell projection assembly;GO:0007417:central nervous system development;GO:0008285:negative regulation of cell population proliferation;GO:0051127:posi…	GO:0015629:actin cytoskeleton;GO:0005938:cell cortex;GO:0030054:cell junction;GO:0042995:cell projection;GO:0005737:cytoplasm;GO:0070062:extracellular exosome;GO:0005886:plasma membrane;GO:0002102:podosome;GO:0032991:protein-containing complex;	GO:0005545:1-phosphatidylinositol binding;GO:0003779:actin binding;GO:0051015:actin filament binding;GO:0005509:calcium ion binding;GO:0005546:phosphatidylinositol-4,5-bisphosphate binding;GO:0001786:phosphatidylserine binding;	K05768	;ko04666 Fc gamma R-mediated phagocytosis;ko04810 Regulation of actin cytoskeleton;ko05203 Viral carcinogenesis;
ENSG00000006756	7026	0	0	0	0	0	0	0	0	0	0	0	0	0	0	0	0	0	0	0	0	0	0	0	0	0	0	0	0	0	0	X	2903972	2929349	-	ARSD	arylsulfatase D [Source:HGNC Symbol%3BAcc:HGNC:717]	-	GO:0005788:endoplasmic reticulum lumen;GO:0005764:lysosome;	GO:0004065:arylsulfatase activity;GO:0046872:metal ion binding;	K12374	-
ENSG00000006757	3411	168	3.32	275	4.04	238	3.16	198	3.32	158	3.05	188	3.51	211	3.6	137	2.62	207	3.56	178	3.07	233	3.61	183	3.18	257	3.64	231	3.84	289	4.71	X	7898247	7927739	-	PNPLA4	patatin like phospholipase domain containing 4 [Source:HGNC Symbol%3BAcc:HGNC:24887]	GO:0055088:lipid homeostasis;GO:0019433:triglyceride catabolic process;	GO:0005737:cytoplasm;GO:0005829:cytosol;GO:0005811:lipid droplet;GO:0016020:membrane;GO:0005739:mitochondrion;	GO:0047376:all-trans-retinyl-palmitate hydrolase, all-trans-retinol forming activity;GO:0050253:retinyl-palmitate esterase activity;GO:0004806:triglyceride lipase activity;	K11157	;ko00830 Retinol metabolism;ko01100 Metabolic pathways;
ENSG00000006788	6120	0	0	0	0	0	0	0	0	0	0	0	0	0	0	0	0	0	0	0	0	0	0	0	0	0	0	0	0	0	0	17	10300865	10373130	-	MYH13	myosin heavy chain 13 [Source:HGNC Symbol%3BAcc:HGNC:7571]	GO:0009267:cellular response to starvation;GO:0006936:muscle contraction;	GO:0070062:extracellular exosome;GO:0005859:muscle myosin complex;GO:0030016:myofibril;GO:0032982:myosin filament;	GO:0051015:actin filament binding;GO:0005524:ATP binding;GO:0005516:calmodulin binding;GO:0000146:microfilament motor activity;	K10352	;ko04270 Vascular smooth muscle contraction;ko04530 Tight junction;ko04810 Regulation of actin cytoskeleton;ko04814 Motor proteins;ko05130 Pathogenic Escherichia coli infection;
ENSG00000006831	5831	2118	24.52	2824	24.24	3164	24.6	2569	25.23	2189	24.69	2286	24.94	2549	25.44	2149	24	2477	24.89	2238	22.61	2715	24.61	2462	25.01	3014	24.97	2544	24.72	2586	24.68	12	1688574	1788674	+	ADIPOR2	adiponectin receptor 2 [Source:HGNC Symbol%3BAcc:HGNC:24041]	GO:0033211:adiponectin-activated signaling pathway;GO:0071398:cellular response to fatty acid;GO:0019395:fatty acid oxidation;GO:0007565:female pregnancy;GO:0042593:glucose homeostasis;GO:0007507:heart development;GO:0009755:hormone-mediated signaling pathway;GO:0030308:negative regulation of cell growth;GO:0010629:negative regulation of gene expression;GO:0061871:negative regulation of hepatic s…	GO:0031226:obsolete intrinsic component of plasma membrane;GO:0005886:plasma membrane;	GO:0097003:adipokinetic hormone receptor activity;GO:0055100:adiponectin binding;GO:0046872:metal ion binding;GO:0038023:signaling receptor activity;	K07297	;ko04152 AMPK signaling pathway;ko04211 Longevity regulating pathway;ko04920 Adipocytokine signaling pathway;ko04932 Non-alcoholic fatty liver disease;ko04936 Alcoholic liver disease;
ENSG00000006837	3149	22	0.47	29	0.46	29	0.42	21	0.38	22	0.46	23	0.46	31	0.57	18	0.37	25	0.47	19	0.36	22	0.37	33	0.62	43	0.66	39	0.7	25	0.44	5	134286350	134371047	-	CDKL3	cyclin dependent kinase like 3 [Source:HGNC Symbol%3BAcc:HGNC:15483]	GO:0097484:dendrite extension;GO:0030517:negative regulation of axon extension;GO:0050775:positive regulation of dendrite morphogenesis;GO:0006468:protein phosphorylation;	GO:0005737:cytoplasm;GO:0005634:nucleus;	GO:0005524:ATP binding;GO:0004693:cyclin-dependent protein serine/threonine kinase activity;GO:0004672:protein kinase activity;GO:0106310:protein serine kinase activity;	K08824	-
ENSG00000007001	2957	0	0	0	0	2	0.03	0	0	0	0	0	0	2	0.04	0	0	0	0	0	0	0	0	0	0	0	0	0	0	0	0	2	157876702	158136154	+	UPP2	uridine phosphorylase 2 [Source:HGNC Symbol%3BAcc:HGNC:23061]	GO:0006249:dCMP catabolic process;GO:0009116:nucleoside metabolic process;GO:0044206:UMP salvage;GO:0006218:uridine catabolic process;GO:0046108:uridine metabolic process;	GO:0005829:cytosol;GO:0045098:type III intermediate filament;	GO:0047847:deoxyuridine phosphorylase activity;GO:0042802:identical protein binding;GO:0004850:uridine phosphorylase activity;	K00757	;ko00240 Pyrimidine metabolism;ko00983 Drug metabolism - other enzymes;ko01100 Metabolic pathways;ko01232 Nucleotide metabolism;
ENSG00000007038	1967	1156	39.67	1568	39.9	1792	41.31	1433	41.73	1155	38.61	1236	39.98	1440	42.6	1162	38.47	1372	40.87	1331	39.86	1455	39.1	1316	39.63	1617	39.71	1288	37.11	1528	43.22	16	2817180	2826304	+	PRSS21	serine protease 21 [Source:HGNC Symbol%3BAcc:HGNC:9485]	GO:0006508:proteolysis;GO:0007283:spermatogenesis;	GO:0031225:obsolete anchored component of membrane;GO:0005737:cytoplasm;GO:0005576:extracellular region;GO:0005615:extracellular space;GO:0016020:membrane;GO:0005886:plasma membrane;	GO:0004252:serine-type endopeptidase activity;GO:0008236:serine-type peptidase activity;	K09625	-
ENSG00000007047	6656	158	1.6	207	1.56	244	1.66	213	1.83	164	1.62	174	1.66	168	1.47	190	1.86	197	1.73	157	1.39	205	1.63	185	1.65	233	1.69	173	1.47	182	1.52	19	45079288	45305284	+	MARK4	microtubule affinity regulating kinase 4 [Source:HGNC Symbol%3BAcc:HGNC:13538]	GO:0007049:cell cycle;GO:0051301:cell division;GO:0044782:cilium organization;GO:0035556:intracellular signal transduction;GO:0001578:microtubule bundle formation;GO:0000226:microtubule cytoskeleton organization;GO:0007399:nervous system development;GO:0045724:positive regulation of cilium assembly;GO:0043068:positive regulation of programmed cell death;GO:1904781:positive regulation of protein l…	GO:0005813:centrosome;GO:0036064:ciliary basal body;GO:0005737:cytoplasm;GO:0005829:cytosol;GO:0030425:dendrite;GO:0000930:gamma-tubulin complex;GO:0015630:microtubule cytoskeleton;GO:0005815:microtubule organizing center;GO:0030496:midbody;GO:0043005:neuron projection;	GO:0005524:ATP binding;GO:0043015:gamma-tubulin binding;GO:0008017:microtubule binding;GO:0106310:protein serine kinase activity;GO:0004674:protein serine/threonine kinase activity;GO:0048156:tau protein binding;GO:0050321:tau-protein kinase activity;GO:0043130:ubiquitin binding;	K08798	-
ENSG00000007062	7457	6	0.05	2	0.01	4	0.02	8	0.06	5	0.04	2	0.02	5	0.04	3	0.03	1	0.01	6	0.05	7	0.05	5	0.04	5	0.03	6	0.05	10	0.07	4	15963076	16084378	-	PROM1	prominin 1 [Source:HGNC Symbol%3BAcc:HGNC:9454]	GO:0060219:camera-type eye photoreceptor cell differentiation;GO:0072139:glomerular parietal epithelial cell differentiation;GO:0072112:podocyte differentiation;GO:0045494:photoreceptor cell maintenance;GO:2000768:positive regulation of nephron tubule epithelial cell differentiation;GO:0010842:retina layer formation;GO:0060042:retina morphogenesis in camera-type eye;	GO:0016324:apical plasma membrane;GO:0009986:cell surface;GO:0005929:cilium;GO:0005783:endoplasmic reticulum;GO:0005793:endoplasmic reticulum-Golgi intermediate compartment;GO:0070062:extracellular exosome;GO:0005615:extracellular space;GO:0005902:microvillus;GO:0031528:microvillus membrane;GO:0001750:photoreceptor outer segment;GO:0042622:photoreceptor outer segment membrane;GO:0005886:plasma me…	GO:0042805:actinin binding;GO:0045296:cadherin binding;GO:0015485:cholesterol binding;	K06532	;ko05202 Transcriptional misregulation in cancer;
ENSG00000007080	1661	509	20.69	705	21.25	744	20.31	623	21.48	485	19.2	444	17.01	610	21.37	545	21.37	568	20.04	609	21.6	619	19.7	547	19.51	731	21.26	533	18.18	595	19.93	19	17933015	17943991	+	CCDC124	coiled-coil domain containing 124 [Source:HGNC Symbol%3BAcc:HGNC:25171]	GO:0007049:cell cycle;GO:0051301:cell division;	GO:0005829:cytosol;GO:0005815:microtubule organizing center;GO:0030496:midbody;GO:0005886:plasma membrane;	-	K01081;K12581	;ko00230 Purine metabolism;ko00240 Pyrimidine metabolism;ko00760 Nicotinate and nicotinamide metabolism;ko01100 Metabolic pathways;ko01232 Nucleotide metabolism;;ko03018 RNA degradation;
ENSG00000007129	1977	0	0	0	0	0	0	0	0	0	0	0	0	0	0	0	0	0	0	0	0	0	0	0	0	0	0	0	0	0	0	19	41549518	41586844	+	CEACAM21	CEA cell adhesion molecule 21 [Source:HGNC Symbol%3BAcc:HGNC:28834]	-	-	-	K06499	-
ENSG00000007168	13771	4055	19.88	5328	19.37	5950	19.59	4784	19.9	4070	19.44	4290	19.82	4483	18.94	4338	20.51	4591	19.53	4456	19.06	4881	18.73	4419	19.01	6006	21.07	4972	20.46	4921	19.88	17	2593210	2685615	+	PAFAH1B1	platelet activating factor acetylhydrolase 1b regulatory subunit 1 [Source:HGNC Symbol%3BAcc:HGNC:8574]	GO:0001675:acrosome assembly;GO:0030036:actin cytoskeleton organization;GO:0008344:adult locomotory behavior;GO:0001667:ameboidal-type cell migration;GO:0060117:auditory receptor cell development;GO:0048854:brain morphogenesis;GO:0051301:cell division;GO:0007268:chemical synaptic transmission;GO:0090102:cochlea development;GO:0021540:corpus callosum morphogenesis;GO:0043622:cortical microtubule o…	GO:0008247:1-alkyl-2-acetylglycerophosphocholine esterase complex;GO:0000235:astral microtubule;GO:1904115:axon cytoplasm;GO:0005938:cell cortex;GO:0031252:cell leading edge;GO:0005813:centrosome;GO:0005881:cytoplasmic microtubule;GO:0000776:kinetochore;GO:0005875:microtubule associated complex;GO:0031514:motile cilium;GO:0043005:neuron projection;GO:0043025:neuronal cell body;GO:0005635:nuclear …	GO:0070840:dynein complex binding;GO:0042802:identical protein binding;GO:0051010:microtubule plus-end binding;GO:0051219:phosphoprotein binding;GO:0046982:protein heterodimerization activity;GO:0034452:dynactin binding;GO:0045505:dynein intermediate chain binding;GO:0008201:heparin binding;GO:0008017:microtubule binding;GO:0043274:phospholipase binding;	K16794;K09488	;ko00565 Ether lipid metabolism;ko01100 Metabolic pathways;;ko05012 Parkinson disease;ko05022 Pathways of neurodegeneration - multiple diseases;
ENSG00000007171	6129	0	0	0	0	0	0	0	0	0	0	0	0	0	0	0	0	0	0	0	0	0	0	0	0	0	0	0	0	0	0	17	27756766	27800529	-	NOS2	nitric oxide synthase 2 [Source:HGNC Symbol%3BAcc:HGNC:7873]	GO:0006527:arginine catabolic process;GO:0045454:cell redox homeostasis;GO:0071346:cellular response to type II interferon;GO:0071222:cellular response to lipopolysaccharide;GO:0007623:circadian rhythm;GO:0042742:defense response to bacterium;GO:0050829:defense response to Gram-negative bacterium;GO:0006954:inflammatory response;GO:0002227:innate immune response in mucosa;GO:0045776:negative regu…	GO:0030863:cortical cytoskeleton;GO:0005737:cytoplasm;GO:0005829:cytosol;GO:0005654:nucleoplasm;GO:0005634:nucleus;GO:0048471:perinuclear region of cytoplasm;GO:0005782:peroxisomal matrix;GO:0005777:peroxisome;GO:0005886:plasma membrane;GO:0012506:vesicle membrane;	GO:0034618:arginine binding;GO:0005516:calmodulin binding;GO:0050660:flavin adenine dinucleotide binding;GO:0010181:FMN binding;GO:0020037:heme binding;GO:0046872:metal ion binding;GO:0050661:NADP binding;GO:0004517:nitric-oxide synthase activity;GO:0016491:oxidoreductase activity;GO:0016709:oxidoreductase activity, acting on paired donors, with incorporation or reduction of molecular oxygen, NAD…	K13241	;ko00220 Arginine biosynthesis;ko00330 Arginine and proline metabolism;ko01100 Metabolic pathways;ko04020 Calcium signaling pathway;ko04066 HIF-1 signaling pathway;ko04146 Peroxisome;ko04371 Apelin signaling pathway;ko04926 Relaxin signaling pathway;ko05010 Alzheimer disease;ko05014 Amyotrophic lateral sclerosis;ko05022 Pathways of neurodegeneration - multiple diseases;ko05133 Pertussis;ko05140 L…
ENSG00000007174	16941	0	0	0	0	0	0	0	0	0	0	0	0	0	0	0	0	0	0	0	0	0	0	0	0	0	0	0	0	0	0	17	11598470	11969748	+	DNAH9	dynein axonemal heavy chain 9 [Source:HGNC Symbol%3BAcc:HGNC:2953]	GO:0030030:cell projection organization;GO:0003341:cilium movement;GO:0007018:microtubule-based movement;	GO:0097729:9+2 motile cilium;GO:0005930:axoneme;GO:0120135:distal portion of axoneme;GO:0030286:dynein complex;GO:0005874:microtubule;GO:0031514:motile cilium;GO:0036157:outer dynein arm;	GO:0005524:ATP binding;GO:0008569:minus-end-directed microtubule motor activity;GO:0045505:dynein intermediate chain binding;GO:0051959:dynein light intermediate chain binding;	K10408	;ko04814 Motor proteins;ko05014 Amyotrophic lateral sclerosis;ko05016 Huntington disease;ko05022 Pathways of neurodegeneration - multiple diseases;
ENSG00000007202	9232	3358	24.55	4467	24.22	5134	25.21	3772	23.4	3162	22.52	3402	23.45	3792	23.9	3516	24.8	3867	24.54	3674	23.44	4060	23.24	3625	23.26	4374	22.88	3850	23.63	4026	24.27	17	28614446	28645454	-	KIAA0100	KIAA0100 [Source:HGNC Symbol%3BAcc:HGNC:28960]	-	GO:0005576:extracellular region;	-	K18263	-
ENSG00000007216	3226	0	0	0	0	1	0.01	0	0	1	0.02	0	0	0	0	0	0	0	0	1	0.02	0	0	0	0	0	0	0	0	2	0.03	17	28473293	28497781	+	SLC13A2	solute carrier family 13 member 2 [Source:HGNC Symbol%3BAcc:HGNC:10917]	GO:0098656:monoatomic anion transmembrane transport;GO:0071422:succinate transmembrane transport;	GO:0070062:extracellular exosome;GO:0016020:membrane;GO:0005886:plasma membrane;	GO:0015361:low-affinity sodium:dicarboxylate symporter activity;GO:0015141:succinate transmembrane transporter activity;	K14445	-
ENSG00000007237	10158	29	0.19	34	0.17	36	0.16	41	0.23	30	0.19	30	0.19	36	0.21	44	0.28	56	0.32	26	0.15	35	0.18	20	0.12	63	0.3	64	0.36	51	0.28	17	9910606	10198606	-	GAS7	growth arrest specific 7 [Source:HGNC Symbol%3BAcc:HGNC:4169]	GO:0030041:actin filament polymerization;GO:0048812:neuron projection morphogenesis;GO:0051017:actin filament bundle assembly;GO:0030182:neuron differentiation;GO:0008360:regulation of cell shape;	GO:0005884:actin filament;GO:0005737:cytoplasm;GO:0005886:plasma membrane;GO:0001726:ruffle;	GO:0051015:actin filament binding;GO:0042802:identical protein binding;	K18618	-
ENSG00000007255	933	6	0.43	8	0.43	18	0.87	10	0.61	10	0.7	12	0.82	8	0.5	10	0.7	10	0.63	11	0.69	8	0.45	7	0.44	12	0.62	21	1.28	12	0.72	19	45162928	45178237	-	TRAPPC6A	trafficking protein particle complex subunit 6A [Source:HGNC Symbol%3BAcc:HGNC:23069]	GO:0006888:endoplasmic reticulum to Golgi vesicle-mediated transport;GO:1903232:melanosome assembly;GO:0043087:regulation of GTPase activity;	GO:0005801:cis-Golgi network;GO:0005829:cytosol;GO:0005783:endoplasmic reticulum;GO:0005802:trans-Golgi network;GO:0030008:TRAPP complex;	-	-	-
ENSG00000007264	4138	0	0	0	0	0	0	0	0	0	0	0	0	0	0	0	0	0	0	0	0	0	0	0	0	0	0	0	0	0	0	19	3777970	3802129	-	MATK	megakaryocyte-associated tyrosine kinase [Source:HGNC Symbol%3BAcc:HGNC:6906]	GO:0008284:positive regulation of cell population proliferation;GO:0006468:protein phosphorylation;	GO:0005829:cytosol;GO:0016020:membrane;	GO:0005524:ATP binding;GO:0004715:non-membrane spanning protein tyrosine kinase activity;GO:0004713:protein tyrosine kinase activity;GO:0004714:transmembrane receptor protein tyrosine kinase activity;	K08888;K17985;K17692	;ko04722 Neurotrophin signaling pathway;;ko04137 Mitophagy - animal;ko04140 Autophagy - animal;ko05010 Alzheimer disease;ko05014 Amyotrophic lateral sclerosis;ko05016 Huntington disease;ko05017 Spinocerebellar ataxia;ko05022 Pathways of neurodegeneration - multiple diseases;;ko05204 Chemical carcinogenesis - DNA adducts;
ENSG00000007306	2653	0	0	0	0	0	0	0	0	0	0	0	0	0	0	0	0	0	0	0	0	0	0	0	0	0	0	0	0	0	0	19	41673303	41706976	-	CEACAM7	CEA cell adhesion molecule 7 [Source:HGNC Symbol%3BAcc:HGNC:1819]	-	GO:0031225:obsolete anchored component of membrane;GO:0016324:apical plasma membrane;GO:0005576:extracellular region;GO:0005886:plasma membrane;	-	K06499	-
ENSG00000007312	2125	0	0	0	0	3	0.06	0	0	0	0	0	0	0	0	0	0	0	0	0	0	0	0	0	0	0	0	0	0	0	0	17	63928738	63932336	-	CD79B	CD79b molecule [Source:HGNC Symbol%3BAcc:HGNC:1699]	GO:0002250:adaptive immune response;GO:0030183:B cell differentiation;GO:0050853:B cell receptor signaling pathway;GO:0006955:immune response;GO:0007165:signal transduction;	GO:0019815:B cell receptor complex;GO:0005829:cytosol;GO:0009897:external side of plasma membrane;GO:0070062:extracellular exosome;GO:0005654:nucleoplasm;GO:0005886:plasma membrane;	GO:0042802:identical protein binding;GO:0004888:transmembrane signaling receptor activity;	K06507	;ko04662 B cell receptor signaling pathway;
ENSG00000007314	8243	0	0	0	0	0	0	0	0	0	0	0	0	0	0	0	0	0	0	0	0	0	0	0	0	0	0	0	0	0	0	17	63938554	63972918	-	SCN4A	sodium voltage-gated channel alpha subunit 4 [Source:HGNC Symbol%3BAcc:HGNC:10591]	GO:0086010:membrane depolarization during action potential;GO:0006936:muscle contraction;GO:0019228:neuronal action potential;GO:0034765:regulation of monoatomic ion transmembrane transport;GO:0100001:regulation of skeletal muscle contraction by action potential;GO:0035725:sodium ion transmembrane transport;GO:0006814:sodium ion transport;	GO:0030424:axon;GO:0001518:voltage-gated sodium channel complex;	GO:0005244:voltage-gated monoatomic ion channel activity;GO:0005248:voltage-gated sodium channel activity;	K04837	-
ENSG00000007341	8108	433	3.61	593	3.66	623	3.48	548	3.87	443	3.59	431	3.38	470	3.37	465	3.73	469	3.39	545	3.96	593	3.87	537	3.92	556	3.31	500	3.49	510	3.5	1	112523514	112620825	-	ST7L	suppression of tumorigenicity 7 like [Source:HGNC Symbol%3BAcc:HGNC:18441]	GO:0030308:negative regulation of cell growth;	-	-	K17985	;ko04137 Mitophagy - animal;ko04140 Autophagy - animal;ko05010 Alzheimer disease;ko05014 Amyotrophic lateral sclerosis;ko05016 Huntington disease;ko05017 Spinocerebellar ataxia;ko05022 Pathways of neurodegeneration - multiple diseases;
ENSG00000007350	3526	1	0.02	0	0	0	0	1	0.02	0	0	0	0	0	0	0	0	0	0	0	0	0	0	0	0	0	0	0	0	0	0	X	154295795	154330350	+	TKTL1	transketolase like 1 [Source:HGNC Symbol%3BAcc:HGNC:11835]	GO:0006007:glucose catabolic process;GO:0006772:thiamine metabolic process;	GO:0005829:cytosol;GO:0005634:nucleus;	GO:0046872:metal ion binding;GO:0030976:thiamine pyrophosphate binding;GO:0004802:transketolase activity;	K00615	;ko00030 Pentose phosphate pathway;ko01100 Metabolic pathways;ko01200 Carbon metabolism;ko01230 Biosynthesis of amino acids;
ENSG00000007372	20639	306	1	352	0.85	455	1	264	0.73	252	0.8	287	0.88	383	1.08	295	0.93	332	0.94	307	0.88	347	0.89	302	0.87	380	0.89	349	0.96	356	0.96	11	31784779	31817961	-	PAX6	paired box 6 [Source:HGNC Symbol%3BAcc:HGNC:8620]	GO:0048856:anatomical structure development;GO:0009887:animal organ morphogenesis;GO:0048708:astrocyte differentiation;GO:0007411:axon guidance;GO:0009952:anterior/posterior pattern specification;GO:0021538:epithalamus development;GO:0030900:forebrain development;GO:0021986:habenula development;GO:0030902:hindbrain development;GO:0008284:positive regulation of cell population proliferation;GO:004…	GO:0000785:chromatin;GO:0005737:cytoplasm;GO:0005829:cytosol;GO:0005654:nucleoplasm;GO:0005634:nucleus;	GO:0003682:chromatin binding;GO:0070410:co-SMAD binding;GO:0003677:DNA binding;GO:0001228:DNA-binding transcription activator activity, RNA polymerase II-specific;GO:0000981:DNA-binding transcription factor activity, RNA polymerase II-specific;GO:0000978:RNA polymerase II cis-regulatory region sequence-specific DNA binding;GO:0043565:sequence-specific DNA binding;	K08031	;ko04550 Signaling pathways regulating pluripotency of stem cells;ko04950 Maturity onset diabetes of the young;
ENSG00000007376	2769	233	5.68	304	5.5	384	6.29	253	5.23	255	6.06	246	5.65	239	5.02	238	5.6	239	5.06	272	5.79	383	7.31	287	6.14	366	6.38	273	5.59	287	5.77	16	784974	788397	-	RPUSD1	RNA pseudouridine synthase domain containing 1 [Source:HGNC Symbol%3BAcc:HGNC:14173]	GO:0000455:enzyme-directed rRNA pseudouridine synthesis;	-	GO:0009982:pseudouridine synthase activity;GO:0003723:RNA binding;	-	-
ENSG00000007384	4914	145	1.99	179	1.82	238	2.2	209	2.44	173	2.32	183	2.37	171	2.02	140	1.86	152	1.81	164	1.97	180	1.94	185	2.23	235	2.31	178	2.05	194	2.2	16	58059	76355	-	RHBDF1	rhomboid 5 homolog 1 [Source:HGNC Symbol%3BAcc:HGNC:20561]	GO:0016477:cell migration;GO:0008283:cell population proliferation;GO:0050709:negative regulation of protein secretion;GO:0015031:protein transport;GO:0006508:proteolysis;GO:0042058:regulation of epidermal growth factor receptor signaling pathway;GO:0061136:regulation of proteasomal protein catabolic process;GO:0050708:regulation of protein secretion;	GO:0005789:endoplasmic reticulum membrane;GO:0000139:Golgi membrane;	GO:0019838:growth factor binding;GO:0004252:serine-type endopeptidase activity;	-	-
ENSG00000007392	6176	844	9.23	1030	8.35	1237	9.08	1055	9.78	897	9.55	933	9.61	936	8.82	912	9.62	980	9.3	932	8.89	1062	9.09	922	8.84	1229	9.61	1101	10.1	1108	9.98	16	188969	229463	-	LUC7L	LUC7 like [Source:HGNC Symbol%3BAcc:HGNC:6723]	GO:0006376:mRNA splice site recognition;	GO:0005685:U1 snRNP;GO:0071004:U2-type prespliceosome;	GO:0042802:identical protein binding;GO:0003729:mRNA binding;	K11447	;ko05202 Transcriptional misregulation in cancer;
ENSG00000007402	6508	1	0.01	11	0.08	15	0.1	6	0.05	7	0.07	8	0.08	8	0.07	4	0.04	5	0.05	8	0.07	4	0.03	7	0.06	16	0.12	9	0.08	8	0.07	3	50362613	50504244	-	CACNA2D2	calcium voltage-gated channel auxiliary subunit alpha2delta 2 [Source:HGNC Symbol%3BAcc:HGNC:1400]	GO:0034765:regulation of monoatomic ion transmembrane transport;GO:0006816:calcium ion transport;GO:0055001:muscle cell development;GO:0007528:neuromuscular junction development;GO:0046622:positive regulation of organ growth;GO:0008016:regulation of heart contraction;GO:0040014:regulation of multicellular organism growth;GO:0060024:rhythmic synaptic transmission;	GO:0005886:plasma membrane;GO:0005891:voltage-gated calcium channel complex;	GO:0046872:metal ion binding;GO:0005245:voltage-gated calcium channel activity;GO:0005246:calcium channel regulator activity;	K04859	;ko04010 MAPK signaling pathway;ko04260 Cardiac muscle contraction;ko04261 Adrenergic signaling in cardiomyocytes;ko04921 Oxytocin signaling pathway;ko05410 Hypertrophic cardiomyopathy;ko05412 Arrhythmogenic right ventricular cardiomyopathy;ko05414 Dilated cardiomyopathy;
ENSG00000007516	6109	8	0.09	5	0.04	8	0.06	5	0.05	8	0.09	3	0.03	7	0.07	6	0.06	11	0.11	2	0.02	3	0.03	6	0.06	3	0.02	8	0.07	10	0.09	16	1333638	1349441	+	BAIAP3	BAI1 associated protein 3 [Source:HGNC Symbol%3BAcc:HGNC:948]	GO:1990502:dense core granule maturation;GO:0006887:exocytosis;GO:0007186:G protein-coupled receptor signaling pathway;GO:0035774:positive regulation of insulin secretion involved in cellular response to glucose stimulus;GO:0001956:positive regulation of neurotransmitter secretion;GO:1905413:regulation of dense core granule exocytosis;GO:0032228:regulation of synaptic transmission, GABAergic;GO:0…	GO:0005829:cytosol;GO:0031902:late endosome membrane;GO:0005886:plasma membrane;GO:0098793:presynapse;GO:0055038:recycling endosome membrane;GO:0032588:trans-Golgi network membrane;	GO:0005509:calcium ion binding;GO:0005543:phospholipid binding;GO:0000149:SNARE binding;GO:0019905:syntaxin binding;	K15621	;ko05202 Transcriptional misregulation in cancer;
ENSG00000007520	1210	303	16.9	457	18.91	573	21.47	393	18.6	341	18.53	370	19.46	361	17.36	311	16.74	373	18.06	456	22.2	491	21.45	362	17.72	451	18	357	16.72	401	18.44	16	1349240	1351878	-	TSR3	TSR3 ribosome maturation factor [Source:HGNC Symbol%3BAcc:HGNC:14175]	GO:0000455:enzyme-directed rRNA pseudouridine synthesis;GO:0030490:maturation of SSU-rRNA;GO:0000154:rRNA modification;	GO:0005829:cytosol;	GO:1904047:S-adenosyl-L-methionine binding;GO:0016740:transferase activity;	K09140	-
ENSG00000007541	7856	162	1.39	248	1.58	231	1.33	165	1.2	140	1.17	169	1.37	190	1.41	141	1.17	223	1.66	169	1.27	166	1.12	149	1.12	237	1.46	193	1.39	175	1.24	16	566995	584109	+	PIGQ	phosphatidylinositol glycan anchor biosynthesis class Q [Source:HGNC Symbol%3BAcc:HGNC:14135]	GO:0005975:carbohydrate metabolic process;GO:0006506:GPI anchor biosynthetic process;	GO:0005789:endoplasmic reticulum membrane;GO:0000506:glycosylphosphatidylinositol-N-acetylglucosaminyltransferase (GPI-GnT) complex;	GO:0017176:phosphatidylinositol N-acetylglucosaminyltransferase activity;	K03860	;ko00563 Glycosylphosphatidylinositol (GPI)-anchor biosynthesis;ko01100 Metabolic pathways;
ENSG00000007545	8596	355	2.79	419	2.44	489	2.58	363	2.42	286	2.19	352	2.61	370	2.5	348	2.64	378	2.58	382	2.62	446	2.74	396	2.73	460	2.58	384	2.53	414	2.68	16	1612337	1677908	+	CRAMP1	cramped chromatin regulator homolog 1 [Source:HGNC Symbol%3BAcc:HGNC:14122]	GO:0007389:pattern specification process;	GO:0005634:nucleus;	GO:0003682:chromatin binding;GO:0003677:DNA binding;	K12581	;ko03018 RNA degradation;
ENSG00000007866	3049	158	3.5	190	3.12	209	3.11	184	3.46	158	3.41	183	3.82	198	3.78	148	3.16	192	3.69	185	3.57	188	3.26	154	2.99	224	3.55	156	2.9	193	3.52	6	35473597	35497079	-	TEAD3	TEA domain transcription factor 3 [Source:HGNC Symbol%3BAcc:HGNC:11716]	GO:0055059:asymmetric neuroblast division;GO:0048568:embryonic organ development;GO:0007565:female pregnancy;GO:0035329:hippo signaling;GO:0045944:positive regulation of transcription by RNA polymerase II;GO:0006357:regulation of transcription by RNA polymerase II;	GO:0000785:chromatin;GO:0005654:nucleoplasm;GO:0005667:transcription regulator complex;	GO:0003700:DNA-binding transcription factor activity;GO:0000981:DNA-binding transcription factor activity, RNA polymerase II-specific;GO:0000978:RNA polymerase II cis-regulatory region sequence-specific DNA binding;GO:0061629:RNA polymerase II-specific DNA-binding transcription factor binding;	K09448	;ko04390 Hippo signaling pathway;ko04391 Hippo signaling pathway - fly;ko04392 Hippo signaling pathway - multiple species;
ENSG00000007908	4586	0	0	1	0.01	0	0	0	0	0	0	0	0	0	0	0	0	0	0	0	0	0	0	0	0	0	0	0	0	0	0	1	169722640	169764705	-	SELE	selectin E [Source:HGNC Symbol%3BAcc:HGNC:10718]	GO:0030029:actin filament-based process;GO:0007202:activation of phospholipase C activity;GO:0019722:calcium-mediated signaling;GO:0007157:heterophilic cell-cell adhesion via plasma membrane cell adhesion molecules;GO:0006954:inflammatory response;GO:0007159:leukocyte cell-cell adhesion;GO:0002523:leukocyte migration involved in inflammatory response;GO:0050901:leukocyte tethering or rolling;GO:1…	GO:0005901:caveola;GO:0005905:clathrin-coated pit;GO:0030863:cortical cytoskeleton;GO:0009897:external side of plasma membrane;GO:0005615:extracellular space;GO:0045121:membrane raft;GO:0048471:perinuclear region of cytoplasm;GO:0005886:plasma membrane;	GO:0046872:metal ion binding;GO:0070492:oligosaccharide binding;GO:0043274:phospholipase binding;GO:0033691:sialic acid binding;GO:0004888:transmembrane signaling receptor activity;GO:0030246:carbohydrate binding;	K06494	;ko04514 Cell adhesion molecules;ko04668 TNF signaling pathway;ko04933 AGE-RAGE signaling pathway in diabetic complications;ko05143 African trypanosomiasis;ko05144 Malaria;ko05417 Lipid and atherosclerosis;ko05418 Fluid shear stress and atherosclerosis;
ENSG00000007923	12182	1659	9.19	2378	9.77	2671	9.94	2142	10.07	1707	9.21	1945	10.16	1889	9.02	1726	9.23	2039	9.81	1945	9.41	2268	9.84	1958	9.52	2345	9.3	1968	9.15	2090	9.55	1	6634168	6701924	-	DNAJC11	DnaJ heat shock protein family (Hsp40) member C11 [Source:HGNC Symbol%3BAcc:HGNC:25570]	GO:0042407:cristae formation;GO:0007007:inner mitochondrial membrane organization;	GO:0140275:MIB complex;GO:0005741:mitochondrial outer membrane;GO:0005739:mitochondrion;GO:0016607:nuclear speck;GO:0005654:nucleoplasm;GO:0001401:SAM complex;GO:0061617:MICOS complex;GO:0005743:mitochondrial inner membrane;	-	K09531	-
ENSG00000007933	3439	1	0.02	1	0.01	3	0.04	2	0.03	1	0.02	2	0.04	1	0.02	3	0.06	1	0.02	1	0.02	3	0.05	1	0.02	0	0	3	0.05	1	0.02	1	171090901	171117819	+	FMO3	flavin containing dimethylaniline monoxygenase 3 [Source:HGNC Symbol%3BAcc:HGNC:3771]	-	GO:0005789:endoplasmic reticulum membrane;GO:0043231:intracellular membrane-bounded organelle;	GO:0050660:flavin adenine dinucleotide binding;GO:0004497:monooxygenase activity;GO:0004499:N,N-dimethylaniline monooxygenase activity;GO:0050661:NADP binding;GO:0034899:trimethylamine monooxygenase activity;	K00485	;ko00430 Taurine and hypotaurine metabolism;ko00982 Drug metabolism - cytochrome P450;ko01100 Metabolic pathways;
ENSG00000007944	3072	250	5.49	315	5.13	347	5.12	288	5.37	220	4.71	283	5.86	320	6.06	276	5.85	359	6.85	253	4.85	296	5.09	252	4.86	347	5.46	285	5.26	326	5.9	6	16129086	16148248	+	MYLIP	myosin regulatory light chain interacting protein [Source:HGNC Symbol%3BAcc:HGNC:21155]	GO:0042632:cholesterol homeostasis;GO:0010989:negative regulation of low-density lipoprotein particle clearance;GO:0010977:negative regulation of neuron projection development;GO:0007399:nervous system development;GO:0045732:positive regulation of protein catabolic process;GO:0031648:protein destabilization;GO:0016567:protein ubiquitination;GO:0032803:regulation of low-density lipoprotein particl…	GO:0005856:cytoskeleton;GO:0005829:cytosol;GO:0005886:plasma membrane;	GO:0008092:cytoskeletal protein binding;GO:0046872:metal ion binding;GO:0061630:ubiquitin protein ligase activity;GO:0004842:ubiquitin-protein transferase activity;	K10637	;ko04979 Cholesterol metabolism;
ENSG00000007952	2543	21	0.56	37	0.73	21	0.37	19	0.43	24	0.62	17	0.43	15	0.34	12	0.31	26	0.6	37	0.86	29	0.6	21	0.49	46	0.87	22	0.49	19	0.42	X	100843324	100874359	-	NOX1	NADPH oxidase 1 [Source:HGNC Symbol%3BAcc:HGNC:7889]	GO:0001525:angiogenesis;GO:0016477:cell migration;GO:0071455:cellular response to hyperoxia;GO:1990451:cellular stress response to acidic pH;GO:0006952:defense response;GO:0030198:extracellular matrix organization;GO:0042743:hydrogen peroxide metabolic process;GO:0006954:inflammatory response;GO:0051454:intracellular pH elevation;GO:0006739:NADP metabolic process;GO:0072592:oxygen metabolic proce…	GO:0030054:cell junction;GO:0042995:cell projection;GO:0005769:early endosome;GO:0043020:NADPH oxidase complex;GO:0005886:plasma membrane;	GO:0046872:metal ion binding;GO:0050661:NADP binding;GO:0031267:small GTPase binding;GO:0016175:superoxide-generating NAD(P)H oxidase activity;GO:0005244:voltage-gated monoatomic ion channel activity;	K08008	;ko04380 Osteoclast differentiation;ko04933 AGE-RAGE signaling pathway in diabetic complications;ko05010 Alzheimer disease;ko05022 Pathways of neurodegeneration - multiple diseases;ko05208 Chemical carcinogenesis - reactive oxygen species;ko05417 Lipid and atherosclerosis;ko05418 Fluid shear stress and atherosclerosis;
ENSG00000007968	5462	329	4.07	413	3.79	467	3.88	294	3.08	274	3.3	291	3.39	419	4.46	307	3.66	385	4.13	284	3.06	378	3.66	326	3.54	513	4.54	419	4.35	478	4.87	1	23506438	23531233	-	E2F2	E2F transcription factor 2 [Source:HGNC Symbol%3BAcc:HGNC:3114]	GO:0007049:cell cycle;GO:0072332:intrinsic apoptotic signaling pathway by p53 class mediator;GO:1990086:lens fiber cell apoptotic process;GO:1903671:negative regulation of sprouting angiogenesis;GO:0045944:positive regulation of transcription by RNA polymerase II;GO:0051726:regulation of cell cycle;GO:0006357:regulation of transcription by RNA polymerase II;GO:0006367:transcription initiation at …	GO:0000785:chromatin;GO:0005654:nucleoplasm;GO:0090575:RNA polymerase II transcription regulator complex;	GO:0000987:cis-regulatory region sequence-specific DNA binding;GO:0003677:DNA binding;GO:0001228:DNA-binding transcription activator activity, RNA polymerase II-specific;GO:0003700:DNA-binding transcription factor activity;GO:0000981:DNA-binding transcription factor activity, RNA polymerase II-specific;GO:0046983:protein dimerization activity;GO:0000978:RNA polymerase II cis-regulatory region seq…	K09389	;ko01522 Endocrine resistance;ko04110 Cell cycle;ko04218 Cellular senescence;ko04934 Cushing syndrome;ko05160 Hepatitis C;ko05161 Hepatitis B;ko05163 Human cytomegalovirus infection;ko05166 Human T-cell leukemia virus 1 infection;ko05167 Kaposi sarcoma-associated herpesvirus infection;ko05169 Epstein-Barr virus infection;ko05200 Pathways in cancer;ko05206 MicroRNAs in cancer;ko05212 Pancreatic ca…
ENSG00000008018	2219	1309	39.82	1841	41.53	2061	42.11	1568	40.47	1341	39.74	1355	38.85	1589	41.67	1362	39.97	1528	40.35	1498	39.77	1644	39.16	1507	40.23	1829	39.81	1560	39.84	1532	38.42	6	170535120	170553307	-	PSMB1	proteasome 20S subunit beta 1 [Source:HGNC Symbol%3BAcc:HGNC:9537]	GO:0010499:proteasomal ubiquitin-independent protein catabolic process;GO:0043161:proteasome-mediated ubiquitin-dependent protein catabolic process;	GO:0005737:cytoplasm;GO:0005829:cytosol;GO:0070062:extracellular exosome;GO:0005576:extracellular region;GO:1904813:ficolin-1-rich granule lumen;GO:0005654:nucleoplasm;GO:0005634:nucleus;GO:0000502:proteasome complex;GO:0005839:proteasome core complex;GO:0019774:proteasome core complex, beta-subunit complex;GO:0034774:secretory granule lumen;	GO:0004175:endopeptidase activity;GO:0004298:threonine-type endopeptidase activity;	K02732	;ko03050 Proteasome;ko05010 Alzheimer disease;ko05012 Parkinson disease;ko05014 Amyotrophic lateral sclerosis;ko05016 Huntington disease;ko05017 Spinocerebellar ataxia;ko05020 Prion disease;ko05022 Pathways of neurodegeneration - multiple diseases;
ENSG00000008056	3733	1	0.02	2	0.03	2	0.02	1	0.02	1	0.02	1	0.02	0	0	1	0.02	0	0	2	0.03	2	0.03	1	0.02	2	0.03	1	0.02	1	0.01	X	47571901	47619857	-	SYN1	synapsin I [Source:HGNC Symbol%3BAcc:HGNC:11494]	GO:0007268:chemical synaptic transmission;GO:0048666:neuron development;GO:0007269:neurotransmitter secretion;GO:0046928:regulation of neurotransmitter secretion;GO:0098693:regulation of synaptic vesicle cycle;GO:2000300:regulation of synaptic vesicle exocytosis;GO:0050808:synapse organization;GO:0097091:synaptic vesicle clustering;GO:0048172:regulation of short-term neuronal synaptic plasticity;…	GO:0098993:obsolete anchored component of synaptic vesicle membrane;GO:0030424:axon;GO:0005856:cytoskeleton;GO:0005829:cytosol;GO:0030425:dendrite;GO:0098850:extrinsic component of synaptic vesicle membrane;GO:0005794:Golgi apparatus;GO:0014069:postsynaptic density;GO:0048786:presynaptic active zone;GO:0098685:Schaffer collateral - CA1 synapse;GO:0008021:synaptic vesicle;GO:0030672:synaptic vesic…	GO:0003779:actin binding;GO:0005524:ATP binding;GO:0048306:calcium-dependent protein binding;GO:0042802:identical protein binding;GO:0019901:protein kinase binding;GO:0005215:transporter activity;	-	-
ENSG00000008083	6244	461	4.98	610	4.89	676	4.91	531	4.87	510	5.37	513	5.23	613	5.71	499	5.2	569	5.34	550	5.19	601	5.09	567	5.38	614	4.75	528	4.79	560	4.99	6	15246069	15522042	+	JARID2	jumonji and AT-rich interaction domain containing 2 [Source:HGNC Symbol%3BAcc:HGNC:6196]	GO:1990830:cellular response to leukemia inhibitory factor;GO:0007417:central nervous system development;GO:0006338:chromatin remodeling;GO:0034721:histone H3-K4 demethylation, trimethyl-H3-K4-specific;GO:0001889:liver development;GO:0060044:negative regulation of cardiac muscle cell proliferation;GO:0010614:negative regulation of cardiac muscle hypertrophy;GO:0031061:negative regulation of histo…	GO:0035098:ESC/E(Z) complex;GO:0035097:histone methyltransferase complex;GO:0005739:mitochondrion;GO:0005654:nucleoplasm;GO:0005634:nucleus;	GO:0003682:chromatin binding;GO:0003677:DNA binding;GO:0032452:histone demethylase activity;GO:0008134:transcription factor binding;	K11478	;ko03083 Polycomb repressive complex;ko04550 Signaling pathways regulating pluripotency of stem cells;
ENSG00000008086	19056	508	1.8	634	1.67	725	1.73	570	1.71	504	1.74	518	1.73	580	1.77	547	1.87	602	1.85	561	1.73	650	1.8	511	1.59	634	1.61	570	1.7	545	1.59	X	18425583	18653629	+	CDKL5	cyclin dependent kinase like 5 [Source:HGNC Symbol%3BAcc:HGNC:11411]	GO:0001764:neuron migration;GO:0045773:positive regulation of axon extension;GO:0050775:positive regulation of dendrite morphogenesis;GO:0060999:positive regulation of dendritic spine development;GO:0043547:positive regulation of GTPase activity;GO:0046777:protein autophosphorylation;GO:0006468:protein phosphorylation;GO:1902017:regulation of cilium assembly;GO:0050773:regulation of dendrite deve…	GO:0005813:centrosome;GO:0036064:ciliary basal body;GO:0097542:ciliary tip;GO:0032839:dendrite cytoplasm;GO:0044294:dendritic growth cone;GO:0098978:glutamatergic synapse;GO:0005654:nucleoplasm;GO:0005634:nucleus;GO:0048471:perinuclear region of cytoplasm;GO:0099092:postsynaptic density, intracellular component;GO:0032587:ruffle membrane;	GO:0005524:ATP binding;GO:0004693:cyclin-dependent protein serine/threonine kinase activity;GO:0016301:kinase activity;GO:0004672:protein kinase activity;GO:0106310:protein serine kinase activity;GO:0004674:protein serine/threonine kinase activity;GO:0031267:small GTPase binding;GO:0046872:metal ion binding;GO:0003964:RNA-directed DNA polymerase activity;GO:0009036:type II site-specific deoxyribo…	K08824	-
ENSG00000008118	3328	0	0	2	0.03	0	0	0	0	1	0.02	1	0.02	1	0.02	0	0	0	0	1	0.02	1	0.02	1	0.02	0	0	0	0	2	0.03	1	209583714	209613939	+	CAMK1G	calcium/calmodulin dependent protein kinase IG [Source:HGNC Symbol%3BAcc:HGNC:14585]	GO:0018105:peptidyl-serine phosphorylation;	GO:0005954:calcium- and calmodulin-dependent protein kinase complex;GO:0000139:Golgi membrane;GO:0043005:neuron projection;GO:0005886:plasma membrane;	GO:0005524:ATP binding;GO:0005516:calmodulin binding;GO:0004683:calmodulin-dependent protein kinase activity;GO:0106310:protein serine kinase activity;	K08794	;ko04020 Calcium signaling pathway;ko04921 Oxytocin signaling pathway;ko04925 Aldosterone synthesis and secretion;ko05214 Glioma;
ENSG00000008128	5085	301	4	370	3.64	403	3.59	375	4.22	305	3.94	335	4.19	303	3.47	306	3.92	314	3.62	304	3.52	328	3.41	349	4.07	414	3.93	322	3.59	359	3.93	1	1702379	1724357	-	CDK11A	cyclin dependent kinase 11A [Source:HGNC Symbol%3BAcc:HGNC:1730]	GO:0001824:blastocyst development;GO:0007049:cell cycle;GO:2001234:negative regulation of apoptotic signaling pathway;GO:0006468:protein phosphorylation;GO:0007346:regulation of mitotic cell cycle;GO:0007088:regulation of mitotic nuclear division;GO:0050684:regulation of mRNA processing;GO:0006915:apoptotic process;GO:0000278:mitotic cell cycle;GO:0001558:regulation of cell growth;GO:0006355:regu…	GO:0005654:nucleoplasm;GO:0005634:nucleus;GO:0005737:cytoplasm;	GO:0005524:ATP binding;GO:0004693:cyclin-dependent protein serine/threonine kinase activity;GO:0106310:protein serine kinase activity;GO:0004674:protein serine/threonine kinase activity;GO:0004672:protein kinase activity;GO:0003723:RNA binding;	K08818	-
ENSG00000008130	5570	1207	14.63	1540	13.84	1685	13.72	1420	14.6	1195	14.11	1220	13.94	1303	13.61	1184	13.84	1301	13.69	1215	12.85	1430	13.57	1237	13.15	1722	14.93	1483	15.09	1466	14.64	1	1751232	1780457	-	NADK	NAD kinase [Source:HGNC Symbol%3BAcc:HGNC:29831]	GO:0046034:ATP metabolic process;GO:0019674:NAD metabolic process;GO:0006741:NADP biosynthetic process;GO:0016310:phosphorylation;GO:0035774:positive regulation of insulin secretion involved in cellular response to glucose stimulus;	GO:0005829:cytosol;	GO:0005524:ATP binding;GO:0046872:metal ion binding;GO:0003951:NAD+ kinase activity;	K00858	;ko00760 Nicotinate and nicotinamide metabolism;ko01100 Metabolic pathways;ko01240 Biosynthesis of cofactors;
ENSG00000008196	6155	0	0	0	0	0	0	0	0	0	0	0	0	0	0	0	0	0	0	0	0	0	0	0	0	0	0	0	0	0	0	6	50818723	50847619	+	TFAP2B	transcription factor AP-2 beta [Source:HGNC Symbol%3BAcc:HGNC:11743]	GO:0048856:anatomical structure development;GO:0035909:aorta morphogenesis;GO:0055074:calcium ion homeostasis;GO:0097275:intracellular ammonium homeostasis;GO:0097276:obsolete cellular creatinine homeostasis;GO:0097277:obsolete cellular urea homeostasis;GO:0072044:collecting duct development;GO:0072017:distal tubule development;GO:0097070:ductus arteriosus closure;GO:0045444:fat cell differentiat…	GO:0005634:nucleus;	GO:0003682:chromatin binding;GO:0000987:cis-regulatory region sequence-specific DNA binding;GO:0001228:DNA-binding transcription activator activity, RNA polymerase II-specific;GO:0003700:DNA-binding transcription factor activity;GO:0000981:DNA-binding transcription factor activity, RNA polymerase II-specific;GO:0046982:protein heterodimerization activity;GO:0042803:protein homodimerization activi…	K09176	-
ENSG00000008197	2203	0	0	0	0	0	0	0	0	0	0	0	0	0	0	0	0	0	0	0	0	0	0	0	0	0	0	0	0	0	0	6	50713526	50773033	+	TFAP2D	transcription factor AP-2 delta [Source:HGNC Symbol%3BAcc:HGNC:15581]	GO:0048856:anatomical structure development;GO:0061379:inferior colliculus development;GO:0043524:negative regulation of neuron apoptotic process;GO:0045944:positive regulation of transcription by RNA polymerase II;GO:0042127:regulation of cell population proliferation;GO:0006357:regulation of transcription by RNA polymerase II;	GO:0000785:chromatin;GO:0005634:nucleus;GO:0005667:transcription regulator complex;	GO:0000981:DNA-binding transcription factor activity, RNA polymerase II-specific;GO:0000977:RNA polymerase II transcription regulatory region sequence-specific DNA binding;	K09178	-
ENSG00000008226	8338	5	0.04	2	0.01	5	0.03	2	0.01	1	0.01	3	0.02	7	0.05	0	0	3	0.02	2	0.01	1	0.01	1	0.01	3	0.02	1	0.01	2	0.01	3	38039205	38124025	+	DLEC1	DLEC1 cilia and flagella associated protein [Source:HGNC Symbol%3BAcc:HGNC:2899]	GO:0030154:cell differentiation;GO:0002357:defense response to tumor cell;GO:0008285:negative regulation of cell population proliferation;GO:0007283:spermatogenesis;	GO:0005737:cytoplasm;GO:0005829:cytosol;	GO:0043014:alpha-tubulin binding;GO:0048487:beta-tubulin binding;	K15696	-
ENSG00000008256	5808	865	10.05	1110	9.57	1357	10.59	1161	11.45	919	10.41	1095	12	1275	12.77	1058	11.86	1135	11.45	1064	10.79	1280	11.65	1144	11.67	1314	10.93	1184	11.55	1001	9.59	7	6161776	6272644	-	CYTH3	cytohesin 3 [Source:HGNC Symbol%3BAcc:HGNC:9504]	GO:0090162:establishment of epithelial cell polarity;GO:0048193:Golgi vesicle transport;GO:0045785:positive regulation of cell adhesion;GO:0032012:regulation of ARF protein signal transduction;	GO:0005912:adherens junction;GO:0005923:bicellular tight junction;GO:0005737:cytoplasm;GO:0005829:cytosol;GO:0031234:extrinsic component of cytoplasmic side of plasma membrane;GO:0005654:nucleoplasm;GO:0005886:plasma membrane;GO:0001726:ruffle;GO:0000139:Golgi membrane;	GO:0005085:guanyl-nucleotide exchange factor activity;GO:0005547:phosphatidylinositol-3,4,5-trisphosphate binding;	K18441	;ko04072 Phospholipase D signaling pathway;ko04144 Endocytosis;ko05130 Pathogenic Escherichia coli infection;ko05131 Shigellosis;ko05132 Salmonella infection;
ENSG00000008277	13668	495	2.44	622	2.28	647	2.15	462	1.94	405	1.95	412	1.92	497	2.12	450	2.14	474	2.03	491	2.12	506	1.96	428	1.85	681	2.41	572	2.37	599	2.44	7	87934143	88202889	+	ADAM22	ADAM metallopeptidase domain 22 [Source:HGNC Symbol%3BAcc:HGNC:201]	GO:0008344:adult locomotory behavior;GO:0007155:cell adhesion;GO:0007417:central nervous system development;GO:0022011:myelination in peripheral nervous system;GO:0007162:negative regulation of cell adhesion;GO:0099645:neurotransmitter receptor localization to postsynaptic specialization membrane;	GO:0030424:axon;GO:0098978:glutamatergic synapse;GO:0099061:obsolete integral component of postsynaptic density membrane;GO:0005886:plasma membrane;	GO:0005178:integrin binding;GO:0004222:metalloendopeptidase activity;	K16068	-
ENSG00000008282	2783	2586	62.73	3514	63.21	3697	60.23	2610	53.72	2707	63.97	2779	63.53	2911	60.86	2653	62.08	2673	56.28	3272	69.26	2965	56.31	2855	60.76	3784	65.67	3008	61.25	2991	59.8	7	106090505	106112576	-	SYPL1	synaptophysin like 1 [Source:HGNC Symbol%3BAcc:HGNC:11507]	GO:0007268:chemical synaptic transmission;	GO:0070062:extracellular exosome;GO:0030285:obsolete integral component of synaptic vesicle membrane;GO:0042470:melanosome;GO:0030141:secretory granule;GO:0030672:synaptic vesicle membrane;	GO:0017075:syntaxin-1 binding;	K04264	;ko04020 Calcium signaling pathway;ko04080 Neuroactive ligand-receptor interaction;ko04611 Platelet activation;
ENSG00000008283	5296	423	5.39	569	5.38	623	5.33	531	5.74	450	5.59	486	5.84	497	5.46	453	5.57	542	6	488	5.43	575	5.74	480	5.37	598	5.45	525	5.62	496	5.21	17	63432304	63446354	-	CYB561	cytochrome b561 [Source:HGNC Symbol%3BAcc:HGNC:2571]	GO:0140576:ascorbate homeostasis;GO:0006879:intracellular iron ion homeostasis;GO:0022900:electron transport chain;	GO:0042584:chromaffin granule membrane;GO:0005765:lysosomal membrane;	GO:0046872:metal ion binding;GO:0016491:oxidoreductase activity;GO:0140575:transmembrane monodehydroascorbate reductase activity;	K08360	-
ENSG00000008294	11951	2808	15.86	3807	15.95	4244	16.1	3391	16.25	3049	16.78	2986	15.9	3396	16.53	3158	17.21	3348	16.41	3400	16.76	3660	16.19	3175	15.74	3857	15.59	3186	15.11	3302	15.37	17	50962174	51120868	-	SPAG9	sperm associated antigen 9 [Source:HGNC Symbol%3BAcc:HGNC:14524]	GO:0007257:obsolete activation of JUN kinase activity;GO:0032418:lysosome localization;GO:1903860:negative regulation of dendrite extension;GO:0045665:negative regulation of neuron differentiation;GO:0001933:negative regulation of protein phosphorylation;GO:0030335:positive regulation of cell migration;GO:0045666:positive regulation of neuron differentiation;GO:0042147:retrograde transport, endos…	GO:0001669:acrosomal vesicle;GO:0034451:centriolar satellite;GO:0005737:cytoplasm;GO:0005829:cytosol;GO:0070062:extracellular exosome;GO:0005765:lysosomal membrane;GO:0048471:perinuclear region of cytoplasm;	GO:0042802:identical protein binding;GO:0008432:JUN kinase binding;GO:0019894:kinesin binding;GO:0005078:MAP-kinase scaffold activity;GO:0030159:signaling receptor complex adaptor activity;	K04436;K14835;K16467	-
ENSG00000008300	13850	915	4.46	1248	4.51	1503	4.92	1223	5.06	1025	4.87	1172	5.38	1063	4.47	926	4.35	1064	4.5	987	4.2	1244	4.75	1063	4.55	1511	5.27	1313	5.37	1277	5.13	3	48636463	48662886	-	CELSR3	cadherin EGF LAG seven-pass G-type receptor 3 [Source:HGNC Symbol%3BAcc:HGNC:3230]	GO:0098609:cell-cell adhesion;GO:0007186:G protein-coupled receptor signaling pathway;GO:0007156:homophilic cell adhesion via plasma membrane adhesion molecules;GO:0060071:Wnt signaling pathway, planar cell polarity pathway;	GO:0005886:plasma membrane;	GO:0005509:calcium ion binding;GO:0004930:G protein-coupled receptor activity;	K04602	-
ENSG00000008311	10816	632	3.94	805	3.73	912	3.82	734	3.89	658	4	740	4.35	696	3.74	606	3.65	681	3.69	721	3.93	658	3.22	696	3.81	798	3.56	719	3.77	713	3.67	7	122064583	122144308	-	AASS	aminoadipate-semialdehyde synthase [Source:HGNC Symbol%3BAcc:HGNC:17366]	GO:0033512:L-lysine catabolic process to acetyl-CoA via saccharopine;GO:0019878:lysine biosynthetic process via aminoadipic acid;GO:0006554:lysine catabolic process;GO:0031061:negative regulation of histone methylation;GO:0000122:negative regulation of transcription by RNA polymerase II;	GO:0005737:cytoplasm;GO:0005829:cytosol;GO:0043231:intracellular membrane-bounded organelle;GO:0005759:mitochondrial matrix;GO:0005739:mitochondrion;GO:0005634:nucleus;	GO:0042393:histone binding;GO:0047131:saccharopine dehydrogenase (NAD+, L-glutamate-forming) activity;GO:0004754:saccharopine dehydrogenase (NAD+, L-lysine-forming) activity;GO:0047130:saccharopine dehydrogenase (NADP+, L-lysine-forming) activity;GO:0004753:saccharopine dehydrogenase activity;GO:0003714:transcription corepressor activity;	K14157	;ko00310 Lysine degradation;ko01100 Metabolic pathways;
ENSG00000008323	4316	3	0.05	6	0.07	11	0.12	5	0.07	3	0.05	6	0.09	9	0.12	5	0.08	3	0.04	6	0.08	5	0.06	3	0.04	2	0.02	3	0.04	7	0.09	12	6310436	6328506	+	PLEKHG6	pleckstrin homology and RhoGEF domain containing G6 [Source:HGNC Symbol%3BAcc:HGNC:25562]	GO:0051056:regulation of small GTPase mediated signal transduction;	GO:0030054:cell junction;GO:0005813:centrosome;GO:0032154:cleavage furrow;GO:0005829:cytosol;GO:0005902:microvillus;GO:0000922:spindle pole;	GO:0005085:guanyl-nucleotide exchange factor activity;	K10408	;ko04814 Motor proteins;ko05014 Amyotrophic lateral sclerosis;ko05016 Huntington disease;ko05022 Pathways of neurodegeneration - multiple diseases;
ENSG00000008324	3118	340	7.36	430	6.9	512	7.45	421	7.73	360	7.59	328	6.69	393	7.33	362	7.56	357	6.71	434	8.2	433	7.34	386	7.33	481	7.45	374	6.8	390	6.96	3	42581840	42596934	+	SS18L2	SS18 like 2 [Source:HGNC Symbol%3BAcc:HGNC:15593]	GO:0050775:positive regulation of dendrite morphogenesis;GO:0045944:positive regulation of transcription by RNA polymerase II;	GO:0005634:nucleus;	GO:0003713:transcription coactivator activity;	K01557;K14443	;ko00350 Tyrosine metabolism;ko01100 Metabolic pathways;;ko03018 RNA degradation;
ENSG00000008382	2049	23	0.76	45	1.1	57	1.26	26	0.73	29	0.93	39	1.21	42	1.19	35	1.11	36	1.03	61	1.75	47	1.21	33	0.95	42	0.99	36	1	53	1.44	19	4343527	4360086	+	MPND	MPN domain containing [Source:HGNC Symbol%3BAcc:HGNC:25934]	GO:0006338:chromatin remodeling;GO:0045944:positive regulation of transcription by RNA polymerase II;	-	GO:0042393:histone binding;GO:0070122:obsolete isopeptidase activity;GO:0046872:metal ion binding;GO:0008237:metallopeptidase activity;GO:0004843:cysteine-type deubiquitinase activity;GO:0003713:transcription coactivator activity;	-	-
ENSG00000008394	7441	3966	35.98	5369	36.12	6000	36.56	4948	38.09	4392	38.82	4692	40.12	4317	33.76	3738	32.71	4202	33.09	5011	39.67	5125	36.4	4743	37.75	5004	32.48	4256	32.41	4447	33.25	12	16347142	16609259	+	MGST1	microsomal glutathione S-transferase 1 [Source:HGNC Symbol%3BAcc:HGNC:7061]	GO:0071449:cellular response to lipid hydroperoxide;GO:0034635:glutathione transport;GO:0033327:Leydig cell differentiation;GO:0032496:response to lipopolysaccharide;GO:0010243:response to organonitrogen compound;	GO:0045177:apical part of cell;GO:0035577:azurophil granule membrane;GO:0005783:endoplasmic reticulum;GO:0005789:endoplasmic reticulum membrane;GO:0005741:mitochondrial outer membrane;GO:0005739:mitochondrion;GO:0005634:nucleus;GO:0005778:peroxisomal membrane;GO:0005886:plasma membrane;	GO:0043295:glutathione binding;GO:0004602:glutathione peroxidase activity;GO:0004364:glutathione transferase activity;GO:0042802:identical protein binding;	K00799;K08857	-
ENSG00000008405	4782	647	9.13	872	9.13	1037	9.83	814	9.75	701	9.64	801	10.66	822	10	730	9.94	868	10.64	883	10.88	855	9.45	777	9.62	833	8.41	649	7.69	701	8.16	12	106991364	107093549	-	CRY1	cryptochrome circadian regulator 1 [Source:HGNC Symbol%3BAcc:HGNC:2384]	GO:0009785:blue light signaling pathway;GO:0032922:circadian regulation of gene expression;GO:0007623:circadian rhythm;GO:0043153:entrainment of circadian clock by photoperiod;GO:0006094:gluconeogenesis;GO:0042593:glucose homeostasis;GO:0019915:lipid storage;GO:0042754:negative regulation of circadian rhythm;GO:0045744:negative regulation of G protein-coupled receptor signaling pathway;GO:2000323…	GO:0005737:cytoplasm;GO:0005739:mitochondrion;GO:0005634:nucleus;	GO:0009882:blue light photoreceptor activity;GO:0003677:DNA binding;GO:0003690:double-stranded DNA binding;GO:0070888:E-box binding;GO:0071949:FAD binding;GO:0042826:histone deacetylase binding;GO:0016922:nuclear receptor binding;GO:0019902:phosphatase binding;GO:0019901:protein kinase binding;GO:0000166:nucleotide binding;GO:0009881:photoreceptor activity;	K02295	;ko04710 Circadian rhythm;
ENSG00000008438	708	0	0	2	0.14	1	0.06	0	0	2	0.19	0	0	2	0.16	0	0	0	0	0	0	1	0.07	0	0	1	0.07	2	0.16	0	0	19	46019153	46023053	-	PGLYRP1	peptidoglycan recognition protein 1 [Source:HGNC Symbol%3BAcc:HGNC:8904]	GO:0061844:antimicrobial humoral immune response mediated by antimicrobial peptide;GO:0051701:biological process involved in interaction with host;GO:0050830:defense response to Gram-positive bacterium;GO:0016045:detection of bacterium;GO:0045087:innate immune response;GO:0031640:killing of cells of another organism;GO:0050728:negative regulation of inflammatory response;GO:0032689:negative regul…	GO:0070062:extracellular exosome;GO:0005576:extracellular region;GO:0097013:phagocytic vesicle lumen;GO:0035580:specific granule lumen;GO:1904724:tertiary granule lumen;	GO:0008745:N-acetylmuramoyl-L-alanine amidase activity;GO:0042834:peptidoglycan binding;GO:0016019:peptidoglycan immune receptor activity;GO:0008270:zinc ion binding;	K01446	;ko04624 Toll and Imd signaling pathway;
ENSG00000008441	6486	320	3.33	467	3.6	556	3.89	438	3.87	397	4.03	445	4.37	453	4.06	380	3.82	423	3.82	427	3.88	564	4.6	422	3.85	628	4.68	544	4.75	501	4.3	19	12995475	13098796	+	NFIX	nuclear factor I X [Source:HGNC Symbol%3BAcc:HGNC:7788]	GO:0006260:DNA replication;GO:0000122:negative regulation of transcription by RNA polymerase II;GO:0045944:positive regulation of transcription by RNA polymerase II;GO:0006357:regulation of transcription by RNA polymerase II;GO:0006366:transcription by RNA polymerase II;	GO:0000785:chromatin;GO:0005634:nucleus;	GO:0003700:DNA-binding transcription factor activity;GO:0000981:DNA-binding transcription factor activity, RNA polymerase II-specific;GO:0000978:RNA polymerase II cis-regulatory region sequence-specific DNA binding;GO:1990837:sequence-specific double-stranded DNA binding;GO:0003677:DNA binding;	K09171	-
ENSG00000008513	8852	2262	17.25	2933	16.59	3590	18.39	3596	23.27	2830	21.02	3107	22.33	3062	20.13	2870	21.11	2951	19.53	3216	21.4	3672	21.93	3079	20.6	3286	17.93	2550	16.32	2537	15.95	8	133454848	133571940	-	ST3GAL1	ST3 beta-galactoside alpha-2%2C3-sialyltransferase 1 [Source:HGNC Symbol%3BAcc:HGNC:10862]	GO:0010706:ganglioside biosynthetic process via lactosylceramide;GO:0018146:keratan sulfate biosynthetic process;GO:0002319:memory B cell differentiation;GO:0006054:N-acetylneuraminate metabolic process;GO:1905403:negative regulation of activated CD8-positive, alpha-beta T cell apoptotic process;GO:0016266:O-glycan processing;GO:0006487:protein N-linked glycosylation;GO:0006468:protein phosphoryl…	GO:0070062:extracellular exosome;GO:1990675:Golgi medial cisterna membrane;GO:0000139:Golgi membrane;GO:1990676:Golgi trans cisterna membrane;GO:0016020:membrane;GO:0032588:trans-Golgi network membrane;	GO:0003836:beta-galactoside (CMP) alpha-2,3-sialyltransferase activity;GO:0047288:beta-D-galactosyl-(1->3)-N-acetyl-beta-D-galactosaminide alpha-2,3- sialyltransferase;GO:0008373:sialyltransferase activity;	K00780	;ko00512 Mucin type O-glycan biosynthesis;ko00533 Glycosaminoglycan biosynthesis - keratan sulfate;ko00603 Glycosphingolipid biosynthesis - globo and isoglobo series;ko00604 Glycosphingolipid biosynthesis - ganglio series;ko01100 Metabolic pathways;
ENSG00000008516	4745	8	0.11	3	0.03	5	0.05	1	0.01	2	0.03	4	0.05	5	0.06	5	0.07	7	0.09	7	0.09	4	0.04	3	0.04	3	0.03	4	0.05	3	0.04	16	3046062	3060726	+	MMP25	matrix metallopeptidase 25 [Source:HGNC Symbol%3BAcc:HGNC:14246]	GO:0030574:collagen catabolic process;GO:0030198:extracellular matrix organization;GO:0060022:hard palate development;GO:0006954:inflammatory response;GO:0006508:proteolysis;	GO:0031225:obsolete anchored component of membrane;GO:0031012:extracellular matrix;GO:0005576:extracellular region;GO:0016020:membrane;GO:0005886:plasma membrane;GO:0035579:specific granule membrane;	GO:0004222:metalloendopeptidase activity;GO:0008270:zinc ion binding;	K08003	;ko04928 Parathyroid hormone synthesis, secretion and action;
ENSG00000008517	3209	130	2.73	141	2.2	208	2.94	134	2.39	140	2.87	159	3.15	154	2.79	133	2.7	161	2.94	134	2.46	168	2.77	139	2.57	140	2.11	118	2.08	114	1.98	16	3065297	3082192	+	IL32	interleukin 32 [Source:HGNC Symbol%3BAcc:HGNC:16830]	GO:0007155:cell adhesion;GO:0006952:defense response;GO:0006955:immune response;GO:1903901:negative regulation of viral life cycle;GO:0010628:positive regulation of gene expression;GO:1905636:positive regulation of RNA polymerase II regulatory region sequence-specific DNA binding;GO:0034346:positive regulation of type III interferon production;	GO:0005829:cytosol;GO:0005615:extracellular space;GO:0016020:membrane;	GO:0005125:cytokine activity;	K04135	;ko04020 Calcium signaling pathway;ko04022 cGMP-PKG signaling pathway;ko04080 Neuroactive ligand-receptor interaction;ko04152 AMPK signaling pathway;ko04261 Adrenergic signaling in cardiomyocytes;ko04270 Vascular smooth muscle contraction;ko04970 Salivary secretion;
ENSG00000008710	18534	299	1.09	439	1.19	481	1.18	298	0.92	285	1.01	340	1.17	406	1.27	317	1.11	362	1.14	364	1.16	416	1.19	343	1.1	480	1.25	373	1.14	475	1.43	16	2088708	2135898	-	PKD1	polycystin 1%2C transient receptor potential channel interacting [Source:HGNC Symbol%3BAcc:HGNC:9008]	GO:0009653:anatomical structure morphogenesis;GO:0048754:branching morphogenesis of an epithelial tube;GO:0070588:calcium ion transmembrane transport;GO:0007161:calcium-independent cell-matrix adhesion;GO:0001502:cartilage condensation;GO:0051216:cartilage development;GO:0198738:cell-cell signaling by wnt;GO:0007160:cell-matrix adhesion;GO:0042994:cytoplasmic sequestering of transcription factor;…	GO:0016323:basolateral plasma membrane;GO:0034704:calcium channel complex;GO:0034703:cation channel complex;GO:0009986:cell surface;GO:0060170:ciliary membrane;GO:0005929:cilium;GO:0005737:cytoplasm;GO:0005783:endoplasmic reticulum;GO:0070062:extracellular exosome;GO:0005794:Golgi apparatus;GO:0000139:Golgi membrane;GO:0030660:Golgi-associated vesicle membrane;GO:0016328:lateral plasma membrane;G…	GO:0005262:calcium channel activity;GO:0030246:carbohydrate binding;GO:0019904:protein domain specific binding;GO:0019901:protein kinase binding;GO:0044325:transmembrane transporter binding;GO:0042813:Wnt receptor activity;	K04985	-
ENSG00000008735	5793	11	0.13	22	0.19	38	0.3	36	0.36	26	0.3	32	0.35	24	0.24	10	0.11	14	0.14	25	0.25	21	0.19	17	0.17	25	0.21	19	0.19	21	0.2	22	50600793	50613981	+	MAPK8IP2	mitogen-activated protein kinase 8 interacting protein 2 [Source:HGNC Symbol%3BAcc:HGNC:6883]	GO:0001662:behavioral fear response;GO:0048813:dendrite morphogenesis;GO:0060079:excitatory postsynaptic potential;GO:0007254:JNK cascade;GO:0000165:MAPK cascade;GO:0007617:mating behavior;GO:2001234:negative regulation of apoptotic signaling pathway;GO:0046958:nonassociative learning;GO:0032874:positive regulation of stress-activated MAPK cascade;GO:2000311:regulation of AMPA receptor activity;G…	GO:0005737:cytoplasm;GO:0043025:neuronal cell body;GO:0014069:postsynaptic density;GO:0032991:protein-containing complex;	GO:0001540:amyloid-beta binding;GO:0019894:kinesin binding;GO:0005078:MAP-kinase scaffold activity;GO:0030295:protein kinase activator activity;GO:0019901:protein kinase binding;GO:0044877:protein-containing complex binding;GO:0005198:structural molecule activity;	K04435	;ko04010 MAPK signaling pathway;
ENSG00000008838	6962	915	8.87	1193	8.58	1309	8.53	1058	8.7	928	8.77	959	8.76	966	8.07	905	8.47	975	8.21	1000	8.46	1215	9.22	993	8.45	1199	8.32	1049	8.54	1097	8.77	17	40019097	40061215	-	MED24	mediator complex subunit 24 [Source:HGNC Symbol%3BAcc:HGNC:22963]	GO:0060261:positive regulation of transcription initiation by RNA polymerase II;GO:0045893:positive regulation of DNA-templated transcription;	GO:0016592:mediator complex;GO:0005654:nucleoplasm;GO:0005634:nucleus;GO:0000151:ubiquitin ligase complex;	GO:0004402:histone acetyltransferase activity;GO:0030374:nuclear receptor coactivator activity;GO:0044877:protein-containing complex binding;GO:0046966:nuclear thyroid hormone receptor binding;GO:0003713:transcription coactivator activity;GO:0003712:transcription coregulator activity;GO:0061630:ubiquitin protein ligase activity;GO:0042809:nuclear vitamin D receptor binding;	K15167	;ko04919 Thyroid hormone signaling pathway;
ENSG00000008853	7408	586	5.34	783	5.29	861	5.27	711	5.5	636	5.65	669	5.75	730	5.73	624	5.49	666	5.27	712	5.66	731	5.22	596	4.77	943	6.15	791	6.05	744	5.59	8	22987417	23020509	+	RHOBTB2	Rho related BTB domain containing 2 [Source:HGNC Symbol%3BAcc:HGNC:18756]	GO:0007015:actin filament organization;GO:0030865:cortical cytoskeleton organization;GO:0043652:engulfment of apoptotic cell;GO:0007163:establishment or maintenance of cell polarity;GO:0032956:regulation of actin cytoskeleton organization;GO:0008360:regulation of cell shape;GO:0007264:small GTPase mediated signal transduction;	GO:0005938:cell cortex;GO:0042995:cell projection;GO:0031410:cytoplasmic vesicle;GO:0005856:cytoskeleton;GO:0010008:endosome membrane;GO:0043231:intracellular membrane-bounded organelle;GO:0005886:plasma membrane;	GO:0005525:GTP binding;GO:0003924:GTPase activity;GO:0019901:protein kinase binding;	K07868	;ko04120 Ubiquitin mediated proteolysis;
ENSG00000008869	8238	582	4.77	708	4.3	809	4.45	661	4.6	571	4.56	538	4.16	533	3.76	522	4.13	589	4.19	616	4.4	650	4.17	604	4.34	776	4.55	636	4.37	623	4.21	2	36968383	37084372	-	HEATR5B	HEAT repeat containing 5B [Source:HGNC Symbol%3BAcc:HGNC:29273]	GO:0006897:endocytosis;GO:0008104:protein localization;GO:0015031:protein transport;GO:0042147:retrograde transport, endosome to Golgi;	GO:0030136:clathrin-coated vesicle;GO:0005829:cytosol;GO:0030139:endocytic vesicle;GO:0016020:membrane;GO:0048471:perinuclear region of cytoplasm;	-	K12870	;ko03040 Spliceosome;
ENSG00000008952	7928	4202	35.78	5831	36.82	6141	35.12	4991	36.06	4448	36.9	4813	38.63	4610	33.83	4269	35.07	4655	34.4	5555	41.28	5522	36.81	5109	38.17	5702	34.74	4510	32.24	4734	33.23	3	169966635	169998373	+	SEC62	SEC62 homolog%2C preprotein translocation factor [Source:HGNC Symbol%3BAcc:HGNC:11846]	GO:0006613:cotranslational protein targeting to membrane;GO:0006620:post-translational protein targeting to endoplasmic reticulum membrane;GO:0031204:post-translational protein targeting to membrane, translocation;	GO:0005783:endoplasmic reticulum;GO:0030176:obsolete integral component of endoplasmic reticulum membrane;GO:0016020:membrane;GO:0005791:rough endoplasmic reticulum;	GO:0038023:signaling receptor activity;	K12275	;ko03060 Protein export;ko04141 Protein processing in endoplasmic reticulum;
ENSG00000008988	6765	5692	56.8	7418	54.89	8410	56.37	6451	54.62	5357	52.07	5470	51.45	6397	55.02	5392	51.91	6247	54.11	6067	52.83	6785	53.01	6122	53.6	7961	56.84	6549	54.86	7088	58.3	8	56067254	56074510	-	RPS20	ribosomal protein S20 [Source:HGNC Symbol%3BAcc:HGNC:10405]	GO:0002181:cytoplasmic translation;GO:1901798:positive regulation of signal transduction by p53 class mediator;GO:0006412:translation;	GO:0005829:cytosol;GO:0022626:cytosolic ribosome;GO:0022627:cytosolic small ribosomal subunit;GO:0070062:extracellular exosome;GO:0016020:membrane;GO:0005654:nucleoplasm;GO:0015935:small ribosomal subunit;GO:0045202:synapse;GO:0098556:cytoplasmic side of rough endoplasmic reticulum membrane;GO:0005737:cytoplasm;	GO:0097371:MDM2/MDM4 family protein binding;GO:0003723:RNA binding;GO:0003735:structural constituent of ribosome;GO:1990948:ubiquitin ligase inhibitor activity;	K02969	;ko03010 Ribosome;ko05171 Coronavirus disease - COVID-19;
ENSG00000009307	9830	11291	77.54	15589	79.38	16969	78.27	12338	71.89	10495	70.21	10627	68.78	12917	76.46	11717	77.62	12974	77.34	12617	75.61	14424	77.56	12446	74.99	15826	77.76	13828	79.71	13287	75.21	1	114716913	114758676	-	CSDE1	cold shock domain containing E1 [Source:HGNC Symbol%3BAcc:HGNC:29905]	GO:0075522:IRES-dependent viral translational initiation;GO:0008584:male gonad development;GO:0070966:nuclear-transcribed mRNA catabolic process, no-go decay;GO:0006446:regulation of translational initiation;GO:0034063:stress granule assembly;	GO:0070937:CRD-mediated mRNA stability complex;GO:0010494:cytoplasmic stress granule;GO:0005829:cytosol;GO:0005794:Golgi apparatus;GO:0000932:P-body;GO:0005886:plasma membrane;GO:0005743:mitochondrial inner membrane;	GO:0003723:RNA binding;GO:0035613:RNA stem-loop binding;	K11447	;ko05202 Transcriptional misregulation in cancer;
ENSG00000009335	9215	2206	16.16	2895	15.73	3216	15.82	2500	15.54	2087	14.89	2267	15.65	2430	15.34	2213	15.64	2423	15.41	2536	16.21	2884	16.54	2436	15.66	2745	14.39	2357	14.49	2442	14.75	7	157138916	157269370	+	UBE3C	ubiquitin protein ligase E3C [Source:HGNC Symbol%3BAcc:HGNC:16803]	GO:0000209:protein polyubiquitination;GO:0006511:ubiquitin-dependent protein catabolic process;	GO:0005634:nucleus;GO:0000502:proteasome complex;	GO:0061630:ubiquitin protein ligase activity;	K10589	;ko04120 Ubiquitin mediated proteolysis;
ENSG00000009413	12425	852	4.63	1186	4.78	1295	4.73	1086	5.01	960	5.08	1067	5.46	1161	5.44	984	5.16	1099	5.18	1057	5.01	1172	4.99	1091	5.2	1474	5.73	1194	5.45	1178	5.28	6	111299028	111483715	-	REV3L	REV3 like%2C DNA directed polymerase zeta catalytic subunit [Source:HGNC Symbol%3BAcc:HGNC:9968]	GO:0006261:DNA-templated DNA replication;GO:0000724:double-strand break repair via homologous recombination;GO:0042276:error-prone translesion synthesis;GO:0090305:nucleic acid phosphodiester bond hydrolysis;	GO:0005730:nucleolus;GO:0005654:nucleoplasm;GO:0005634:nucleus;GO:0016035:zeta DNA polymerase complex;	GO:0051539:4 iron, 4 sulfur cluster binding;GO:0003677:DNA binding;GO:0003887:DNA-directed DNA polymerase activity;GO:0046872:metal ion binding;GO:0000166:nucleotide binding;	K02350	;ko01524 Platinum drug resistance;ko03460 Fanconi anemia pathway;
ENSG00000009694	13547	8	0.04	8	0.03	4	0.01	3	0.01	10	0.05	5	0.02	5	0.02	7	0.03	10	0.04	7	0.03	6	0.02	4	0.02	8	0.03	10	0.04	9	0.04	X	124375903	125204312	-	TENM1	teneurin transmembrane protein 1 [Source:HGNC Symbol%3BAcc:HGNC:8117]	GO:0007157:heterophilic cell-cell adhesion via plasma membrane cell adhesion molecules;GO:0006955:immune response;GO:0008285:negative regulation of cell population proliferation;GO:0007399:nervous system development;GO:0048666:neuron development;GO:0007218:neuropeptide signaling pathway;GO:0030838:positive regulation of actin filament polymerization;GO:0051491:positive regulation of filopodium as…	GO:0005737:cytoplasm;GO:0005856:cytoskeleton;GO:0005783:endoplasmic reticulum;GO:0005576:extracellular region;GO:0005794:Golgi apparatus;GO:0043005:neuron projection;GO:0016363:nuclear matrix;GO:0016607:nuclear speck;GO:0005634:nucleus;GO:0048471:perinuclear region of cytoplasm;GO:0005886:plasma membrane;	GO:0050839:cell adhesion molecule binding;GO:0008201:heparin binding;GO:0046982:protein heterodimerization activity;GO:0042803:protein homodimerization activity;GO:0042802:identical protein binding;	-	-
ENSG00000009709	6473	0	0	0	0	0	0	0	0	0	0	0	0	0	0	0	0	0	0	0	0	0	0	0	0	0	0	0	0	0	0	1	18630846	18748866	+	PAX7	paired box 7 [Source:HGNC Symbol%3BAcc:HGNC:8621]	GO:0048856:anatomical structure development;GO:0009653:anatomical structure morphogenesis;GO:0007517:muscle organ development;GO:0043066:negative regulation of apoptotic process;GO:0006357:regulation of transcription by RNA polymerase II;	GO:0000785:chromatin;GO:0005634:nucleus;	GO:0003700:DNA-binding transcription factor activity;GO:0000981:DNA-binding transcription factor activity, RNA polymerase II-specific;GO:0000978:RNA polymerase II cis-regulatory region sequence-specific DNA binding;GO:1990837:sequence-specific double-stranded DNA binding;	K09381	;ko05202 Transcriptional misregulation in cancer;
ENSG00000009724	5113	72	0.95	119	1.17	127	1.13	82	0.92	69	0.89	78	0.97	109	1.24	114	1.45	106	1.21	85	0.98	92	0.95	91	1.05	140	1.32	105	1.16	110	1.2	1	11022009	11047239	-	MASP2	MBL associated serine protease 2 [Source:HGNC Symbol%3BAcc:HGNC:6902]	GO:0006958:complement activation, classical pathway;GO:0001867:complement activation, lectin pathway;	GO:0070062:extracellular exosome;GO:0005576:extracellular region;GO:0005615:extracellular space;	GO:0005509:calcium ion binding;GO:0048306:calcium-dependent protein binding;GO:0001855:complement component C4b binding;GO:0042802:identical protein binding;GO:0008233:peptidase activity;GO:0004252:serine-type endopeptidase activity;	K03993	;ko04610 Complement and coagulation cascades;ko05150 Staphylococcus aureus infection;ko05171 Coronavirus disease - COVID-19;
ENSG00000009765	10362	0	0	0	0	0	0	0	0	0	0	0	0	0	0	0	0	1	0.01	1	0.01	0	0	0	0	0	0	0	0	0	0	6	150368892	150405969	+	IYD	iodotyrosine deiodinase [Source:HGNC Symbol%3BAcc:HGNC:21071]	GO:0042403:thyroid hormone metabolic process;GO:0006570:tyrosine metabolic process;	GO:0030659:cytoplasmic vesicle membrane;GO:0005654:nucleoplasm;GO:0005886:plasma membrane;	GO:0010181:FMN binding;GO:0004447:iodide peroxidase activity;GO:0140616:iodotyrosine deiodinase activity;GO:0016491:oxidoreductase activity;	K17231	;ko04918 Thyroid hormone synthesis;
ENSG00000009780	4046	110	1.84	149	1.84	186	2.08	176	2.49	130	2.11	130	2.04	132	1.9	144	2.32	128	1.85	149	2.17	141	1.84	123	1.8	186	2.22	191	2.68	160	2.2	1	27725961	27763116	+	FAM76A	family with sequence similarity 76 member A [Source:HGNC Symbol%3BAcc:HGNC:28530]	-	GO:0005654:nucleoplasm;	-	K08834;K14993;K02355	-
ENSG00000009790	7750	0	0	1	0.01	2	0.01	0	0	1	0.01	2	0.02	1	0.01	1	0.01	1	0.01	2	0.02	1	0.01	0	0	0	0	0	0	0	0	1	209756032	209782320	+	TRAF3IP3	TRAF3 interacting protein 3 [Source:HGNC Symbol%3BAcc:HGNC:30766]	-	GO:0000139:Golgi membrane;GO:0005765:lysosomal membrane;GO:0005741:mitochondrial outer membrane;GO:0005886:plasma membrane;	-	-	-
ENSG00000009830	13203	417	2.13	534	2.02	648	2.23	507	2.2	480	2.39	460	2.22	493	2.17	416	2.05	487	2.16	474	2.11	544	2.18	498	2.23	538	1.97	520	2.23	547	2.31	14	77274956	77320883	-	POMT2	protein O-mannosyltransferase 2 [Source:HGNC Symbol%3BAcc:HGNC:19743]	GO:0071712:ER-associated misfolded protein catabolic process;GO:1904100:positive regulation of protein O-linked glycosylation;GO:0035269:protein O-linked mannosylation;	GO:0005829:cytosol;GO:0005789:endoplasmic reticulum membrane;GO:0005730:nucleolus;GO:0005654:nucleoplasm;	GO:0004169:dolichyl-phosphate-mannose-protein mannosyltransferase activity;GO:0000030:mannosyltransferase activity;GO:0046872:metal ion binding;	K00728	;ko00514 Other types of O-glycan biosynthesis;ko00515 Mannose type O-glycan biosynthesis;ko01100 Metabolic pathways;
ENSG00000009844	7258	1436	13.36	1998	13.78	2109	13.18	1724	13.6	1531	13.87	1580	13.85	1675	13.43	1507	13.52	1612	13.01	1870	15.18	1958	14.26	1783	14.55	2005	13.34	1678	13.1	1683	12.9	6	142147162	142224685	+	VTA1	vesicle trafficking 1 [Source:HGNC Symbol%3BAcc:HGNC:20954]	GO:1904903:ESCRT III complex disassembly;GO:0032511:late endosome to vacuole transport via multivesicular body sorting pathway;GO:0016236:macroautophagy;GO:0036258:multivesicular body assembly;GO:0071985:multivesicular body sorting pathway;GO:0015031:protein transport;GO:0046755:viral budding;	GO:0005829:cytosol;GO:0010008:endosome membrane;GO:0070062:extracellular exosome;GO:0043231:intracellular membrane-bounded organelle;GO:0005771:multivesicular body;GO:0005654:nucleoplasm;	GO:0008022:obsolete protein C-terminus binding;	K12199	;ko04144 Endocytosis;
ENSG00000009950	4815	10	0.14	13	0.14	16	0.15	25	0.3	12	0.16	7	0.09	18	0.22	9	0.12	4	0.05	15	0.18	8	0.09	11	0.14	13	0.13	17	0.2	8	0.09	7	73593194	73624543	-	MLXIPL	MLX interacting protein like [Source:HGNC Symbol%3BAcc:HGNC:12744]	GO:0009653:anatomical structure morphogenesis;GO:0097009:energy homeostasis;GO:0055089:fatty acid homeostasis;GO:0042593:glucose homeostasis;GO:0010255:glucose mediated signaling pathway;GO:0090324:negative regulation of oxidative phosphorylation;GO:0033137:negative regulation of peptidyl-serine phosphorylation;GO:0045892:negative regulation of DNA-templated transcription;GO:0008284:positive regu…	GO:0000785:chromatin;GO:0005737:cytoplasm;GO:0005829:cytosol;GO:0005654:nucleoplasm;GO:0005634:nucleus;GO:0005667:transcription regulator complex;	GO:0035538:carbohydrate response element binding;GO:0003677:DNA binding;GO:0003700:DNA-binding transcription factor activity;GO:0000981:DNA-binding transcription factor activity, RNA polymerase II-specific;GO:0001227:DNA-binding transcription repressor activity, RNA polymerase II-specific;GO:0046982:protein heterodimerization activity;GO:0000978:RNA polymerase II cis-regulatory region sequence-sp…	K09113	;ko04931 Insulin resistance;ko04932 Non-alcoholic fatty liver disease;
ENSG00000009954	7060	5954	56.93	7614	53.99	8588	55.15	7218	58.56	5972	55.63	5982	53.91	6549	53.97	6024	55.57	6943	57.62	6307	52.62	7262	54.37	6576	55.17	8373	57.28	7241	58.12	7188	56.65	7	73440406	73522293	-	BAZ1B	bromodomain adjacent to zinc finger domain 1B [Source:HGNC Symbol%3BAcc:HGNC:961]	GO:0006974:DNA damage response;GO:0006338:chromatin remodeling;GO:0016572:obsolete histone phosphorylation;GO:0006357:regulation of transcription by RNA polymerase II;	GO:0000793:condensed chromosome;GO:0016604:nuclear body;GO:0005654:nucleoplasm;GO:0005721:pericentric heterochromatin;	GO:0005524:ATP binding;GO:0042393:histone binding;GO:0035173:histone kinase activity;GO:0004715:non-membrane spanning protein tyrosine kinase activity;GO:0004713:protein tyrosine kinase activity;GO:0004714:transmembrane receptor protein tyrosine kinase activity;GO:0008270:zinc ion binding;	K11658	;ko03082 ATP-dependent chromatin remodeling;
ENSG00000010017	3618	1499	27.97	2021	27.96	2065	25.88	1837	29.08	1497	27.21	1574	27.68	1803	29	1554	27.97	1680	27.21	1665	27.11	1866	27.26	1634	26.75	2367	31.6	1958	30.67	1926	29.62	6	13621498	13711835	-	RANBP9	RAN binding protein 9 [Source:HGNC Symbol%3BAcc:HGNC:13727]	GO:0007166:cell surface receptor signaling pathway;GO:0007010:cytoskeleton organization;GO:0007020:microtubule nucleation;GO:0070373:negative regulation of ERK1 and ERK2 cascade;GO:1902993:positive regulation of amyloid precursor protein catabolic process;GO:0065003:protein-containing complex assembly;	GO:0005737:cytoplasm;GO:0005829:cytosol;GO:0005875:microtubule associated complex;GO:0016604:nuclear body;GO:0005654:nucleoplasm;GO:0005634:nucleus;GO:0005886:plasma membrane;GO:0000151:ubiquitin ligase complex;	GO:0019899:enzyme binding;GO:0031267:small GTPase binding;	-	-
ENSG00000010030	2374	2	0.06	5	0.11	2	0.04	6	0.14	4	0.11	1	0.03	0	0	1	0.03	2	0.05	3	0.07	2	0.04	2	0.05	0	0	1	0.02	1	0.02	6	36354091	36387800	-	ETV7	ETS variant transcription factor 7 [Source:HGNC Symbol%3BAcc:HGNC:18160]	GO:0009887:animal organ morphogenesis;GO:0030154:cell differentiation;GO:0000122:negative regulation of transcription by RNA polymerase II;GO:0006357:regulation of transcription by RNA polymerase II;GO:0006366:transcription by RNA polymerase II;	GO:0000785:chromatin;GO:0005654:nucleoplasm;GO:0005634:nucleus;	GO:0000981:DNA-binding transcription factor activity, RNA polymerase II-specific;GO:0001227:DNA-binding transcription repressor activity, RNA polymerase II-specific;GO:0000977:RNA polymerase II transcription regulatory region sequence-specific DNA binding;GO:1990837:sequence-specific double-stranded DNA binding;	K03211	;ko04013 MAPK signaling pathway - fly;ko04320 Dorso-ventral axis formation;ko05202 Transcriptional misregulation in cancer;
ENSG00000010072	5906	512	5.85	637	5.4	697	5.35	544	5.28	501	5.58	491	5.29	601	5.92	489	5.39	561	5.57	630	6.28	598	5.35	591	5.93	636	5.2	542	5.2	579	5.45	1	231337104	231355023	+	SPRTN	SprT-like N-terminal domain [Source:HGNC Symbol%3BAcc:HGNC:25356]	GO:0006974:DNA damage response;GO:0031398:positive regulation of protein ubiquitination;GO:0016540:protein autoprocessing;GO:0106300:protein-DNA covalent cross-linking repair;GO:0006508:proteolysis;GO:0009411:response to UV;GO:0019985:translesion synthesis;	GO:0000785:chromatin;GO:0016607:nuclear speck;GO:0005654:nucleoplasm;GO:0005634:nucleus;	GO:0003690:double-stranded DNA binding;GO:0070530:K63-linked polyubiquitin modification-dependent protein binding;GO:0046872:metal ion binding;GO:0004222:metalloendopeptidase activity;GO:0031593:polyubiquitin modification-dependent protein binding;GO:0003697:single-stranded DNA binding;GO:0043130:ubiquitin binding;	-	-
ENSG00000010165	3831	916	16.14	1273	16.63	1312	15.53	1112	16.63	859	14.75	1014	16.84	977	14.84	953	16.2	1069	16.35	1054	16.21	1143	15.77	1063	16.43	1140	14.37	1014	15	1083	15.73	1	171781660	171814023	+	METTL13	methyltransferase 13%2C eEF1A lysine and N-terminal methyltransferase [Source:HGNC Symbol%3BAcc:HGNC:24248]	GO:0032259:methylation;GO:1902807:negative regulation of cell cycle G1/S phase transition;GO:0000122:negative regulation of transcription by RNA polymerase II;	GO:0005737:cytoplasm;GO:0005739:mitochondrion;GO:0005634:nucleus;	GO:0008168:methyltransferase activity;	K01528	;ko04072 Phospholipase D signaling pathway;ko04144 Endocytosis;ko04721 Synaptic vesicle cycle;ko04961 Endocrine and other factor-regulated calcium reabsorption;ko05100 Bacterial invasion of epithelial cells;
ENSG00000010219	7050	119	1.14	154	1.09	150	0.96	119	0.97	122	1.14	99	0.89	113	0.93	106	0.98	136	1.13	104	0.87	114	0.85	108	0.91	157	1.08	124	1	140	1.1	12	4562208	4615302	+	DYRK4	dual specificity tyrosine phosphorylation regulated kinase 4 [Source:HGNC Symbol%3BAcc:HGNC:3095]	GO:0018105:peptidyl-serine phosphorylation;GO:0018107:peptidyl-threonine phosphorylation;	GO:0005737:cytoplasm;GO:0005856:cytoskeleton;GO:0043231:intracellular membrane-bounded organelle;GO:0005634:nucleus;	GO:0005524:ATP binding;GO:0046872:metal ion binding;GO:0106310:protein serine kinase activity;GO:0004674:protein serine/threonine kinase activity;GO:0004712:protein serine/threonine/tyrosine kinase activity;GO:0004714:transmembrane receptor protein tyrosine kinase activity;	K18669	-
ENSG00000010244	15818	4623	19.73	6317	19.99	6750	19.35	5133	18.59	4733	19.68	4877	19.62	5740	21.11	5204	21.42	5832	21.6	5465	20.35	6162	20.59	5362	20.08	6724	20.53	5506	19.72	5540	19.49	17	32350132	32381885	+	ZNF207	zinc finger protein 207 [Source:HGNC Symbol%3BAcc:HGNC:12998]	GO:0008608:attachment of spindle microtubules to kinetochore;GO:0051301:cell division;GO:0001578:microtubule bundle formation;GO:0046785:microtubule polymerization;GO:0000070:mitotic sister chromatid segregation;GO:0090307:mitotic spindle assembly;GO:0007094:mitotic spindle assembly checkpoint signaling;GO:0050821:protein stabilization;GO:0051983:regulation of chromosome segregation;	GO:0005737:cytoplasm;GO:0000776:kinetochore;GO:0005874:microtubule;GO:0005730:nucleolus;GO:0005654:nucleoplasm;GO:0005634:nucleus;GO:0005819:spindle;GO:1990047:spindle matrix;	GO:0008201:heparin binding;GO:0046872:metal ion binding;GO:0008017:microtubule binding;	K17985;K04613;K07994	-;ko04657 IL-17 signaling pathway;ko04926 Relaxin signaling pathway;ko04928 Parathyroid hormone synthesis, secretion and action;
ENSG00000010256	3204	1701	35.84	2216	34.62	2630	37.22	2082	37.22	1780	36.53	1807	35.88	2000	36.32	1748	35.53	2028	37.09	1940	35.67	2337	38.55	1936	35.79	2399	36.17	1945	34.4	2001	34.75	3	48599002	48610976	-	UQCRC1	ubiquinol-cytochrome c reductase core protein 1 [Source:HGNC Symbol%3BAcc:HGNC:12585]	GO:0009060:aerobic respiration;GO:0006122:mitochondrial electron transport, ubiquinol to cytochrome c;GO:0006119:oxidative phosphorylation;GO:0014823:response to activity;GO:0043279:response to alkaloid;	GO:0005743:mitochondrial inner membrane;GO:0005746:mitochondrial respirasome;GO:0005750:mitochondrial respiratory chain complex III;GO:0005739:mitochondrion;	GO:0046872:metal ion binding;GO:0044877:protein-containing complex binding;GO:0008121:ubiquinol-cytochrome-c reductase activity;GO:0031625:ubiquitin protein ligase binding;	K00414	;ko00190 Oxidative phosphorylation;ko01100 Metabolic pathways;ko04260 Cardiac muscle contraction;ko04714 Thermogenesis;ko04932 Non-alcoholic fatty liver disease;ko05010 Alzheimer disease;ko05012 Parkinson disease;ko05014 Amyotrophic lateral sclerosis;ko05016 Huntington disease;ko05020 Prion disease;ko05022 Pathways of neurodegeneration - multiple diseases;ko05208 Chemical carcinogenesis - reactiv…
ENSG00000010270	4324	822	12.83	1103	12.77	1193	12.51	924	12.24	800	12.17	819	12.05	962	12.95	807	12.15	894	12.11	1073	14.62	1032	12.61	885	12.12	989	11.05	819	10.73	856	11.02	7	38178245	38230670	+	STARD3NL	STARD3 N-terminal like [Source:HGNC Symbol%3BAcc:HGNC:19169]	GO:0099044:vesicle tethering to endoplasmic reticulum;	GO:0005829:cytosol;GO:0140284:endoplasmic reticulum-endosome membrane contact site;GO:0005768:endosome;GO:0043231:intracellular membrane-bounded organelle;GO:0031902:late endosome membrane;GO:0005765:lysosomal membrane;GO:0016020:membrane;GO:0044232:organelle membrane contact site;	GO:0015485:cholesterol binding;GO:0042803:protein homodimerization activity;	K12606	;ko03018 RNA degradation;
ENSG00000010278	5829	1884	21.82	2325	19.97	2708	21.06	2264	22.25	1971	22.24	2174	23.73	2162	21.58	1986	22.19	2127	21.38	2177	22	2297	20.83	2042	20.75	2686	22.26	2198	21.37	2200	21	12	6199715	6238271	+	CD9	CD9 molecule [Source:HGNC Symbol%3BAcc:HGNC:1709]	GO:0007420:brain development;GO:0007155:cell adhesion;GO:0071404:cellular response to low-density lipoprotein particle stimulus;GO:0007342:fusion of sperm to egg plasma membrane involved in single fertilization;GO:0008347:glial cell migration;GO:0014905:myoblast fusion involved in skeletal muscle regeneration;GO:0008285:negative regulation of cell population proliferation;GO:0051271:obsolete nega…	GO:0016324:apical plasma membrane;GO:0030669:clathrin-coated endocytic vesicle membrane;GO:0030666:endocytic vesicle membrane;GO:0009897:external side of plasma membrane;GO:0070062:extracellular exosome;GO:0005615:extracellular space;GO:1903561:extracellular vesicle;GO:0005925:focal adhesion;GO:0016020:membrane;GO:0005886:plasma membrane;GO:0031092:platelet alpha granule membrane;GO:0032991:prote…	GO:0005178:integrin binding;	K06460	;ko04640 Hematopoietic cell lineage;
ENSG00000010282	2888	0	0	0	0	0	0	0	0	0	0	0	0	0	0	1	0.02	0	0	0	0	0	0	0	0	0	0	0	0	0	0	3	42692663	42702824	-	HHATL	hedgehog acyltransferase like [Source:HGNC Symbol%3BAcc:HGNC:13242]	GO:0060262:negative regulation of N-terminal protein palmitoylation;	GO:0005783:endoplasmic reticulum;GO:0005789:endoplasmic reticulum membrane;GO:0048471:perinuclear region of cytoplasm;	GO:0016746:acyltransferase activity;	-	-
ENSG00000010292	6470	3818	39.84	5200	40.23	5351	37.5	3398	30.08	3165	32.17	3154	31.02	4403	39.6	3969	39.95	4516	40.9	3517	32.02	4323	35.32	3793	34.72	5384	40.19	4853	42.5	4979	42.82	12	6493356	6531955	+	NCAPD2	non-SMC condensin I complex subunit D2 [Source:HGNC Symbol%3BAcc:HGNC:24305]	GO:0051301:cell division;GO:0010032:meiotic chromosome condensation;GO:0007076:mitotic chromosome condensation;	GO:0000793:condensed chromosome;GO:0000779:condensed chromosome, centromeric region;GO:0000796:condensin complex;GO:0005737:cytoplasm;GO:0005829:cytosol;GO:0016020:membrane;GO:0005654:nucleoplasm;GO:0005634:nucleus;	GO:0003682:chromatin binding;GO:0042393:histone binding;	K06677;K17432	-
ENSG00000010295	4945	2	0.03	3	0.03	7	0.06	3	0.03	7	0.09	2	0.03	6	0.07	2	0.03	2	0.02	5	0.06	6	0.06	4	0.05	7	0.07	2	0.02	9	0.1	12	6538961	6556073	-	IFFO1	intermediate filament family orphan 1 [Source:HGNC Symbol%3BAcc:HGNC:24970]	GO:1990683:DNA double-strand break attachment to nuclear envelope;GO:0006303:double-strand break repair via nonhomologous end joining;GO:1990166:protein localization to site of double-strand break;	GO:0005882:intermediate filament;GO:0005637:nuclear inner membrane;GO:0016363:nuclear matrix;GO:0005654:nucleoplasm;GO:0035861:site of double-strand break;	-	K06115	-
ENSG00000010310	5069	1	0.01	4	0.04	6	0.05	6	0.07	6	0.08	5	0.06	8	0.09	2	0.03	6	0.07	3	0.03	5	0.05	5	0.06	6	0.06	3	0.03	2	0.02	19	45668221	45683722	+	GIPR	gastric inhibitory polypeptide receptor [Source:HGNC Symbol%3BAcc:HGNC:4271]	GO:0007190:activation of adenylate cyclase activity;GO:0007189:adenylate cyclase-activating G protein-coupled receptor signaling pathway;GO:0007188:adenylate cyclase-modulating G protein-coupled receptor signaling pathway;GO:0007166:cell surface receptor signaling pathway;GO:0002029:desensitization of G protein-coupled receptor signaling pathway;GO:0031018:endocrine pancreas development;GO:003819…	GO:0005886:plasma membrane;	GO:0008528:G protein-coupled peptide receptor activity;GO:0016519:gastric inhibitory peptide receptor activity;GO:0120022:glucagon family peptide binding;GO:0017046:peptide hormone binding;GO:0004888:transmembrane signaling receptor activity;	K04580	;ko04024 cAMP signaling pathway;ko04080 Neuroactive ligand-receptor interaction;
ENSG00000010318	3364	46	0.92	46	0.68	59	0.8	26	0.44	39	0.76	34	0.64	55	0.95	49	0.95	46	0.8	34	0.6	48	0.75	27	0.48	51	0.73	70	1.18	60	0.99	3	52410660	52423641	+	PHF7	PHD finger protein 7 [Source:HGNC Symbol%3BAcc:HGNC:18458]	-	GO:0005829:cytosol;GO:0005794:Golgi apparatus;GO:0016607:nuclear speck;GO:0005654:nucleoplasm;GO:0005634:nucleus;GO:0005886:plasma membrane;	GO:0046872:metal ion binding;	K09537	-
ENSG00000010319	5047	17	0.23	30	0.3	41	0.37	40	0.45	20	0.26	32	0.4	24	0.28	30	0.39	30	0.35	23	0.27	25	0.26	29	0.34	22	0.21	20	0.22	21	0.23	3	52433035	52445103	-	SEMA3G	semaphorin 3G [Source:HGNC Symbol%3BAcc:HGNC:30400]	GO:0007411:axon guidance;GO:0050919:negative chemotaxis;GO:0030517:negative regulation of axon extension;GO:0048843:negative regulation of axon extension involved in axon guidance;GO:0001755:neural crest cell migration;GO:0030335:positive regulation of cell migration;GO:0071526:semaphorin-plexin signaling pathway;	GO:0070062:extracellular exosome;GO:0005615:extracellular space;	GO:0045499:chemorepellent activity;GO:0030215:semaphorin receptor binding;GO:0005102:signaling receptor binding;	K06840	;ko04360 Axon guidance;
ENSG00000010322	9062	665	4.95	865	4.78	1043	5.22	905	5.72	765	5.55	816	5.73	867	5.57	725	5.21	795	5.14	774	5.03	868	5.06	787	5.14	1131	6.03	962	6.02	963	5.91	3	52455118	52493068	+	NISCH	nischarin [Source:HGNC Symbol%3BAcc:HGNC:18006]	GO:0030036:actin cytoskeleton organization;GO:0006915:apoptotic process;GO:0006006:glucose metabolic process;GO:0030336:negative regulation of cell migration;GO:0048243:norepinephrine secretion;GO:0016601:Rac protein signal transduction;GO:0008217:regulation of blood pressure;GO:0032228:regulation of synaptic transmission, GABAergic;	GO:0005737:cytoplasm;GO:0005829:cytosol;GO:0005769:early endosome;GO:0045171:intercellular bridge;GO:0043231:intracellular membrane-bounded organelle;GO:0016020:membrane;GO:0015630:microtubule cytoskeleton;GO:0005654:nucleoplasm;GO:0005886:plasma membrane;GO:0055037:recycling endosome;	GO:0042802:identical protein binding;GO:0005178:integrin binding;GO:0035091:phosphatidylinositol binding;GO:0019901:protein kinase binding;	K18047;K12022	-
ENSG00000010327	10588	0	0	1	0	0	0	0	0	0	0	1	0.01	1	0.01	0	0	2	0.01	0	0	0	0	0	0	1	0	0	0	1	0.01	3	52495338	52524495	+	STAB1	stabilin 1 [Source:HGNC Symbol%3BAcc:HGNC:18628]	GO:0007155:cell adhesion;GO:0007267:cell-cell signaling;GO:0042742:defense response to bacterium;GO:0006954:inflammatory response;GO:0016525:negative regulation of angiogenesis;GO:0006898:receptor-mediated endocytosis;	GO:0030666:endocytic vesicle membrane;GO:0005886:plasma membrane;	GO:0005509:calcium ion binding;GO:0005540:hyaluronic acid binding;GO:0030169:low-density lipoprotein particle binding;GO:0005041:low-density lipoprotein particle receptor activity;GO:0015035:protein-disulfide reductase activity;GO:0005044:scavenger receptor activity;	K19020	;ko04148 Efferocytosis;
ENSG00000010361	2953	58	1.33	66	1.12	85	1.31	70	1.36	63	1.4	74	1.59	59	1.16	76	1.68	64	1.27	82	1.64	94	1.68	91	1.83	110	1.8	95	1.82	102	1.92	19	49806866	49817376	-	FUZ	fuzzy planar cell polarity protein [Source:HGNC Symbol%3BAcc:HGNC:26219]	GO:0060271:cilium assembly;GO:0010172:embryonic body morphogenesis;GO:0048704:embryonic skeletal system morphogenesis;GO:0001736:establishment of planar polarity;GO:0001942:hair follicle development;GO:0090090:negative regulation of canonical Wnt signaling pathway;GO:0030336:negative regulation of cell migration;GO:0008285:negative regulation of cell population proliferation;GO:2000314:negative r…	GO:0042995:cell projection;GO:0005737:cytoplasm;GO:0005856:cytoskeleton;GO:0070062:extracellular exosome;	-	K03849	;ko00510 N-Glycan biosynthesis;ko01100 Metabolic pathways;
ENSG00000010379	4243	0	0	4	0.05	2	0.02	1	0.01	0	0	1	0.01	1	0.01	4	0.06	2	0.03	1	0.01	0	0	0	0	2	0.02	0	0	0	0	12	220621	262873	-	SLC6A13	solute carrier family 6 member 13 [Source:HGNC Symbol%3BAcc:HGNC:11046]	GO:0089718:amino acid import across plasma membrane;GO:0015881:creatine transmembrane transport;GO:0051939:gamma-aminobutyric acid import;GO:0051936:gamma-aminobutyric acid reuptake;GO:0015718:monocarboxylic acid transport;GO:0071705:nitrogen compound transport;GO:0010940:obsolete positive regulation of necrotic cell death;GO:0035725:sodium ion transmembrane transport;GO:0015734:taurine transport…	GO:0016323:basolateral plasma membrane;GO:0070062:extracellular exosome;GO:0043005:neuron projection;GO:0005886:plasma membrane;GO:0098793:presynapse;	GO:0015171:amino acid transmembrane transporter activity;GO:0005308:creatine transmembrane transporter activity;GO:0015185:gamma-aminobutyric acid transmembrane transporter activity;GO:0005332:gamma-aminobutyric acid:sodium:chloride symporter activity;GO:0008028:monocarboxylic acid transmembrane transporter activity;GO:0005368:taurine transmembrane transporter activity;	K05039	-
ENSG00000010404	9294	90	0.65	144	0.78	151	0.74	126	0.78	86	0.61	124	0.85	93	0.58	95	0.67	103	0.65	118	0.75	129	0.73	133	0.85	122	0.63	104	0.63	115	0.69	X	149476988	149521096	-	IDS	iduronate 2-sulfatase [Source:HGNC Symbol%3BAcc:HGNC:5389]	GO:0006027:glycosaminoglycan catabolic process;	GO:0043202:lysosomal lumen;GO:0005764:lysosome;	GO:0005509:calcium ion binding;GO:0004423:iduronate-2-sulfatase activity;GO:0008484:sulfuric ester hydrolase activity;	K01136	;ko00531 Glycosaminoglycan degradation;ko01100 Metabolic pathways;ko04142 Lysosome;
ENSG00000010438	1425	2	0.09	0	0	0	0	0	0	1	0.05	0	0	3	0.12	0	0	1	0.04	0	0	0	0	1	0.04	2	0.07	2	0.08	0	0	9	33750679	33799231	+	PRSS3	serine protease 3 [Source:HGNC Symbol%3BAcc:HGNC:9486]	GO:0019730:antimicrobial humoral response;GO:0007586:digestion;GO:0043542:endothelial cell migration;GO:0006508:proteolysis;GO:0031638:zymogen activation;	GO:0005576:extracellular region;GO:0005615:extracellular space;GO:1904724:tertiary granule lumen;	GO:0005509:calcium ion binding;GO:0004252:serine-type endopeptidase activity;GO:0008236:serine-type peptidase activity;	K01312	;ko04080 Neuroactive ligand-receptor interaction;ko04972 Pancreatic secretion;ko04974 Protein digestion and absorption;ko05164 Influenza A;
ENSG00000010539	7498	385	3.47	466	3.11	622	3.76	472	3.61	421	3.69	437	3.71	474	3.68	392	3.4	441	3.45	432	3.39	489	3.45	410	3.24	529	3.41	431	3.26	449	3.33	16	3222325	3236221	-	ZNF200	zinc finger protein 200 [Source:HGNC Symbol%3BAcc:HGNC:12993]	-	GO:0005634:nucleus;	GO:0046872:metal ion binding;	K09228	;ko05168 Herpes simplex virus 1 infection;
ENSG00000010610	4557	9	0.13	21	0.23	13	0.13	17	0.21	11	0.16	15	0.21	15	0.19	11	0.16	3	0.04	12	0.16	12	0.14	13	0.17	17	0.18	15	0.19	14	0.17	12	6786858	6820799	+	CD4	CD4 molecule [Source:HGNC Symbol%3BAcc:HGNC:1678]	GO:0002250:adaptive immune response;GO:0007155:cell adhesion;GO:0007166:cell surface receptor signaling pathway;GO:0097011:cellular response to granulocyte macrophage colony-stimulating factor stimulus;GO:0050829:defense response to Gram-negative bacterium;GO:0007167:enzyme-linked receptor protein signaling pathway;GO:0035397:helper T cell enhancement of adaptive immune response;GO:0006955:immune…	GO:0030669:clathrin-coated endocytic vesicle membrane;GO:0005769:early endosome;GO:0005788:endoplasmic reticulum lumen;GO:0005789:endoplasmic reticulum membrane;GO:0009897:external side of plasma membrane;GO:0045121:membrane raft;GO:0005886:plasma membrane;GO:0042101:T cell receptor complex;	GO:0015026:coreceptor activity;GO:0019899:enzyme binding;GO:0005201:extracellular matrix structural constituent;GO:0042802:identical protein binding;GO:0042011:interleukin-16 binding;GO:0042012:interleukin-16 receptor activity;GO:0042289:MHC class II protein binding;GO:0023026:MHC class II protein complex binding;GO:0042803:protein homodimerization activity;GO:0019901:protein kinase binding;GO:19…	K06454	;ko03250 Viral life cycle - HIV-1;ko03260 Virion - Human immunodeficiency virus;ko04060 Cytokine-cytokine receptor interaction;ko04514 Cell adhesion molecules;ko04612 Antigen processing and presentation;ko04640 Hematopoietic cell lineage;ko04658 Th1 and Th2 cell differentiation;ko04659 Th17 cell differentiation;ko04660 T cell receptor signaling pathway;ko05135 Yersinia infection;ko05166 Human T-c…
ENSG00000010626	3052	52	1.15	78	1.28	71	1.05	74	1.39	38	0.82	64	1.33	73	1.39	73	1.56	59	1.13	63	1.22	73	1.26	78	1.51	79	1.25	82	1.52	76	1.39	12	6873569	6914241	+	LRRC23	leucine rich repeat containing 23 [Source:HGNC Symbol%3BAcc:HGNC:19138]	-	GO:0005737:cytoplasm;GO:0005829:cytosol;	-	K10344	-
ENSG00000010671	7817	0	0	2	0.01	0	0	0	0	0	0	1	0.01	1	0.01	6	0.05	2	0.01	2	0.02	3	0.02	0	0	1	0.01	0	0	7	0.05	X	101349338	101390796	-	BTK	Bruton tyrosine kinase [Source:HGNC Symbol%3BAcc:HGNC:1133]	GO:0002250:adaptive immune response;GO:0097190:apoptotic signaling pathway;GO:0042113:B cell activation;GO:0002344:B cell affinity maturation;GO:0050853:B cell receptor signaling pathway;GO:0019722:calcium-mediated signaling;GO:0048469:cell maturation;GO:0098761:cellular response to interleukin-7;GO:0071226:cellular response to molecule of fungal origin;GO:0034614:cellular response to reactive ox…	GO:0005737:cytoplasm;GO:0031410:cytoplasmic vesicle;GO:0005829:cytosol;GO:0045121:membrane raft;GO:0005634:nucleus;GO:0048471:perinuclear region of cytoplasm;GO:0005886:plasma membrane;GO:0070062:extracellular exosome;GO:0016020:membrane;	GO:0005524:ATP binding;GO:0042802:identical protein binding;GO:0046872:metal ion binding;GO:0004715:non-membrane spanning protein tyrosine kinase activity;GO:0005547:phosphatidylinositol-3,4,5-trisphosphate binding;GO:0016004:phospholipase activator activity;GO:0043274:phospholipase binding;GO:0004713:protein tyrosine kinase activity;GO:0004714:transmembrane receptor protein tyrosine kinase activ…	K07370;K04613	-
ENSG00000010704	5675	220	2.62	254	2.24	282	2.25	289	2.92	201	2.33	228	2.56	262	2.69	214	2.46	246	2.54	235	2.44	269	2.51	272	2.84	353	3	306	3.06	320	3.14	6	26087281	26098343	+	HFE	homeostatic iron regulator [Source:HGNC Symbol%3BAcc:HGNC:4886]	GO:0098711:iron ion import across plasma membrane;GO:0002626:negative regulation of T cell antigen processing and presentation;	GO:1990712:HFE-transferrin receptor complex;	GO:1990459:transferrin receptor binding;	K11253	;ko04613 Neutrophil extracellular trap formation;ko05034 Alcoholism;ko05131 Shigellosis;ko05202 Transcriptional misregulation in cancer;ko05322 Systemic lupus erythematosus;
ENSG00000010803	4602	461	6.76	617	6.71	705	6.95	585	7.28	493	7.04	496	6.86	535	6.76	502	7.1	522	6.65	512	6.55	589	6.76	531	6.83	676	7.1	614	7.56	643	7.77	1	41027202	41242306	-	SCMH1	Scm polycomb group protein homolog 1 [Source:HGNC Symbol%3BAcc:HGNC:19003]	GO:0009952:anterior/posterior pattern specification;GO:0006338:chromatin remodeling;GO:0016458:obsolete gene silencing;GO:0045892:negative regulation of DNA-templated transcription;GO:0007283:spermatogenesis;	GO:0010369:chromocenter;GO:0005654:nucleoplasm;GO:0005634:nucleus;	GO:0003682:chromatin binding;GO:0042393:histone binding;	K11461	;ko03083 Polycomb repressive complex;
ENSG00000010810	7411	173	1.58	265	1.79	269	1.65	225	1.74	192	1.7	203	1.74	237	1.86	211	1.85	203	1.61	232	1.84	256	1.83	225	1.8	225	1.47	195	1.49	224	1.68	6	111660332	111873452	-	FYN	FYN proto-oncogene%2C Src family tyrosine kinase [Source:HGNC Symbol%3BAcc:HGNC:4037]	GO:0050798:activated T cell proliferation;GO:0002250:adaptive immune response;GO:0007411:axon guidance;GO:0006816:calcium ion transport;GO:0030154:cell differentiation;GO:0030900:forebrain development;GO:0045087:innate immune response;GO:0001764:neuron migration;GO:0018108:peptidyl-tyrosine phosphorylation;GO:0008360:regulation of cell shape;GO:0050852:T cell receptor signaling pathway;GO:0007169…	GO:0005829:cytosol;GO:0005815:microtubule organizing center;GO:0005886:plasma membrane;GO:0005884:actin filament;GO:0044297:cell body;GO:0030425:dendrite;GO:0031234:extrinsic component of cytoplasmic side of plasma membrane;GO:0045121:membrane raft;GO:0005768:endosome;GO:0097386:glial cell projection;GO:0005634:nucleus;GO:0014069:postsynaptic density;GO:0098685:Schaffer collateral - CA1 synapse;	GO:0005524:ATP binding;GO:0004715:non-membrane spanning protein tyrosine kinase activity;GO:0004714:transmembrane receptor protein tyrosine kinase activity;GO:0043014:alpha-tubulin binding;GO:0042609:CD4 receptor binding;GO:0042610:CD8 receptor binding;GO:0046872:metal ion binding;GO:0004672:protein kinase activity;GO:0004713:protein tyrosine kinase activity;GO:0005102:signaling receptor binding;…	K05703	;ko04071 Sphingolipid signaling pathway;ko04072 Phospholipase D signaling pathway;ko04360 Axon guidance;ko04380 Osteoclast differentiation;ko04510 Focal adhesion;ko04520 Adherens junction;ko04611 Platelet activation;ko04650 Natural killer cell mediated cytotoxicity;ko04660 T cell receptor signaling pathway;ko04664 Fc epsilon RI signaling pathway;ko04725 Cholinergic synapse;ko05020 Prion disease;k…
ENSG00000010818	10655	487	3.09	708	3.33	735	3.13	690	3.71	512	3.16	564	3.37	650	3.55	648	3.96	677	3.72	650	3.59	682	3.38	573	3.19	624	2.83	491	2.61	547	2.86	6	142751469	142956698	-	HIVEP2	HIVEP zinc finger 2 [Source:HGNC Symbol%3BAcc:HGNC:4921]	GO:0006357:regulation of transcription by RNA polymerase II;	GO:0005654:nucleoplasm;GO:0005634:nucleus;	GO:0003677:DNA binding;GO:0000981:DNA-binding transcription factor activity, RNA polymerase II-specific;GO:0046872:metal ion binding;GO:0000978:RNA polymerase II cis-regulatory region sequence-specific DNA binding;	K09239	-
ENSG00000010932	3602	0	0	2	0.03	2	0.03	0	0	2	0.04	1	0.02	0	0	0	0	1	0.02	1	0.02	0	0	1	0.02	2	0.03	1	0.02	2	0.03	1	171248471	171285978	+	FMO1	flavin containing dimethylaniline monoxygenase 1 [Source:HGNC Symbol%3BAcc:HGNC:3769]	GO:0070995:NADPH oxidation;GO:0006082:organic acid metabolic process;GO:0009404:toxin metabolic process;GO:0032496:response to lipopolysaccharide;GO:0006970:response to osmotic stress;	GO:0005789:endoplasmic reticulum membrane;GO:0005788:endoplasmic reticulum lumen;	GO:0050660:flavin adenine dinucleotide binding;GO:0004497:monooxygenase activity;GO:0004499:N,N-dimethylaniline monooxygenase activity;GO:0050661:NADP binding;	K00485	;ko00430 Taurine and hypotaurine metabolism;ko00982 Drug metabolism - cytochrome P450;ko01100 Metabolic pathways;
ENSG00000011007	5348	1699	21.45	2404	22.5	2600	22.04	2083	22.31	1700	20.9	1711	20.36	1949	21.21	1798	21.89	2031	22.25	1935	21.31	2286	22.59	1954	21.64	2211	19.97	1903	20.16	1904	19.81	1	23743448	23762059	+	ELOA	elongin A [Source:HGNC Symbol%3BAcc:HGNC:11620]	GO:0006357:regulation of transcription by RNA polymerase II;GO:0006368:transcription elongation by RNA polymerase II;	GO:0070449:elongin complex;GO:0005615:extracellular space;GO:0005654:nucleoplasm;GO:0090734:site of DNA damage;	-	K15076	-
ENSG00000011009	2021	491	16.4	646	16	793	17.79	666	18.87	542	17.64	542	17.06	634	18.25	531	17.11	677	19.63	667	19.44	774	20.24	640	18.76	707	16.9	608	17.05	646	17.79	1	23791145	23795539	+	LYPLA2	lysophospholipase 2 [Source:HGNC Symbol%3BAcc:HGNC:6738]	GO:0046464:acylglycerol catabolic process;GO:0007411:axon guidance;GO:0006631:fatty acid metabolic process;GO:1905344:prostaglandin catabolic process;GO:0002084:protein depalmitoylation;	GO:0005737:cytoplasm;GO:0005829:cytosol;GO:0070062:extracellular exosome;GO:0005795:Golgi stack;	GO:0045296:cadherin binding;GO:0052689:carboxylic ester hydrolase activity;GO:0004622:lysophospholipase activity;GO:0008474:palmitoyl-(protein) hydrolase activity;	K06130	;ko00564 Glycerophospholipid metabolism;
ENSG00000011021	8173	509	4.2	675	4.13	719	3.99	622	4.36	482	3.88	540	4.2	583	4.15	550	4.38	600	4.3	605	4.36	598	3.87	600	4.35	738	4.36	564	3.91	587	4	1	11806096	11848079	+	CLCN6	chloride voltage-gated channel 6 [Source:HGNC Symbol%3BAcc:HGNC:2024]	GO:0006884:cell volume homeostasis;GO:0006821:chloride transport;GO:0034220:monoatomic ion transmembrane transport;GO:0009612:response to mechanical stimulus;GO:0007165:signal transduction;	GO:0010008:endosome membrane;GO:0043231:intracellular membrane-bounded organelle;GO:0005765:lysosomal membrane;	GO:0015297:antiporter activity;GO:0005524:ATP binding;GO:0015108:chloride transmembrane transporter activity;GO:0005247:voltage-gated chloride channel activity;	K05015;K12334	-;ko04022 cGMP-PKG signaling pathway;ko04024 cAMP signaling pathway;ko04066 HIF-1 signaling pathway;ko04270 Vascular smooth muscle contraction;ko04714 Thermogenesis;ko04921 Oxytocin signaling pathway;ko04923 Regulation of lipolysis in adipocytes;ko04924 Renin secretion;ko04925 Aldosterone synthesis and secretion;ko05143 African trypanosomiasis;
ENSG00000011028	6591	1291	13.22	1652	12.55	1958	13.47	1485	12.9	1361	13.58	1429	13.79	1628	14.37	1437	14.2	1548	13.76	1417	12.66	1705	13.67	1432	12.87	2033	14.9	1642	14.12	1800	15.2	17	62627670	62693597	+	MRC2	mannose receptor C type 2 [Source:HGNC Symbol%3BAcc:HGNC:16875]	GO:0030574:collagen catabolic process;GO:0006897:endocytosis;GO:0001649:osteoblast differentiation;	GO:0005925:focal adhesion;GO:0016020:membrane;GO:0009986:cell surface;GO:0005886:plasma membrane;	GO:0030246:carbohydrate binding;GO:0005518:collagen binding;GO:0038023:signaling receptor activity;	K06560	;ko04145 Phagosome;ko05152 Tuberculosis;
ENSG00000011052	1241	4	0.22	15	0.61	14	0.51	10	0.46	9	0.48	6	0.31	11	0.52	7	0.37	10	0.47	9	0.43	11	0.47	9	0.43	17	0.66	9	0.41	13	0.58	17	51153590	51171744	+	NME1-NME2	NME1-NME2 readthrough [Source:HGNC Symbol%3BAcc:HGNC:33531]	GO:0030154:cell differentiation;GO:0071398:cellular response to fatty acid;GO:0071333:cellular response to glucose stimulus;GO:0006241:CTP biosynthetic process;GO:0006897:endocytosis;GO:0006183:GTP biosynthetic process;GO:0021766:hippocampus development;GO:0007595:lactation;GO:0008285:negative regulation of cell population proliferation;GO:0010629:negative regulation of gene expression;GO:0002762…	GO:0005813:centrosome;GO:0005737:cytoplasm;GO:0005829:cytosol;GO:0070062:extracellular exosome;GO:0005882:intermediate filament;GO:0016020:membrane;GO:0005741:mitochondrial outer membrane;GO:0005634:nucleus;GO:0048471:perinuclear region of cytoplasm;GO:0032587:ruffle membrane;GO:0071944:cell periphery;GO:0005576:extracellular region;GO:1904813:ficolin-1-rich granule lumen;GO:0030027:lamellipodium…	GO:0005524:ATP binding;GO:0004536:DNA nuclease activity;GO:0019899:enzyme binding;GO:0043015:gamma-tubulin binding;GO:0005525:GTP binding;GO:0042802:identical protein binding;GO:0019215:intermediate filament binding;GO:0000287:magnesium ion binding;GO:0004550:nucleoside diphosphate kinase activity;GO:0043024:ribosomal small subunit binding;GO:0003723:RNA binding;GO:0000977:RNA polymerase II trans…	K00940	;ko00230 Purine metabolism;ko00240 Pyrimidine metabolism;ko00983 Drug metabolism - other enzymes;ko01100 Metabolic pathways;ko01232 Nucleotide metabolism;ko01240 Biosynthesis of cofactors;
ENSG00000011083	4277	2	0.03	2	0.02	3	0.03	0	0	2	0.03	1	0.01	0	0	3	0.05	1	0.01	2	0.03	1	0.01	4	0.06	1	0.01	1	0.01	2	0.03	5	150190062	150222788	+	SLC6A7	solute carrier family 6 member 7 [Source:HGNC Symbol%3BAcc:HGNC:11054]	GO:0006836:neurotransmitter transport;GO:0015824:proline transport;GO:0035725:sodium ion transmembrane transport;	GO:0016020:membrane;GO:0005886:plasma membrane;	GO:0015193:L-proline transmembrane transporter activity;GO:0005298:proline:sodium symporter activity;	K05038	;ko04721 Synaptic vesicle cycle;
ENSG00000011105	6905	210	2.05	314	2.28	341	2.24	208	1.73	232	2.21	190	1.75	291	2.45	260	2.45	232	1.97	229	1.95	286	2.19	241	2.07	309	2.16	241	1.98	273	2.2	12	3077355	3286564	+	TSPAN9	tetraspanin 9 [Source:HGNC Symbol%3BAcc:HGNC:21640]	-	GO:0005925:focal adhesion;GO:0005886:plasma membrane;GO:0097197:tetraspanin-enriched microdomain;GO:0016020:membrane;	-	K17350	-
ENSG00000011114	11333	660	3.93	835	3.69	922	3.69	693	3.5	591	3.43	614	3.45	710	3.65	622	3.57	746	3.86	777	4.04	761	3.55	701	3.66	920	3.92	756	3.78	732	3.59	14	93237550	93333092	-	BTBD7	BTB domain containing 7 [Source:HGNC Symbol%3BAcc:HGNC:18269]	GO:0061138:morphogenesis of a branching epithelium;GO:0060693:regulation of branching involved in salivary gland morphogenesis;	GO:0005634:nucleus;	-	K10479	-
ENSG00000011132	5596	61	0.74	68	0.61	99	0.8	59	0.6	64	0.75	52	0.59	59	0.61	50	0.58	62	0.65	62	0.65	82	0.77	69	0.73	77	0.66	75	0.76	74	0.74	19	3750772	3761692	-	APBA3	amyloid beta precursor protein binding family A member 3 [Source:HGNC Symbol%3BAcc:HGNC:580]	GO:0007268:chemical synaptic transmission;GO:0001701:in utero embryonic development;GO:0043086:negative regulation of catalytic activity;GO:0015031:protein transport;GO:0010468:regulation of gene expression;	GO:0005737:cytoplasm;GO:0043197:dendritic spine;GO:0048471:perinuclear region of cytoplasm;GO:0005886:plasma membrane;	GO:0001540:amyloid-beta binding;GO:0019899:enzyme binding;GO:0004857:enzyme inhibitor activity;	K04531;K17985	-;ko04137 Mitophagy - animal;ko04140 Autophagy - animal;ko05010 Alzheimer disease;ko05014 Amyotrophic lateral sclerosis;ko05016 Huntington disease;ko05017 Spinocerebellar ataxia;ko05022 Pathways of neurodegeneration - multiple diseases;
ENSG00000011143	11285	234	1.4	347	1.54	306	1.23	251	1.27	248	1.45	260	1.47	266	1.37	221	1.28	223	1.16	217	1.13	326	1.53	235	1.23	364	1.56	306	1.54	314	1.55	17	58205441	58219605	-	MKS1	MKS transition zone complex subunit 1 [Source:HGNC Symbol%3BAcc:HGNC:7121]	GO:0048754:branching morphogenesis of an epithelial tube;GO:0060411:cardiac septum morphogenesis;GO:0060271:cilium assembly;GO:0061009:common bile duct development;GO:0007368:determination of left/right symmetry;GO:1990403:embryonic brain development;GO:0042733:embryonic digit morphogenesis;GO:0048706:embryonic skeletal system development;GO:0010669:epithelial structure maintenance;GO:0060322:hea…	GO:0005814:centriole;GO:0005813:centrosome;GO:0036064:ciliary basal body;GO:0005737:cytoplasm;GO:0005829:cytosol;GO:0016020:membrane;GO:0036038:MKS complex;GO:0035869:ciliary transition zone;	-	K19332	-
ENSG00000011198	7539	778	6.97	1075	7.14	1292	7.77	953	7.24	893	7.79	984	8.3	1023	7.9	850	7.34	1001	7.78	1069	8.35	1113	7.8	908	7.13	1244	7.97	976	7.34	920	6.79	3	43690108	43734371	+	ABHD5	abhydrolase domain containing 5%2C lysophosphatidic acid acyltransferase [Source:HGNC Symbol%3BAcc:HGNC:21396]	GO:0030154:cell differentiation;GO:0006631:fatty acid metabolic process;GO:0055088:lipid homeostasis;GO:0010891:negative regulation of sequestering of triglyceride;GO:0006654:phosphatidic acid biosynthetic process;GO:0051006:positive regulation of lipoprotein lipase activity;GO:0010898:positive regulation of triglyceride catabolic process;	GO:0005829:cytosol;GO:0043231:intracellular membrane-bounded organelle;GO:0005811:lipid droplet;GO:0005739:mitochondrion;GO:0005654:nucleoplasm;	GO:0003841:1-acylglycerol-3-phosphate O-acyltransferase activity;GO:0052689:carboxylic ester hydrolase activity;GO:0042171:lysophosphatidic acid acyltransferase activity;	K13699	;ko04923 Regulation of lipolysis in adipocytes;
ENSG00000011201	7082	589	5.61	820	5.8	770	4.93	607	4.91	571	5.3	599	5.38	668	5.49	587	5.4	575	4.76	688	5.72	621	4.63	573	4.79	1131	7.71	860	6.88	853	6.7	X	8528874	8732137	-	ANOS1	anosmin 1 [Source:HGNC Symbol%3BAcc:HGNC:6211]	GO:0007411:axon guidance;GO:0007155:cell adhesion;GO:0006935:chemotaxis;GO:0030182:neuron differentiation;	GO:0009986:cell surface;GO:0031012:extracellular matrix;GO:0005576:extracellular region;GO:0005615:extracellular space;GO:0005886:plasma membrane;	GO:0005201:extracellular matrix structural constituent;GO:0008201:heparin binding;GO:0004867:serine-type endopeptidase inhibitor activity;	-	-
ENSG00000011243	8576	648	5.1	923	5.39	1001	5.29	866	5.78	690	5.29	758	5.62	707	4.8	710	5.39	786	5.37	777	5.34	813	5.01	777	5.37	874	4.92	772	5.1	787	5.11	19	15380050	15419141	-	AKAP8L	A-kinase anchoring protein 8 like [Source:HGNC Symbol%3BAcc:HGNC:29857]	GO:0044839:cell cycle G2/M phase transition;GO:0007076:mitotic chromosome condensation;GO:0006397:mRNA processing;GO:0051081:nuclear membrane disassembly;GO:0031065:positive regulation of histone deacetylation;GO:0045944:positive regulation of transcription by RNA polymerase II;GO:0033127:obsolete regulation of histone phosphorylation;GO:0010793:regulation of mRNA export from nucleus;GO:0008380:R…	GO:0000785:chromatin;GO:0005737:cytoplasm;GO:0016363:nuclear matrix;GO:0016607:nuclear speck;GO:0005634:nucleus;GO:0016605:PML body;GO:1990904:ribonucleoprotein complex;	GO:0017151:DEAD/H-box RNA helicase binding;GO:0003677:DNA binding;GO:0042826:histone deacetylase binding;GO:0005521:lamin binding;GO:0046872:metal ion binding;GO:0034237:protein kinase A regulatory subunit binding;GO:0003723:RNA binding;	K15978	-
ENSG00000011258	7184	566	5.32	761	5.3	754	4.76	657	5.24	564	5.16	567	5.02	698	5.65	572	5.19	663	5.41	663	5.44	630	4.64	626	5.16	793	5.33	650	5.13	693	5.37	17	51177425	51260163	-	MBTD1	mbt domain containing 1 [Source:HGNC Symbol%3BAcc:HGNC:19866]	GO:0006325:chromatin organization;GO:0048706:embryonic skeletal system development;GO:0045892:negative regulation of DNA-templated transcription;	GO:0005634:nucleus;	GO:0003682:chromatin binding;GO:0042393:histone binding;GO:0035064:methylated histone binding;GO:0008270:zinc ion binding;	K15696;K14553	-;ko03008 Ribosome biogenesis in eukaryotes;
ENSG00000011260	2703	1307	32.64	1717	31.8	1974	33.11	1542	32.67	1378	33.53	1359	31.99	1371	29.51	1312	31.61	1482	32.13	1445	31.49	1690	33.05	1546	33.88	1717	30.68	1566	32.83	1578	32.48	17	51260546	51297936	+	UTP18	UTP18 small subunit processome component [Source:HGNC Symbol%3BAcc:HGNC:24274]	GO:0006364:rRNA processing;	GO:0031965:nuclear membrane;GO:0005730:nucleolus;GO:0005654:nucleoplasm;GO:0005634:nucleus;GO:0034388:Pwp2p-containing subcomplex of 90S preribosome;GO:0032040:small-subunit processome;	GO:0003723:RNA binding;	K14553	;ko03008 Ribosome biogenesis in eukaryotes;
ENSG00000011275	7576	733	6.53	995	6.57	1090	6.52	929	7.02	800	6.94	820	6.89	880	6.76	743	6.39	855	6.61	797	6.2	950	6.63	899	7.03	1004	6.4	886	6.63	923	6.78	7	5620047	5781696	-	RNF216	ring finger protein 216 [Source:HGNC Symbol%3BAcc:HGNC:21698]	GO:0006915:apoptotic process;GO:0032480:negative regulation of type I interferon production;GO:0043161:proteasome-mediated ubiquitin-dependent protein catabolic process;GO:0099546:protein catabolic process, modulating synaptic transmission;GO:0070936:protein K48-linked ubiquitination;GO:0050691:regulation of defense response to virus by host;GO:0032648:regulation of interferon-beta production;	GO:0005829:cytosol;GO:0098978:glutamatergic synapse;GO:0005654:nucleoplasm;GO:0005634:nucleus;GO:0098843:postsynaptic endocytic zone;GO:0098685:Schaffer collateral - CA1 synapse;	GO:0046872:metal ion binding;GO:0061630:ubiquitin protein ligase activity;	K11976	-
ENSG00000011295	6054	772	8.61	1147	9.48	1163	8.71	914	8.65	835	9.07	827	8.69	969	9.31	875	9.41	943	9.13	913	8.88	1039	9.07	952	9.31	1234	9.85	1026	9.6	1160	10.66	17	15999784	16045015	+	TTC19	tetratricopeptide repeat domain 19 [Source:HGNC Symbol%3BAcc:HGNC:26006]	GO:0034551:mitochondrial respiratory chain complex III assembly;GO:0000281:mitotic cytokinesis;	GO:0005813:centrosome;GO:0030496:midbody;GO:0005743:mitochondrial inner membrane;GO:0005739:mitochondrion;GO:0070469:respirasome;	-	K18169;K02942	-;ko03010 Ribosome;ko05171 Coronavirus disease - COVID-19;
ENSG00000011304	7521	4262	38.25	5591	37.21	6291	37.93	4327	32.95	3959	34.62	4190	35.45	5093	39.4	4204	36.4	4900	38.17	4748	37.19	5733	40.29	4609	36.3	5950	38.21	4899	36.91	5304	39.24	19	797075	812327	+	PTBP1	polypyrimidine tract binding protein 1 [Source:HGNC Symbol%3BAcc:HGNC:9583]	GO:0075522:IRES-dependent viral translational initiation;GO:0006397:mRNA processing;GO:0048025:negative regulation of mRNA splicing, via spliceosome;GO:0051148:negative regulation of muscle cell differentiation;GO:0033119:negative regulation of RNA splicing;GO:0070886:positive regulation of calcineurin-NFAT signaling cascade;GO:0035307:positive regulation of protein dephosphorylation;GO:0000381:r…	GO:0070062:extracellular exosome;GO:0016020:membrane;GO:0005730:nucleolus;GO:0005654:nucleoplasm;GO:0005634:nucleus;	GO:0003729:mRNA binding;GO:0008187:poly-pyrimidine tract binding;GO:0036002:pre-mRNA binding;GO:0003723:RNA binding;	K13218;K09228	-;ko05168 Herpes simplex virus 1 infection;
ENSG00000011332	4800	24	0.34	28	0.29	43	0.41	26	0.31	29	0.4	29	0.38	29	0.35	22	0.3	38	0.46	30	0.37	24	0.26	27	0.33	31	0.31	27	0.32	30	0.35	19	38211006	38229714	-	DPF1	double PHD fingers 1 [Source:HGNC Symbol%3BAcc:HGNC:20225]	GO:0045892:negative regulation of DNA-templated transcription;GO:0007399:nervous system development;GO:0045944:positive regulation of transcription by RNA polymerase II;GO:0006915:apoptotic process;	GO:0005737:cytoplasm;GO:0071565:nBAF complex;	GO:0042393:histone binding;GO:1990837:sequence-specific double-stranded DNA binding;GO:0003712:transcription coregulator activity;GO:0008270:zinc ion binding;	K13196	;ko03082 ATP-dependent chromatin remodeling;
ENSG00000011347	7552	44	0.39	39	0.26	54	0.32	34	0.26	26	0.23	29	0.24	43	0.33	28	0.24	30	0.23	32	0.25	42	0.29	47	0.37	39	0.25	36	0.27	37	0.27	11	61513714	61581148	-	SYT7	synaptotagmin 7 [Source:HGNC Symbol%3BAcc:HGNC:11514]	GO:1990927:calcium ion regulated lysosome exocytosis;GO:0048791:calcium ion-regulated exocytosis of neurotransmitter;GO:0017156:calcium-ion regulated exocytosis;GO:0071277:cellular response to calcium ion;GO:0006909:phagocytosis;GO:0090385:phagosome-lysosome fusion;GO:0001778:plasma membrane repair;GO:0045956:positive regulation of calcium ion-dependent exocytosis;GO:0046850:regulation of bone re…	GO:0042995:cell projection;GO:0005829:cytosol;GO:0031045:dense core granule;GO:0032009:early phagosome;GO:0070382:exocytic vesicle;GO:0070062:extracellular exosome;GO:0098686:hippocampal mossy fiber to CA3 synapse;GO:0099056:obsolete integral component of presynaptic membrane;GO:0005765:lysosomal membrane;GO:0005764:lysosome;GO:0005778:peroxisomal membrane;GO:0005777:peroxisome;GO:0030670:phagocy…	GO:0005509:calcium ion binding;GO:0005544:calcium-dependent phospholipid binding;GO:0005516:calmodulin binding;GO:0030276:clathrin binding;GO:0005546:phosphatidylinositol-4,5-bisphosphate binding;GO:0001786:phosphatidylserine binding;GO:0000149:SNARE binding;GO:0019905:syntaxin binding;	-	-
ENSG00000011376	12407	1094	5.95	1342	5.41	1531	5.6	1302	6.01	1055	5.59	1017	5.22	1071	5.02	1061	5.57	1161	5.48	1091	5.18	1407	5.99	1236	5.9	1262	4.91	1133	5.17	1141	5.12	3	45388561	45554726	+	LARS2	leucyl-tRNA synthetase 2%2C mitochondrial [Source:HGNC Symbol%3BAcc:HGNC:17095]	GO:0006429:leucyl-tRNA aminoacylation;GO:0032543:mitochondrial translation;GO:0006418:tRNA aminoacylation for protein translation;	GO:0005759:mitochondrial matrix;GO:0005739:mitochondrion;	GO:0002161:aminoacyl-tRNA editing activity;GO:0005524:ATP binding;GO:0004823:leucine-tRNA ligase activity;	K01869	;ko00970 Aminoacyl-tRNA biosynthesis;
ENSG00000011405	9207	1800	13.2	2446	13.3	2563	12.62	2043	12.71	1947	13.91	2076	14.35	1969	12.44	1864	13.18	2002	12.74	2341	14.98	2272	13.04	2012	12.94	2571	13.49	2131	13.12	2042	12.34	11	17077730	17207986	-	PIK3C2A	phosphatidylinositol-4-phosphate 3-kinase catalytic subunit type 2 alpha [Source:HGNC Symbol%3BAcc:HGNC:8971]	GO:0016477:cell migration;GO:0048268:clathrin coat assembly;GO:0006897:endocytosis;GO:0007173:epidermal growth factor receptor signaling pathway;GO:0006887:exocytosis;GO:0008286:insulin receptor signaling pathway;GO:0061024:membrane organization;GO:0014065:obsolete phosphatidylinositol 3-kinase signaling;GO:0006661:phosphatidylinositol biosynthetic process;GO:0046854:phosphatidylinositol phosphat…	GO:0030136:clathrin-coated vesicle;GO:0005737:cytoplasm;GO:0005829:cytosol;GO:0070062:extracellular exosome;GO:0043231:intracellular membrane-bounded organelle;GO:0016020:membrane;GO:0005654:nucleoplasm;GO:0005942:phosphatidylinositol 3-kinase complex;GO:0005886:plasma membrane;GO:0005802:trans-Golgi network;GO:0031982:vesicle;	GO:0016303:1-phosphatidylinositol-3-kinase activity;GO:0035005:1-phosphatidylinositol-4-phosphate 3-kinase activity;GO:0005524:ATP binding;GO:0030276:clathrin binding;GO:0035004:obsolete phosphatidylinositol 3-kinase activity;GO:0035091:phosphatidylinositol binding;GO:0052742:phosphatidylinositol kinase activity;GO:0052812:obsolete 1-phosphatidylinositol-3,4-bisphosphate 5-kinase activity;GO:0046…	K00923	;ko00562 Inositol phosphate metabolism;ko01100 Metabolic pathways;ko04070 Phosphatidylinositol signaling system;ko05132 Salmonella infection;
ENSG00000011422	4457	509	7.71	767	8.61	796	8.1	588	7.56	500	7.38	542	7.74	602	7.86	555	8.11	603	7.93	574	7.59	770	9.13	650	8.64	669	7.25	511	6.5	630	7.87	19	43646095	43670547	-	PLAUR	plasminogen activator%2C urokinase receptor [Source:HGNC Symbol%3BAcc:HGNC:9053]	GO:0030162:regulation of proteolysis;GO:0007596:blood coagulation;GO:0006935:chemotaxis;GO:0043066:negative regulation of apoptotic process;GO:2001268:negative regulation of cysteine-type endopeptidase activity involved in apoptotic signaling pathway;GO:2001243:negative regulation of intrinsic apoptotic signaling pathway;GO:0043388:positive regulation of DNA binding;GO:0045742:positive regulation…	GO:0031225:obsolete anchored component of membrane;GO:0030054:cell junction;GO:0042995:cell projection;GO:0005886:plasma membrane;GO:0009986:cell surface;GO:0005788:endoplasmic reticulum lumen;GO:0005789:endoplasmic reticulum membrane;GO:0005576:extracellular region;GO:0019898:extrinsic component of membrane;GO:0005925:focal adhesion;GO:0035579:specific granule membrane;	GO:0030377:urokinase plasminogen activator receptor activity;GO:0019899:enzyme binding;GO:0019904:protein domain specific binding;GO:0038023:signaling receptor activity;GO:0005102:signaling receptor binding;	K03985	;ko04610 Complement and coagulation cascades;ko05205 Proteoglycans in cancer;
ENSG00000011426	5997	5196	58.49	7116	59.4	7436	56.22	4553	43.48	4066	44.59	4495	47.69	6089	59.08	5133	55.74	5981	58.44	5118	50.27	5777	50.92	5238	51.73	6412	51.64	5600	52.92	5853	54.31	7	36389821	36453791	+	ANLN	anillin actin binding protein [Source:HGNC Symbol%3BAcc:HGNC:14082]	GO:0000915:actomyosin contractile ring assembly;GO:0090521:podocyte cell migration;GO:0000281:mitotic cytokinesis;GO:1904172:positive regulation of bleb assembly;GO:0007096:regulation of exit from mitosis;GO:0000921:septin ring assembly;GO:0031106:septin ring organization;GO:0007049:cell cycle;GO:0051301:cell division;	GO:0015629:actin cytoskeleton;GO:0005826:actomyosin contractile ring;GO:0032059:bleb;GO:0099738:cell cortex region;GO:0005829:cytosol;GO:0030496:midbody;GO:0005654:nucleoplasm;GO:0005856:cytoskeleton;GO:0005634:nucleus;	GO:0003779:actin binding;GO:0045296:cadherin binding;	K18621	-
ENSG00000011451	10037	381	2.56	495	2.47	608	2.75	421	2.4	362	2.37	439	2.78	478	2.77	423	2.74	481	2.81	506	2.97	594	3.13	463	2.73	567	2.73	431	2.43	453	2.51	19	15419978	15449956	-	WIZ	WIZ zinc finger [Source:HGNC Symbol%3BAcc:HGNC:30917]	GO:0010571:positive regulation of nuclear cell cycle DNA replication;GO:0050821:protein stabilization;GO:0006357:regulation of transcription by RNA polymerase II;	GO:0070062:extracellular exosome;GO:0030496:midbody;GO:0005654:nucleoplasm;GO:0005634:nucleus;	GO:0000981:DNA-binding transcription factor activity, RNA polymerase II-specific;GO:1990226:histone methyltransferase binding;GO:0046872:metal ion binding;GO:0044877:protein-containing complex binding;GO:0000978:RNA polymerase II cis-regulatory region sequence-specific DNA binding;GO:0001222:transcription corepressor binding;	K11447	;ko05202 Transcriptional misregulation in cancer;
ENSG00000011454	7656	1462	12.89	1930	12.62	2181	12.92	1896	14.18	1580	13.57	1590	13.21	1619	12.3	1530	13.01	1650	12.63	1604	12.34	1786	12.33	1648	12.75	1973	12.45	1739	12.87	1672	12.15	9	122940833	123104866	+	RABGAP1	RAB GTPase activating protein 1 [Source:HGNC Symbol%3BAcc:HGNC:17155]	GO:0090630:activation of GTPase activity;GO:0007049:cell cycle;GO:0006886:intracellular protein transport;GO:0043087:regulation of GTPase activity;	GO:0005813:centrosome;GO:0005829:cytosol;GO:0005875:microtubule associated complex;GO:0005815:microtubule organizing center;	GO:0005096:GTPase activator activity;GO:0031267:small GTPase binding;GO:0015631:tubulin binding;	K09488	;ko05012 Parkinson disease;ko05022 Pathways of neurodegeneration - multiple diseases;
ENSG00000011465	12941	862	4.5	1215	4.7	1289	4.52	1176	5.2	1128	5.73	1029	5.06	1194	5.37	1118	5.63	975	4.41	1065	4.85	1103	4.5	942	4.31	1938	7.23	1685	7.38	1525	6.56	12	91140484	91183217	-	DCN	decorin [Source:HGNC Symbol%3BAcc:HGNC:2705]	GO:0007568:obsolete aging;GO:0009887:animal organ morphogenesis;GO:0001822:kidney development;GO:0016525:negative regulation of angiogenesis;GO:0010596:negative regulation of endothelial cell migration;GO:1900747:negative regulation of vascular endothelial growth factor signaling pathway;GO:0019800:peptide cross-linking via chondroitin 4-sulfate glycosaminoglycan;GO:0001890:placenta development;G…	GO:0005589:collagen type VI trimer;GO:0062023:collagen-containing extracellular matrix;GO:0005576:extracellular region;GO:0005615:extracellular space;GO:0005796:Golgi lumen;GO:0043202:lysosomal lumen;	GO:0005518:collagen binding;GO:0050840:extracellular matrix binding;GO:0030021:extracellular matrix structural constituent conferring compression resistance;GO:0005539:glycosaminoglycan binding;GO:0047485:obsolete protein N-terminus binding;GO:0003723:RNA binding;GO:0046872:metal ion binding;GO:0003964:RNA-directed DNA polymerase activity;GO:0009036:type II site-specific deoxyribonuclease activit…	K04660	;ko04350 TGF-beta signaling pathway;ko05205 Proteoglycans in cancer;
ENSG00000011478	2825	169	4.04	262	4.64	272	4.37	197	3.99	161	3.75	174	3.92	230	4.74	189	4.36	243	5.04	189	3.94	282	5.28	196	4.11	246	4.21	209	4.19	239	4.71	19	45692403	45703989	+	QPCTL	glutaminyl-peptide cyclotransferase like [Source:HGNC Symbol%3BAcc:HGNC:25952]	GO:0017186:peptidyl-pyroglutamic acid biosynthetic process, using glutaminyl-peptide cyclotransferase;	GO:0005794:Golgi apparatus;GO:0000139:Golgi membrane;GO:0016020:membrane;	GO:0016603:glutaminyl-peptide cyclotransferase activity;GO:0008235:metalloexopeptidase activity;GO:0008270:zinc ion binding;	K00683	-
ENSG00000011485	7089	1321	12.58	1763	12.45	1985	12.7	1503	12.14	1254	11.63	1338	12.01	1477	12.12	1306	12	1555	12.85	1377	11.44	1620	12.08	1455	12.16	1691	11.52	1527	12.21	1551	12.17	19	46347087	46392981	+	PPP5C	protein phosphatase 5 catalytic subunit [Source:HGNC Symbol%3BAcc:HGNC:9322]	GO:0071276:cellular response to cadmium ion;GO:0070301:cellular response to hydrogen peroxide;GO:0006302:double-strand break repair;GO:0016576:obsolete histone dephosphorylation;GO:0000165:MAPK cascade;GO:0000278:mitotic cell cycle;GO:1901215:obsolete negative regulation of neuron death;GO:0001933:negative regulation of protein phosphorylation;GO:0070262:peptidyl-serine dephosphorylation;GO:00359…	GO:0101031:protein folding chaperone complex;GO:0005829:cytosol;GO:0043231:intracellular membrane-bounded organelle;GO:0005654:nucleoplasm;GO:0005634:nucleus;GO:0043204:perikaryon;GO:0005886:plasma membrane;GO:0032991:protein-containing complex;GO:1990635:proximal dendrite;GO:0071944:cell periphery;GO:0005737:cytoplasm;GO:0043005:neuron projection;GO:0043025:neuronal cell body;GO:0072686:mitotic …	GO:0043531:ADP binding;GO:0005524:ATP binding;GO:0001965:G-protein alpha-subunit binding;GO:0051879:Hsp90 protein binding;GO:0042802:identical protein binding;GO:0008289:lipid binding;GO:0046872:metal ion binding;GO:0008017:microtubule binding;GO:0016791:phosphatase activity;GO:0004721:phosphoprotein phosphatase activity;GO:0004722:protein serine/threonine phosphatase activity;GO:0044877:protein-…	K04460	;ko04010 MAPK signaling pathway;
ENSG00000011523	8623	216	1.69	288	1.67	257	1.35	233	1.55	201	1.53	202	1.49	202	1.36	233	1.76	223	1.52	224	1.53	249	1.53	193	1.33	324	1.81	288	1.89	238	1.54	2	65056366	65087004	+	CEP68	centrosomal protein 68 [Source:HGNC Symbol%3BAcc:HGNC:29076]	GO:0010457:centriole-centriole cohesion;GO:0007098:centrosome cycle;GO:0033365:protein localization to organelle;	GO:0030054:cell junction;GO:0034451:centriolar satellite;GO:0005813:centrosome;GO:0005829:cytosol;GO:0005654:nucleoplasm;	GO:0019904:protein domain specific binding;GO:0019901:protein kinase binding;	K16764	-
ENSG00000011566	6056	552	6.15	726	6	763	5.71	627	5.93	592	6.43	662	6.96	616	5.92	543	5.84	600	5.81	695	6.76	742	6.48	636	6.22	799	6.37	567	5.31	635	5.83	2	39249266	39437301	-	MAP4K3	mitogen-activated protein kinase kinase kinase kinase 3 [Source:HGNC Symbol%3BAcc:HGNC:6865]	GO:0035556:intracellular signal transduction;GO:0007254:JNK cascade;GO:0006468:protein phosphorylation;GO:0034612:response to tumor necrosis factor;GO:0009411:response to UV;	-	GO:0005524:ATP binding;GO:0008349:MAP kinase kinase kinase kinase activity;GO:0004672:protein kinase activity;GO:0106310:protein serine kinase activity;GO:0004674:protein serine/threonine kinase activity;GO:0017124:SH3 domain binding;	K04406	;ko04010 MAPK signaling pathway;
ENSG00000011590	2739	3	0.07	2	0.04	5	0.08	8	0.17	2	0.05	2	0.05	2	0.04	1	0.02	4	0.09	1	0.02	3	0.06	0	0	3	0.05	2	0.04	6	0.12	19	35704558	35717038	+	ZBTB32	zinc finger and BTB domain containing 32 [Source:HGNC Symbol%3BAcc:HGNC:16763]	GO:0000122:negative regulation of transcription by RNA polymerase II;GO:0006357:regulation of transcription by RNA polymerase II;	GO:0000785:chromatin;GO:0005654:nucleoplasm;GO:0005634:nucleus;	GO:0003677:DNA binding;GO:0000981:DNA-binding transcription factor activity, RNA polymerase II-specific;GO:0001227:DNA-binding transcription repressor activity, RNA polymerase II-specific;GO:0000978:RNA polymerase II cis-regulatory region sequence-specific DNA binding;GO:1990837:sequence-specific double-stranded DNA binding;GO:0008270:zinc ion binding;	K10506	-
ENSG00000011600	907	0	0	0	0	0	0	0	0	0	0	0	0	0	0	0	0	0	0	0	0	0	0	0	0	0	0	0	0	0	0	19	35904401	35908295	-	TYROBP	transmembrane immune signaling adaptor TYROBP [Source:HGNC Symbol%3BAcc:HGNC:12449]	GO:0030036:actin cytoskeleton organization;GO:0043277:apoptotic cell clearance;GO:0097190:apoptotic signaling pathway;GO:0006968:cellular defense response;GO:0030900:forebrain development;GO:0035556:intracellular signal transduction;GO:0002282:microglial cell activation involved in immune response;GO:0002274:myeloid leukocyte activation;GO:0030889:negative regulation of B cell proliferation;GO:00…	GO:0009986:cell surface;GO:0005886:plasma membrane;GO:0030667:secretory granule membrane;	GO:0042802:identical protein binding;GO:0046872:metal ion binding;GO:0042803:protein homodimerization activity;GO:0005102:signaling receptor binding;	K07992	;ko04380 Osteoclast differentiation;ko04650 Natural killer cell mediated cytotoxicity;
ENSG00000011638	2558	119	3.14	135	2.64	153	2.71	111	2.49	131	3.37	140	3.48	117	2.66	93	2.37	104	2.38	132	3.04	142	2.93	129	2.99	172	3.25	125	2.77	115	2.5	16	21158377	21180616	+	LDAF1	lipid droplet assembly factor 1 [Source:HGNC Symbol%3BAcc:HGNC:30136]	GO:0140042:lipid droplet formation;	GO:0005789:endoplasmic reticulum membrane;GO:0005811:lipid droplet;	-	K12581;K11667;K09488	;ko03018 RNA degradation;;ko03082 ATP-dependent chromatin remodeling;;ko05012 Parkinson disease;ko05022 Pathways of neurodegeneration - multiple diseases;
ENSG00000011677	4150	123	2	190	2.29	227	2.48	138	1.9	120	1.9	133	2.04	162	2.27	128	2.01	147	2.08	150	2.13	144	1.83	145	2.07	221	2.57	166	2.27	174	2.33	X	152166234	152451315	-	GABRA3	gamma-aminobutyric acid type A receptor subunit alpha3 [Source:HGNC Symbol%3BAcc:HGNC:4077]	GO:0007268:chemical synaptic transmission;GO:1902476:chloride transmembrane transport;GO:0007214:gamma-aminobutyric acid signaling pathway;GO:0034220:monoatomic ion transmembrane transport;GO:0050877:nervous system process;GO:0042391:regulation of membrane potential;GO:0060078:regulation of postsynaptic membrane potential;GO:0007165:signal transduction;GO:0051932:synaptic transmission, GABAergic;	GO:0034707:chloride channel complex;GO:0032590:dendrite membrane;GO:1902711:GABA-A receptor complex;GO:0098982:GABA-ergic synapse;GO:0099060:obsolete integral component of postsynaptic specialization membrane;GO:0043005:neuron projection;GO:0005886:plasma membrane;GO:0098794:postsynapse;GO:0045202:synapse;	GO:0008503:benzodiazepine receptor activity;GO:0004890:GABA-A receptor activity;GO:0022851:GABA-gated chloride ion channel activity;GO:0005237:inhibitory extracellular ligand-gated monoatomic ion channel activity;GO:0030594:neurotransmitter receptor activity;GO:1904315:transmitter-gated monoatomic ion channel activity involved in regulation of postsynaptic membrane potential;	K05175	;ko04080 Neuroactive ligand-receptor interaction;ko04723 Retrograde endocannabinoid signaling;ko04727 GABAergic synapse;ko04742 Taste transduction;ko05032 Morphine addiction;ko05033 Nicotine addiction;
ENSG00000012048	14160	1655	7.89	2316	8.19	2461	7.88	1935	7.83	1696	7.88	1698	7.63	1843	7.57	1649	7.58	1726	7.14	1676	6.97	1963	7.33	1746	7.3	2474	8.44	2276	9.11	2259	8.88	17	43044295	43170245	-	BRCA1	BRCA1 DNA repair associated [Source:HGNC Symbol%3BAcc:HGNC:1100]	GO:0006974:DNA damage response;GO:0071681:cellular response to indole-3-methanol;GO:0071356:cellular response to tumor necrosis factor;GO:0007098:centrosome cycle;	GO:0070531:BRCA1-A complex;GO:0031436:BRCA1-BARD1 complex;GO:0005694:chromosome;GO:0005737:cytoplasm;	GO:0003684:damaged DNA binding;GO:0003677:DNA binding;GO:0019899:enzyme binding;GO:0003723:RNA binding;	K10605;K16467	-
ENSG00000012061	5575	357	4.32	505	4.53	554	4.51	366	3.76	406	4.79	377	4.3	384	4.01	391	4.57	397	4.17	412	4.35	440	4.17	434	4.61	534	4.63	436	4.43	504	5.03	19	45407334	45478828	-	ERCC1	ERCC excision repair 1%2C endonuclease non-catalytic subunit [Source:HGNC Symbol%3BAcc:HGNC:3433]	GO:0008283:cell population proliferation;GO:0006310:DNA recombination;GO:0006281:DNA repair;GO:0006303:double-strand break repair via nonhomologous end joining;GO:0048568:embryonic organ development;GO:0036297:interstrand cross-link repair;GO:0045190:isotype switching;GO:0008584:male gonad development;GO:0000710:meiotic mismatch repair;GO:0006312:mitotic recombination;GO:0010259:obsolete multicel…	GO:0000781:chromosome, telomeric region;GO:0005737:cytoplasm;GO:0070522:ERCC4-ERCC1 complex;GO:0005654:nucleoplasm;GO:0000109:nucleotide-excision repair complex;GO:0000110:nucleotide-excision repair factor 1 complex;GO:0005694:chromosome;GO:0005829:cytosol;GO:0001650:fibrillar center;GO:0005739:mitochondrion;GO:0005730:nucleolus;GO:0005736:RNA polymerase I complex;GO:0000120:RNA polymerase I tran…	GO:0003684:damaged DNA binding;GO:0004519:endonuclease activity;GO:1990841:promoter-specific chromatin binding;GO:0008022:obsolete protein C-terminus binding;GO:0019904:protein domain specific binding;GO:0003697:single-stranded DNA binding;GO:0001094:TFIID-class transcription factor complex binding;GO:0003899:DNA-directed 5'-3' RNA polymerase activity;GO:0003723:RNA binding;	K10849	;ko01524 Platinum drug resistance;ko03420 Nucleotide excision repair;ko03460 Fanconi anemia pathway;
ENSG00000012124	6165	0	0	0	0	0	0	2	0.02	1	0.01	1	0.01	0	0	3	0.03	0	0	3	0.03	2	0.02	2	0.02	1	0.01	1	0.01	1	0.01	19	35319261	35347361	+	CD22	CD22 molecule [Source:HGNC Symbol%3BAcc:HGNC:1643]	GO:0042113:B cell activation;GO:0007155:cell adhesion;GO:0050859:negative regulation of B cell receptor signaling pathway;GO:0050849:negative regulation of calcium-mediated signaling;GO:0002638:negative regulation of immunoglobulin production;GO:0030888:regulation of B cell proliferation;GO:0030100:regulation of endocytosis;GO:0050776:regulation of immune response;	GO:0009986:cell surface;GO:0005737:cytoplasm;GO:0005769:early endosome;GO:0009897:external side of plasma membrane;GO:0070062:extracellular exosome;GO:0032809:neuronal cell body membrane;GO:0005886:plasma membrane;GO:0055037:recycling endosome;	GO:0030246:carbohydrate binding;GO:0042609:CD4 receptor binding;GO:0001791:IgM binding;GO:0019903:protein phosphatase binding;GO:0033691:sialic acid binding;GO:0005102:signaling receptor binding;	K06467	;ko04514 Cell adhesion molecules;ko04640 Hematopoietic cell lineage;ko04662 B cell receptor signaling pathway;
ENSG00000012171	5768	541	6.33	734	6.37	838	6.59	685	6.8	678	7.73	726	8.01	778	7.85	601	6.79	668	6.79	640	6.54	783	7.17	685	7.03	909	7.61	770	7.56	836	8.06	3	50267558	50277546	+	SEMA3B	semaphorin 3B [Source:HGNC Symbol%3BAcc:HGNC:10724]	GO:0007411:axon guidance;GO:0007267:cell-cell signaling;GO:0061643:chemorepulsion of axon;GO:0050919:negative chemotaxis;GO:0048843:negative regulation of axon extension involved in axon guidance;GO:0001755:neural crest cell migration;GO:0030335:positive regulation of cell migration;GO:0071526:semaphorin-plexin signaling pathway;	GO:0062023:collagen-containing extracellular matrix;GO:0005783:endoplasmic reticulum;GO:0005615:extracellular space;	GO:0045499:chemorepellent activity;GO:0030215:semaphorin receptor binding;	K06840	;ko04360 Axon guidance;
ENSG00000012174	8945	1389	10.48	1926	10.78	1913	9.7	1517	9.71	1459	10.73	1491	10.61	1500	9.76	1317	9.59	1464	9.59	1699	11.19	1780	10.52	1534	10.16	1768	9.55	1533	9.71	1659	10.32	X	21839617	21885423	+	MBTPS2	membrane bound transcription factor peptidase%2C site 2 [Source:HGNC Symbol%3BAcc:HGNC:15455]	GO:0036500:ATF6-mediated unfolded protein response;GO:0070977:bone maturation;GO:0008203:cholesterol metabolic process;GO:0030968:endoplasmic reticulum unfolded protein response;GO:0031293:membrane protein intracellular domain proteolysis;GO:0051091:positive regulation of DNA-binding transcription factor activity;GO:1990440:positive regulation of transcription from RNA polymerase II promoter in r…	GO:0005737:cytoplasm;GO:0000139:Golgi membrane;GO:0005634:nucleus;GO:0031519:PcG protein complex;GO:0005667:transcription regulator complex;	GO:0046872:metal ion binding;GO:0004222:metalloendopeptidase activity;GO:0000987:cis-regulatory region sequence-specific DNA binding;GO:0001228:DNA-binding transcription activator activity, RNA polymerase II-specific;GO:0000981:DNA-binding transcription factor activity, RNA polymerase II-specific;GO:0000978:RNA polymerase II cis-regulatory region sequence-specific DNA binding;GO:0043565:sequence-…	K07765	;ko04141 Protein processing in endoplasmic reticulum;
ENSG00000012211	3656	57	1.05	82	1.12	104	1.29	53	0.83	56	1.01	60	1.04	72	1.15	59	1.05	73	1.17	80	1.29	80	1.16	55	0.89	69	0.91	54	0.84	85	1.29	X	49174802	49186528	-	PRICKLE3	prickle planar cell polarity protein 3 [Source:HGNC Symbol%3BAcc:HGNC:6645]	GO:0030030:cell projection organization;	GO:0005739:mitochondrion;GO:0005886:plasma membrane;	GO:0008270:zinc ion binding;	K04511;K04372	;ko04310 Wnt signaling pathway;;ko04010 MAPK signaling pathway;ko04066 HIF-1 signaling pathway;ko04910 Insulin signaling pathway;
ENSG00000012223	3989	1	0.02	1	0.01	0	0	1	0.01	0	0	0	0	0	0	0	0	0	0	1	0.01	1	0.01	1	0.01	0	0	0	0	0	0	3	46435645	46485234	-	LTF	lactotransferrin [Source:HGNC Symbol%3BAcc:HGNC:6720]	GO:0019731:antibacterial humoral response;GO:0019732:antifungal humoral response;GO:0060349:bone morphogenesis;GO:0002227:innate immune response in mucosa;GO:0006811:monoatomic ion transport;GO:0055072:obsolete iron ion homeostasis;GO:0043066:negative regulation of apoptotic process;GO:0031665:negative regulation of lipopolysaccharide-mediated signaling pathway;GO:2001205:negative regulation of o…	GO:0005615:extracellular space;GO:0042581:specific granule;GO:0009986:cell surface;GO:0005737:cytoplasm;GO:0005769:early endosome;GO:0070062:extracellular exosome;GO:0005576:extracellular region;GO:0005634:nucleus;GO:0097013:phagocytic vesicle lumen;GO:0005886:plasma membrane;GO:0032991:protein-containing complex;GO:0055037:recycling endosome;GO:0030141:secretory granule;GO:0035580:specific granu…	GO:0005506:iron ion binding;GO:0004252:serine-type endopeptidase activity;GO:0004869:cysteine-type endopeptidase inhibitor activity;GO:0003677:DNA binding;GO:0008201:heparin binding;GO:0001530:lipopolysaccharide binding;GO:0043539:protein serine/threonine kinase activator activity;	K17283	-
ENSG00000012232	16477	694	2.84	847	2.57	947	2.61	831	2.89	752	3	732	2.83	863	3.05	789	3.12	786	2.8	672	2.4	822	2.64	648	2.33	1066	3.12	962	3.31	899	3.04	8	28600469	28756561	+	EXTL3	exostosin like glycosyltransferase 3 [Source:HGNC Symbol%3BAcc:HGNC:3518]	GO:0015012:heparan sulfate proteoglycan biosynthetic process;GO:0030307:positive regulation of cell growth;GO:0006486:protein glycosylation;	GO:0005783:endoplasmic reticulum;GO:0005789:endoplasmic reticulum membrane;GO:0005794:Golgi apparatus;GO:0005634:nucleus;	GO:0001888:glucuronyl-galactosyl-proteoglycan 4-alpha-N-acetylglucosaminyltransferase activity;GO:0016757:glycosyltransferase activity;GO:0046872:metal ion binding;GO:0003677:DNA binding;	K02370;K02927;K10087	;ko00534 Glycosaminoglycan biosynthesis - heparan sulfate / heparin;ko01100 Metabolic pathways;;ko03010 Ribosome;ko04120 Ubiquitin mediated proteolysis;ko04137 Mitophagy - animal;ko04140 Autophagy - animal;ko05012 Parkinson disease;ko05022 Pathways of neurodegeneration - multiple diseases;ko05131 Shigellosis;ko05167 Kaposi sarcoma-associated herpesvirus infection;ko05171 Coronavirus disease - COV…
ENSG00000012504	3628	0	0	0	0	1	0.01	1	0.02	0	0	1	0.02	0	0	0	0	0	0	0	0	0	0	0	0	0	0	2	0.03	0	0	12	100473708	100564414	+	NR1H4	nuclear receptor subfamily 1 group H member 4 [Source:HGNC Symbol%3BAcc:HGNC:7967]	GO:0038183:bile acid signaling pathway;GO:0030154:cell differentiation;GO:1903413:cellular response to bile acid;GO:0071398:cellular response to fatty acid;GO:0071417:cellular response to organonitrogen compound;GO:0035356:intracellular triglyceride homeostasis;GO:0034971:histone H3-R17 methylation;GO:0006954:inflammatory response;GO:0045087:innate immune response;GO:0038185:intracellular bile ac…	GO:0000785:chromatin;GO:0000791:euchromatin;GO:0005654:nucleoplasm;GO:0043235:receptor complex;GO:0005634:nucleus;	GO:0032052:bile acid binding;GO:0038181:bile acid receptor activity;GO:1902122:chenodeoxycholic acid binding;GO:0001228:DNA-binding transcription activator activity, RNA polymerase II-specific;GO:0003700:DNA-binding transcription factor activity;GO:0000981:DNA-binding transcription factor activity, RNA polymerase II-specific;GO:0004879:nuclear receptor activity;GO:0016922:nuclear receptor binding…	K08537	;ko04976 Bile secretion;
ENSG00000012660	3813	3906	69.15	5257	69.01	5869	69.79	4269	64.13	3938	67.92	4074	67.98	4231	64.57	3920	66.95	4396	67.55	4557	70.4	4877	67.6	4469	69.42	5659	71.68	4934	73.33	4910	71.65	6	53267398	53349179	-	ELOVL5	ELOVL fatty acid elongase 5 [Source:HGNC Symbol%3BAcc:HGNC:21308]	GO:0036109:alpha-linolenic acid metabolic process;GO:0034625:fatty acid elongation, monounsaturated fatty acid;GO:0034626:fatty acid elongation, polyunsaturated fatty acid;GO:0019367:fatty acid elongation, saturated fatty acid;GO:0043651:linoleic acid metabolic process;GO:0035338:long-chain fatty-acyl-CoA biosynthetic process;GO:0045723:positive regulation of fatty acid biosynthetic process;GO:00…	GO:0030425:dendrite;GO:0097447:dendritic tree;GO:0005783:endoplasmic reticulum;GO:0005789:endoplasmic reticulum membrane;GO:0030176:obsolete integral component of endoplasmic reticulum membrane;GO:0016020:membrane;GO:0043025:neuronal cell body;	GO:0102336:obsolete 3-oxo-arachidoyl-CoA synthase activity;GO:0102337:obsolete 3-oxo-cerotoyl-CoA synthase activity;GO:0102338:obsolete 3-oxo-lignoceronyl-CoA synthase activity;GO:0009922:fatty acid elongase activity;GO:0102756:obsolete very-long-chain 3-ketoacyl-CoA synthase activity;	K10244;K02910	;ko00062 Fatty acid elongation;ko01040 Biosynthesis of unsaturated fatty acids;ko01100 Metabolic pathways;ko01212 Fatty acid metabolism;;ko03010 Ribosome;ko05171 Coronavirus disease - COVID-19;
ENSG00000012779	3728	1	0.02	1	0.01	0	0	0	0	0	0	0	0	0	0	0	0	0	0	0	0	1	0.01	0	0	2	0.03	1	0.02	2	0.03	10	45374176	45446119	+	ALOX5	arachidonate 5-lipoxygenase [Source:HGNC Symbol%3BAcc:HGNC:435]	GO:0019369:arachidonic acid metabolic process;GO:0036336:dendritic cell migration;GO:0042593:glucose homeostasis;GO:0051122:hepoxilin biosynthetic process;GO:0006959:humoral immune response;GO:0002232:leukocyte chemotaxis involved in inflammatory response;GO:0002523:leukocyte migration involved in inflammatory response;GO:1901753:leukotriene A4 biosynthetic process;GO:0019370:leukotriene biosynth…	GO:0005829:cytosol;GO:0005576:extracellular region;GO:0005615:extracellular space;GO:1904813:ficolin-1-rich granule lumen;GO:0005635:nuclear envelope;GO:0005641:nuclear envelope lumen;GO:0016363:nuclear matrix;GO:0031965:nuclear membrane;GO:0005654:nucleoplasm;GO:0048471:perinuclear region of cytoplasm;GO:0034774:secretory granule lumen;	GO:0004052:arachidonate 12(S)-lipoxygenase activity;GO:0004051:arachidonate 5-lipoxygenase activity;GO:0036403:arachidonate 8(S)-lipoxygenase activity;GO:0016787:hydrolase activity;GO:0005506:iron ion binding;GO:0016702:oxidoreductase activity, acting on single donors with incorporation of molecular oxygen, incorporation of two atoms of oxygen;	K00461	;ko00590 Arachidonic acid metabolism;ko01100 Metabolic pathways;ko04148 Efferocytosis;ko04664 Fc epsilon RI signaling pathway;ko04726 Serotonergic synapse;ko04913 Ovarian steroidogenesis;ko05145 Toxoplasmosis;
ENSG00000012817	9463	0	0	0	0	0	0	0	0	0	0	0	0	0	0	0	0	0	0	0	0	0	0	0	0	0	0	0	0	0	0	Y	19703865	19744939	-	KDM5D	lysine demethylase 5D [Source:HGNC Symbol%3BAcc:HGNC:11115]	GO:0006338:chromatin remodeling;GO:0034720:histone H3-K4 demethylation;GO:0060765:regulation of androgen receptor signaling pathway;GO:0002457:T cell antigen processing and presentation;	GO:0001650:fibrillar center;GO:0005654:nucleoplasm;GO:0005634:nucleus;	GO:0050681:nuclear androgen receptor binding;GO:0051213:dioxygenase activity;GO:0003677:DNA binding;GO:0032452:histone demethylase activity;GO:0032453:histone H3K4 demethylase activity;GO:0034647:histone H3K4me/H3K4me2/H3K4me3 demethylase activity;GO:0046872:metal ion binding;	K11446	-
ENSG00000012822	8898	641	4.86	819	4.61	975	4.97	970	6.24	784	5.79	812	5.81	733	4.79	736	5.39	763	5.02	700	4.63	761	4.52	669	4.45	1008	5.47	912	5.81	899	5.62	12	53708517	53727745	-	CALCOCO1	calcium binding and coiled-coil domain 1 [Source:HGNC Symbol%3BAcc:HGNC:29306]	GO:0030518:intracellular steroid hormone receptor signaling pathway;GO:0010628:positive regulation of gene expression;GO:0045944:positive regulation of transcription by RNA polymerase II;GO:0045893:positive regulation of DNA-templated transcription;GO:0007165:signal transduction;GO:0016055:Wnt signaling pathway;	GO:0005829:cytosol;GO:0043231:intracellular membrane-bounded organelle;GO:0005634:nucleus;	GO:0070016:armadillo repeat domain binding;GO:0008013:beta-catenin binding;GO:0046872:metal ion binding;GO:0030374:nuclear receptor coactivator activity;GO:0008022:obsolete protein C-terminus binding;GO:0000978:RNA polymerase II cis-regulatory region sequence-specific DNA binding;GO:0043565:sequence-specific DNA binding;GO:0000976:transcription cis-regulatory region binding;GO:0003713:transcripti…	K04135	;ko04020 Calcium signaling pathway;ko04022 cGMP-PKG signaling pathway;ko04080 Neuroactive ligand-receptor interaction;ko04152 AMPK signaling pathway;ko04261 Adrenergic signaling in cardiomyocytes;ko04270 Vascular smooth muscle contraction;ko04970 Salivary secretion;
ENSG00000012963	3509	1219	23.45	1619	23.1	1750	22.61	1422	23.21	1247	23.37	1351	24.5	1338	22.19	1238	22.98	1351	22.56	1284	21.56	1597	24.05	1412	23.83	1837	25.29	1674	27.03	1631	25.86	14	93207241	93229215	+	UBR7	ubiquitin protein ligase E3 component n-recognin 7 [Source:HGNC Symbol%3BAcc:HGNC:20344]	-	GO:0005737:cytoplasm;	GO:0061630:ubiquitin protein ligase activity;GO:0008270:zinc ion binding;	K11979	-
ENSG00000012983	7580	2328	20.73	3205	21.17	3580	21.41	2741	20.71	2466	21.39	2714	22.78	3002	23.04	2805	24.1	2818	21.78	3121	24.25	2923	20.38	2786	21.77	3756	23.93	2877	21.51	2828	20.76	14	50418501	50561126	-	MAP4K5	mitogen-activated protein kinase kinase kinase kinase 5 [Source:HGNC Symbol%3BAcc:HGNC:6867]	GO:0007257:obsolete activation of JUN kinase activity;GO:0035556:intracellular signal transduction;GO:0006468:protein phosphorylation;	GO:0005737:cytoplasm;	GO:0005524:ATP binding;GO:0008349:MAP kinase kinase kinase kinase activity;GO:0004672:protein kinase activity;GO:0106310:protein serine kinase activity;GO:0004674:protein serine/threonine kinase activity;	K08833	-
ENSG00000013016	4825	38	0.53	34	0.35	44	0.41	48	0.57	21	0.29	38	0.5	29	0.35	19	0.26	40	0.49	26	0.32	28	0.31	37	0.45	28	0.28	47	0.55	40	0.46	2	31234152	31269451	+	EHD3	EH domain containing 3 [Source:HGNC Symbol%3BAcc:HGNC:3244]	GO:0060271:cilium assembly;GO:0034498:early endosome to Golgi transport;GO:0032456:endocytic recycling;GO:0006897:endocytosis;GO:0016197:endosomal transport;GO:0090160:Golgi to lysosome transport;GO:1901387:positive regulation of voltage-gated calcium channel activity;GO:0051260:protein homooligomerization;GO:0072659:protein localization to plasma membrane;GO:0015031:protein transport;GO:0001881:…	GO:0020018:ciliary pocket membrane;GO:0005737:cytoplasm;GO:0005829:cytosol;GO:0005769:early endosome;GO:0030139:endocytic vesicle;GO:0010008:endosome membrane;GO:0005925:focal adhesion;GO:0043231:intracellular membrane-bounded organelle;GO:0005634:nucleus;GO:0048471:perinuclear region of cytoplasm;GO:0055038:recycling endosome membrane;	GO:0005524:ATP binding;GO:0005509:calcium ion binding;GO:0005525:GTP binding;GO:0003676:nucleic acid binding;	K12476	;ko04144 Endocytosis;
ENSG00000013275	2550	1091	28.88	1502	29.49	1784	31.72	1375	30.88	1083	27.93	1203	30.02	1328	30.3	1159	29.6	1341	30.81	1314	30.35	1507	31.24	1306	30.34	1430	27.09	1254	27.87	1234	26.93	19	39971165	39981764	+	PSMC4	proteasome 26S subunit%2C ATPase 4 [Source:HGNC Symbol%3BAcc:HGNC:9551]	GO:0001824:blastocyst development;GO:0045899:positive regulation of RNA polymerase II transcription preinitiation complex assembly;GO:0030163:protein catabolic process;GO:0006508:proteolysis;	GO:0005829:cytosol;GO:0031597:cytosolic proteasome complex;GO:0016234:inclusion body;GO:0016020:membrane;GO:0005654:nucleoplasm;GO:0005634:nucleus;GO:0022624:proteasome accessory complex;GO:0000502:proteasome complex;GO:0008540:proteasome regulatory particle, base subcomplex;GO:0045202:synapse;	GO:0005524:ATP binding;GO:0016887:ATP hydrolysis activity;GO:0036402:proteasome-activating activity;	K03063	;ko03050 Proteasome;ko05010 Alzheimer disease;ko05012 Parkinson disease;ko05014 Amyotrophic lateral sclerosis;ko05016 Huntington disease;ko05017 Spinocerebellar ataxia;ko05020 Prion disease;ko05022 Pathways of neurodegeneration - multiple diseases;ko05169 Epstein-Barr virus infection;
ENSG00000013288	8884	394	2.99	486	2.74	537	2.74	427	2.75	364	2.69	420	3.01	428	2.8	421	3.09	413	2.72	388	2.57	487	2.9	417	2.78	582	3.16	477	3.04	498	3.12	4	6575189	6623362	+	MAN2B2	mannosidase alpha class 2B member 2 [Source:HGNC Symbol%3BAcc:HGNC:29623]	GO:0006013:mannose metabolic process;	GO:0070062:extracellular exosome;GO:0043202:lysosomal lumen;GO:0005764:lysosome;GO:0005774:vacuolar membrane;	GO:0004559:alpha-mannosidase activity;GO:0030246:carbohydrate binding;GO:0046872:metal ion binding;	K12312	;ko00511 Other glycan degradation;
ENSG00000013293	10496	0	0	0	0	0	0	0	0	0	0	0	0	0	0	1	0.01	0	0	0	0	0	0	0	0	0	0	0	0	0	0	3	170459548	170586075	-	SLC7A14	solute carrier family 7 member 14 [Source:HGNC Symbol%3BAcc:HGNC:29326]	GO:0006865:amino acid transport;	GO:0005829:cytosol;GO:0043231:intracellular membrane-bounded organelle;GO:0005765:lysosomal membrane;GO:0005654:nucleoplasm;GO:0005886:plasma membrane;	GO:0015171:amino acid transmembrane transporter activity;	K13871	-
ENSG00000013297	4321	26	0.41	29	0.34	21	0.22	24	0.32	28	0.43	25	0.37	30	0.4	28	0.42	18	0.24	16	0.22	30	0.37	36	0.49	30	0.34	24	0.31	24	0.31	3	170418868	170454733	+	CLDN11	claudin 11 [Source:HGNC Symbol%3BAcc:HGNC:8514]	GO:0008366:axon ensheathment;GO:0070830:bicellular tight junction assembly;GO:0016338:calcium-independent cell-cell adhesion via plasma membrane cell-adhesion molecules;GO:0007155:cell adhesion;GO:0007283:spermatogenesis;GO:0120192:tight junction assembly;	GO:0030424:axon;GO:0045178:basal part of cell;GO:0005923:bicellular tight junction;GO:0030054:cell junction;GO:0005811:lipid droplet;GO:0005883:neurofilament;GO:0005886:plasma membrane;GO:0070160:tight junction;	GO:0042802:identical protein binding;GO:0005198:structural molecule activity;	K06087	;ko04514 Cell adhesion molecules;ko04530 Tight junction;ko04670 Leukocyte transendothelial migration;ko05130 Pathogenic Escherichia coli infection;ko05160 Hepatitis C;
ENSG00000013306	3526	713	13.65	1012	14.37	1201	15.44	719	11.68	732	13.65	816	14.72	914	15.08	794	14.66	881	14.64	852	14.23	989	14.83	896	15.05	1067	14.62	843	13.55	1051	16.59	17	44319625	44324870	-	SLC25A39	solute carrier family 25 member 39 [Source:HGNC Symbol%3BAcc:HGNC:24279]	GO:0006783:heme biosynthetic process;	GO:0005743:mitochondrial inner membrane;	-	K15119	-
ENSG00000013364	6141	973	10.7	1346	10.97	1520	11.22	1315	12.26	1140	12.21	1213	12.57	1060	10.04	961	10.19	1035	9.88	1136	10.9	1165	10.03	1139	10.99	1218	9.58	1037	9.57	1062	9.62	16	29820394	29848039	+	MVP	major vault protein [Source:HGNC Symbol%3BAcc:HGNC:7531]	GO:0038127:ERBB signaling pathway;GO:0051028:mRNA transport;GO:0042059:negative regulation of epidermal growth factor receptor signaling pathway;GO:0031953:negative regulation of protein autophosphorylation;GO:0061099:negative regulation of protein tyrosine kinase activity;GO:0015031:protein transport;	GO:0005737:cytoplasm;GO:0005856:cytoskeleton;GO:0005829:cytosol;GO:0070062:extracellular exosome;GO:0005576:extracellular region;GO:1904813:ficolin-1-rich granule lumen;GO:0016020:membrane;GO:0005643:nuclear pore;GO:0005634:nucleus;GO:0048471:perinuclear region of cytoplasm;GO:0034774:secretory granule lumen;	GO:0042802:identical protein binding;GO:0019901:protein kinase binding;GO:0019903:protein phosphatase binding;	K17266	-
ENSG00000013374	5338	940	11.89	1340	12.57	1489	12.65	1302	13.97	1067	13.14	1109	13.22	1136	12.38	988	12.05	1026	11.26	1030	11.37	1198	11.86	1049	11.64	1429	12.93	1279	13.58	1181	12.31	7	151341772	151378449	+	NUB1	negative regulator of ubiquitin like proteins 1 [Source:HGNC Symbol%3BAcc:HGNC:17623]	GO:0032436:positive regulation of proteasomal ubiquitin-dependent protein catabolic process;GO:0016567:protein ubiquitination;GO:2000058:regulation of ubiquitin-dependent protein catabolic process;GO:0034341:response to type II interferon;GO:0034612:response to tumor necrosis factor;GO:0006511:ubiquitin-dependent protein catabolic process;	GO:0005829:cytosol;GO:0005730:nucleolus;GO:0005654:nucleoplasm;	-	K08898;K16467	-
ENSG00000013375	22007	1031	3.16	1358	3.09	1528	3.15	1283	3.34	1102	3.29	1229	3.55	1200	3.17	1106	3.27	1127	3	1192	3.19	1232	2.96	1153	3.1	1558	3.42	1258	3.24	1200	3.03	6	83147324	83193936	-	PGM3	phosphoglucomutase 3 [Source:HGNC Symbol%3BAcc:HGNC:8907]	GO:0005975:carbohydrate metabolic process;GO:0006041:glucosamine metabolic process;GO:0019255:glucose 1-phosphate metabolic process;GO:0030097:hemopoiesis;GO:0006487:protein N-linked glycosylation;GO:0006493:protein O-linked glycosylation;GO:0007283:spermatogenesis;GO:0006048:UDP-N-acetylglucosamine biosynthetic process;	GO:0005829:cytosol;	GO:0000287:magnesium ion binding;GO:0004610:phosphoacetylglucosamine mutase activity;GO:0004614:phosphoglucomutase activity;	K01836;K11433	;ko00520 Amino sugar and nucleotide sugar metabolism;ko01100 Metabolic pathways;ko01250 Biosynthesis of nucleotide sugars;;ko00310 Lysine degradation;ko01100 Metabolic pathways;
ENSG00000013392	3769	83	1.49	131	1.74	156	1.88	165	2.51	108	1.88	96	1.62	102	1.57	72	1.24	95	1.48	127	1.98	89	1.25	99	1.56	155	1.99	131	1.97	131	1.93	6	83193357	83198935	+	RWDD2A	RWD domain containing 2A [Source:HGNC Symbol%3BAcc:HGNC:21385]	-	-	-	K11447	;ko05202 Transcriptional misregulation in cancer;
ENSG00000013441	5117	1445	19.06	1872	18.31	1927	17.08	1791	20.05	1459	18.75	1704	21.19	1714	19.49	1546	19.68	1737	19.89	1662	19.13	1792	18.51	1605	18.58	1989	18.77	1691	18.73	1661	18.06	2	200853009	200864691	-	CLK1	CDC like kinase 1 [Source:HGNC Symbol%3BAcc:HGNC:2068]	GO:0018105:peptidyl-serine phosphorylation;GO:0018107:peptidyl-threonine phosphorylation;GO:0018108:peptidyl-tyrosine phosphorylation;GO:0046777:protein autophosphorylation;GO:0043484:regulation of RNA splicing;	GO:0005737:cytoplasm;GO:0005634:nucleus;	GO:0005524:ATP binding;GO:0106310:protein serine kinase activity;GO:0004674:protein serine/threonine kinase activity;GO:0004712:protein serine/threonine/tyrosine kinase activity;GO:0004713:protein tyrosine kinase activity;GO:0004714:transmembrane receptor protein tyrosine kinase activity;GO:0004715:non-membrane spanning protein tyrosine kinase activity;	K08823	-
ENSG00000013503	4768	393	5.56	600	6.3	644	6.12	458	5.5	433	5.97	371	4.95	424	5.17	431	5.89	396	4.87	452	5.58	534	5.92	472	5.86	523	5.3	457	5.43	421	4.91	12	106357748	106510198	+	POLR3B	RNA polymerase III subunit B [Source:HGNC Symbol%3BAcc:HGNC:30348]	GO:0051607:defense response to virus;GO:0045087:innate immune response;GO:0045089:positive regulation of innate immune response;GO:0032728:positive regulation of interferon-beta production;GO:0006351:DNA-templated transcription;	GO:0005829:cytosol;GO:0005654:nucleoplasm;GO:0005666:RNA polymerase III complex;	GO:0003677:DNA binding;GO:0003899:DNA-directed 5'-3' RNA polymerase activity;GO:0046872:metal ion binding;GO:0032549:ribonucleoside binding;	K03021	;ko03020 RNA polymerase;ko04623 Cytosolic DNA-sensing pathway;
ENSG00000013523	6525	144	1.49	245	1.88	246	1.71	207	1.82	153	1.54	169	1.65	175	1.56	190	1.9	178	1.6	196	1.77	251	2.03	215	1.95	268	1.98	232	2.01	228	1.94	14	76786009	76826246	-	ANGEL1	angel homolog 1 [Source:HGNC Symbol%3BAcc:HGNC:19961]	-	GO:0005801:cis-Golgi network;GO:0005829:cytosol;GO:0005783:endoplasmic reticulum;GO:0005634:nucleus;GO:0048471:perinuclear region of cytoplasm;	GO:0000175:3'-5'-RNA exonuclease activity;GO:0008190:eukaryotic initiation factor 4E binding;GO:0019904:protein domain specific binding;	K18729	-
ENSG00000013561	4988	474	6.41	704	7.07	776	7.05	566	6.5	545	7.19	508	6.48	608	7.09	510	6.66	529	6.21	592	6.99	640	6.78	582	6.91	779	7.54	587	6.67	565	6.3	5	141958328	141990292	+	RNF14	ring finger protein 14 [Source:HGNC Symbol%3BAcc:HGNC:10058]	GO:0030521:androgen receptor signaling pathway;GO:0032436:positive regulation of proteasomal ubiquitin-dependent protein catabolic process;GO:0045893:positive regulation of DNA-templated transcription;GO:0000209:protein polyubiquitination;GO:0016567:protein ubiquitination;GO:0060765:regulation of androgen receptor signaling pathway;GO:0006357:regulation of transcription by RNA polymerase II;GO:00…	GO:0005737:cytoplasm;GO:0005829:cytosol;GO:0005654:nucleoplasm;GO:0005634:nucleus;GO:0000151:ubiquitin ligase complex;	GO:0050681:nuclear androgen receptor binding;GO:0046872:metal ion binding;GO:0003713:transcription coactivator activity;GO:0031624:ubiquitin conjugating enzyme binding;GO:0061630:ubiquitin protein ligase activity;GO:0019787:ubiquitin-like protein transferase activity;	K11971	-
ENSG00000013563	4132	206	3.37	318	3.85	347	3.81	310	4.3	272	4.33	255	3.93	280	3.94	290	4.57	279	3.96	251	3.58	363	4.64	266	3.81	355	4.15	350	4.8	324	4.36	X	154401236	154412112	-	DNASE1L1	deoxyribonuclease 1 like 1 [Source:HGNC Symbol%3BAcc:HGNC:2957]	GO:0006308:DNA catabolic process;GO:0000737:obsolete DNA catabolic process, endonucleolytic;GO:0006259:DNA metabolic process;	GO:0005783:endoplasmic reticulum;GO:0005576:extracellular region;GO:0005634:nucleus;GO:0035580:specific granule lumen;	GO:0004536:DNA nuclease activity;GO:0004530:deoxyribonuclease I activity;GO:0003677:DNA binding;	K11995;K13511	-;ko00564 Glycerophospholipid metabolism;
ENSG00000013573	8367	1191	9.61	1595	9.54	1842	9.98	1419	9.71	1147	9.01	1423	10.82	1369	9.52	1249	9.72	1408	9.86	1352	9.52	1513	9.56	1408	9.97	1766	10.19	1556	10.54	1662	11.05	12	31073860	31104799	+	DDX11	DEAD/H-box helicase 11 [Source:HGNC Symbol%3BAcc:HGNC:2736]	GO:0032508:DNA duplex unwinding;GO:0034085:establishment of sister chromatid cohesion;GO:0006139:nucleobase-containing compound metabolic process;GO:1904976:cellular response to bleomycin;GO:0072719:cellular response to cisplatin;GO:0006974:DNA damage response;GO:0072711:cellular response to hydroxyurea;GO:0006281:DNA repair;GO:0044806:G-quadruplex DNA unwinding;GO:0032091:negative regulation of …	GO:0005634:nucleus;GO:0005730:nucleolus;GO:0005813:centrosome;GO:0000785:chromatin;GO:0005737:cytoplasm;GO:0070062:extracellular exosome;GO:0001650:fibrillar center;GO:0030496:midbody;GO:0005654:nucleoplasm;GO:0000922:spindle pole;	GO:0005524:ATP binding;GO:0140603:obsolete ATP hydrolysis activity;GO:0003677:DNA binding;GO:0003678:DNA helicase activity;GO:0003723:RNA binding;GO:0003724:RNA helicase activity;GO:0051539:4 iron, 4 sulfur cluster binding;GO:0043139:5'-3' DNA helicase activity;GO:0008094:ATP-dependent activity, acting on DNA;GO:0008186:ATP-dependent activity, acting on RNA;GO:0003682:chromatin binding;GO:0003688…	K11273	;ko04110 Cell cycle;
ENSG00000013583	3428	408	8.03	506	7.39	521	6.89	359	6	291	5.58	335	6.22	474	8.05	386	7.33	404	6.91	349	6	440	6.78	401	6.93	520	7.33	468	7.74	454	7.37	12	12974870	13000265	-	HEBP1	heme binding protein 1 [Source:HGNC Symbol%3BAcc:HGNC:17176]	GO:0007623:circadian rhythm;	GO:0005737:cytoplasm;GO:0070062:extracellular exosome;GO:0005576:extracellular region;	GO:0020037:heme binding;	K09488	;ko05012 Parkinson disease;ko05022 Pathways of neurodegeneration - multiple diseases;
ENSG00000013588	7663	4403	38.79	5854	38.24	6916	40.92	5532	41.35	4587	39.36	5073	42.12	5749	43.65	5175	43.98	6215	47.52	5655	43.47	6474	44.65	5578	43.11	4889	30.82	4016	29.7	4236	30.76	12	12891559	12917937	+	GPRC5A	G protein-coupled receptor class C group 5 member A [Source:HGNC Symbol%3BAcc:HGNC:9836]	GO:0007175:negative regulation of epidermal growth factor-activated receptor activity;GO:0007165:signal transduction;	GO:0030659:cytoplasmic vesicle membrane;GO:0070062:extracellular exosome;GO:0043231:intracellular membrane-bounded organelle;GO:0005730:nucleolus;GO:0005886:plasma membrane;GO:0043235:receptor complex;GO:0031982:vesicle;	GO:0045296:cadherin binding;GO:0004930:G protein-coupled receptor activity;GO:0030295:protein kinase activator activity;	K08468	-
ENSG00000013619	6664	113	1.14	132	0.99	184	1.25	115	0.99	103	1.02	143	1.37	145	1.27	112	1.09	126	1.11	121	1.07	167	1.32	139	1.24	214	1.55	167	1.42	180	1.5	X	150361422	150514178	+	MAMLD1	mastermind like domain containing 1 [Source:HGNC Symbol%3BAcc:HGNC:2568]	GO:0008584:male gonad development;GO:0006357:regulation of transcription by RNA polymerase II;	GO:0005813:centrosome;GO:0005794:Golgi apparatus;GO:0016604:nuclear body;GO:0005654:nucleoplasm;	-	K19512	-
ENSG00000013725	5958	0	0	0	0	1	0.01	0	0	0	0	0	0	0	0	0	0	0	0	0	0	0	0	0	0	0	0	0	0	2	0.02	11	60971680	61020377	+	CD6	CD6 molecule [Source:HGNC Symbol%3BAcc:HGNC:1691]	GO:0002438:acute inflammatory response to antigenic stimulus;GO:0002250:adaptive immune response;GO:0007157:heterophilic cell-cell adhesion via plasma membrane cell adhesion molecules;GO:0001771:immunological synapse formation;GO:0045087:innate immune response;GO:0031663:lipopolysaccharide-mediated signaling pathway;GO:1900017:positive regulation of cytokine production involved in inflammatory re…	GO:0009897:external side of plasma membrane;GO:0005576:extracellular region;GO:0001772:immunological synapse;GO:0031226:obsolete intrinsic component of plasma membrane;	GO:0042802:identical protein binding;GO:0001530:lipopolysaccharide binding;GO:0070891:lipoteichoic acid binding;GO:0005044:scavenger receptor activity;	K06456	;ko04514 Cell adhesion molecules;
ENSG00000013810	8825	1681	12.86	2114	11.99	2341	12.03	1581	10.26	1502	11.19	1535	11.07	1885	12.43	1672	12.34	1948	12.93	1583	10.57	1922	11.51	1704	11.44	2313	12.66	1963	12.6	2011	12.68	4	1712858	1745171	+	TACC3	transforming acidic coiled-coil containing protein 3 [Source:HGNC Symbol%3BAcc:HGNC:11524]	GO:0051301:cell division;GO:0008283:cell population proliferation;GO:0021987:cerebral cortex development;GO:0007091:metaphase/anaphase transition of mitotic cell cycle;GO:0000226:microtubule cytoskeleton organization;GO:1902850:microtubule cytoskeleton organization involved in mitosis;GO:0007052:mitotic spindle organization;GO:0060236:regulation of mitotic spindle organization;	GO:0034451:centriolar satellite;GO:0005737:cytoplasm;GO:0005829:cytosol;GO:0043231:intracellular membrane-bounded organelle;GO:0072686:mitotic spindle;GO:0000922:spindle pole;	-	K14283	-
ENSG00000014123	4539	524	7.79	880	9.7	854	8.53	596	7.52	528	7.65	601	8.42	614	7.87	615	8.82	603	7.78	629	8.16	702	8.17	568	7.41	764	8.13	722	9.01	724	8.88	6	96521595	96555276	+	UFL1	UFM1 specific ligase 1 [Source:HGNC Symbol%3BAcc:HGNC:23039]	GO:0006974:DNA damage response;GO:0006281:DNA repair;GO:0030218:erythrocyte differentiation;GO:0060218:hematopoietic stem cell differentiation;GO:0016570:histone modification;GO:0043066:negative regulation of apoptotic process;GO:1903895:negative regulation of IRE1-mediated unfolded protein response;GO:0032088:negative regulation of NF-kappaB transcription factor activity;GO:0031397:negative regu…	GO:0005737:cytoplasm;GO:0005829:cytosol;GO:0005783:endoplasmic reticulum;GO:0005789:endoplasmic reticulum membrane;GO:0016020:membrane;GO:0043005:neuron projection;GO:0005634:nucleus;GO:0032991:protein-containing complex;GO:0035861:site of double-strand break;	GO:0019901:protein kinase binding;GO:0061666:UFM1 ligase activity;GO:0071568:UFM1 transferase activity;	-	-
ENSG00000014138	5568	189	2.29	249	2.24	279	2.27	255	2.62	222	2.62	209	2.39	254	2.65	234	2.74	229	2.41	192	2.03	247	2.34	223	2.37	298	2.59	222	2.26	270	2.7	11	65261920	65305589	+	POLA2	DNA polymerase alpha 2%2C accessory subunit [Source:HGNC Symbol%3BAcc:HGNC:30073]	GO:0006260:DNA replication;GO:0006270:DNA replication initiation;GO:0006269:DNA replication, synthesis of RNA primer;	GO:0005658:alpha DNA polymerase:primase complex;GO:0005829:cytosol;GO:0005654:nucleoplasm;	GO:0003677:DNA binding;	K02321	;ko03030 DNA replication;
ENSG00000014164	3721	189	3.43	265	3.56	336	4.09	202	3.11	238	4.21	204	3.49	206	3.22	194	3.4	213	3.35	239	3.78	255	3.62	251	4	238	3.09	218	3.32	222	3.32	8	143437659	143541447	-	ZC3H3	zinc finger CCCH-type containing 3 [Source:HGNC Symbol%3BAcc:HGNC:28972]	GO:0031124:mRNA 3'-end processing;GO:0051028:mRNA transport;GO:0032927:positive regulation of activin receptor signaling pathway;GO:1900363:obsolete regulation of mRNA polyadenylation;	GO:0005847:mRNA cleavage and polyadenylation specificity factor complex;GO:0005634:nucleus;	GO:0003677:DNA binding;GO:0046872:metal ion binding;GO:0070412:R-SMAD binding;	-	-
ENSG00000014216	7506	1016	9.14	1390	9.27	1610	9.73	1280	9.77	1151	10.08	1258	10.66	1215	9.42	1068	9.27	1237	9.66	1267	9.94	1391	9.79	1168	9.22	1446	9.3	1251	9.44	1209	8.96	11	65180566	65212006	+	CAPN1	calpain 1 [Source:HGNC Symbol%3BAcc:HGNC:1476]	GO:0006508:proteolysis;GO:0050790:regulation of catalytic activity;GO:0097264:self proteolysis;GO:0060056:mammary gland involution;GO:0008284:positive regulation of cell population proliferation;GO:0032801:receptor catabolic process;GO:0016241:regulation of macroautophagy;GO:2000310:regulation of NMDA receptor activity;	GO:0005737:cytoplasm;GO:0005829:cytosol;GO:0005886:plasma membrane;GO:0070062:extracellular exosome;GO:0005576:extracellular region;GO:1904813:ficolin-1-rich granule lumen;GO:0005925:focal adhesion;GO:0005764:lysosome;GO:0016020:membrane;GO:0005739:mitochondrion;	GO:0005509:calcium ion binding;GO:0004198:calcium-dependent cysteine-type endopeptidase activity;GO:0008233:peptidase activity;	K01367	;ko04141 Protein processing in endoplasmic reticulum;ko04210 Apoptosis;ko04217 Necroptosis;ko04218 Cellular senescence;ko05010 Alzheimer disease;ko05022 Pathways of neurodegeneration - multiple diseases;ko05131 Shigellosis;
ENSG00000014257	4280	3	0.05	3	0.04	3	0.03	1	0.01	2	0.03	4	0.06	2	0.03	1	0.02	2	0.03	6	0.08	7	0.09	2	0.03	3	0.03	4	0.05	3	0.04	3	132317369	132368298	+	ACP3	acid phosphatase 3 [Source:HGNC Symbol%3BAcc:HGNC:125]	GO:0046085:adenosine metabolic process;GO:0016311:dephosphorylation;GO:0007040:lysosome organization;GO:0009117:nucleotide metabolic process;GO:0060168:positive regulation of adenosine receptor signaling pathway;GO:0006144:purine nucleobase metabolic process;GO:0051930:regulation of sensory perception of pain;GO:0006772:thiamine metabolic process;	GO:0035577:azurophil granule membrane;GO:0005829:cytosol;GO:0070062:extracellular exosome;GO:0005615:extracellular space;GO:0030175:filopodium;GO:0005765:lysosomal membrane;GO:0005764:lysosome;GO:0005634:nucleus;GO:0005886:plasma membrane;GO:0012506:vesicle membrane;	GO:0008253:5'-nucleotidase activity;GO:0003993:acid phosphatase activity;GO:0042802:identical protein binding;GO:0052642:lysophosphatidic acid phosphatase activity;GO:0016791:phosphatase activity;GO:0042803:protein homodimerization activity;GO:0004725:protein tyrosine phosphatase activity;GO:0042131:thiamine phosphate phosphatase activity;	K19283	-
ENSG00000014641	4990	3133	42.38	4164	41.77	4708	42.78	3441	39.5	3122	41.14	3132	39.94	3350	39.06	2975	38.83	3315	38.93	3373	39.82	3696	39.15	3336	39.6	4185	40.51	3743	42.51	3932	43.84	2	63588609	63607197	+	MDH1	malate dehydrogenase 1 [Source:HGNC Symbol%3BAcc:HGNC:6970]	GO:0005975:carbohydrate metabolic process;GO:0006108:malate metabolic process;GO:0006734:NADH metabolic process;GO:0006107:oxaloacetate metabolic process;GO:0006099:tricarboxylic acid cycle;GO:0019674:NAD metabolic process;	GO:0005813:centrosome;GO:0005829:cytosol;GO:0070062:extracellular exosome;GO:0005615:extracellular space;GO:0005739:mitochondrion;GO:0043209:myelin sheath;	GO:0030060:L-malate dehydrogenase activity;GO:0047860:diiodophenylpyruvate reductase activity;GO:0004470:malic enzyme activity;GO:0051287:NAD binding;GO:0016615:malate dehydrogenase activity;	K00025	;ko00020 Citrate cycle (TCA cycle);ko00270 Cysteine and methionine metabolism;ko00620 Pyruvate metabolism;ko00630 Glyoxylate and dicarboxylate metabolism;ko01100 Metabolic pathways;ko01200 Carbon metabolism;ko04964 Proximal tubule bicarbonate reclamation;
ENSG00000014824	7199	2017	18.91	2561	17.81	2744	17.28	2068	16.45	1894	17.3	1949	17.23	2164	17.49	1881	17.02	2102	17.11	2299	18.81	2239	16.44	2120	17.44	2781	18.66	2292	18.04	2354	18.19	4	41990502	42090461	+	SLC30A9	solute carrier family 30 member 9 [Source:HGNC Symbol%3BAcc:HGNC:1329]	GO:0006882:intracellular zinc ion homeostasis;GO:0006289:nucleotide-excision repair;GO:0045944:positive regulation of transcription by RNA polymerase II;GO:0006829:zinc ion transport;	GO:0031410:cytoplasmic vesicle;GO:0005856:cytoskeleton;GO:0005783:endoplasmic reticulum;GO:0005634:nucleus;	GO:0008324:monoatomic cation transmembrane transporter activity;GO:0003682:chromatin binding;GO:0016922:nuclear receptor binding;GO:0030374:nuclear receptor coactivator activity;	K14696	-
ENSG00000014914	4572	101	1.49	130	1.42	129	1.28	105	1.32	95	1.37	89	1.24	115	1.46	73	1.04	92	1.18	93	1.2	104	1.2	77	1	142	1.5	128	1.59	136	1.66	1	149928651	149936879	-	MTMR11	myotubularin related protein 11 [Source:HGNC Symbol%3BAcc:HGNC:24307]	GO:0046856:phosphatidylinositol dephosphorylation;	GO:0005737:cytoplasm;GO:0070062:extracellular exosome;	GO:0004438:phosphatidylinositol-3-phosphate phosphatase activity;	K18085	-
ENSG00000014919	5215	1083	14.02	1515	14.54	1559	13.55	1265	13.89	1105	13.93	1092	13.32	1188	13.26	1165	14.55	1191	13.38	1224	13.83	1451	14.71	1180	13.4	1554	14.39	1355	14.72	1277	13.63	10	99710868	99732127	-	COX15	cytochrome c oxidase assembly homolog COX15 [Source:HGNC Symbol%3BAcc:HGNC:2263]	GO:0045333:cellular respiration;GO:0006784:heme A biosynthetic process;GO:0006783:heme biosynthetic process;GO:0006123:mitochondrial electron transport, cytochrome c to oxygen;GO:1902600:proton transmembrane transport;GO:0008535:respiratory chain complex IV assembly;GO:0007585:respiratory gaseous exchange by respiratory system;	GO:0070069:cytochrome complex;GO:0005743:mitochondrial inner membrane;GO:0005746:mitochondrial respirasome;GO:0005739:mitochondrion;GO:0005654:nucleoplasm;	GO:0004129:cytochrome-c oxidase activity;GO:0020037:heme binding;GO:0060090:molecular adaptor activity;GO:0016653:oxidoreductase activity, acting on NAD(P)H, heme protein as acceptor;GO:0016627:oxidoreductase activity, acting on the CH-CH group of donors;	K02259	;ko00190 Oxidative phosphorylation;ko00860 Porphyrin metabolism;ko01100 Metabolic pathways;ko01240 Biosynthesis of cofactors;ko04714 Thermogenesis;
ENSG00000015133	12426	196	1.06	258	1.04	247	0.9	175	0.81	197	1.04	185	0.95	203	0.95	185	0.97	228	1.08	219	1.04	203	0.86	179	0.85	252	0.98	238	1.09	231	1.03	14	91271323	91417844	-	CCDC88C	coiled-coil domain containing 88C [Source:HGNC Symbol%3BAcc:HGNC:19967]	GO:0003383:apical constriction;GO:0031122:cytoplasmic microtubule organization;GO:0030705:cytoskeleton-dependent intracellular transport;GO:0090090:negative regulation of canonical Wnt signaling pathway;GO:0035567:non-canonical Wnt signaling pathway;GO:0031648:protein destabilization;GO:0001932:regulation of protein phosphorylation;GO:0007264:small GTPase mediated signal transduction;GO:0031098:s…	GO:0030054:cell junction;GO:0005813:centrosome;GO:0005737:cytoplasm;	GO:0051959:dynein light intermediate chain binding;GO:0005109:frizzled binding;GO:0001965:G-protein alpha-subunit binding;GO:0005085:guanyl-nucleotide exchange factor activity;GO:0042802:identical protein binding;GO:0008017:microtubule binding;GO:0030165:PDZ domain binding;GO:0043621:protein self-association;	K11279;K08834	-;ko04745 Phototransduction - fly;ko04814 Motor proteins;
ENSG00000015153	10839	324	2.02	472	2.18	402	1.68	381	2.01	322	1.95	331	1.94	391	2.1	336	2.02	388	2.1	489	2.66	448	2.18	319	1.74	495	2.21	368	1.92	336	1.72	12	42157104	42238349	-	YAF2	YY1 associated factor 2 [Source:HGNC Symbol%3BAcc:HGNC:17363]	GO:0045892:negative regulation of DNA-templated transcription;GO:0045893:positive regulation of DNA-templated transcription;GO:0006355:regulation of DNA-templated transcription;	GO:0005829:cytosol;GO:0005654:nucleoplasm;GO:0005634:nucleus;	GO:0003677:DNA binding;GO:0046872:metal ion binding;GO:0003713:transcription coactivator activity;GO:0003712:transcription coregulator activity;GO:0003714:transcription corepressor activity;	K11468	;ko03083 Polycomb repressive complex;
ENSG00000015171	5325	1371	17.38	1904	17.9	2019	17.19	1589	17.09	1449	17.89	1475	17.62	1616	17.66	1462	17.88	1566	17.23	1739	19.24	1687	16.74	1486	16.53	2139	19.4	1878	19.99	1773	18.53	10	134465	254637	+	ZMYND11	zinc finger MYND-type containing 11 [Source:HGNC Symbol%3BAcc:HGNC:16966]	GO:0007049:cell cycle;GO:0006325:chromatin organization;GO:0051607:defense response to virus;GO:2001237:negative regulation of extrinsic apoptotic signaling pathway;GO:0043124:negative regulation of canonical NF-kappaB signal transduction;GO:0046329:negative regulation of JNK cascade;GO:0045892:negative regulation of DNA-templated transcription;GO:0034243:regulation of transcription elongation by…	GO:0005694:chromosome;GO:0005654:nucleoplasm;GO:0005634:nucleus;	GO:0003690:double-stranded DNA binding;GO:0035064:methylated histone binding;GO:0003714:transcription corepressor activity;GO:0008270:zinc ion binding;	-	-
ENSG00000015285	3402	0	0	2	0.03	0	0	2	0.03	0	0	3	0.06	5	0.09	1	0.02	1	0.02	0	0	1	0.02	0	0	2	0.03	4	0.07	6	0.1	X	48676596	48691431	+	WAS	WASP actin nucleation promoting factor [Source:HGNC Symbol%3BAcc:HGNC:12731]	GO:0030041:actin filament polymerization;GO:0030048:actin filament-based movement;GO:0008154:actin polymerization or depolymerization;GO:0007596:blood coagulation;GO:0032488:Cdc42 protein signal transduction;GO:0071346:cellular response to type II interferon;GO:0006952:defense response;GO:0016197:endosomal transport;GO:0008544:epidermis development;GO:0006955:immune response;GO:2000146:negative r…	GO:0015629:actin cytoskeleton;GO:0005884:actin filament;GO:0005911:cell-cell junction;GO:0005829:cytosol;GO:0070062:extracellular exosome;GO:0005634:nucleus;GO:0045335:phagocytic vesicle;GO:0005886:plasma membrane;GO:0035861:site of double-strand break;GO:0012506:vesicle membrane;	GO:0003779:actin binding;GO:0030695:GTPase regulator activity;GO:0042802:identical protein binding;GO:0043274:phospholipase binding;GO:0019901:protein kinase binding;GO:0017124:SH3 domain binding;GO:0031267:small GTPase binding;	K05747	;ko04062 Chemokine signaling pathway;ko04520 Adherens junction;ko04530 Tight junction;ko04666 Fc gamma R-mediated phagocytosis;ko05135 Yersinia infection;ko05231 Choline metabolism in cancer;
ENSG00000015413	2737	0	0	0	0	0	0	0	0	0	0	0	0	0	0	1	0.02	0	0	0	0	0	0	0	0	0	0	1	0.02	0	0	16	89613308	89638456	+	DPEP1	dipeptidase 1 [Source:HGNC Symbol%3BAcc:HGNC:3002]	GO:0016999:antibiotic metabolic process;GO:0072340:lactam catabolic process;GO:0071277:cellular response to calcium ion;GO:0071732:cellular response to nitric oxide;GO:0006751:glutathione catabolic process;GO:0006749:glutathione metabolic process;GO:0050667:homocysteine metabolic process;GO:0006954:inflammatory response;GO:0006691:leukotriene metabolic process;GO:0006629:lipid metabolic process;G…	GO:0031225:obsolete anchored component of membrane;GO:0045177:apical part of cell;GO:0016324:apical plasma membrane;GO:0030054:cell junction;GO:0070062:extracellular exosome;GO:0005615:extracellular space;GO:0031528:microvillus membrane;GO:0005654:nucleoplasm;GO:0005886:plasma membrane;	GO:0008800:beta-lactamase activity;GO:0043027:cysteine-type endopeptidase inhibitor activity involved in apoptotic process;GO:0034235:GPI anchor binding;GO:0070573:metallodipeptidase activity;GO:0008235:metalloexopeptidase activity;GO:0072341:modified amino acid binding;GO:0008270:zinc ion binding;	K01273	-
ENSG00000015475	4420	225	3.44	298	3.37	383	3.93	263	3.41	224	3.33	255	3.67	273	3.59	233	3.43	285	3.78	235	3.13	272	3.25	281	3.77	275	3.01	242	3.1	284	3.58	22	17734138	17774770	-	BID	BH3 interacting domain death agonist [Source:HGNC Symbol%3BAcc:HGNC:1050]	GO:0006919:activation of cysteine-type endopeptidase activity involved in apoptotic process;GO:0008637:apoptotic mitochondrial changes;GO:0007420:brain development;GO:0090150:establishment of protein localization to membrane;GO:0008625:extrinsic apoptotic signaling pathway via death domain receptors;GO:0034349:glial cell apoptotic process;GO:0097284:hepatocyte apoptotic process;GO:0042775:mitocho…	GO:0005829:cytosol;GO:0032592:obsolete integral component of mitochondrial membrane;GO:0016020:membrane;GO:0005741:mitochondrial outer membrane;GO:0005739:mitochondrion;	GO:0005123:death receptor binding;GO:0031625:ubiquitin protein ligase binding;	K04726	;ko01524 Platinum drug resistance;ko04071 Sphingolipid signaling pathway;ko04115 p53 signaling pathway;ko04210 Apoptosis;ko04215 Apoptosis - multiple species;ko04217 Necroptosis;ko04650 Natural killer cell mediated cytotoxicity;ko04932 Non-alcoholic fatty liver disease;ko05010 Alzheimer disease;ko05014 Amyotrophic lateral sclerosis;ko05022 Pathways of neurodegeneration - multiple diseases;ko05152…
ENSG00000015479	12064	122	0.68	174	0.72	180	0.68	119	0.56	159	0.87	139	0.73	158	0.76	152	0.82	141	0.68	163	0.8	136	0.6	135	0.66	181	0.72	150	0.7	148	0.68	5	139293674	139331677	+	MATR3	matrin 3 [Source:HGNC Symbol%3BAcc:HGNC:6912]	GO:0002218:activation of innate immune response;GO:0003170:heart valve development;GO:0045087:innate immune response;GO:0010608:post-transcriptional regulation of gene expression;GO:0003281:ventricular septum development;	GO:0016020:membrane;GO:0005637:nuclear inner membrane;GO:0016363:nuclear matrix;GO:0005634:nucleus;	GO:0042802:identical protein binding;GO:0035198:miRNA binding;GO:0003723:RNA binding;GO:0005198:structural molecule activity;GO:0008270:zinc ion binding;	K13213	;ko05014 Amyotrophic lateral sclerosis;
ENSG00000015520	5267	1	0.01	6	0.06	3	0.03	1	0.01	2	0.02	5	0.06	7	0.08	6	0.07	4	0.04	5	0.06	1	0.01	2	0.02	1	0.01	1	0.01	1	0.01	7	44512535	44541330	-	NPC1L1	NPC1 like intracellular cholesterol transporter 1 [Source:HGNC Symbol%3BAcc:HGNC:7898]	GO:0071501:cellular response to sterol depletion;GO:0006695:cholesterol biosynthetic process;GO:0030301:cholesterol transport;GO:0030299:intestinal cholesterol absorption;GO:0042157:lipoprotein metabolic process;	GO:0016324:apical plasma membrane;GO:0030659:cytoplasmic vesicle membrane;GO:0005886:plasma membrane;GO:0044214:obsolete spanning component of plasma membrane;	GO:0031489:myosin V binding;GO:0031267:small GTPase binding;	K14461	;ko04975 Fat digestion and absorption;
ENSG00000015532	5472	243	3	311	2.85	337	2.79	275	2.88	233	2.8	232	2.7	240	2.55	210	2.5	255	2.73	233	2.51	293	2.83	225	2.44	287	2.53	240	2.49	287	2.92	17	50346126	50363138	+	XYLT2	xylosyltransferase 2 [Source:HGNC Symbol%3BAcc:HGNC:15517]	GO:0030206:chondroitin sulfate biosynthetic process;GO:0050650:chondroitin sulfate proteoglycan biosynthetic process;GO:0006024:glycosaminoglycan biosynthetic process;GO:0030203:glycosaminoglycan metabolic process;GO:0015012:heparan sulfate proteoglycan biosynthetic process;GO:0030210:heparin biosynthetic process;	GO:0005615:extracellular space;GO:0000139:Golgi membrane;	GO:0000287:magnesium ion binding;GO:0030145:manganese ion binding;GO:0030158:protein xylosyltransferase activity;	K00771;K15696	-
ENSG00000015568	14185	10	0.05	15	0.05	11	0.04	12	0.05	14	0.06	13	0.06	13	0.05	11	0.05	15	0.06	15	0.06	9	0.03	14	0.06	12	0.04	5	0.02	9	0.04	2	109792758	109857705	+	RGPD5	RANBP2 like and GRIP domain containing 5 [Source:HGNC Symbol%3BAcc:HGNC:32418]	GO:0006607:NLS-bearing protein import into nucleus;GO:0050790:regulation of catalytic activity;GO:0090161:Golgi ribbon formation;GO:0034499:late endosome to Golgi transport;GO:0034453:microtubule anchoring;GO:0031023:microtubule organizing center organization;GO:0034067:protein localization to Golgi apparatus;GO:0006622:protein targeting to lysosome;GO:0071955:recycling endosome to Golgi transpor…	GO:0005737:cytoplasm;GO:0005643:nuclear pore;GO:0005829:cytosol;GO:0005794:Golgi apparatus;GO:0016020:membrane;GO:0005654:nucleoplasm;GO:0005802:trans-Golgi network;	GO:0031267:small GTPase binding;GO:0042802:identical protein binding;	K12172	;ko03013 Nucleocytoplasmic transport;ko03250 Viral life cycle - HIV-1;ko05014 Amyotrophic lateral sclerosis;
ENSG00000015592	3309	0	0	1	0.02	0	0	0	0	0	0	0	0	0	0	0	0	0	0	0	0	1	0.02	0	0	0	0	0	0	1	0.02	8	27235308	27258420	-	STMN4	stathmin 4 [Source:HGNC Symbol%3BAcc:HGNC:16078]	GO:0031110:regulation of microtubule polymerization or depolymerization;	GO:0005794:Golgi apparatus;GO:0030426:growth cone;	-	-	-
ENSG00000015676	9893	881	6.01	1172	5.93	1310	6	1101	6.37	871	5.79	961	6.18	979	5.76	860	5.66	908	5.38	940	5.6	1025	5.48	938	5.62	1247	6.09	1126	6.45	1188	6.68	7	44379119	44490658	-	NUDCD3	NudC domain containing 3 [Source:HGNC Symbol%3BAcc:HGNC:22208]	GO:0060271:cilium assembly;GO:0006457:protein folding;GO:1905793:protein localization to pericentriolar material;	GO:0005737:cytoplasm;GO:0005868:cytoplasmic dynein complex;	GO:0051082:unfolded protein binding;	K15691	-
ENSG00000016082	2817	136	3.26	224	3.98	248	3.99	193	3.92	165	3.85	166	3.75	236	4.87	208	4.81	203	4.22	179	3.74	210	3.94	201	4.23	236	4.05	201	4.04	180	3.56	5	51383448	51394730	+	ISL1	ISL LIM homeobox 1 [Source:HGNC Symbol%3BAcc:HGNC:6132]	GO:0060413:atrial septum morphogenesis;GO:0031103:axon regeneration;GO:0007409:axonogenesis;GO:0060913:cardiac cell fate determination;	GO:0000785:chromatin;GO:0005737:cytoplasm;GO:0005634:nucleus;	GO:0043425:bHLH transcription factor binding;GO:0000987:cis-regulatory region sequence-specific DNA binding;GO:0001228:DNA-binding transcription activator activity, RNA polymerase II-specific;GO:0000981:DNA-binding transcription factor activity, RNA polymerase II-specific;	K09370	;ko04550 Signaling pathways regulating pluripotency of stem cells;
ENSG00000016391	7787	80	0.69	100	0.64	95	0.55	79	0.58	78	0.66	94	0.77	92	0.69	92	0.77	94	0.71	79	0.6	75	0.51	67	0.51	117	0.73	97	0.71	99	0.71	3	53812335	53846419	-	CHDH	choline dehydrogenase [Source:HGNC Symbol%3BAcc:HGNC:24288]	GO:0042426:choline catabolic process;GO:0019285:glycine betaine biosynthetic process from choline;	GO:0005743:mitochondrial inner membrane;	GO:0008812:choline dehydrogenase activity;GO:0050660:flavin adenine dinucleotide binding;GO:0016491:oxidoreductase activity;	K00108	;ko00260 Glycine, serine and threonine metabolism;ko01100 Metabolic pathways;
ENSG00000016402	4730	11	0.16	28	0.3	21	0.2	18	0.22	13	0.18	19	0.26	17	0.21	21	0.29	10	0.12	13	0.16	19	0.21	15	0.19	27	0.28	21	0.25	15	0.18	6	136999971	137045180	-	IL20RA	interleukin 20 receptor subunit alpha [Source:HGNC Symbol%3BAcc:HGNC:6003]	GO:0019221:cytokine-mediated signaling pathway;GO:2001244:positive regulation of intrinsic apoptotic signaling pathway;GO:0045124:regulation of bone resorption;	GO:0005886:plasma membrane;	GO:0004896:cytokine receptor activity;GO:0042015:interleukin-20 binding;	K05136	;ko04060 Cytokine-cytokine receptor interaction;ko04061 Viral protein interaction with cytokine and cytokine receptor;ko04630 JAK-STAT signaling pathway;
ENSG00000016490	3310	0	0	0	0	0	0	0	0	0	0	0	0	0	0	0	0	0	0	0	0	0	0	0	0	0	0	0	0	0	0	1	86468368	86500259	+	CLCA1	chloride channel accessory 1 [Source:HGNC Symbol%3BAcc:HGNC:2015]	GO:0006816:calcium ion transport;GO:0071456:cellular response to hypoxia;GO:0006821:chloride transport;GO:0034220:monoatomic ion transmembrane transport;	GO:0005615:extracellular space;GO:0005902:microvillus;GO:0005886:plasma membrane;GO:0042589:zymogen granule membrane;	GO:0005254:chloride channel activity;GO:0005229:intracellular calcium activated chloride channel activity;GO:0046872:metal ion binding;GO:0004222:metalloendopeptidase activity;	K05027	;ko04924 Renin secretion;ko04972 Pancreatic secretion;
ENSG00000016602	3447	0	0	0	0	0	0	0	0	0	0	0	0	0	0	0	0	0	0	0	0	0	0	0	0	0	0	0	0	0	0	1	86547078	86580754	+	CLCA4	chloride channel accessory 4 [Source:HGNC Symbol%3BAcc:HGNC:2018]	GO:0006821:chloride transport;GO:0034220:monoatomic ion transmembrane transport;	GO:0016324:apical plasma membrane;GO:0005576:extracellular region;GO:0005886:plasma membrane;	GO:0005254:chloride channel activity;GO:0005229:intracellular calcium activated chloride channel activity;GO:0046872:metal ion binding;GO:0004222:metalloendopeptidase activity;	K05030	;ko04924 Renin secretion;ko04972 Pancreatic secretion;
ENSG00000016864	3785	1329	23.7	1684	22.27	1829	21.91	1449	21.93	1357	23.58	1247	20.96	1472	22.63	1248	21.47	1395	21.6	1403	21.84	1561	21.8	1339	20.95	1872	23.89	1607	24.06	1702	25.02	3	52694486	52706032	-	GLT8D1	glycosyltransferase 8 domain containing 1 [Source:HGNC Symbol%3BAcc:HGNC:24870]	-	GO:0005794:Golgi apparatus;GO:0016020:membrane;	GO:0016757:glycosyltransferase activity;	K09228	;ko05168 Herpes simplex virus 1 infection;
ENSG00000017260	8510	3451	27.37	5002	29.42	5425	28.9	4075	27.43	3446	26.63	3582	26.78	3830	26.19	3542	27.11	4274	29.43	4201	29.08	4556	28.3	4361	30.35	4076	23.13	3464	23.07	3801	24.85	3	130850595	131016712	+	ATP2C1	ATPase secretory pathway Ca2+ transporting 1 [Source:HGNC Symbol%3BAcc:HGNC:13211]	GO:0031532:obsolete actin cytoskeleton reorganization;GO:0070588:calcium ion transmembrane transport;GO:0006816:calcium ion transport;GO:0016339:calcium-dependent cell-cell adhesion via plasma membrane cell adhesion molecules;GO:0006874:intracellular calcium ion homeostasis;GO:0030026:intracellular manganese ion homeostasis;GO:0008544:epidermis development;GO:0032468:Golgi calcium ion homeostasis…	GO:0033106:cis-Golgi network membrane;GO:0005783:endoplasmic reticulum;GO:0005794:Golgi apparatus;GO:0032580:Golgi cisterna membrane;GO:0000139:Golgi membrane;GO:0030173:obsolete integral component of Golgi membrane;GO:0016020:membrane;GO:0005886:plasma membrane;GO:0005802:trans-Golgi network;	GO:0015410:ABC-type manganese transporter activity;GO:0005524:ATP binding;GO:0005509:calcium ion binding;GO:0030145:manganese ion binding;GO:0046872:metal ion binding;GO:0005388:P-type calcium transporter activity;GO:0140613:P-type manganese transporter activity;GO:0008553:P-type proton-exporting transporter activity;	K01537	-
ENSG00000017427	8115	8	0.07	6	0.04	11	0.06	5	0.04	4	0.03	4	0.03	8	0.06	4	0.03	8	0.06	8	0.06	13	0.08	10	0.07	10	0.06	8	0.06	11	0.08	12	102395874	102481744	-	IGF1	insulin like growth factor 1 [Source:HGNC Symbol%3BAcc:HGNC:5464]	GO:0000187:obsolete activation of MAPK activity;GO:0032148:activation of protein kinase B activity;GO:0035630:bone mineralization involved in bone maturation;GO:0001775:cell activation;GO:0048009:insulin-like growth factor receptor signaling pathway;GO:0043066:negative regulation of apoptotic process;GO:0090201:negative regulation of release of cytochrome c from mitochondria;GO:0008284:positive r…	GO:0035867:alphav-beta3 integrin-IGF-1-IGF1R complex;GO:0070382:exocytic vesicle;GO:0005576:extracellular region;GO:0005615:extracellular space;	GO:0008083:growth factor activity;GO:0005179:hormone activity;GO:0005158:insulin receptor binding;GO:0005159:insulin-like growth factor receptor binding;	K05459	;ko01521 EGFR tyrosine kinase inhibitor resistance;ko01522 Endocrine resistance;ko04010 MAPK signaling pathway;ko04014 Ras signaling pathway;ko04015 Rap1 signaling pathway;ko04066 HIF-1 signaling pathway;ko04068 FoxO signaling pathway;ko04114 Oocyte meiosis;ko04115 p53 signaling pathway;ko04150 mTOR signaling pathway;ko04151 PI3K-Akt signaling pathway;ko04152 AMPK signaling pathway;ko04211 Longev…
ENSG00000017483	4017	2746	46.15	3683	45.9	4163	46.99	3275	46.7	2562	41.94	3018	47.8	3060	44.32	2709	43.92	3196	46.62	3150	46.19	3638	47.87	3250	47.92	3311	39.81	2799	39.48	3080	42.66	X	48458537	48470260	-	SLC38A5	solute carrier family 38 member 5 [Source:HGNC Symbol%3BAcc:HGNC:18070]	GO:0003333:amino acid transmembrane transport;GO:0006865:amino acid transport;GO:1903713:asparagine transmembrane transport;GO:0006868:glutamine transport;GO:0015816:glycine transport;GO:1904557:L-alanine transmembrane transport;GO:0089709:L-histidine transmembrane transport;GO:0015825:L-serine transport;GO:0032329:serine transport;GO:0150104:transport across blood-brain barrier;	GO:0005886:plasma membrane;	GO:0022858:alanine transmembrane transporter activity;GO:0015171:amino acid transmembrane transporter activity;GO:0015187:glycine transmembrane transporter activity;GO:0015182:L-asparagine transmembrane transporter activity;GO:0015186:L-glutamine transmembrane transporter activity;GO:0005290:L-histidine transmembrane transporter activity;GO:0015194:L-serine transmembrane transporter activity;GO:0…	K14992	;ko04727 GABAergic synapse;
ENSG00000017797	8041	1131	9.49	1578	9.82	1793	10.11	1275	9.08	1140	9.32	1119	8.85	1325	9.59	1160	9.39	1356	9.88	1170	8.57	1342	8.82	1221	8.99	1543	9.27	1358	9.57	1427	9.87	18	9475009	9538114	+	RALBP1	ralA binding protein 1 [Source:HGNC Symbol%3BAcc:HGNC:9841]	GO:0006935:chemotaxis;GO:1900753:doxorubicin transport;GO:0006897:endocytosis;GO:0043547:positive regulation of GTPase activity;GO:0090141:positive regulation of mitochondrial fission;GO:0001934:positive regulation of protein phosphorylation;GO:0032489:regulation of Cdc42 protein signal transduction;GO:0043087:regulation of GTPase activity;GO:0051056:regulation of small GTPase mediated signal tra…	GO:0005829:cytosol;GO:0016020:membrane;GO:0005739:mitochondrion;GO:0005634:nucleus;GO:0005886:plasma membrane;GO:0000922:spindle pole;GO:0030027:lamellipodium;	GO:0015431:ABC-type glutathione S-conjugate transporter activity;GO:0008559:ABC-type xenobiotic transporter activity;GO:0005524:ATP binding;GO:0042626:ATPase-coupled transmembrane transporter activity;GO:0005096:GTPase activator activity;GO:0031267:small GTPase binding;GO:0022857:transmembrane transporter activity;GO:0042910:xenobiotic transmembrane transporter activity;	K08773;K03131	;ko04014 Ras signaling pathway;ko05200 Pathways in cancer;ko05212 Pancreatic cancer;;ko03022 Basal transcription factors;
ENSG00000018189	9405	223	1.6	329	1.75	336	1.62	267	1.63	265	1.85	255	1.73	236	1.46	213	1.47	274	1.71	278	1.74	289	1.62	274	1.73	348	1.79	293	1.77	301	1.78	4	70704204	70808619	+	RUFY3	RUN and FYVE domain containing 3 [Source:HGNC Symbol%3BAcc:HGNC:30285]	GO:0007015:actin filament organization;GO:0050771:negative regulation of axonogenesis;GO:0045773:positive regulation of axon extension;GO:0030335:positive regulation of cell migration;GO:0090316:positive regulation of intracellular protein transport;GO:0050770:regulation of axonogenesis;GO:2000114:regulation of establishment of cell polarity;	GO:0030424:axon;GO:0030054:cell junction;GO:0005737:cytoplasm;GO:0005829:cytosol;GO:0030425:dendrite;GO:0012505:endomembrane system;GO:0030175:filopodium;GO:0030426:growth cone;GO:0030027:lamellipodium;GO:0016020:membrane;GO:0043025:neuronal cell body;GO:0043204:perikaryon;	-	K12482;K16467	-
ENSG00000018236	7492	0	0	0	0	1	0.01	0	0	0	0	1	0.01	0	0	1	0.01	0	0	0	0	0	0	0	0	0	0	0	0	0	0	12	40692439	41072415	+	CNTN1	contactin 1 [Source:HGNC Symbol%3BAcc:HGNC:2171]	GO:0007155:cell adhesion;GO:0021549:cerebellum development;GO:0031175:neuron projection development;GO:0007219:Notch signaling pathway;GO:0010628:positive regulation of gene expression;GO:0010976:positive regulation of neuron projection development;GO:0050731:positive regulation of peptidyl-tyrosine phosphorylation;GO:0010765:positive regulation of sodium ion transport;	GO:0099025:obsolete anchored component of postsynaptic membrane;GO:0099026:obsolete anchored component of presynaptic membrane;GO:0070062:extracellular exosome;GO:0016020:membrane;GO:0045121:membrane raft;GO:0043209:myelin sheath;GO:0005886:plasma membrane;	GO:0030246:carbohydrate binding;	K06759	;ko04514 Cell adhesion molecules;
ENSG00000018280	8676	1	0.01	3	0.02	2	0.01	1	0.01	1	0.01	1	0.01	1	0.01	3	0.02	3	0.02	2	0.01	0	0	4	0.03	3	0.02	1	0.01	3	0.02	2	218382029	218396894	+	SLC11A1	solute carrier family 11 member 1 [Source:HGNC Symbol%3BAcc:HGNC:10907]	GO:0032147:activation of protein kinase activity;GO:0048002:antigen processing and presentation of peptide antigen;GO:0019730:antimicrobial humoral response;GO:0070574:cadmium ion transmembrane transport;GO:0045454:cell redox homeostasis;GO:0006876:obsolete intracellular cadmium ion homeostasis;GO:0006879:intracellular iron ion homeostasis;GO:0042742:defense response to bacterium;GO:0050829:defen…	GO:0101003:ficolin-1-rich granule membrane;GO:0005770:late endosome;GO:0031902:late endosome membrane;GO:0005764:lysosome;GO:0030670:phagocytic vesicle membrane;GO:0005886:plasma membrane;GO:0070821:tertiary granule membrane;GO:0010008:endosome membrane;	GO:0015086:cadmium ion transmembrane transporter activity;GO:0005381:iron ion transmembrane transporter activity;GO:0005384:manganese ion transmembrane transporter activity;GO:0051139:metal cation:proton antiporter activity;GO:0042803:protein homodimerization activity;GO:0046915:transition metal ion transmembrane transporter activity;GO:0046873:metal ion transmembrane transporter activity;	K12347	;ko04142 Lysosome;
ENSG00000018408	8353	2187	17.67	3228	19.34	3376	18.33	2461	16.87	2456	19.34	2480	18.89	2577	17.95	2367	18.45	2517	17.66	2722	19.2	2829	17.9	2556	18.12	3591	20.76	2929	19.87	2858	19.04	3	149517235	149736714	-	WWTR1	WW domain containing transcription regulator 1 [Source:HGNC Symbol%3BAcc:HGNC:24042]	GO:0060271:cilium assembly;GO:0032835:glomerulus development;GO:0003015:heart process;GO:0035329:hippo signaling;GO:0060993:kidney morphogenesis;GO:0048762:mesenchymal cell differentiation;GO:0035264:multicellular organism growth;GO:0090090:negative regulation of canonical Wnt signaling pathway;GO:0045599:negative regulation of fat cell differentiation;GO:0006469:negative regulation of protein ki…	GO:0005737:cytoplasm;GO:0005829:cytosol;GO:0016604:nuclear body;GO:0005654:nucleoplasm;GO:0005634:nucleus;GO:0005886:plasma membrane;GO:0005667:transcription regulator complex;	GO:0042803:protein homodimerization activity;GO:0003713:transcription coactivator activity;GO:0003714:transcription corepressor activity;	K16820	;ko04390 Hippo signaling pathway;ko04392 Hippo signaling pathway - multiple species;
ENSG00000018510	15223	3511	15.57	5034	16.55	5332	15.88	3970	14.94	3473	15	3556	14.86	3925	15	3500	14.97	4110	15.82	4523	17.5	4733	16.43	4187	16.29	4708	14.94	4131	15.38	4068	14.87	2	177392746	177567024	+	AGPS	alkylglycerone phosphate synthase [Source:HGNC Symbol%3BAcc:HGNC:327]	GO:0008611:ether lipid biosynthetic process;GO:0008610:lipid biosynthetic process;	GO:0005829:cytosol;GO:0016020:membrane;GO:0005739:mitochondrion;GO:0005730:nucleolus;GO:0005782:peroxisomal matrix;GO:0005778:peroxisomal membrane;GO:0005777:peroxisome;	GO:0008609:alkylglycerone-phosphate synthase activity;GO:0071949:FAD binding;GO:0016491:oxidoreductase activity;	K00803	;ko00565 Ether lipid metabolism;ko01100 Metabolic pathways;ko04146 Peroxisome;
ENSG00000018607	5310	0	0	0	0	0	0	0	0	0	0	0	0	0	0	0	0	0	0	0	0	0	0	0	0	0	0	0	0	0	0	2	132304806	132326855	+	ZNF285CP	zinc finger protein 285C%2C pseudogene [Source:HGNC Symbol%3BAcc:HGNC:33228]	GO:0006357:regulation of transcription by RNA polymerase II;	GO:0005634:nucleus;	GO:0000981:DNA-binding transcription factor activity, RNA polymerase II-specific;GO:0046872:metal ion binding;GO:0000978:RNA polymerase II cis-regulatory region sequence-specific DNA binding;	K09228	;ko05168 Herpes simplex virus 1 infection;
ENSG00000018610	2581	496	12.97	700	13.58	735	12.91	554	12.29	476	12.13	499	12.3	535	12.06	490	12.36	571	12.96	557	12.71	638	13.07	539	12.37	667	12.48	576	12.65	621	13.39	X	119538149	119565409	-	STEEP1	STING1 ER exit protein 1 [Source:HGNC Symbol%3BAcc:HGNC:26239]	GO:0090158:endoplasmic reticulum membrane organization;GO:0006888:endoplasmic reticulum to Golgi vesicle-mediated transport;	GO:0044297:cell body;GO:0005737:cytoplasm;GO:0005634:nucleus;	-	K02927	;ko03010 Ribosome;ko04120 Ubiquitin mediated proteolysis;ko04137 Mitophagy - animal;ko04140 Autophagy - animal;ko05012 Parkinson disease;ko05022 Pathways of neurodegeneration - multiple diseases;ko05131 Shigellosis;ko05167 Kaposi sarcoma-associated herpesvirus infection;ko05171 Coronavirus disease - COVID-19;
ENSG00000018625	6298	2	0.02	1	0.01	0	0	2	0.02	0	0	0	0	1	0.01	0	0	0	0	1	0.01	1	0.01	1	0.01	1	0.01	2	0.02	0	0	1	160115759	160143591	+	ATP1A2	ATPase Na+/K+ transporting subunit alpha 2 [Source:HGNC Symbol%3BAcc:HGNC:800]	GO:0008344:adult locomotory behavior;GO:0021764:amygdala development;GO:0046034:ATP metabolic process;GO:0001662:behavioral fear response;	GO:0005901:caveola;GO:0042995:cell projection;GO:0005737:cytoplasm;GO:0043197:dendritic spine;GO:0005886:plasma membrane;	GO:0005524:ATP binding;GO:0016887:ATP hydrolysis activity;GO:0019829:ATPase-coupled monoatomic cation transmembrane transporter activity;GO:0051087:protein-folding chaperone binding;GO:0046872:metal ion binding;GO:0005391:P-type sodium:potassium-exchanging transporter activity;	K01539	;ko04022 cGMP-PKG signaling pathway;ko04024 cAMP signaling pathway;ko04260 Cardiac muscle contraction;ko04261 Adrenergic signaling in cardiomyocytes;ko04911 Insulin secretion;ko04918 Thyroid hormone synthesis;ko04919 Thyroid hormone signaling pathway;ko04925 Aldosterone synthesis and secretion;ko04960 Aldosterone-regulated sodium reabsorption;ko04961 Endocrine and other factor-regulated calcium r…
ENSG00000018699	3443	431	8.45	571	8.3	642	8.45	500	8.32	422	8.06	450	8.32	485	8.2	459	8.68	486	8.27	476	8.14	560	8.6	511	8.79	499	7	487	8.02	486	7.85	2	32628032	32821051	+	TTC27	tetratricopeptide repeat domain 27 [Source:HGNC Symbol%3BAcc:HGNC:25986]	-	-	-	K16467	-
ENSG00000018869	3341	0	0	0	0	0	0	0	0	0	0	0	0	0	0	0	0	0	0	0	0	0	0	0	0	0	0	0	0	0	0	19	56375846	56393538	-	ZNF582	zinc finger protein 582 [Source:HGNC Symbol%3BAcc:HGNC:26421]	GO:0006355:regulation of DNA-templated transcription;GO:0000122:negative regulation of transcription by RNA polymerase II;GO:0006357:regulation of transcription by RNA polymerase II;	GO:0005737:cytoplasm;GO:0005634:nucleus;	GO:0003677:DNA binding;GO:0046872:metal ion binding;GO:0000981:DNA-binding transcription factor activity, RNA polymerase II-specific;GO:0001227:DNA-binding transcription repressor activity, RNA polymerase II-specific;GO:0000977:RNA polymerase II transcription regulatory region sequence-specific DNA binding;	K09228	;ko05168 Herpes simplex virus 1 infection;
ENSG00000019102	1447	0	0	1	0.03	3	0.09	3	0.12	2	0.09	2	0.09	4	0.16	2	0.09	2	0.08	1	0.04	4	0.15	1	0.04	2	0.07	1	0.04	0	0	11	124747474	124752255	-	VSIG2	V-set and immunoglobulin domain containing 2 [Source:HGNC Symbol%3BAcc:HGNC:17149]	-	GO:0016020:membrane;	-	-	-
ENSG00000019144	21691	230	0.72	352	0.81	428	0.89	342	0.9	257	0.78	297	0.87	347	0.93	283	0.85	291	0.79	284	0.77	350	0.85	264	0.72	420	0.94	360	0.94	328	0.84	11	118606440	118658031	+	PHLDB1	pleckstrin homology like domain family B member 1 [Source:HGNC Symbol%3BAcc:HGNC:23697]	GO:1904261:positive regulation of basement membrane assembly involved in embryonic body morphogenesis;GO:0010717:regulation of epithelial to mesenchymal transition;GO:0010470:regulation of gastrulation;GO:0070507:regulation of microtubule cytoskeleton organization;	GO:0045180:basal cortex;	-	K15696;K11222;K06115;K17985	-;ko04137 Mitophagy - animal;ko04140 Autophagy - animal;ko05010 Alzheimer disease;ko05014 Amyotrophic lateral sclerosis;ko05016 Huntington disease;ko05017 Spinocerebellar ataxia;ko05022 Pathways of neurodegeneration - multiple diseases;
ENSG00000019169	2051	0	0	0	0	1	0.02	0	0	0	0	0	0	2	0.06	0	0	0	0	1	0.03	0	0	0	0	1	0.02	0	0	0	0	2	118942194	118994660	+	MARCO	macrophage receptor with collagenous structure [Source:HGNC Symbol%3BAcc:HGNC:6895]	GO:0007193:adenylate cyclase-inhibiting G protein-coupled receptor signaling pathway;GO:0097242:amyloid-beta clearance;GO:0043277:apoptotic cell clearance;GO:0007166:cell surface receptor signaling pathway;GO:0006897:endocytosis;GO:0045087:innate immune response;GO:0006911:phagocytosis, engulfment;GO:0070374:positive regulation of ERK1 and ERK2 cascade;GO:0001934:positive regulation of protein ph…	GO:0005581:collagen trimer;GO:0005737:cytoplasm;GO:0030666:endocytic vesicle membrane;GO:0005886:plasma membrane;	GO:0001540:amyloid-beta binding;GO:0038024:cargo receptor activity;GO:0001664:G protein-coupled receptor binding;GO:0038187:pattern recognition receptor activity;GO:0005044:scavenger receptor activity;GO:0004888:transmembrane signaling receptor activity;	K13884	;ko04145 Phagosome;
ENSG00000019186	3988	7	0.12	28	0.35	14	0.16	14	0.2	12	0.2	14	0.22	12	0.18	12	0.2	12	0.18	15	0.22	11	0.15	10	0.15	11	0.13	21	0.3	19	0.27	20	54153446	54173986	-	CYP24A1	cytochrome P450 family 24 subfamily A member 1 [Source:HGNC Symbol%3BAcc:HGNC:2602]	GO:0010430:fatty acid omega-oxidation;GO:0001649:osteoblast differentiation;GO:0033280:response to vitamin D;GO:0042369:vitamin D catabolic process;GO:0042359:vitamin D metabolic process;GO:0070561:vitamin D receptor signaling pathway;GO:0006766:vitamin metabolic process;	GO:0005743:mitochondrial inner membrane;GO:0005739:mitochondrion;GO:0005654:nucleoplasm;	GO:0062181:1-alpha,25-dihydroxyvitamin D3 23-hydroxylase activity;GO:0030342:1-alpha,25-dihydroxyvitamin D3 24-hydroxylase activity;GO:0062180:25-hydroxycholecalciferol-23-hydroxylase activity;GO:0008403:25-hydroxycholecalciferol-24-hydroxylase activity;GO:0020037:heme binding;GO:0005506:iron ion binding;GO:0070643:vitamin D 25-hydroxylase activity;	K07436	;ko00100 Steroid biosynthesis;ko01100 Metabolic pathways;ko04928 Parathyroid hormone synthesis, secretion and action;ko05206 MicroRNAs in cancer;
ENSG00000019485	13976	316	1.53	445	1.59	526	1.71	430	1.76	370	1.74	405	1.84	432	1.8	369	1.72	407	1.71	369	1.56	422	1.6	404	1.71	526	1.82	398	1.61	459	1.83	11	45095806	45235110	+	PRDM11	PR/SET domain 11 [Source:HGNC Symbol%3BAcc:HGNC:13996]	GO:0032259:methylation;GO:0030308:negative regulation of cell growth;GO:0045892:negative regulation of DNA-templated transcription;GO:2000271:positive regulation of fibroblast apoptotic process;GO:0045893:positive regulation of DNA-templated transcription;GO:0051726:regulation of cell cycle;GO:0010468:regulation of gene expression;GO:0043408:regulation of MAPK cascade;	GO:0005829:cytosol;GO:0005634:nucleus;	GO:0003682:chromatin binding;GO:0008168:methyltransferase activity;	-	-
ENSG00000019505	5445	3	0.04	6	0.06	1	0.01	3	0.03	0	0	4	0.05	2	0.02	0	0	2	0.02	2	0.02	1	0.01	2	0.02	3	0.03	2	0.02	1	0.01	11	45240302	45286341	-	SYT13	synaptotagmin 13 [Source:HGNC Symbol%3BAcc:HGNC:14962]	GO:0017156:calcium-ion regulated exocytosis;GO:0071277:cellular response to calcium ion;GO:0017158:regulation of calcium ion-dependent exocytosis;GO:0014059:regulation of dopamine secretion;GO:0006906:vesicle fusion;GO:0016192:vesicle-mediated transport;	GO:0030424:axon;GO:0070382:exocytic vesicle;GO:0043231:intracellular membrane-bounded organelle;GO:0005886:plasma membrane;GO:0045202:synapse;GO:0030133:transport vesicle;	GO:0005509:calcium ion binding;GO:0005544:calcium-dependent phospholipid binding;GO:0030276:clathrin binding;GO:0001786:phosphatidylserine binding;GO:0000149:SNARE binding;	K12022	-
ENSG00000019549	3281	198	4.07	337	5.14	327	4.52	267	4.66	202	4.05	239	4.63	368	6.53	272	5.4	465	8.3	313	5.62	334	5.38	301	5.43	239	3.52	202	3.49	236	4	8	48917598	48921740	-	SNAI2	snail family transcriptional repressor 2 [Source:HGNC Symbol%3BAcc:HGNC:11094]	GO:0003180:aortic valve morphogenesis;GO:0003273:cell migration involved in endocardial cushion formation;GO:0071364:cellular response to epidermal growth factor stimulus;GO:0035921:desmosome disassembly;GO:0001837:epithelial to mesenchymal transition;GO:0003198:epithelial to mesenchymal transition involved in endocardial cushion formation;GO:0060429:epithelium development;GO:2000811:negative reg…	GO:0000785:chromatin;GO:0005737:cytoplasm;GO:0005654:nucleoplasm;GO:0005634:nucleus;	GO:0000981:DNA-binding transcription factor activity, RNA polymerase II-specific;GO:0001227:DNA-binding transcription repressor activity, RNA polymerase II-specific;GO:0070888:E-box binding;GO:0046872:metal ion binding;GO:0000978:RNA polymerase II cis-regulatory region sequence-specific DNA binding;GO:0000977:RNA polymerase II transcription regulatory region sequence-specific DNA binding;GO:00435…	K05706	;ko04390 Hippo signaling pathway;ko04520 Adherens junction;
ENSG00000019582	4526	7	0.1	0	0	2	0.02	4	0.05	3	0.04	4	0.06	7	0.09	6	0.09	5	0.06	8	0.1	10	0.12	6	0.08	7	0.07	3	0.04	4	0.05	5	150401637	150412969	-	CD74	CD74 molecule [Source:HGNC Symbol%3BAcc:HGNC:1697]	GO:0000187:obsolete activation of MAPK activity;GO:0019882:antigen processing and presentation;GO:0019883:antigen processing and presentation of endogenous antigen;GO:0019886:antigen processing and presentation of exogenous peptide antigen via MHC class II;	GO:0009986:cell surface;GO:0030669:clathrin-coated endocytic vesicle membrane;GO:0005737:cytoplasm;GO:0030666:endocytic vesicle membrane;	GO:0001540:amyloid-beta binding;GO:0042609:CD4 receptor binding;GO:0019955:cytokine binding;GO:0004896:cytokine receptor activity;	K06505	;ko04612 Antigen processing and presentation;ko05152 Tuberculosis;ko05168 Herpes simplex virus 1 infection;
ENSG00000019991	9753	0	0	0	0	0	0	0	0	0	0	0	0	0	0	0	0	0	0	0	0	0	0	0	0	0	0	2	0.01	0	0	7	81699010	81770438	-	HGF	hepatocyte growth factor [Source:HGNC Symbol%3BAcc:HGNC:4893]	GO:0031100:animal organ regeneration;GO:0060326:cell chemotaxis;GO:0000902:cell morphogenesis;GO:0035729:cellular response to hepatocyte growth factor stimulus;GO:0050673:epithelial cell proliferation;GO:0001837:epithelial to mesenchymal transition;GO:0048012:hepatocyte growth factor receptor signaling pathway;GO:0030212:hyaluronan metabolic process;GO:0001889:liver development;GO:0000278:mitotic…	GO:0005576:extracellular region;GO:0005615:extracellular space;GO:0016020:membrane;GO:0031093:platelet alpha granule lumen;	GO:0042056:chemoattractant activity;GO:0008083:growth factor activity;GO:0042802:identical protein binding;GO:0044877:protein-containing complex binding;GO:0004252:serine-type endopeptidase activity;	K05460	;ko01521 EGFR tyrosine kinase inhibitor resistance;ko04010 MAPK signaling pathway;ko04014 Ras signaling pathway;ko04015 Rap1 signaling pathway;ko04020 Calcium signaling pathway;ko04151 PI3K-Akt signaling pathway;ko04510 Focal adhesion;ko05144 Malaria;ko05200 Pathways in cancer;ko05205 Proteoglycans in cancer;ko05208 Chemical carcinogenesis - reactive oxygen species;ko05211 Renal cell carcinoma;ko…
ENSG00000019995	5993	380	4.28	437	3.65	485	3.67	415	3.97	332	3.64	358	3.8	399	3.87	364	3.96	455	4.45	397	3.9	456	4.02	369	3.65	440	3.55	409	3.87	425	3.95	10	124942123	124988189	+	ZRANB1	zinc finger RANBP2-type containing 1 [Source:HGNC Symbol%3BAcc:HGNC:18224]	GO:0016477:cell migration;GO:0007010:cytoskeleton organization;GO:0030177:positive regulation of Wnt signaling pathway;GO:0071947:protein deubiquitination involved in ubiquitin-dependent protein catabolic process;GO:0035523:protein K29-linked deubiquitination;GO:1990168:protein K33-linked deubiquitination;GO:0070536:protein K63-linked deubiquitination;GO:0022604:regulation of cell morphogenesis;G…	GO:0005737:cytoplasm;GO:0005829:cytosol;GO:0043231:intracellular membrane-bounded organelle;GO:0005654:nucleoplasm;GO:0005634:nucleus;	GO:0070530:K63-linked polyubiquitin modification-dependent protein binding;GO:0046872:metal ion binding;GO:0004843:cysteine-type deubiquitinase activity;	K11862	-
ENSG00000020129	4917	283	3.89	370	3.77	510	4.7	344	4.01	304	4.07	334	4.32	400	4.73	340	4.5	389	4.64	412	4.94	444	4.77	393	4.73	482	4.73	375	4.32	462	5.23	1	35557473	35567274	+	NCDN	neurochondrin [Source:HGNC Symbol%3BAcc:HGNC:17597]	GO:0045453:bone resorption;GO:0031175:neuron projection development;GO:0048168:regulation of neuronal synaptic plasticity;	GO:0005829:cytosol;GO:0030425:dendrite;GO:0010008:endosome membrane;GO:0016020:membrane;GO:0043025:neuronal cell body;GO:0043204:perikaryon;GO:0098794:postsynapse;	-	K09179	-
ENSG00000020181	7084	30	0.29	52	0.37	46	0.29	48	0.39	37	0.34	38	0.34	53	0.44	38	0.35	41	0.34	42	0.35	64	0.48	33	0.28	80	0.55	62	0.5	44	0.35	8	37784191	37844896	+	ADGRA2	adhesion G protein-coupled receptor A2 [Source:HGNC Symbol%3BAcc:HGNC:17849]	GO:0007166:cell surface receptor signaling pathway;GO:0007417:central nervous system development;GO:0043542:endothelial cell migration;GO:0007186:G protein-coupled receptor signaling pathway;GO:1900747:negative regulation of vascular endothelial growth factor signaling pathway;GO:0090263:positive regulation of canonical Wnt signaling pathway;GO:0010595:positive regulation of endothelial cell migr…	GO:0009986:cell surface;GO:0030175:filopodium;GO:0005886:plasma membrane;GO:1990909:Wnt signalosome;	GO:0004930:G protein-coupled receptor activity;	K08461	-
ENSG00000020219	1674	0	0	0	0	0	0	0	0	0	0	0	0	0	0	0	0	0	0	0	0	0	0	0	0	0	0	0	0	0	0	7	152445477	152447150	+	CCT8L1P	chaperonin containing TCP1 subunit 8 like 1%2C pseudogene [Source:HGNC Symbol%3BAcc:HGNC:32153]	GO:0006457:protein folding;	GO:0005832:chaperonin-containing T-complex;	GO:0005524:ATP binding;GO:0051082:unfolded protein binding;	K09500	-
ENSG00000020256	6790	560	5.57	702	5.18	748	4.99	643	5.42	529	5.12	561	5.26	591	5.06	514	4.93	654	5.64	644	5.59	712	5.54	627	5.47	763	5.43	565	4.72	654	5.36	20	52051663	52204308	-	ZFP64	ZFP64 zinc finger protein [Source:HGNC Symbol%3BAcc:HGNC:15940]	GO:0045944:positive regulation of transcription by RNA polymerase II;GO:0010468:regulation of gene expression;	GO:0005634:nucleus;	GO:0003677:DNA binding;GO:0046872:metal ion binding;	K11447;K14571	;ko05202 Transcriptional misregulation in cancer;;ko03008 Ribosome biogenesis in eukaryotes;
ENSG00000020426	3877	483	8.41	715	9.23	711	8.32	540	7.98	511	8.67	491	8.06	509	7.64	476	8	558	8.43	580	8.81	634	8.64	593	9.06	668	8.32	563	8.23	562	8.07	14	60734742	60969965	+	MNAT1	MNAT1 component of CDK activating kinase [Source:HGNC Symbol%3BAcc:HGNC:7181]	GO:0007512:adult heart development;GO:0006281:DNA repair;GO:0000082:G1/S transition of mitotic cell cycle;GO:0043066:negative regulation of apoptotic process;GO:1905775:negative regulation of DNA helicase activity;GO:0006289:nucleotide-excision repair;GO:0048661:positive regulation of smooth muscle cell proliferation;GO:0065003:protein-containing complex assembly;GO:0000079:regulation of cyclin-d…	GO:0070516:CAK-ERCC2 complex;GO:0019907:cyclin-dependent protein kinase activating kinase holoenzyme complex;GO:0005654:nucleoplasm;GO:0000439:transcription factor TFIIH core complex;GO:0005675:transcription factor TFIIH holo complex;GO:0070985:transcription factor TFIIK complex;	GO:0061575:cyclin-dependent protein serine/threonine kinase activator activity;GO:0047485:obsolete protein N-terminus binding;GO:0008270:zinc ion binding;GO:0046872:metal ion binding;	K10842	;ko03022 Basal transcription factors;ko03420 Nucleotide excision repair;
ENSG00000020577	12333	496	2.71	651	2.64	706	2.6	723	3.36	597	3.18	570	2.94	730	3.44	675	3.56	827	3.93	710	3.39	801	3.43	652	3.13	527	2.06	422	1.94	434	1.96	14	54566117	54793315	+	SAMD4A	sterile alpha motif domain containing 4A [Source:HGNC Symbol%3BAcc:HGNC:23023]	GO:0017148:negative regulation of translation;GO:0000289:nuclear-transcribed mRNA poly(A) tail shortening;GO:0045727:positive regulation of translation;GO:0043488:regulation of mRNA stability;	GO:0030054:cell junction;GO:0005829:cytosol;GO:0030425:dendrite;GO:0001650:fibrillar center;GO:0000932:P-body;GO:0045202:synapse;GO:0005737:cytoplasm;	GO:0003729:mRNA binding;GO:0003723:RNA binding;GO:0030371:translation repressor activity;	K12606;K06641	;ko03018 RNA degradation;;ko04110 Cell cycle;ko04115 p53 signaling pathway;ko04218 Cellular senescence;ko05166 Human T-cell leukemia virus 1 infection;
ENSG00000020633	4922	424	5.82	593	6.03	714	6.58	542	6.31	436	5.83	525	6.79	517	6.11	440	5.82	548	6.52	548	6.56	572	6.14	546	6.57	566	5.55	465	5.35	514	5.81	1	24899511	24965121	-	RUNX3	RUNX family transcription factor 3 [Source:HGNC Symbol%3BAcc:HGNC:10473]	GO:0002062:chondrocyte differentiation;GO:0030097:hemopoiesis;GO:0043371:negative regulation of CD4-positive, alpha-beta T cell differentiation;GO:0045786:negative regulation of cell cycle;GO:0050680:negative regulation of epithelial cell proliferation;GO:0000122:negative regulation of transcription by RNA polymerase II;GO:0030182:neuron differentiation;GO:0001503:ossification;GO:0048935:peripher…	GO:0000785:chromatin;GO:0016513:core-binding factor complex;GO:0005737:cytoplasm;GO:0005829:cytosol;GO:0043231:intracellular membrane-bounded organelle;GO:0005730:nucleolus;GO:0005654:nucleoplasm;GO:0005634:nucleus;	GO:0005524:ATP binding;GO:0003700:DNA-binding transcription factor activity;GO:0000981:DNA-binding transcription factor activity, RNA polymerase II-specific;GO:0000978:RNA polymerase II cis-regulatory region sequence-specific DNA binding;GO:0000977:RNA polymerase II transcription regulatory region sequence-specific DNA binding;GO:1990837:sequence-specific double-stranded DNA binding;	K09279	;ko04658 Th1 and Th2 cell differentiation;ko05169 Epstein-Barr virus infection;
ENSG00000020922	7674	1364	12	1867	12.18	1913	11.3	1472	10.99	1373	11.77	1314	10.89	1518	11.51	1306	11.08	1426	10.89	1358	10.42	1525	10.5	1383	10.67	2028	12.76	1678	12.39	1704	12.36	11	94415570	94493885	-	MRE11	MRE11 homolog%2C double strand break repair nuclease [Source:HGNC Symbol%3BAcc:HGNC:7230]	GO:0008283:cell population proliferation;GO:0006974:DNA damage response;GO:0000729:DNA double-strand break processing;GO:0032508:DNA duplex unwinding;GO:0006310:DNA recombination;GO:0006281:DNA repair;GO:0110025:DNA strand resection involved in replication fork processing;GO:0006302:double-strand break repair;GO:0000724:double-strand break repair via homologous recombination;GO:0006303:double-str…	GO:0000781:chromosome, telomeric region;GO:0005737:cytoplasm;GO:0005829:cytosol;GO:0030870:Mre11 complex;GO:0005654:nucleoplasm;GO:0005634:nucleus;GO:0016605:PML body;GO:0005657:replication fork;GO:0035861:site of double-strand break;	GO:0008408:3'-5' exonuclease activity;GO:0008296:3'-5'-DNA exonuclease activity;GO:0008409:5'-3' exonuclease activity;GO:0045296:cadherin binding;GO:0003690:double-stranded DNA binding;GO:0004520:DNA endonuclease activity;GO:0042802:identical protein binding;GO:0030145:manganese ion binding;GO:0004518:nuclease activity;GO:0008022:obsolete protein C-terminus binding;GO:0000014:single-stranded DNA …	K10865	;ko03440 Homologous recombination;ko03450 Non-homologous end-joining;ko04218 Cellular senescence;
ENSG00000021300	4933	36	0.49	41	0.42	64	0.59	46	0.53	37	0.49	28	0.36	44	0.52	30	0.4	34	0.4	36	0.43	40	0.43	40	0.48	65	0.64	48	0.55	50	0.56	11	73646178	73662819	+	PLEKHB1	pleckstrin homology domain containing B1 [Source:HGNC Symbol%3BAcc:HGNC:19079]	GO:0007602:phototransduction;GO:0045595:regulation of cell differentiation;	GO:0005737:cytoplasm;	-	-	-
ENSG00000021355	3047	630	13.96	791	12.99	859	12.78	735	13.82	689	14.87	647	13.51	661	12.62	597	12.76	672	12.92	658	12.72	755	13.1	659	12.81	874	13.85	686	12.76	735	13.42	6	2832332	2841959	-	SERPINB1	serpin family B member 1 [Source:HGNC Symbol%3BAcc:HGNC:3311]	GO:0010951:negative regulation of endopeptidase activity;GO:0032691:negative regulation of interleukin-1 beta production;GO:0044342:type B pancreatic cell proliferation;	GO:0062023:collagen-containing extracellular matrix;GO:0036464:cytoplasmic ribonucleoprotein granule;GO:0005769:early endosome;GO:0070062:extracellular exosome;GO:0005576:extracellular region;GO:0005615:extracellular space;GO:0005764:lysosome;GO:0016020:membrane;GO:0034774:secretory granule lumen;	GO:0030414:peptidase inhibitor activity;GO:0004867:serine-type endopeptidase inhibitor activity;	K13963	;ko05146 Amoebiasis;
ENSG00000021461	2628	0	0	0	0	0	0	0	0	0	0	0	0	0	0	0	0	0	0	0	0	3	0.06	0	0	0	0	0	0	0	0	7	99828013	99866093	+	CYP3A43	cytochrome P450 family 3 subfamily A member 43 [Source:HGNC Symbol%3BAcc:HGNC:17450]	GO:0070989:oxidative demethylation;GO:0008202:steroid metabolic process;GO:0046222:aflatoxin metabolic process;GO:0009822:alkaloid catabolic process;GO:0008209:androgen metabolic process;GO:0008203:cholesterol metabolic process;GO:0008210:estrogen metabolic process;GO:0046483:heterocycle metabolic process;GO:0002933:lipid hydroxylation;GO:0006629:lipid metabolic process;GO:0042759:long-chain fatt…	GO:0005789:endoplasmic reticulum membrane;GO:0005737:cytoplasm;GO:0043231:intracellular membrane-bounded organelle;	GO:0070330:aromatase activity;GO:0101020:estrogen 16-alpha-hydroxylase activity;GO:0020037:heme binding;GO:0005506:iron ion binding;GO:0004497:monooxygenase activity;GO:0008395:steroid hydroxylase activity;GO:0050649:testosterone 6-beta-hydroxylase activity;GO:0102320:1,8-cineole 2-exo-monooxygenase activity;GO:0062181:1-alpha,25-dihydroxyvitamin D3 23-hydroxylase activity;GO:0062188:anandamide 1…	K17692	;ko05204 Chemical carcinogenesis - DNA adducts;
ENSG00000021488	2598	1	0.03	0	0	0	0	0	0	1	0.03	0	0	2	0.04	0	0	0	0	0	0	1	0.02	0	0	0	0	1	0.02	1	0.02	19	32830509	32869767	-	SLC7A9	solute carrier family 7 member 9 [Source:HGNC Symbol%3BAcc:HGNC:11067]	GO:0015811:L-cystine transport;GO:0015804:neutral amino acid transport;GO:0065003:protein-containing complex assembly;	GO:0016324:apical plasma membrane;GO:0031526:brush border membrane;GO:0005886:plasma membrane;	GO:0015179:L-amino acid transmembrane transporter activity;GO:0015184:L-cystine transmembrane transporter activity;GO:0015175:neutral L-amino acid transmembrane transporter activity;GO:0042605:peptide antigen binding;	K13868	;ko04974 Protein digestion and absorption;
ENSG00000021574	9481	391	2.78	524	2.77	630	3.01	413	2.49	402	2.79	420	2.82	450	2.76	423	2.91	437	2.7	498	3.09	478	2.66	426	2.66	604	3.08	494	2.95	472	2.77	2	32063556	32157637	+	SPAST	spastin [Source:HGNC Symbol%3BAcc:HGNC:11233]	GO:0008089:anterograde axonal transport;GO:0019896:axonal transport of mitochondrion;GO:0007409:axonogenesis;GO:0032506:cytokinetic process;GO:0031122:cytoplasmic microtubule organization;GO:0061640:cytoskeleton-dependent cytokinesis;GO:0006888:endoplasmic reticulum to Golgi vesicle-mediated transport;GO:0010458:exit from mitosis;GO:0090148:membrane fission;GO:0008152:metabolic process;GO:0001578…	GO:1904115:axon cytoplasm;GO:0005813:centrosome;GO:0005737:cytoplasm;GO:0031410:cytoplasmic vesicle;GO:0005829:cytosol;GO:0005789:endoplasmic reticulum membrane;GO:0071782:endoplasmic reticulum tubular network;GO:0005768:endosome;GO:0070062:extracellular exosome;GO:0005811:lipid droplet;GO:0005874:microtubule;GO:0030496:midbody;GO:0031965:nuclear membrane;GO:0005654:nucleoplasm;GO:0005634:nucleus…	GO:0043014:alpha-tubulin binding;GO:0005524:ATP binding;GO:0048487:beta-tubulin binding;GO:0016853:isomerase activity;GO:0008017:microtubule binding;GO:0008568:microtubule severing ATPase activity;GO:0044877:protein-containing complex binding;	K13254	-
ENSG00000021645	15534	84	0.37	116	0.37	108	0.32	116	0.43	95	0.4	77	0.32	132	0.49	115	0.48	108	0.41	99	0.38	104	0.35	95	0.36	137	0.43	125	0.46	98	0.35	14	78170373	79868291	+	NRXN3	neurexin 3 [Source:HGNC Symbol%3BAcc:HGNC:8010]	GO:0001525:angiogenesis;GO:0007155:cell adhesion;GO:0007268:chemical synaptic transmission;GO:0007269:neurotransmitter secretion;GO:2000300:regulation of synaptic vesicle exocytosis;GO:0007416:synapse assembly;GO:0030534:adult behavior;GO:0007411:axon guidance;GO:0007612:learning;GO:0007158:neuron cell-cell adhesion;GO:0035176:social behavior;GO:0071625:vocalization behavior;GO:0007165:signal tra…	GO:0005576:extracellular region;GO:0005886:plasma membrane;GO:0098982:GABA-ergic synapse;GO:0042734:presynaptic membrane;GO:0032991:protein-containing complex;	GO:0005246:calcium channel regulator activity;GO:0046872:metal ion binding;GO:0050839:cell adhesion molecule binding;GO:0097109:neuroligin family protein binding;GO:0038023:signaling receptor activity;GO:0004888:transmembrane signaling receptor activity;	K07377	;ko04514 Cell adhesion molecules;
ENSG00000021762	7473	244	2.2	407	2.73	454	2.75	310	2.38	288	2.53	328	2.79	289	2.25	306	2.67	357	2.8	329	2.59	414	2.93	275	2.18	399	2.58	330	2.5	364	2.71	11	3087107	3166739	-	OSBPL5	oxysterol binding protein like 5 [Source:HGNC Symbol%3BAcc:HGNC:16392]	GO:0008203:cholesterol metabolic process;GO:0030301:cholesterol transport;GO:0006893:Golgi to plasma membrane transport;GO:0036150:phosphatidylserine acyl-chain remodeling;GO:0015914:phospholipid transport;	GO:0005829:cytosol;GO:0005789:endoplasmic reticulum membrane;GO:0140268:endoplasmic reticulum-plasma membrane contact site;GO:0043231:intracellular membrane-bounded organelle;GO:0016020:membrane;	GO:0015485:cholesterol binding;GO:0008142:oxysterol binding;GO:0070273:phosphatidylinositol-4-phosphate binding;GO:0001786:phosphatidylserine binding;GO:0140343:phosphatidylserine transfer activity;GO:0005548:phospholipid transporter activity;GO:0032934:sterol binding;GO:0015248:sterol transporter activity;	-	-
ENSG00000021776	13431	2281	11.46	3070	11.44	3707	12.51	2755	11.75	2392	11.71	2473	11.72	2731	11.83	2469	11.97	2807	12.25	2479	10.87	2958	11.64	2693	11.88	3331	11.98	2825	11.92	2819	11.68	15	34851782	34969742	-	AQR	aquarius intron-binding spliceosomal factor [Source:HGNC Symbol%3BAcc:HGNC:29513]	GO:0000398:mRNA splicing, via spliceosome;	GO:0071013:catalytic step 2 spliceosome;GO:0016020:membrane;GO:0005654:nucleoplasm;GO:0005634:nucleus;GO:0071007:U2-type catalytic step 2 spliceosome;	GO:0034458:3'-5' RNA helicase activity;GO:0005524:ATP binding;GO:0140603:obsolete ATP hydrolysis activity;GO:0003729:mRNA binding;GO:0003723:RNA binding;GO:0003727:single-stranded RNA binding;	K12874	;ko03040 Spliceosome;
ENSG00000021826	11018	19064	116.8	25406	115.43	28122	115.73	23405	121.67	20525	122.5	20317	117.33	21754	114.88	19945	117.89	21253	113.03	20444	109.3	23326	111.9	20783	111.73	30539	133.88	26540	136.5	26853	135.61	2	210477682	210679107	+	CPS1	carbamoyl-phosphate synthase 1 [Source:HGNC Symbol%3BAcc:HGNC:2323]	GO:0006207:'de novo' pyrimidine nucleobase biosynthetic process;GO:0055081:monoatomic anion homeostasis;GO:0070409:carbamoyl phosphate biosynthetic process;GO:0071242:cellular response to ammonium ion;GO:0071320:cellular response to cAMP;GO:0044344:cellular response to fibroblast growth factor stimulus;GO:0071377:cellular response to glucagon stimulus;GO:0071400:cellular response to oleic acid;GO…	GO:0005737:cytoplasm;GO:0005743:mitochondrial inner membrane;GO:0005759:mitochondrial matrix;GO:0042645:mitochondrial nucleoid;GO:0005730:nucleolus;GO:0032991:protein-containing complex;	GO:0005524:ATP binding;GO:0005509:calcium ion binding;GO:0004087:carbamoyl-phosphate synthase (ammonia) activity;GO:0004088:carbamoyl-phosphate synthase (glutamine-hydrolyzing) activity;GO:0004175:endopeptidase activity;GO:0016595:glutamate binding;GO:0072341:modified amino acid binding;GO:0005543:phospholipid binding;GO:0044877:protein-containing complex binding;	K01948	;ko00220 Arginine biosynthesis;ko00250 Alanine, aspartate and glutamate metabolism;ko00910 Nitrogen metabolism;ko01100 Metabolic pathways;ko01200 Carbon metabolism;ko01230 Biosynthesis of amino acids;
ENSG00000021852	3931	0	0	0	0	0	0	0	0	0	0	2	0.03	0	0	0	0	0	0	0	0	1	0.01	1	0.02	0	0	0	0	0	0	1	56929207	56974383	-	C8B	complement C8 beta chain [Source:HGNC Symbol%3BAcc:HGNC:1353]	GO:0006956:complement activation;GO:0006957:complement activation, alternative pathway;GO:0006958:complement activation, classical pathway;GO:0019835:cytolysis;GO:0006955:immune response;	GO:0070062:extracellular exosome;GO:0005576:extracellular region;GO:1903561:extracellular vesicle;GO:0016020:membrane;GO:0005579:membrane attack complex;	GO:0044877:protein-containing complex binding;	K03998	;ko04610 Complement and coagulation cascades;ko04810 Regulation of actin cytoskeleton;ko05020 Prion disease;ko05146 Amoebiasis;ko05171 Coronavirus disease - COVID-19;ko05322 Systemic lupus erythematosus;
ENSG00000022267	5862	895	10.31	1214	10.37	1345	10.4	1223	11.95	1000	11.22	1117	12.12	1058	10.5	1029	11.43	1114	11.14	1101	11.06	1265	11.41	1053	10.64	1236	10.18	1020	9.86	1042	9.89	X	136146702	136211359	+	FHL1	four and a half LIM domains 1 [Source:HGNC Symbol%3BAcc:HGNC:3702]	GO:0030154:cell differentiation;GO:0007517:muscle organ development;GO:0030308:negative regulation of cell growth;GO:2000134:negative regulation of G1/S transition of mitotic cell cycle;GO:0010972:negative regulation of G2/M transition of mitotic cell cycle;GO:0043268:positive regulation of potassium ion transport;GO:0003254:regulation of membrane depolarization;GO:1901016:regulation of potassium…	GO:0005737:cytoplasm;GO:0005634:nucleus;GO:0005829:cytosol;GO:0005925:focal adhesion;GO:0005886:plasma membrane;	GO:0046872:metal ion binding;GO:0044325:transmembrane transporter binding;	K14365	;ko04630 JAK-STAT signaling pathway;
ENSG00000022277	4063	1623	26.97	2254	27.77	2409	26.88	2012	28.36	1615	26.14	1647	25.79	1836	26.29	1647	26.4	1835	26.46	1811	26.26	2119	27.57	1876	27.35	2203	26.19	1865	26.01	1943	26.61	20	56468585	56519449	+	RTF2	replication termination factor 2 [Source:HGNC Symbol%3BAcc:HGNC:15890]	GO:0072711:cellular response to hydroxyurea;GO:1902979:mitotic DNA replication termination;GO:0097752:regulation of DNA stability;GO:0071171:site-specific DNA replication termination at RTS1 barrier;	GO:0005634:nucleus;GO:0005657:replication fork;	GO:0003677:DNA binding;	-	-
ENSG00000022355	8420	0	0	0	0	0	0	0	0	0	0	0	0	0	0	0	0	0	0	0	0	0	0	0	0	1	0.01	0	0	0	0	5	161847063	161899981	+	GABRA1	gamma-aminobutyric acid type A receptor subunit alpha1 [Source:HGNC Symbol%3BAcc:HGNC:4075]	GO:0071420:cellular response to histamine;GO:0007268:chemical synaptic transmission;GO:1902476:chloride transmembrane transport;GO:0007214:gamma-aminobutyric acid signaling pathway;GO:1904862:inhibitory synapse assembly;GO:0034220:monoatomic ion transmembrane transport;GO:0050877:nervous system process;GO:0042391:regulation of membrane potential;GO:0060078:regulation of postsynaptic membrane pote…	GO:0034707:chloride channel complex;GO:0030659:cytoplasmic vesicle membrane;GO:0032590:dendrite membrane;GO:1902710:GABA receptor complex;GO:1902711:GABA-A receptor complex;GO:0098982:GABA-ergic synapse;GO:0099060:obsolete integral component of postsynaptic specialization membrane;GO:0043005:neuron projection;GO:0005886:plasma membrane;GO:0098794:postsynapse;GO:0045202:synapse;GO:0045211:postsyna…	GO:0050809:diazepam binding;GO:0008144:obsolete drug binding;GO:0004890:GABA-A receptor activity;GO:0022851:GABA-gated chloride ion channel activity;GO:0005237:inhibitory extracellular ligand-gated monoatomic ion channel activity;GO:0030594:neurotransmitter receptor activity;GO:1904315:transmitter-gated monoatomic ion channel activity involved in regulation of postsynaptic membrane potential;GO:0…	K05175	;ko04080 Neuroactive ligand-receptor interaction;ko04723 Retrograde endocannabinoid signaling;ko04727 GABAergic synapse;ko04742 Taste transduction;ko05032 Morphine addiction;ko05033 Nicotine addiction;
ENSG00000022556	6313	0	0	0	0	0	0	0	0	0	0	0	0	0	0	1	0.01	0	0	0	0	1	0.01	0	0	0	0	0	0	0	0	19	54953130	55001142	+	NLRP2	NLR family pyrin domain containing 2 [Source:HGNC Symbol%3BAcc:HGNC:22948]	GO:0006915:apoptotic process;GO:0006954:inflammatory response;GO:0045087:innate immune response;GO:0032088:negative regulation of NF-kappaB transcription factor activity;GO:0043280:positive regulation of cysteine-type endopeptidase activity involved in apoptotic process;GO:0032731:positive regulation of interleukin-1 beta production;	GO:0005737:cytoplasm;GO:0005829:cytosol;GO:0005794:Golgi apparatus;GO:0043231:intracellular membrane-bounded organelle;	GO:0005524:ATP binding;GO:0032090:Pyrin domain binding;	K19409;K09228	-;ko05168 Herpes simplex virus 1 infection;
ENSG00000022567	8608	83	0.65	168	0.98	145	0.76	126	0.84	123	0.94	92	0.68	126	0.85	102	0.77	124	0.84	122	0.83	145	0.89	129	0.89	133	0.75	121	0.8	135	0.87	8	141207166	141308305	-	SLC45A4	solute carrier family 45 member 4 [Source:HGNC Symbol%3BAcc:HGNC:29196]	GO:0015770:sucrose transport;	GO:0016020:membrane;	GO:0008506:sucrose:proton symporter activity;	K15378	-
ENSG00000022840	5900	1072	12.27	1354	11.49	1612	12.39	1243	12.07	1059	11.8	1130	12.19	1287	12.69	1173	12.95	1349	13.4	1263	12.61	1380	12.36	1196	12.01	1484	12.15	1307	12.55	1345	12.68	12	120533480	120577588	+	RNF10	ring finger protein 10 [Source:HGNC Symbol%3BAcc:HGNC:10055]	GO:0010626:negative regulation of Schwann cell proliferation;GO:0031643:positive regulation of myelination;GO:0045944:positive regulation of transcription by RNA polymerase II;GO:0045893:positive regulation of DNA-templated transcription;GO:0051865:protein autoubiquitination;GO:0099527:postsynapse to nucleus signaling pathway;	GO:0005737:cytoplasm;GO:0005634:nucleus;GO:0099147:extrinsic component of postsynaptic density membrane;GO:0098978:glutamatergic synapse;	GO:0046872:metal ion binding;GO:0000976:transcription cis-regulatory region binding;GO:0061630:ubiquitin protein ligase activity;	K17985	;ko04137 Mitophagy - animal;ko04140 Autophagy - animal;ko05010 Alzheimer disease;ko05014 Amyotrophic lateral sclerosis;ko05016 Huntington disease;ko05017 Spinocerebellar ataxia;ko05022 Pathways of neurodegeneration - multiple diseases;
ENSG00000022976	5595	93	1.12	163	1.46	171	1.39	125	1.28	98	1.15	106	1.21	122	1.27	110	1.28	106	1.11	113	1.19	153	1.45	143	1.51	173	1.49	140	1.42	146	1.45	14	102317377	102342702	+	ZNF839	zinc finger protein 839 [Source:HGNC Symbol%3BAcc:HGNC:20345]	-	-	GO:0046872:metal ion binding;	K11447;K12756	;ko05202 Transcriptional misregulation in cancer;;ko04510 Focal adhesion;ko04520 Adherens junction;ko04670 Leukocyte transendothelial migration;ko04810 Regulation of actin cytoskeleton;ko04814 Motor proteins;ko05131 Shigellosis;ko05132 Salmonella infection;
ENSG00000023041	9250	1116	8.14	1553	8.4	1659	8.13	1375	8.51	1180	8.39	1207	8.3	1269	7.98	1130	7.96	1302	8.25	1290	8.22	1362	7.78	1275	8.16	1577	8.23	1277	7.82	1360	8.18	10	112424428	112447572	-	ZDHHC6	zinc finger DHHC-type palmitoyltransferase 6 [Source:HGNC Symbol%3BAcc:HGNC:19160]	GO:0010636:positive regulation of mitochondrial fusion;GO:0018345:protein palmitoylation;	GO:0005783:endoplasmic reticulum;GO:0005789:endoplasmic reticulum membrane;	GO:0016409:palmitoyltransferase activity;GO:0019706:protein-cysteine S-palmitoyltransferase activity;GO:0140439:protein-cysteine S-stearoyltransferase activity;	K18932	-
ENSG00000023171	14932	1030	4.66	1496	5.02	1554	4.72	1129	4.33	1061	4.67	1054	4.49	1084	4.22	841	3.67	1152	4.52	1124	4.43	1471	5.21	1183	4.69	1110	3.59	1047	3.97	1155	4.3	11	123358428	123627774	+	GRAMD1B	GRAM domain containing 1B [Source:HGNC Symbol%3BAcc:HGNC:29214]	GO:0071397:cellular response to cholesterol;GO:0042632:cholesterol homeostasis;	GO:0005789:endoplasmic reticulum membrane;GO:0140268:endoplasmic reticulum-plasma membrane contact site;GO:0016020:membrane;GO:0005886:plasma membrane;GO:0005829:cytosol;GO:0070062:extracellular exosome;	GO:0015485:cholesterol binding;GO:0120020:cholesterol transfer activity;GO:0070300:phosphatidic acid binding;GO:0001786:phosphatidylserine binding;GO:0042803:protein homodimerization activity;	K08857	-
ENSG00000023191	7374	396	3.63	583	3.96	754	4.64	468	3.64	484	4.32	541	4.67	489	3.86	429	3.79	462	3.67	509	4.07	533	3.82	506	4.06	678	4.44	488	3.75	550	4.15	11	494512	507300	-	RNH1	ribonuclease/angiogenin inhibitor 1 [Source:HGNC Symbol%3BAcc:HGNC:10074]	GO:0006402:mRNA catabolic process;GO:0045765:regulation of angiogenesis;	GO:0032311:angiogenin-PRI complex;GO:0005829:cytosol;GO:0070062:extracellular exosome;GO:0005654:nucleoplasm;	GO:0008428:ribonuclease inhibitor activity;	K16634;K17985	-;ko04137 Mitophagy - animal;ko04140 Autophagy - animal;ko05010 Alzheimer disease;ko05014 Amyotrophic lateral sclerosis;ko05016 Huntington disease;ko05017 Spinocerebellar ataxia;ko05022 Pathways of neurodegeneration - multiple diseases;
ENSG00000023228	12174	4329	24	5725	23.54	6073	22.62	4733	22.27	4286	23.15	4234	22.13	4734	22.63	4149	22.19	4841	23.3	4472	21.64	5255	22.82	4650	22.62	6175	24.5	5083	23.66	5390	24.64	2	206114817	206159509	-	NDUFS1	NADH:ubiquinone oxidoreductase core subunit S1 [Source:HGNC Symbol%3BAcc:HGNC:7707]	GO:0008637:apoptotic mitochondrial changes;GO:0046034:ATP metabolic process;GO:0045333:cellular respiration;GO:0006120:mitochondrial electron transport, NADH to ubiquinone;GO:0032981:mitochondrial respiratory chain complex I assembly;GO:0072593:reactive oxygen species metabolic process;GO:0051881:regulation of mitochondrial membrane potential;	GO:0005758:mitochondrial intermembrane space;GO:0005759:mitochondrial matrix;GO:0005747:mitochondrial respiratory chain complex I;GO:0005739:mitochondrion;GO:0005743:mitochondrial inner membrane;	GO:0051537:2 iron, 2 sulfur cluster binding;GO:0051539:4 iron, 4 sulfur cluster binding;GO:0009055:electron transfer activity;GO:0046872:metal ion binding;GO:0008137:NADH dehydrogenase (ubiquinone) activity;	K03934	;ko00190 Oxidative phosphorylation;ko01100 Metabolic pathways;ko04714 Thermogenesis;ko04723 Retrograde endocannabinoid signaling;ko04932 Non-alcoholic fatty liver disease;ko05010 Alzheimer disease;ko05012 Parkinson disease;ko05014 Amyotrophic lateral sclerosis;ko05016 Huntington disease;ko05020 Prion disease;ko05022 Pathways of neurodegeneration - multiple diseases;ko05208 Chemical carcinogenesis…
ENSG00000023287	7613	1484	13.16	1999	13.14	2091	12.45	1539	11.58	1474	12.73	1399	11.69	1616	12.35	1536	13.14	1711	13.17	1798	13.91	1746	12.12	1559	12.13	2000	12.69	1551	11.54	1626	11.88	8	52622458	52745843	-	RB1CC1	RB1 inducible coiled-coil 1 [Source:HGNC Symbol%3BAcc:HGNC:15574]	GO:0000045:autophagosome assembly;GO:0006914:autophagy;GO:0000422:autophagy of mitochondrion;GO:0030242:autophagy of peroxisome;GO:0007049:cell cycle;GO:0061723:glycophagy;GO:0007507:heart development;GO:0001889:liver development;GO:2001237:negative regulation of extrinsic apoptotic signaling pathway;GO:0034727:piecemeal microautophagy of the nucleus;GO:0045793:positive regulation of cell size;GO…	GO:1990316:Atg1/ULK1 kinase complex;GO:0000421:autophagosome membrane;GO:0005829:cytosol;GO:0005789:endoplasmic reticulum membrane;GO:0019898:extrinsic component of membrane;GO:0005764:lysosome;GO:0031965:nuclear membrane;GO:0000407:phagophore assembly site;GO:0034045:phagophore assembly site membrane;GO:0005737:cytoplasm;GO:0005634:nucleus;	GO:0060090:molecular adaptor activity;GO:0019901:protein kinase binding;	K17589	;ko04140 Autophagy - animal;ko04211 Longevity regulating pathway;ko05010 Alzheimer disease;ko05014 Amyotrophic lateral sclerosis;ko05016 Huntington disease;ko05017 Spinocerebellar ataxia;ko05022 Pathways of neurodegeneration - multiple diseases;
ENSG00000023318	14212	1418	6.74	2080	7.33	2286	7.29	1867	7.52	1581	7.32	1639	7.34	1633	6.69	1456	6.67	1681	6.93	1730	7.17	1871	6.96	1740	7.25	1984	6.74	1713	6.83	1627	6.37	9	99979185	100099052	-	ERP44	endoplasmic reticulum protein 44 [Source:HGNC Symbol%3BAcc:HGNC:18311]	GO:0045454:cell redox homeostasis;GO:0009100:glycoprotein metabolic process;GO:0006457:protein folding;GO:0034976:response to endoplasmic reticulum stress;GO:0006986:response to unfolded protein;	GO:0009986:cell surface;GO:0005788:endoplasmic reticulum lumen;GO:0005789:endoplasmic reticulum membrane;GO:0005793:endoplasmic reticulum-Golgi intermediate compartment;GO:0070062:extracellular exosome;GO:0005576:extracellular region;GO:0035580:specific granule lumen;GO:0005654:nucleoplasm;	GO:0003756:protein disulfide isomerase activity;	K17264;K12581	-;ko03018 RNA degradation;
ENSG00000023330	2536	1075	28.62	1343	26.51	1621	28.98	1333	30.11	1056	27.38	1178	29.56	1144	26.25	959	24.63	1271	29.37	1254	29.13	1312	27.34	1301	30.39	1227	23.37	1155	25.81	1175	25.78	3	52198086	52214327	+	ALAS1	5'-aminolevulinate synthase 1 [Source:HGNC Symbol%3BAcc:HGNC:396]	GO:0048821:erythrocyte development;GO:0006783:heme biosynthetic process;GO:0042541:hemoglobin biosynthetic process;GO:0006782:protoporphyrinogen IX biosynthetic process;GO:0001666:response to hypoxia;	GO:0005829:cytosol;GO:0005759:mitochondrial matrix;GO:0005739:mitochondrion;GO:0005654:nucleoplasm;	GO:0003870:5-aminolevulinate synthase activity;GO:0042802:identical protein binding;GO:0030170:pyridoxal phosphate binding;	K00643	;ko00260 Glycine, serine and threonine metabolism;ko00860 Porphyrin metabolism;ko01100 Metabolic pathways;ko01240 Biosynthesis of cofactors;
ENSG00000023445	7518	395	3.55	705	4.69	706	4.26	640	4.88	539	4.71	532	4.5	429	3.32	446	3.86	539	4.2	671	5.26	698	4.91	649	5.11	322	2.07	277	2.09	300	2.22	11	102317450	102339403	+	BIRC3	baculoviral IAP repeat containing 3 [Source:HGNC Symbol%3BAcc:HGNC:591]	GO:0007166:cell surface receptor signaling pathway;GO:0007249:canonical NF-kappaB signal transduction;GO:0043066:negative regulation of apoptotic process;GO:0060546:negative regulation of necroptotic process;GO:0038061:non-canonical NF-kappaB signal transduction;GO:0043123:positive regulation of canonical NF-kappaB signal transduction;GO:0031398:positive regulation of protein ubiquitination;GO:00…	GO:0005737:cytoplasm;GO:0005829:cytosol;GO:0045121:membrane raft;GO:0005654:nucleoplasm;GO:0005634:nucleus;GO:0032991:protein-containing complex;	GO:0043027:cysteine-type endopeptidase inhibitor activity involved in apoptotic process;GO:0046872:metal ion binding;GO:0044877:protein-containing complex binding;GO:0016740:transferase activity;GO:0061630:ubiquitin protein ligase activity;GO:0004842:ubiquitin-protein transferase activity;	K16060;K09228	;ko01524 Platinum drug resistance;ko04064 NF-kappa B signaling pathway;ko04120 Ubiquitin mediated proteolysis;ko04210 Apoptosis;ko04215 Apoptosis - multiple species;ko04217 Necroptosis;ko04390 Hippo signaling pathway;ko04510 Focal adhesion;ko04621 NOD-like receptor signaling pathway;ko04624 Toll and Imd signaling pathway;ko04668 TNF signaling pathway;ko05132 Salmonella infection;ko05145 Toxoplasm…
ENSG00000023516	9915	1220	8.31	1727	8.72	1805	8.25	1338	7.73	1397	9.27	1434	9.2	1371	8.05	1330	8.74	1206	7.13	1585	9.42	1648	8.79	1342	8.02	1786	8.7	1477	8.44	1629	9.14	13	42272152	42323261	+	AKAP11	A-kinase anchoring protein 11 [Source:HGNC Symbol%3BAcc:HGNC:369]	GO:0030866:cortical actin cytoskeleton organization;GO:0035556:intracellular signal transduction;GO:0008104:protein localization;GO:0036010:protein localization to endosome;GO:0003091:renal water homeostasis;	GO:0005737:cytoplasm;GO:0005829:cytosol;GO:0005815:microtubule organizing center;GO:0005730:nucleolus;GO:0005777:peroxisome;GO:0005886:plasma membrane;	GO:0019207:kinase regulator activity;GO:0051018:protein kinase A binding;GO:0034237:protein kinase A regulatory subunit binding;GO:0008157:protein phosphatase 1 binding;	K16527	-
ENSG00000023572	6210	555	6.03	851	6.86	856	6.25	639	5.89	605	6.41	655	6.71	598	5.6	548	5.75	585	5.52	680	6.45	680	5.79	680	6.49	848	6.6	683	6.23	722	6.47	1	193090866	193106114	-	GLRX2	glutaredoxin 2 [Source:HGNC Symbol%3BAcc:HGNC:16065]	GO:0007568:obsolete aging;GO:0006915:apoptotic process;GO:0030154:cell differentiation;GO:0045454:cell redox homeostasis;GO:0071451:cellular response to superoxide;GO:0042262:DNA protection;GO:0006749:glutathione metabolic process;GO:0009966:regulation of signal transduction;GO:0006355:regulation of DNA-templated transcription;GO:0042542:response to hydrogen peroxide;GO:0010033:response to organi…	GO:0030425:dendrite;GO:0043231:intracellular membrane-bounded organelle;GO:0005759:mitochondrial matrix;GO:0005739:mitochondrion;GO:0043025:neuronal cell body;GO:0005654:nucleoplasm;GO:0005634:nucleus;	GO:0051537:2 iron, 2 sulfur cluster binding;GO:0008794:arsenate reductase (glutaredoxin) activity;GO:0009055:electron transfer activity;GO:0015038:glutathione disulfide oxidoreductase activity;GO:0097573:obsolete glutathione oxidoreductase activity;GO:0046872:metal ion binding;GO:0003756:protein disulfide isomerase activity;	K03676	-
ENSG00000023608	2593	330	8.59	443	8.55	431	7.54	395	8.72	282	7.15	320	7.85	481	10.79	421	10.57	485	10.96	442	10.04	422	8.6	450	10.28	361	6.72	302	6.6	366	7.85	14	61762420	61796428	+	SNAPC1	small nuclear RNA activating complex polypeptide 1 [Source:HGNC Symbol%3BAcc:HGNC:11134]	GO:0042795:snRNA transcription by RNA polymerase II;GO:0042796:snRNA transcription by RNA polymerase III;	GO:0005730:nucleolus;GO:0005654:nucleoplasm;GO:0019185:snRNA-activating protein complex;	GO:0016251:RNA polymerase II general transcription initiation factor activity;GO:0000995:RNA polymerase III general transcription initiation factor activity;GO:0043565:sequence-specific DNA binding;	K15208	-
ENSG00000023697	2813	553	13.27	671	11.94	760	12.25	586	11.93	507	11.85	523	11.83	569	11.77	500	11.58	565	11.77	537	11.25	655	12.31	562	11.83	740	12.71	696	14.02	601	11.89	12	15911302	16037381	+	DERA	deoxyribose-phosphate aldolase [Source:HGNC Symbol%3BAcc:HGNC:24269]	GO:0016052:carbohydrate catabolic process;GO:0046121:deoxyribonucleoside catabolic process;GO:0009264:deoxyribonucleotide catabolic process;GO:0046386:deoxyribose phosphate catabolic process;GO:0006098:pentose-phosphate shunt;	GO:0005829:cytosol;GO:0005576:extracellular region;GO:1904813:ficolin-1-rich granule lumen;GO:0005654:nucleoplasm;GO:0034774:secretory granule lumen;	GO:0004139:deoxyribose-phosphate aldolase activity;	K01619	;ko00030 Pentose phosphate pathway;ko01100 Metabolic pathways;
ENSG00000023734	2215	4329	131.93	6138	138.72	6588	134.86	4895	126.58	4383	130.13	4586	131.73	5063	133	4768	140.18	5152	136.29	5254	139.73	5782	137.97	5203	139.13	5951	129.77	5194	132.88	5261	132.16	12	15882387	15903478	+	STRAP	serine/threonine kinase receptor associated protein [Source:HGNC Symbol%3BAcc:HGNC:30796]	GO:0000380:alternative mRNA splicing, via spliceosome;GO:0030277:maintenance of gastrointestinal epithelium;GO:0000122:negative regulation of transcription by RNA polymerase II;GO:0030512:negative regulation of transforming growth factor beta receptor signaling pathway;GO:0030182:neuron differentiation;GO:0000387:spliceosomal snRNP assembly;	GO:0005737:cytoplasm;GO:0005829:cytosol;GO:0005634:nucleus;GO:0032797:SMN complex;GO:0034719:SMN-Sm protein complex;	GO:0003729:mRNA binding;GO:0003723:RNA binding;GO:0005102:signaling receptor binding;GO:1990447:U2 snRNP binding;	K13137	-
ENSG00000023839	7837	42	0.36	59	0.38	72	0.42	62	0.45	35	0.29	43	0.35	50	0.37	47	0.39	43	0.32	46	0.35	61	0.41	55	0.42	56	0.35	68	0.49	69	0.49	10	99782640	99852594	+	ABCC2	ATP binding cassette subfamily C member 2 [Source:HGNC Symbol%3BAcc:HGNC:53]	GO:1901086:benzylpenicillin metabolic process;GO:0015721:bile acid and bile salt transport;GO:0038183:bile acid signaling pathway;GO:0015723:bilirubin transport;GO:0015722:canalicular bile acid transport;GO:0030644:intracellular chloride ion homeostasis;GO:0071549:cellular response to dexamethasone stimulus;GO:0071347:cellular response to interleukin-1;GO:0071354:cellular response to interleukin-…	GO:0016324:apical plasma membrane;GO:0031526:brush border membrane;GO:0009986:cell surface;GO:0046581:intercellular canaliculus;GO:0046691:intracellular canaliculus;GO:0016020:membrane;GO:0005886:plasma membrane;	GO:0015431:ABC-type glutathione S-conjugate transporter activity;GO:0008559:ABC-type xenobiotic transporter activity;GO:0005524:ATP binding;GO:0043225:ATPase-coupled inorganic anion transmembrane transporter activity;GO:0042626:ATPase-coupled transmembrane transporter activity;GO:0015127:bilirubin transmembrane transporter activity;GO:0008514:organic anion transmembrane transporter activity;GO:00…	K05666	;ko01523 Antifolate resistance;ko01524 Platinum drug resistance;ko02010 ABC transporters;ko04976 Bile secretion;
ENSG00000023892	5066	1	0.01	3	0.03	3	0.03	0	0	2	0.03	3	0.04	5	0.06	1	0.01	3	0.03	1	0.01	2	0.02	2	0.02	0	0	1	0.01	4	0.04	6	35297818	35321771	+	DEF6	DEF6 guanine nucleotide exchange factor [Source:HGNC Symbol%3BAcc:HGNC:2760]	GO:0051056:regulation of small GTPase mediated signal transduction;	GO:0005737:cytoplasm;GO:0005856:cytoskeleton;GO:0005829:cytosol;GO:0030175:filopodium;GO:0016020:membrane;GO:0005654:nucleoplasm;GO:0005634:nucleus;GO:0048471:perinuclear region of cytoplasm;GO:0005886:plasma membrane;	GO:0005085:guanyl-nucleotide exchange factor activity;	K06115;K17985	-;ko04137 Mitophagy - animal;ko04140 Autophagy - animal;ko05010 Alzheimer disease;ko05014 Amyotrophic lateral sclerosis;ko05016 Huntington disease;ko05017 Spinocerebellar ataxia;ko05022 Pathways of neurodegeneration - multiple diseases;
ENSG00000023902	6629	49	0.5	63	0.48	70	0.48	46	0.4	43	0.43	42	0.4	53	0.47	47	0.46	68	0.6	45	0.4	61	0.49	64	0.57	56	0.41	44	0.38	33	0.28	1	150149183	150164720	+	PLEKHO1	pleckstrin homology domain containing O1 [Source:HGNC Symbol%3BAcc:HGNC:24310]	GO:0072673:lamellipodium morphogenesis;GO:0007520:myoblast fusion;GO:0051451:myoblast migration;GO:0008360:regulation of cell shape;	GO:0005737:cytoplasm;GO:0036195:muscle cell projection membrane;GO:0005634:nucleus;GO:0032587:ruffle membrane;GO:0016020:membrane;	-	-	-
ENSG00000023909	5426	1888	23.49	2635	24.31	2878	24.05	2160	22.8	1979	23.98	2148	25.19	2136	22.91	1975	23.7	2177	23.51	2824	30.66	2635	25.67	2340	25.54	2531	22.53	1950	20.37	1980	20.3	1	93885199	93909456	-	GCLM	glutamate-cysteine ligase modifier subunit [Source:HGNC Symbol%3BAcc:HGNC:4312]	GO:0007568:obsolete aging;GO:0008637:apoptotic mitochondrial changes;GO:0097746:blood vessel diameter maintenance;GO:0044344:cellular response to fibroblast growth factor stimulus;GO:0071372:cellular response to follicle-stimulating hormone stimulus;GO:0071333:cellular response to glucose stimulus;GO:0035729:cellular response to hepatocyte growth factor stimulus;GO:1990830:cellular response to le…	GO:0005829:cytosol;GO:0017109:glutamate-cysteine ligase complex;	GO:0047834:D-threo-aldose 1-dehydrogenase activity;GO:0030234:enzyme regulator activity;GO:0004357:glutamate-cysteine ligase activity;GO:0035226:glutamate-cysteine ligase catalytic subunit binding;GO:0044877:protein-containing complex binding;	K11205	;ko00270 Cysteine and methionine metabolism;ko00480 Glutathione metabolism;ko01100 Metabolic pathways;ko01240 Biosynthesis of cofactors;ko04216 Ferroptosis;
ENSG00000024048	8874	932	7.09	1174	6.62	1267	6.47	1084	7	936	6.94	958	6.87	906	5.94	814	5.97	922	6.09	1010	6.7	1144	6.81	1066	7.12	1123	6.11	1000	6.39	991	6.21	6	42564029	42693505	+	UBR2	ubiquitin protein ligase E3 component n-recognin 2 [Source:HGNC Symbol%3BAcc:HGNC:21289]	GO:0071233:cellular response to leucine;GO:0033522:histone H2A ubiquitination;GO:0007141:male meiosis I;GO:0007140:male meiotic nuclear division;GO:0032007:negative regulation of TOR signaling;GO:0010529:obsolete negative regulation of transposition;GO:0016567:protein ubiquitination;GO:0007131:reciprocal meiotic recombination;GO:0007283:spermatogenesis;GO:0071596:ubiquitin-dependent protein catab…	GO:0000785:chromatin;GO:0005737:cytoplasm;GO:0005829:cytosol;GO:0005634:nucleus;GO:0000151:ubiquitin ligase complex;	GO:0070728:leucine binding;GO:0061630:ubiquitin protein ligase activity;GO:0008270:zinc ion binding;	K10626	-
ENSG00000024422	3844	1544	27.11	1919	24.99	2337	27.57	1790	26.67	1548	26.48	1686	27.91	1879	28.44	1636	27.72	1866	28.44	1755	26.89	2062	28.35	1750	26.97	2248	28.25	1949	28.73	1811	26.21	19	47713422	47743134	+	EHD2	EH domain containing 2 [Source:HGNC Symbol%3BAcc:HGNC:3243]	GO:0060271:cilium assembly;GO:0030866:cortical actin cytoskeleton organization;GO:0032456:endocytic recycling;GO:0006897:endocytosis;GO:0016197:endosomal transport;GO:0097320:plasma membrane tubulation;GO:2001137:positive regulation of endocytic recycling;GO:1901741:positive regulation of myoblast fusion;GO:0072659:protein localization to plasma membrane;	GO:0005901:caveola;GO:0005829:cytosol;GO:0005769:early endosome;GO:0030139:endocytic vesicle;GO:0010008:endosome membrane;GO:0070062:extracellular exosome;GO:0019898:extrinsic component of membrane;GO:0045171:intercellular bridge;GO:0043231:intracellular membrane-bounded organelle;GO:0015630:microtubule cytoskeleton;GO:0005634:nucleus;GO:0048471:perinuclear region of cytoplasm;GO:0005886:plasma m…	GO:0005524:ATP binding;GO:0005509:calcium ion binding;GO:0005525:GTP binding;GO:0016787:hydrolase activity;GO:0042802:identical protein binding;GO:0003676:nucleic acid binding;GO:0019904:protein domain specific binding;GO:0042803:protein homodimerization activity;	K12469;K15696	-
ENSG00000024526	5904	2062	23.58	3020	25.61	2933	22.52	1616	15.68	1708	19.02	1665	17.94	2404	23.69	2156	23.78	2302	22.85	2124	21.19	2135	19.11	1977	19.83	2893	23.67	2370	22.75	2451	23.1	1	68474152	68497221	-	DEPDC1	DEP domain containing 1 [Source:HGNC Symbol%3BAcc:HGNC:22949]	GO:0035556:intracellular signal transduction;GO:0045892:negative regulation of DNA-templated transcription;	GO:0005634:nucleus;GO:0017053:transcription repressor complex;	GO:0005096:GTPase activator activity;	-	-
ENSG00000024862	1247	144	7.8	180	7.23	230	8.36	166	7.62	152	8.02	174	8.88	194	9.05	170	8.88	157	7.38	174	8.22	215	9.11	157	7.46	202	7.82	176	8	175	7.81	6	138773769	138793319	+	CCDC28A	coiled-coil domain containing 28A [Source:HGNC Symbol%3BAcc:HGNC:21098]	-	-	-	-	-
ENSG00000025039	5095	14	0.19	25	0.25	24	0.21	31	0.35	15	0.19	23	0.29	19	0.22	17	0.22	24	0.28	31	0.36	17	0.18	31	0.36	30	0.28	14	0.16	17	0.19	6	89364616	89412273	-	RRAGD	Ras related GTP binding D [Source:HGNC Symbol%3BAcc:HGNC:19903]	GO:0071230:cellular response to amino acid stimulus;GO:0071233:cellular response to leucine;GO:1990253:cellular response to leucine starvation;GO:0009267:cellular response to starvation;GO:0032008:positive regulation of TOR signaling;GO:1904263:positive regulation of TORC1 signaling;GO:0010506:regulation of autophagy;	GO:0005813:centrosome;GO:0005737:cytoplasm;GO:0005829:cytosol;GO:1990131:Gtr1-Gtr2 GTPase complex;GO:0043231:intracellular membrane-bounded organelle;GO:0005764:lysosome;GO:0005654:nucleoplasm;GO:0005634:nucleus;GO:0071986:Ragulator complex;	GO:0019003:GDP binding;GO:0005525:GTP binding;GO:0003924:GTPase activity;GO:0051020:GTPase binding;GO:0046982:protein heterodimerization activity;	K16186	;ko04140 Autophagy - animal;ko04150 mTOR signaling pathway;ko05131 Shigellosis;
ENSG00000025156	2697	346	8.66	426	7.91	516	8.67	357	7.58	299	7.29	327	7.71	453	9.77	336	8.11	395	8.58	394	8.61	415	8.13	429	9.42	500	8.95	432	9.08	447	9.22	6	122399551	122433119	+	HSF2	heat shock transcription factor 2 [Source:HGNC Symbol%3BAcc:HGNC:5225]	GO:0045944:positive regulation of transcription by RNA polymerase II;GO:0006357:regulation of transcription by RNA polymerase II;GO:0007283:spermatogenesis;	GO:0000785:chromatin;GO:0005737:cytoplasm;GO:0005654:nucleoplasm;GO:0005634:nucleus;	GO:0001228:DNA-binding transcription activator activity, RNA polymerase II-specific;GO:0003700:DNA-binding transcription factor activity;GO:0000981:DNA-binding transcription factor activity, RNA polymerase II-specific;GO:0042802:identical protein binding;GO:0000978:RNA polymerase II cis-regulatory region sequence-specific DNA binding;GO:0001162:RNA polymerase II intronic transcription regulatory …	K09415	-
ENSG00000025293	8372	1395	11.25	1804	10.79	1991	10.78	1597	10.93	1375	10.8	1323	10.05	1659	11.53	1456	11.33	1719	12.03	1620	11.4	1775	11.21	1605	11.36	1896	10.94	1662	11.25	1647	10.95	20	35771974	35950370	+	PHF20	PHD finger protein 20 [Source:HGNC Symbol%3BAcc:HGNC:16098]	GO:0016573:histone acetylation;GO:0043984:histone H4-K16 acetylation;GO:0043981:histone H4-K5 acetylation;GO:0043982:histone H4-K8 acetylation;GO:0006357:regulation of transcription by RNA polymerase II;	GO:0005829:cytosol;GO:0000123:histone acetyltransferase complex;GO:0071339:MLL1 complex;GO:0044545:NSL complex;GO:0031965:nuclear membrane;GO:0005654:nucleoplasm;	GO:0003677:DNA binding;GO:0046872:metal ion binding;	K18402	-
ENSG00000025423	2272	12	0.36	34	0.75	24	0.48	27	0.68	18	0.52	18	0.5	31	0.79	26	0.75	13	0.34	25	0.65	13	0.3	18	0.47	27	0.57	37	0.92	33	0.81	12	56752161	56787790	+	HSD17B6	hydroxysteroid 17-beta dehydrogenase 6 [Source:HGNC Symbol%3BAcc:HGNC:23316]	GO:0006702:androgen biosynthetic process;GO:0006710:androgen catabolic process;GO:0062175:brexanolone catabolic process;	GO:0031901:early endosome membrane;GO:0005783:endoplasmic reticulum;	GO:0044594:17-beta-hydroxysteroid dehydrogenase (NAD+) activity;GO:0072582:17-beta-hydroxysteroid dehydrogenase (NADP+) activity;GO:0047024:5alpha-androstane-3beta,17beta-diol dehydrogenase activity;GO:0047044:androstan-3-alpha,17-beta-diol dehydrogenase activity;GO:0047023:androsterone dehydrogenase activity;GO:0003824:catalytic activity;GO:0009055:electron transfer activity;GO:0004745:NAD-retin…	K13369	;ko00140 Steroid hormone biosynthesis;ko00830 Retinol metabolism;ko01100 Metabolic pathways;ko01240 Biosynthesis of cofactors;
ENSG00000025434	4534	172	2.56	224	2.47	252	2.52	227	2.87	189	2.74	193	2.71	198	2.54	179	2.57	175	2.26	169	2.2	249	2.9	205	2.68	263	2.8	226	2.82	248	3.04	11	47248300	47269033	+	NR1H3	nuclear receptor subfamily 1 group H member 3 [Source:HGNC Symbol%3BAcc:HGNC:7966]	GO:0043277:apoptotic cell clearance;GO:0030154:cell differentiation;GO:0071222:cellular response to lipopolysaccharide;GO:0042632:cholesterol homeostasis;GO:0055088:lipid homeostasis;GO:0010887:negative regulation of cholesterol storage;GO:0120163:negative regulation of cold-induced thermogenesis;GO:0050728:negative regulation of inflammatory response;GO:0060336:negative regulation of type II int…	GO:0000785:chromatin;GO:0005737:cytoplasm;GO:0005829:cytosol;GO:0005654:nucleoplasm;GO:0005634:nucleus;GO:0043235:receptor complex;GO:0090575:RNA polymerase II transcription regulator complex;	GO:0015485:cholesterol binding;GO:0003677:DNA binding;GO:0001228:DNA-binding transcription activator activity, RNA polymerase II-specific;GO:0000981:DNA-binding transcription factor activity, RNA polymerase II-specific;GO:0004879:nuclear receptor activity;GO:0000978:RNA polymerase II cis-regulatory region sequence-specific DNA binding;GO:0032810:sterol response element binding;GO:0000976:transcri…	K08536	;ko03320 PPAR signaling pathway;ko04148 Efferocytosis;ko04931 Insulin resistance;ko04932 Non-alcoholic fatty liver disease;ko05160 Hepatitis C;
ENSG00000025708	3600	79	1.48	94	1.31	160	2.02	131	2.08	140	2.56	151	2.67	85	1.37	79	1.43	104	1.69	107	1.75	148	2.17	96	1.58	86	1.15	65	1.02	68	1.05	22	50525752	50530032	-	TYMP	thymidine phosphorylase [Source:HGNC Symbol%3BAcc:HGNC:3148]	GO:0001525:angiogenesis;GO:0030154:cell differentiation;GO:0006935:chemotaxis;GO:0046074:dTMP catabolic process;GO:0000002:mitochondrial genome maintenance;GO:0006206:pyrimidine nucleobase metabolic process;GO:0006213:pyrimidine nucleoside metabolic process;GO:1905333:regulation of gastric motility;GO:0031641:regulation of myelination;GO:0051969:regulation of transmission of nerve impulse;	GO:0005829:cytosol;	GO:0004645:1,4-alpha-oligoglucan phosphorylase activity;GO:0008083:growth factor activity;GO:0042803:protein homodimerization activity;GO:0016154:pyrimidine-nucleoside phosphorylase activity;GO:0009032:thymidine phosphorylase activity;	K00758	;ko00240 Pyrimidine metabolism;ko00983 Drug metabolism - other enzymes;ko01100 Metabolic pathways;ko01232 Nucleotide metabolism;ko05219 Bladder cancer;
[truncated: 61,358 more rows]
