# Supplementary figures and images for: MORC2 Mediates Transcriptional Regulation Through Liquid-Liquid Phase Separation and DNA Binding
Source: eLife journal article supplement (doi:10.7554/elife.108479), 2025-09-29

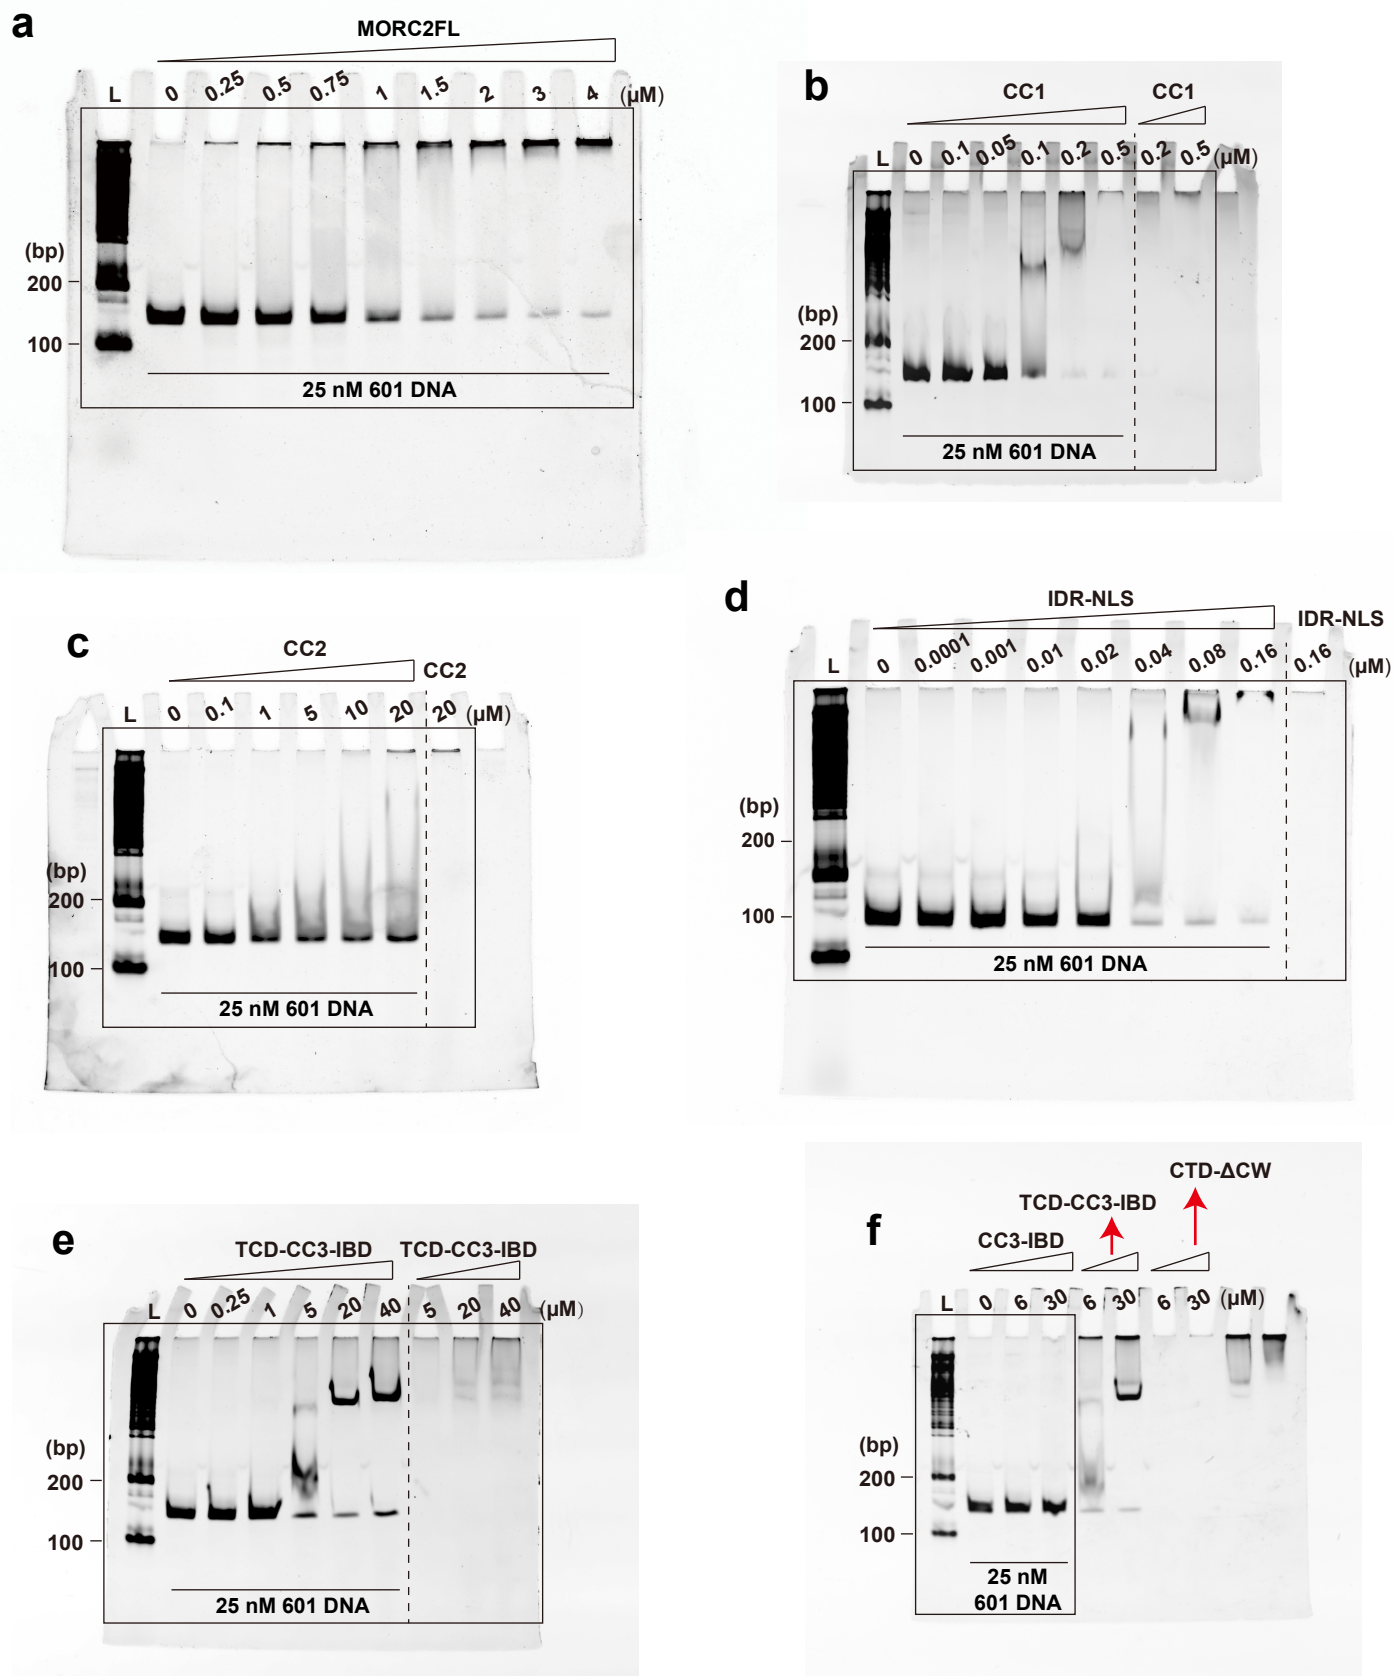

**Figure 5-Source data 1** Original gels corresponding to Figure 5, panel a-f

Supplement: fig5-data2 [file Figure 5-Source data 1.pdf › Figure 5-Source data 1.pdf]
